# Supplementary material for: Rate-limiting transport of positively charged arginine residues through the Sec-machinery is integral to the mechanism of protein secretion
Source: eLife. 2022 Apr 29;11:e77586. doi: 10.7554/eLife.77586 (PMC9110029; doi:10.7554/eLife.77586)
Supplement: Figure 2—source data 1. [file elife-77586-fig2-data1.xlsx]

## Sheet: Sheet1
time from injection (min)	wt	FW	LA	FW	LA	FW	LA	LXX	∆φ1	AL	TV	wt	∆φ1	LXX	wt	LXX	AL	TV	LXX	wt	AL	TV	∆φ1	wt	∆h1	QR	wt	∆h1	KR	RQ	QK	∆h3	KQ	∆h1	wt	∆φ2	KR	RQ	KR	RQ	wt	∆φ2	wt	∆φ2	∆h2	RK	QE	∆h3	KQ
-8.1	14019	15103	20867	14804	20967	13516	19803	16727	16351	13443	14055	14536	17503	14553	13370	11571	11797	11900	10664	5479	5519	5873	8707	5815	7672	11524	7804	8066	7902	6882	8353	9585	5788	14668	13088	13302	11618	9449	12002	13468	13494	11678	14089	13183	15981	14769	13365	6208	4206
-8.01667	14846	15792	21942	16080	22274	15103	22010	17171	17087	14383	14998	15354	18454	15612	14153	12444	12401	12968	11360	5591	5808	6048	9083	6479	8257	12656	8039	8189	8026	7450	8920	10225	6257	14964	13964	13505	12114	10375	12377	13938	14040	12575	14695	12963	16945	15310	14162	6699	4508
-7.93333	15452	16635	23464	16776	23183	16000	23289	17653	18265	15084	15773	16042	19207	16358	14802	13282	13121	13936	12300	5663	6018	6418	9132	6951	8816	13525	8159	8573	8828	7533	9177	10233	6593	15420	14165	14223	12867	10839	12848	14315	14757	13299	15420	13796	17228	15804	15091	7095	4616
-7.85	16549	17729	24386	17664	24618	16752	24668	18244	18997	15632	16115	16297	20353	17115	15363	13613	13857	14781	12838	5979	6317	6397	9528	7575	9153	14045	8156	8908	8734	7903	9350	11125	6901	16074	14754	14624	13348	11308	13475	14785	15260	13772	15985	14060	17958	16575	15642	7582	4762
-7.76667	17300	18356	25852	18403	25872	17407	26032	18658	19729	16057	16878	16974	20898	17498	16089	14431	14388	15167	13736	5842	6269	6600	9517	7838	9320	14740	8777	9083	9192	8220	9688	11608	7239	16299	15042	15283	13959	12144	13642	14947	15388	14720	16575	14643	18548	17496	16334	7367	4945
-7.68333	17582	18730	26138	18876	27257	18415	26628	19143	20230	16711	17646	17515	21516	18413	16316	14908	15049	16248	14506	6161	6527	6913	9790	8350	9398	15512	9207	9368	9475	8288	10035	11799	7365	17031	15224	15803	14157	12424	13964	15949	15988	15052	17304	14527	18822	17740	16822	8096	5322
-7.6	18368	19206	27041	19572	27685	18848	27933	19325	21049	17073	18097	17874	22069	18615	16786	15299	15455	16519	15245	6401	6669	6993	10102	8383	9806	15684	9388	9682	9809	8959	10040	12421	7907	17243	16135	16799	14566	13156	13893	15801	16700	15554	17820	15155	19443	18188	16981	7972	5154
-7.51667	18805	19957	27456	20353	28729	19637	29307	20030	21724	17619	18543	18264	22092	19252	17366	15931	16090	17206	15442	6404	7002	7103	10278	8938	10084	16399	9392	9842	9913	9142	10642	12522	8097	17112	16529	16544	14700	13616	14658	16136	16916	16117	18195	15062	20020	18791	17751	8467	5182
-7.43333	19626	20369	28442	20672	29124	19938	29619	20856	22124	17757	18420	18361	22788	19362	17767	16224	16214	17485	16339	6663	7028	7135	10569	9167	10397	16954	9813	10066	10165	9057	10798	13111	8267	17734	16706	17005	15448	13696	14763	16806	17133	16430	18606	15473	20241	19345	18198	8805	5706
-7.35	20004	20780	28851	21138	30031	20428	30110	21008	22619	18102	18973	19156	23295	19812	18028	17124	17186	17964	16151	6791	7279	7429	10736	9728	10778	17527	9748	10371	10639	9295	11222	12991	8464	18176	17070	17329	15600	14104	14971	16796	17383	16462	18678	15514	20920	19522	18659	8841	5782
-7.26667	20376	21115	29439	21324	30389	21014	31053	21180	23113	18575	19233	19517	24072	20884	18445	17138	17215	18276	16958	7060	7207	7539	11088	9901	10915	17880	10504	10651	10606	9692	11623	13283	8688	18320	17112	18124	16258	14499	15111	17333	17814	16966	19590	15768	21346	20168	18868	9023	5819
-7.18333	20926	21573	30085	22072	31360	21584	31617	21662	23456	18871	19580	19545	24307	20828	18663	17812	17476	19381	17687	7039	7498	7760	11324	10066	11088	18123	10494	10619	11010	9760	11850	13793	8937	18714	17581	18215	16024	14808	15775	17303	18426	17514	19666	16065	21860	20415	19420	9229	5837
-7.1	20869	22028	31009	22454	31887	22072	32043	21615	23869	19441	19816	19930	24737	20705	19252	17948	18309	19472	17858	7212	7592	7822	11514	10440	11236	18852	10894	11093	11130	9987	12251	13965	9249	18849	18517	18498	16452	15242	16018	17684	18134	17832	20127	16285	21920	20757	19770	9700	6086
-7.01667	21600	22153	30813	22667	32524	22506	32939	21576	24475	19626	20047	20396	24814	21419	19470	18653	18428	20068	18607	7407	7716	8055	11355	10650	11686	19304	10764	11061	11303	10105	12436	14364	9377	19275	18021	18872	16788	15494	16014	17824	18870	18199	20760	16343	22326	21370	20038	9716	6258
-6.93333	22037	23038	31969	23035	33119	22784	33401	22597	24379	19463	20509	20180	25484	21714	19780	18960	18877	20697	18876	7371	7742	7988	11740	10822	11984	19841	10898	11422	11481	10176	12175	14488	9641	19413	18791	18732	17280	15852	16364	17911	18768	18581	20840	16783	22619	21328	20693	9753	6316
-6.85	21949	23223	32628	23635	33793	22945	34307	22494	25017	20008	21333	20773	25450	21988	19794	19549	19309	20828	18742	7629	8176	8266	11869	11009	12079	20072	11398	11551	11838	10519	12789	14737	9782	19876	18887	19487	17424	16102	16733	18098	19409	18776	21266	17138	22821	22296	20485	9955	6327
-6.76667	22299	22948	32580	23985	33318	23307	34455	22957	25583	20800	20989	21021	25768	22168	20555	19541	19726	21091	19419	7619	8042	8357	11877	11230	12380	20270	11342	11669	11908	10724	12597	15357	9842	20247	19010	19703	17921	16340	16761	18600	19704	19076	21860	16860	23098	22067	21403	10387	6448
-6.68333	22582	23568	32921	24087	34585	23479	35473	22794	25811	20532	21397	21171	25961	22737	20977	20223	20000	21579	19688	7863	8286	8485	12019	11768	12630	20786	11820	11864	11998	10934	12869	15337	10086	20377	19216	19659	18104	16720	17289	18931	19873	19206	21955	17388	23534	22422	21447	10696	6572
-6.6	23051	24210	33168	24580	34955	24262	35935	23380	25984	20488	21928	21548	26473	23109	20748	20231	20221	21852	19747	7721	8477	8863	12282	11649	12882	21015	11809	12080	12310	11242	13171	15415	10524	20965	19403	19982	18080	16479	17379	18779	20291	19623	22581	17543	24020	22826	21736	10714	6901
-6.51667	23195	24168	33884	24614	34959	24340	35712	23626	26316	20991	22013	21889	26769	23134	20937	20537	20344	22240	20586	8207	8522	8715	12955	12192	12638	21628	11992	12250	12579	11004	13458	15890	10734	21317	19657	20112	18561	17130	17467	18926	20231	19853	22535	17562	24268	23026	22096	10554	6787
-6.43333	23691	24808	34445	24794	35791	24205	36267	23825	26599	21358	21941	22306	27128	23433	21204	20948	20616	22872	20895	8379	8472	9057	12667	12183	13155	21734	12207	12437	12750	11239	13410	16511	10690	21174	19677	20918	18777	17353	17747	19264	20222	19829	22695	17909	24659	22994	22432	11245	6908
-6.35	24098	24827	34871	24868	35948	24991	37064	23921	26957	21404	22699	22082	27171	24051	21591	21208	20997	23223	21632	8319	8918	8914	13106	11980	13335	22484	12261	12632	12542	11534	13584	16508	11173	21281	20171	20989	18742	17767	17897	19619	20735	20298	23230	18039	24725	23546	22359	11238	6962
-6.26667	24548	25266	35313	25648	36097	25190	36927	24747	27015	21886	22608	22390	27477	24000	22112	21394	21170	23259	21292	8624	8866	8982	13141	12561	13726	22504	12549	13106	13045	11960	14022	16622	11201	21709	20151	20815	19017	17919	18155	19535	20422	20498	23644	18142	24824	24086	22831	11621	7050
-6.18333	24842	25200	35605	25315	36756	25561	37702	24757	26940	21662	23049	22522	27915	24359	22172	21553	21848	23637	21768	8367	8941	9311	13042	12946	13778	23258	12789	12924	13190	11979	14322	16841	11470	21935	20524	21339	19551	18094	18322	19873	20866	20706	24038	18446	25779	24196	23135	11469	7296
-6.1	24950	25746	35784	25959	36967	25496	37880	24781	27385	22117	22777	22843	28564	24473	22784	22121	21488	24134	22132	8942	9470	9505	13355	13279	14036	23176	12764	13226	13505	12597	14243	17098	11594	22257	21242	21591	19622	18439	18455	19934	21059	21193	23893	18674	25623	24738	23381	11769	7292
-6.01667	24968	25924	36242	26324	37612	25695	38535	24838	27732	22278	23157	23364	28054	24743	22375	22530	22253	23923	22523	8940	9210	9385	13289	13133	14322	23483	13201	13241	13321	12102	14240	17362	11698	22265	21016	21587	19789	18705	18827	20223	21586	21602	23929	18736	25869	25001	23658	12281	7529
-5.93333	25196	26430	36797	26672	37991	25911	38470	25012	28096	22650	23069	22762	28400	24955	22860	22476	22170	24240	22638	8877	9486	9616	13563	13491	14521	24435	13307	13349	13701	12223	14733	17748	11844	22484	21405	22084	19877	18912	18990	20330	21610	21426	24761	18795	26166	24697	23917	12159	7492
-5.85	25841	26166	36479	26872	38357	26272	38992	24971	28048	22695	23487	23626	28788	25329	22740	22801	22249	24695	23222	8993	9560	9724	13771	13652	14578	23993	13178	13660	14202	12473	14643	17776	12272	22869	21541	21994	20289	19049	18959	20606	21678	21921	24698	18718	26580	25810	24296	12759	7816
-5.76667	25347	26658	36617	26754	38514	26614	39210	25513	28438	22894	23818	23414	29102	25167	23256	22945	22974	25124	22973	9393	9792	9844	13960	13718	15045	24621	13444	13617	13843	12694	14656	18069	12487	22743	21389	22510	20345	19485	19281	20727	21881	21886	25053	19056	26827	25466	24054	12650	7866
-5.68333	26284	26810	37552	27355	38513	26583	39916	25577	28474	23047	23948	23643	28963	25648	23575	23201	22855	24960	24069	9263	9937	9860	14305	13879	14917	24863	13707	13933	14063	12650	15063	18093	12371	22972	22310	22582	20431	19246	19635	21035	21885	22074	25509	19417	26734	26097	24774	12738	7689
-5.6	26376	26933	37533	27266	39345	26689	39861	25685	28846	23324	23875	23483	29321	25537	23640	23504	23458	25477	23675	9355	9814	9912	14189	14215	15088	25319	13782	14075	14207	13134	15464	18283	12637	23405	21948	23041	20611	20294	19578	21037	22228	22396	25460	19643	26948	26187	24986	12745	8009
-5.51667	26909	27193	37986	27122	39397	27116	40587	26301	28857	23441	23933	24100	28911	25934	23923	24141	23103	25835	24011	9443	9988	9983	14118	14297	15163	25890	13874	14123	14185	13272	15334	18532	12970	23719	22270	23147	21197	20206	20086	21281	22440	22050	25573	19885	27268	26431	25616	12962	8051
-5.43333	26843	27412	38164	27865	39445	26994	40936	26058	29183	23861	24579	24391	29716	25480	23584	24063	23262	25754	24017	9920	9886	9956	14505	14487	15607	25889	14081	14165	14685	13513	15960	18672	12866	23522	22359	23511	21252	19949	19548	21624	22302	22829	26122	19569	27544	26103	25477	13140	8079
-5.35	26961	27585	38873	27832	40525	27860	41275	26244	29710	23804	24858	24376	29948	25936	24663	24375	23881	26381	24486	9749	10192	10132	14586	14780	15682	26373	14271	14360	14926	13608	15984	18963	13116	23873	22404	23530	21232	20060	20192	21611	22475	23073	26173	19987	28020	26495	25790	13446	8041
-5.26667	26998	27724	38389	28311	40004	27635	41457	26755	29922	23552	24758	24248	29969	25977	24442	24048	23570	26670	24651	9879	10321	10309	15208	14828	15737	26526	14365	14638	15130	13734	16258	19111	13436	24178	22719	23725	21058	20756	20115	22194	22871	22998	26963	20066	28250	26976	25961	13458	8165
-5.18333	27371	28005	39145	28452	40641	27606	41960	26550	29724	23537	24909	24403	30666	26438	24566	24277	23837	26707	24994	9891	10540	10360	14874	14895	15909	27145	15043	14822	14790	13725	15972	19409	13400	24288	22402	23911	21588	20502	20556	21842	23069	23151	27095	20447	28367	26855	25952	13626	8355
-5.1	27365	28363	39316	28452	40861	27971	41862	26986	30183	23857	24873	24750	30633	26420	24818	24507	24522	26801	24652	10029	10267	10653	15108	15338	16148	27129	14732	15060	15081	14056	15903	19352	13574	24646	23516	24177	22104	20842	20487	22171	22957	23421	27329	20105	28309	27757	25987	13822	8521
-5.01667	27758	28593	39405	28423	41412	28012	41995	26874	30168	24162	25166	25387	30774	27154	24768	24720	24169	27331	25148	10049	10871	10728	15072	15594	15847	27620	15065	15221	15487	13661	16105	19898	13687	25176	23582	23906	21757	20854	20410	22556	23669	23656	27237	20345	28737	28174	26757	13941	8666
-4.93333	28212	28575	40071	29027	41504	28386	42489	26819	30245	24281	25499	24678	30911	27291	25120	25307	24461	27474	25795	10276	10808	10877	15220	15525	16557	27262	14949	15275	15620	13826	16600	19928	14042	25082	23792	24431	22049	21046	20456	22157	23883	24305	27318	20368	28556	28386	27103	14205	8921
-4.85	28125	29167	40283	29011	41743	28484	42797	26834	30689	24417	25377	24654	30877	27424	25183	25046	24867	27690	26189	10330	10361	10785	15061	15864	16935	27769	15230	15197	15822	14557	16590	20435	13943	24919	23754	24359	22303	21601	21281	22612	23489	24138	27497	20869	28956	28317	27104	14382	8760
-4.76667	28327	29000	40066	29478	42152	29142	43181	27322	30646	24465	25825	25151	30984	27495	25497	25332	24683	27400	25963	10448	10770	10724	15621	15925	16521	28254	15710	15349	15889	14602	16786	20783	14291	25323	23682	24536	22428	21917	21072	22799	23461	24335	27718	21191	29439	28387	27705	14357	9036
-4.68333	28253	29408	40470	29054	42540	28729	43544	27372	30639	24595	25654	25187	31495	27602	25516	25722	25244	27886	26281	10611	11192	11061	15752	16037	16787	28685	15852	15780	15825	14477	16787	20665	14513	25694	24403	25462	22807	21705	21222	22902	23923	24576	28171	21219	29549	28633	27510	14797	9046
-4.6	28823	29218	41357	29564	42606	28868	43773	27812	31147	24717	25990	25330	31231	27416	26071	25662	25368	28291	26101	10474	11158	11050	15758	16602	16997	28716	15925	15981	15784	14703	16878	20622	14595	26034	24082	25400	23118	22033	21559	22807	24118	24684	28563	21398	29572	28578	27854	14974	8786
-4.51667	28961	29703	40825	29993	42243	29239	44006	27388	31362	24919	26115	25659	31609	28011	26099	26544	25609	28707	26362	10734	11278	11330	16099	16447	17015	29335	15888	15899	15961	14795	17248	20770	14451	25891	24280	25577	22869	22434	21614	23058	24156	25073	28558	21915	30154	29290	27789	15218	9110
-4.43333	29158	29990	41388	29903	42696	29311	44401	27653	31175	25122	26284	25778	31963	27688	25894	26391	25347	28651	26406	10736	11009	11314	15935	16701	16924	29646	16212	16012	16163	14792	17419	21387	14722	26205	24693	25472	23067	22285	21658	23419	24456	25138	28231	22041	29887	28856	28169	15063	9402
-4.35	29245	29997	41538	30013	43238	29977	44863	27940	31251	25083	26310	25649	31607	28021	26370	26396	25567	29037	27230	10685	11377	11293	16157	16721	17394	29354	16262	16156	16528	15023	17531	21229	14711	25880	24790	26099	23198	22548	21705	23510	24424	24740	28951	21567	30347	29285	28299	15166	9438
-4.26667	29167	29970	41791	30028	43025	29402	44610	28110	32292	25358	26404	26190	32274	28321	26475	26439	26034	29058	27057	11121	11308	11571	16180	16907	17647	30135	16250	16398	16580	15230	17908	21311	14942	26134	24862	26216	23150	22718	22075	23229	24660	25402	29258	21929	30687	29619	28580	15766	9541
-4.18333	29554	30374	42452	30655	43776	29860	45108	28055	32019	25410	26548	26366	31993	28512	26556	27105	26524	29267	27284	10963	11455	11336	16263	17030	17603	30339	16414	16362	16929	15133	17252	21885	15330	26841	25063	25832	23548	22514	21944	24197	24492	25069	29355	21987	30016	29947	28735	15499	9712
-4.1	29549	29919	42481	30799	43754	30004	45135	28432	32086	25499	26558	26052	32698	28270	26937	27038	26307	29663	27206	11381	11524	11428	16620	17247	17762	30859	16996	16423	16756	15538	17954	21572	15266	26789	25168	26237	23634	23231	21979	24288	25099	25774	29191	21785	30881	30293	29208	15808	9404
-4.01667	29910	30181	42974	30799	44246	30362	45023	28150	32001	25755	26687	25959	32637	28503	27013	27001	26301	29639	27842	11436	11664	11740	16798	17580	17734	30535	16655	16672	16880	15615	18267	22057	15610	27212	25380	26346	23739	23316	22485	24272	24935	25517	29853	22226	30909	29966	29384	16130	9639
-3.93333	30145	30932	43070	30681	44117	30273	45630	28425	32224	25620	26859	26380	32553	28701	26949	27255	26606	29996	27490	11352	11745	11842	16847	17706	18019	31299	16911	16752	16919	15641	18417	22195	15487	27400	25515	26580	23941	23552	22348	24549	25307	25755	29836	22073	31223	30415	29603	16187	9887
-3.85	30086	30721	43136	30260	44982	30356	45716	28289	32249	25797	27228	26418	33055	28917	27357	27302	26879	29767	28148	11456	12145	11534	16989	17208	18373	31151	17022	17009	17387	15738	18186	22483	15650	27235	25221	26462	24143	23592	22566	24403	25083	25917	29353	22826	31391	30794	30048	16383	10072
-3.76667	30500	30693	43203	31089	45158	30652	46739	29377	32117	25629	26878	26601	33052	28756	27375	27505	26709	29956	28419	11527	11647	11959	16987	17819	18294	31493	17489	17017	17473	15858	18535	22393	15848	27669	25554	26839	24053	23631	22542	24232	25222	25986	30652	22650	32070	30710	29529	16492	9877
-3.68333	30578	31343	43515	30989	45122	30507	46942	28797	32783	25934	27089	26928	33343	28925	27506	28099	26506	30232	28537	11603	12033	12001	16907	17928	18507	31358	17182	16959	17499	15791	18584	22782	15742	27774	25695	27009	24364	23822	22750	24452	25331	26120	30486	22536	31925	30506	30272	16404	10151
-3.6	30536	31532	43932	31061	45329	30692	46355	28825	32899	26383	27623	26544	33490	29295	27690	27766	26960	30345	28693	11792	11868	12299	16897	18243	18692	32295	17297	17119	17436	16358	18790	22799	15746	27419	25845	26848	24570	24069	22475	24965	25697	27034	30118	22870	32016	30928	29912	16464	10038
-3.51667	30930	31372	44181	31326	46151	30827	46762	29162	33154	26492	27264	27027	33566	29252	27723	28354	26992	30310	28971	11500	12348	12118	17085	18146	18752	32628	17538	17359	17971	16199	18935	23004	16213	28027	25965	27379	24421	24015	23146	25157	25721	26557	31048	22757	32441	31057	29943	16847	10313
-3.43333	30929	31480	44280	31406	45632	30732	47566	29536	32938	26491	27370	27098	34017	28948	27596	28431	27350	31010	28822	11807	12503	12185	17461	18490	19039	32771	17620	17203	17605	16112	19208	23502	16112	28139	26454	27460	24237	24319	23302	24957	26325	26857	30732	22938	32199	31503	30504	17209	10142
-3.35	30955	31150	44164	31595	46072	30924	47519	29342	33260	26402	27608	27308	34128	28984	28071	28137	27718	30801	28932	11860	12421	12424	17214	18171	19201	32762	17455	17526	17965	16283	19369	23556	16725	27964	25919	27425	24809	24517	23036	25176	26056	26931	30772	23461	32854	32025	30928	16821	10648
-3.26667	31092	32014	44751	31771	46370	31477	47845	29810	33296	26578	27943	27137	34041	29687	27762	28326	27453	30830	28967	12370	12470	12629	17877	18803	19630	32928	17449	17925	18270	16488	19090	23404	16381	28433	26153	27515	25069	24501	23457	25297	26488	27102	31206	23435	32531	32000	30490	17229	10587
-3.18333	31743	32193	44385	32310	46511	31115	48067	29909	33722	26704	27984	27673	33878	29456	28689	28777	27942	30863	29070	12368	12109	12730	17671	18933	19193	33279	18280	17848	18191	16632	19390	23577	16895	28273	26444	27559	24883	24736	23485	25433	26465	27236	31404	23568	32971	32260	31195	17085	10610
-3.1	31706	31762	45030	32237	46388	31657	48159	29729	33286	26584	28121	27339	33839	30100	28457	28712	28116	31178	29079	12097	12568	12690	17883	19029	19528	33469	18106	17868	18794	16584	19486	23880	16752	28331	25939	27651	25182	24673	23977	25419	26530	27105	31701	23682	33684	32050	31445	17477	10734
-3.01667	31336	31968	45172	32076	47012	31433	48757	29975	33191	27003	28251	27176	33760	30017	28518	28628	28338	31244	29708	12241	12731	12548	17697	18884	20142	33689	18356	18178	18416	16583	19538	24051	17025	28545	26153	27740	24836	24940	23465	25461	26415	27321	31635	23473	32892	32330	31807	17814	10860
-2.93333	31826	31981	44988	32799	47158	31724	48473	29873	34048	26622	28003	27390	34372	30251	28561	28681	28254	31503	29746	12456	12699	12886	17972	19039	20140	34166	18315	18171	18842	17173	19635	24346	16988	28952	26670	27951	25561	25262	23889	25947	26209	27178	32151	23727	33201	32721	31703	17963	10840
-2.85	31671	32074	45216	32542	47651	31894	48742	29999	33673	27429	28160	27478	34182	30129	28569	29301	28736	31811	29525	12540	13128	12946	18260	19181	19730	34172	18609	18214	18653	17041	19961	24117	17242	28811	26215	28524	25592	25284	23938	25778	26666	27860	32529	23749	33695	33154	31703	18218	10990
-2.76667	32282	32503	45843	33004	47744	31717	48824	30122	34074	26835	28316	27300	34454	30333	29032	29330	28910	31504	29708	12748	12846	12792	18186	19669	20148	34643	18758	18451	18753	17064	20252	24609	17188	29525	26516	28564	25883	25398	23921	25985	27093	28216	32452	23920	33934	32854	31745	17663	11370
-2.68333	31619	32097	46178	33163	47631	32444	49090	30245	34292	27366	28249	27890	34759	30519	29070	29870	28727	31555	29899	12482	13353	12934	18080	19342	20323	35169	18589	18682	18729	17240	20153	24456	17291	28923	26921	28409	25827	25622	24045	25817	26607	28182	32730	24515	33798	33140	31851	18071	11098
-2.6	31870	32738	46642	32930	47959	31653	49591	30450	34650	27255	28687	27732	34541	30363	29041	29535	29176	31890	30260	12519	12763	12881	18524	19385	20069	34946	19127	18812	19248	17121	20497	24654	17324	29179	27006	28138	26139	25766	24267	26186	26819	28116	32671	24622	33986	33326	32263	18733	11350
-2.51667	32699	32679	45598	32749	47439	31782	49373	30294	33956	27313	28416	27872	34588	30338	29274	29579	29330	32331	30219	12411	13217	12988	18214	19653	20547	35255	18809	18754	19064	17614	20237	24893	17898	29303	27163	28797	26182	25591	24102	26259	27002	28403	32476	24433	34040	33496	32787	18539	11129
-2.43333	32534	32664	46611	32714	48435	32392	49590	30928	34453	27399	28973	28425	34730	30424	29206	30019	29387	32247	30305	12766	13339	13180	18445	19511	20308	35405	19214	19018	19136	17378	20319	24886	17677	29362	27432	28629	26056	25805	24564	26254	27421	28198	32756	24241	34177	33810	32880	18686	11184
-2.35	32354	32827	47201	33164	48605	32345	50088	30814	34598	26913	28519	28609	35211	30744	29378	29757	28772	32485	30805	12659	13248	13269	18566	19840	20308	36234	19068	18567	19210	17765	20639	25191	17949	29370	26904	29309	26057	26266	24834	26539	27285	28712	32946	24469	34617	33158	33348	18644	11746
-2.26667	32699	33386	47006	33440	48961	32418	49043	30440	34546	27524	28893	28282	34799	31115	29058	29576	29192	32475	30456	13023	13364	13412	18586	20240	20550	35876	19185	18943	19501	17935	20566	25578	18164	29613	27799	28850	25936	26365	24891	26540	27138	28544	33536	24584	34730	33797	33010	19019	11180
-2.18333	32631	33127	47689	33226	48583	32376	50193	31166	35228	27565	28787	28285	35453	30982	29340	29841	29547	32773	30741	12887	13303	13507	18981	19897	20735	35820	19330	19228	19181	17909	20664	25474	17983	30029	27252	29157	26355	26258	24656	26665	27373	28633	33870	24457	35084	33890	33596	18617	11627
-2.1	32549	33323	46992	33218	49160	32496	49994	30852	34676	27909	29051	28414	35251	30814	29427	30449	29911	32805	30985	12940	13439	13425	18737	20249	21087	36577	19264	19452	19655	18019	20847	25512	18233	30210	27730	29565	26149	26417	25550	27078	27187	29033	34043	25000	34636	34160	33296	19062	12036
-2.01667	33003	33093	47460	33570	49607	32930	51087	31031	34855	27639	29112	28644	35475	31184	29644	30232	30243	32486	31186	12990	13604	13304	18912	20433	21150	36801	19406	19718	19662	18175	21091	25618	17881	29984	27943	29525	26452	26437	24920	26800	27933	29107	34210	25231	34484	34259	33460	19827	11707
-1.93333	33063	33328	47452	33112	49415	33404	51086	31040	35082	28265	29217	28427	35279	31702	30071	30688	29591	32703	30986	13302	13394	13643	19122	20367	21110	36697	19747	19564	19944	18173	20929	26222	18437	30218	27616	29569	26523	26372	25322	26984	27674	28942	33788	25161	35434	34535	33677	19802	11885
-1.85	33439	33738	48025	33570	50416	33177	51645	31339	35840	27710	29139	28214	36053	31455	29984	30399	29485	33329	30814	13095	13801	13462	19208	20654	21295	37107	19799	19578	19861	18060	21019	26124	18396	30626	27741	29594	26997	26791	25112	26870	28125	29156	34051	25658	35882	34596	34003	19471	11636
-1.76667	33493	33316	48358	34122	49812	33643	51501	31175	35272	27930	29475	28887	36014	32093	29952	30870	30025	33025	31037	13055	13549	13500	19218	20908	21516	36952	19872	19463	20002	18548	21066	26438	18359	30545	28378	30151	26987	26508	25396	27298	28110	29346	34056	25461	35088	35077	33817	19420	12121
-1.68333	33201	33825	48752	33617	49792	33207	51543	31280	35255	27750	29344	28568	36057	31378	30304	30789	30013	33333	31904	13480	13761	13854	19208	21064	21734	37817	19939	19902	19922	18545	21078	26132	18922	30398	28389	30000	26906	26717	25408	27071	27946	29074	33740	25611	35450	35375	34329	19886	12086
-1.6	33287	33679	48498	34247	50281	33261	52241	31445	35453	28301	29372	28995	36404	31377	30568	30711	29989	33221	31759	13262	13858	14013	19687	20999	21348	38165	20206	20131	20236	18387	21493	26443	18779	30838	28160	29850	27029	27283	25238	27343	28174	29432	34188	25655	35966	35330	33998	19818	12420
-1.51667	33605	34224	48375	33901	50043	33196	52034	31534	35480	28597	29853	28459	36484	32575	30525	31319	30199	33157	31947	13311	13776	13976	19835	20997	21718	38152	20579	20143	20433	18485	21615	27078	19060	30591	28219	30176	27481	26919	25525	27605	28437	29711	34799	25747	35856	35434	34801	20437	12169
-1.43333	33336	33888	48855	33822	50620	33514	52386	31235	35545	28606	29455	29135	35966	31630	30341	30856	30568	33362	31464	13676	13932	13999	19536	21224	21703	38311	20560	20068	20173	18562	21377	26806	18899	30836	28281	30225	27425	26968	25609	27610	28512	30054	35133	25850	35743	35288	34366	20470	12405
-1.35	34024	34024	48893	34336	50935	33380	51989	31570	35841	28270	29604	29358	36435	31570	30533	31514	30620	33556	31941	13696	14110	14094	19924	21539	21861	38134	20491	20082	20338	18364	21570	27242	19380	30839	28019	30453	27667	27605	25630	27927	28160	30405	34612	25985	36410	35551	34164	20329	12301
-1.26667	34048	34340	49613	34230	51147	33400	52522	31833	36065	28386	29819	29092	36467	31428	31019	31276	30672	33832	31901	13973	13876	13877	19878	21712	21473	38568	20191	20175	20369	18634	21734	27103	19224	31450	28225	30944	26873	27466	26067	27904	28686	30289	35190	25606	36232	35764	34927	20677	12685
-1.18333	34289	34406	50319	34502	50725	33988	52910	31781	36120	28506	29365	29359	36756	31923	30870	31351	31139	33358	31829	14014	13977	13993	19787	21509	21859	38945	20481	20344	20798	19394	21993	27606	19143	31417	28522	30558	27315	27617	25632	27872	28037	30542	34736	25405	36452	36296	35035	20334	12627
-1.1	34259	34184	49243	34360	51173	33982	52476	31991	36557	28791	29598	29074	36729	31639	31372	31250	31221	34168	31979	14092	14274	14279	20270	21239	22303	38884	20978	20772	20637	19003	22146	27173	19576	31490	28618	30931	27703	27761	26391	27839	28794	30007	35680	26253	36288	36191	35109	20509	12840
-1.01667	34446	34454	49499	34106	51715	34190	53433	32059	36133	28508	29795	29240	36657	31784	30732	31241	31130	34216	32262	13863	14215	14400	20337	21987	22190	39274	20666	20469	20544	19579	22399	26866	19776	31542	28726	31012	27963	27496	26143	28372	29041	30712	35373	26214	36505	36058	35787	20949	12839
-0.93333	34178	34549	50505	34770	51673	33744	53018	31795	36310	28733	29874	29076	36650	32004	31064	31650	31250	34427	32757	14029	14316	14627	20010	21634	22289	39456	20927	20661	20994	19400	22498	27564	19672	31710	28937	31257	27695	28470	26053	28299	28604	30987	35454	26487	36961	36317	35275	21123	12798
-0.85	34280	33918	50112	35039	52265	33850	53851	31974	36426	28684	30293	29465	36571	31813	31056	31391	31063	33795	32601	14211	14414	14419	20201	21818	22645	39356	20936	20258	20872	19294	22443	27941	19638	31628	28943	31305	27506	27702	26453	28576	29293	30597	36139	26454	37514	36572	35677	21074	13102
-0.76667	34612	34978	50383	34674	51943	34392	53628	32235	36513	28628	30232	29419	37037	32350	30781	31812	31977	34465	32745	14465	14499	14363	20379	22405	22391	40468	20802	20540	21341	19408	22145	27719	20240	31547	28972	31446	28184	28219	26058	28615	29211	31344	36190	26420	37242	36342	35807	21045	13010
-0.68333	34167	34708	50104	35073	52208	34263	53605	32309	36848	29049	30309	29696	37107	32552	31356	31680	31492	34985	33299	14417	14277	14397	20597	22142	22529	39896	21235	20754	20867	19632	22538	28237	19940	32131	29327	31262	27950	28510	26570	28287	28925	30920	36004	26687	37603	36703	35633	21161	13125
-0.6	34599	35175	50606	35265	52973	34053	54584	32048	36608	28744	30364	29832	37122	32546	31084	31935	31709	35217	32800	14273	14643	14576	20380	22079	22828	40428	21086	20877	21588	19685	22468	28020	19906	31682	29079	31369	28556	28278	26313	28616	29283	31126	35749	26956	38209	36771	35539	21405	13120
-0.51667	34230	34826	50529	34933	52593	34267	54189	32442	36823	29073	30584	29935	37004	32920	31513	31735	31658	35145	32824	14661	14646	14549	20632	22589	22813	40464	20992	20928	20992	19886	22691	28308	20059	32170	29251	31532	28609	28619	26489	28653	28842	31087	35770	26435	37773	36596	36461	21925	13252
-0.43333	34534	35162	50768	35060	53009	34504	54498	32651	36459	28746	30852	29720	37392	32526	31448	31863	31480	34955	32998	14622	14829	14241	20416	22184	22396	40947	21324	21230	21497	19779	22877	27850	20248	32178	29313	31790	28531	28490	26867	28809	29520	31364	36108	27092	37720	37253	36211	21600	13212
-0.35	35072	35098	50874	35369	53138	34914	53484	32635	36986	29401	30246	30101	37468	32746	31771	31798	31393	35443	32556	14444	14734	14806	20682	22846	22797	41255	21383	21274	21857	19867	22545	28327	20149	32475	29716	31945	28531	28490	26679	28805	29621	31298	36585	27113	37771	37309	36507	21562	13317
-0.26667	34763	35278	51392	35159	53645	34696	54345	32616	36717	29169	30425	30319	38033	32651	31820	32074	31483	35175	33370	14594	14956	14552	20564	22711	23438	40807	21456	21125	21672	19972	23134	28621	20801	32303	29565	31895	28616	28674	26390	29183	30004	31641	36611	27101	37681	36942	36254	21147	13543
-0.18333	34738	34695	50679	35737	52414	34806	54692	32897	37009	28930	30780	29904	37903	32803	31613	32852	32395	35735	32945	14846	15082	14717	20863	22724	23214	41089	21629	21549	21641	19942	23175	28527	20558	32602	29480	31532	28996	28440	26799	28762	29744	31679	35938	27065	38058	37449	36170	21866	13520
-0.1	35059	34995	51412	35081	53426	34670	54441	32670	37248	29318	30914	29855	37446	33553	31982	33206	32165	35082	33201	14607	15056	15061	21061	22807	23208	41748	21497	21553	21927	19871	22982	28563	20589	32383	29523	31768	29021	28629	27035	28800	29601	31700	36735	27566	38526	37257	36529	21937	13630
0
0.13333	32014	32506	46838	32459	47885	32092	49670	32521	36343	29752	30575	29774	37186	32648	32171	32688	30539	34123	33145	14148	15761	14736	19984	24118	23850	42603	23259	22986	23159	21297	24468	29752	21893	33912	31100	32700	29827	29633	28268	30151	31373	33048	38399	29014	39566	39295	38194	23297	14835
0.21667	32052	32194	46493	32001	48440	32180	49218	33042	37117	29743	30294	30098	37152	32312	32209	33499	31003	34468	33263	14825	16296	15115	20696	23909	24154	42568	22728	22464	23156	20988	25013	29680	21969	33521	30718	32778	30043	29733	27849	30018	31451	32780	37957	28556	39487	39498	38357	23286	14958
0.3	31976	32411	46449	32406	48917	32454	49403	33522	37636	29668	30523	30242	36724	32969	32679	33430	31175	34498	33225	14645	16202	15294	20625	24111	24529	43211	23240	22996	23043	21335	24824	30448	22381	34111	30979	32954	29822	30168	28087	29656	31500	32567	38621	28525	39704	39462	38473	23586	15150
0.38333	32528	32757	47016	33129	48470	32227	50280	33447	37268	29598	30848	30285	37170	33537	32926	34364	31034	35022	34226	14692	16957	15388	20807	24130	24371	43418	23419	23405	22867	21227	25209	30602	22063	33877	30928	33261	29551	30095	28583	30134	31631	33077	38674	29286	39451	39618	38011	23736	14988
0.46667	32735	32579	47035	33274	49183	32637	49914	35878	37060	29638	30514	30722	37268	35451	33188	37073	31535	35048	38076	15164	16931	15540	21161	24582	24365	43542	23470	22885	23165	21152	24679	30551	22864	33881	31421	33586	30142	30428	27991	30223	31486	33405	38514	28993	39818	39881	38559	23843	15128
0.55	32822	33025	47707	32834	50078	32658	51232	40759	37571	29945	30892	30565	37136	40543	33248	43920	31632	35325	46769	15508	17537	16102	21255	24491	24873	44185	23451	23595	23698	22009	25314	30911	23006	34383	31630	33370	30110	30615	28324	30353	31724	33471	38676	29532	40153	40197	38216	24150	15224
0.63333	33031	32568	47798	33144	50301	32752	50998	49647	38034	30237	31085	30553	37659	49351	33705	57086	32281	35393	63576	15759	17479	16516	21608	25177	24801	44345	23495	23684	23643	23352	25114	30906	23102	34263	31609	33560	30523	31458	28779	31392	31857	33241	37970	28841	40509	40234	38743	24032	15299
0.71667	32963	33293	48096	33086	50137	32397	51924	63015	38321	30594	31783	30937	38323	63563	33534	76791	32267	35382	88275	16184	18002	16362	21908	25399	25042	44208	23814	23885	23530	26508	25269	30801	24626	34169	31567	33407	30587	33844	28923	33733	32167	33759	38668	29008	40448	40457	38561	24514	15810
0.8	34036	33422	48635	32878	50545	33053	52587	81177	38743	30819	31144	31080	38852	82190	34883	104144	32311	36403	118541	16527	18329	16987	21809	25817	25607	44565	24640	23707	23892	33075	25719	31785	26370	34622	32402	33702	30434	38914	29254	37716	32732	34185	39118	29104	40685	41014	39741	24296	16547
0.88333	34644	33583	49716	33677	51387	33056	53237	102198	39489	30717	31042	31925	39414	101748	36396	133795	32248	36794	155102	17499	18827	17252	23305	27527	26285	45314	26723	24705	24180	44093	25718	31590	30884	34969	32492	34725	31533	47432	29259	46060	32946	34917	40348	29899	41028	42317	40588	25048	18417
0.96667	35950	32969	51975	34213	53757	33074	55749	123269	41510	30675	31890	32978	40256	122625	38519	168701	33205	37767	190470	19028	19369	17562	24168	30107	27995	45278	29478	26051	24808	60954	26491	32899	38436	36281	33762	35906	31092	60081	29323	57715	34214	36946	41356	29868	41269	44441	42985	25376	21449
1.05	37739	33445	54464	34053	57513	33792	59011	143053	42925	31147	32090	34681	42220	145108	42178	203317	32851	38758	230941	21875	19735	18291	26760	34592	29875	46051	33560	27954	25210	81886	27686	33699	49778	37548	35524	37370	31635	77754	30133	76219	36188	39828	43761	30693	41690	48249	46263	25994	25794
1.13333	41052	34449	58224	35317	61465	34330	63743	164227	45914	31261	32979	37958	45997	163092	48315	237147	33594	40181	267471	26248	20098	19395	30841	40092	32979	45128	40258	31792	26832	106062	29152	35925	65719	39927	38850	40323	31733	100684	30980	97126	38747	43857	46940	31934	43101	53313	51792	27211	33617
1.21667	44450	35421	63761	35909	67715	35036	70720	181194	51079	31415	34721	41940	50537	183846	56350	268725	34536	43112	299375	32091	21083	21588	36679	49778	38194	46157	49296	37340	27954	132539	30994	38573	85412	43992	42894	45048	33029	124376	32677	121889	42989	50197	52356	34345	44820	61569	59487	28596	44656
1.3	50382	37126	71395	37285	75526	36171	78605	202781	58367	32182	36343	49170	57303	200232	67947	296227	35009	45522	335724	40414	22222	23828	46229	61356	46019	46314	61530	43944	29825	160541	34333	43160	106614	49514	49300	51623	34777	149115	33859	147115	49710	59704	60072	36502	47377	71481	69172	31438	59713
1.38333	56602	38460	80706	38617	84805	38007	88696	216156	66813	33276	38417	57595	65917	219346	82600	321025	37198	50868	363501	52339	23146	27255	57699	74228	55427	46313	75873	53686	33034	194896	38442	49311	130215	56003	57396	60055	35966	175719	36037	175825	57418	71631	69307	40464	51054	84950	81558	35081	76784
1.46667	64570	40782	90546	40304	95200	40276	99646	227402	77757	34197	41852	68258	77507	233563	101573	350144	38995	57055	378765	65694	25298	31628	72115	91409	67286	46608	93604	66781	36539	214796	42557	56831	154570	65459	67454	70252	38531	197530	39694	198265	67267	85563	80988	44836	56274	100161	95290	40213	95445
1.55	73196	43093	100939	42536	106840	42187	109090	238261	90183	35801	46383	80751	90990	244182	120413	371040	41736	65047	403134	82102	27881	37549	90301	106228	82312	47701	109420	80490	41703	245292	48335	67904	179731	76457	79567	83806	41339	223188	44152	224267	80272	102762	94420	51426	62905	113988	106707	46439	117392
1.63333	82488	45990	111278	45328	118387	45198	126020	249474	104033	38054	51571	94946	106316	255343	147233	392203	45653	75750	424722	102351	30083	44579	110428	128645	98413	47760	124897	96419	47738	264623	55504	79696	204803	89447	92612	98731	45672	244966	49751	248990	93766	120857	111666	58793	71561	132456	126347	55144	136383
1.71667	92338	49148	123780	48662	131886	48243	138171	264910	120760	40326	57806	108823	119329	265711	172244	406423	49564	86957	443781	122728	34640	53780	131569	149993	115936	49162	148144	111064	54800	284996	63790	93999	228091	104726	108124	114251	50073	269964	56875	275595	108964	141824	123079	67304	81559	149875	140280	65272	159683
1.8	102556	53343	133148	52755	145356	52424	146637	279742	137287	43650	65593	126520	136966	281692	197935	427715	55590	100993	464093	142718	39676	63754	155634	161882	131672	48935	166422	131393	63197	308657	72241	108695	241725	116353	125053	129172	56729	286724	64399	296902	125892	160254	141275	76910	93030	169903	154601	77054	179757
1.88333	108936	58128	147367	56637	157163	56411	160609	279233	149222	46678	73310	141573	152508	289532	230844	446955	62404	115673	481193	166456	45943	75900	176482	184161	148106	49228	186409	149304	73697	323565	82853	125253	269771	135258	137165	147678	63809	306023	73711	319231	138158	178092	157912	88048	105447	191971	169896	90311	197046
1.96667	119855	63377	158181	61627	166982	61037	174080	291830	166967	52260	83126	154497	167817	293995	251585	455048	70777	130477	489627	193676	52322	88356	196917	193873	167738	49914	200025	166760	83629	346128	93237	139614	285407	148400	149417	165606	70694	322433	83822	330234	157908	196333	176951	98810	117629	209246	183658	104978	217543
2.05	131509	67306	171437	66314	178218	66089	181415	304663	182501	56600	93268	169530	187418	305483	279574	474981	80767	152849	504745	209817	60282	104855	224140	215220	184134	50994	219464	183925	94687	355694	104589	158236	300798	166713	170339	179057	79806	334943	95654	349568	173930	214601	191180	109462	135272	224129	196800	117344	239048
2.13333	140317	72600	177851	71143	186463	71390	198165	309394	199344	62929	103775	189209	201488	313813	303350	480483	91453	168385	510386	236856	69291	117386	243610	232836	202259	51749	230181	198057	108225	368939	113978	172414	316236	180307	181812	201368	88755	352949	107705	364649	191730	237176	206672	120013	153126	239846	211626	134030	257866
2.21667	149594	78790	190968	77185	195255	76573	203201	315426	207558	69648	114779	202409	213764	317524	332564	492392	102667	193443	521156	253565	79644	138505	265852	247471	216253	52181	252434	216200	115820	386629	129143	192487	332857	197277	201539	209919	100293	367584	118550	382725	208418	254340	224833	134873	167141	255645	221498	148023	270660
2.3	157612	84486	200448	83340	208636	81459	214216	322137	225860	77475	123039	217289	226476	324409	354391	497117	112849	213219	534889	274813	91038	153711	287040	262670	230612	53438	261316	228506	130484	398945	140174	209505	347989	211249	211118	226688	109295	371607	130618	399660	222009	266358	234744	139967	186665	264808	236885	166384	286050
2.38333	168728	90273	209821	88441	220917	87652	226158	326786	240715	84606	136549	227234	241428	328916	377459	512852	125099	232679	543656	294373	102891	168160	305565	275207	245618	54085	274528	245913	144540	413354	151631	224744	358918	227336	225346	243853	119904	384341	144544	413101	234132	282748	252691	154516	198303	280620	244538	178865	299089
2.46667	172606	95347	216833	93714	226228	92966	231154	331039	247314	93684	148692	242133	253019	335109	400004	518369	140361	251292	558283	321210	111414	189045	323605	287200	263785	55238	286794	259009	157966	423890	160026	244007	372833	240672	236641	260221	130049	398098	157006	416933	250747	295572	266201	168960	213781	290946	255792	195012	314259
2.55	183942	101010	221534	99652	236722	98558	242563	331548	261382	102298	161011	256349	261846	346292	422769	536105	158343	276163	555686	331735	127542	202861	340128	297067	273900	55841	300647	270945	168309	435302	174512	256691	385526	249777	251365	271883	144233	406955	167901	425686	261170	312443	279087	178152	231387	307698	263623	213577	328922
2.63333	187925	107981	230727	104948	243947	104169	247455	335000	274074	108567	173720	261193	278424	345476	438457	530879	173309	299756	572537	349036	141024	225667	361576	312676	287249	56866	307284	285613	178231	436334	185757	273178	390437	260644	266863	279082	152291	415828	179162	439113	276034	326925	295369	185464	246733	315235	270899	225312	337361
2.71667	196858	111897	238752	108997	246765	109317	253234	340369	284966	118955	189513	272998	285637	350731	451805	541927	188594	314812	575799	361295	152040	238403	375682	320305	296294	58267	322408	290791	191534	450272	196116	284884	397724	277196	273674	296286	162538	421020	192689	442398	292059	335764	299643	196414	260403	328154	281559	240992	348571
2.8	199196	116857	242448	114988	252417	114225	262216	345030	294454	125554	197602	284735	296643	355721	475142	552434	204547	336801	584093	381241	166420	256749	392911	325167	310045	60188	328665	304434	202703	448971	206543	294550	407048	284921	284305	303102	172660	433926	206410	462577	296527	347413	314051	206524	270280	341276	292743	254178	360604
2.88333	207065	121461	250166	120688	262587	121285	272225	355067	302429	133608	207158	291776	310579	359411	489469	559504	219313	360865	580340	392166	178676	275225	403406	342058	318115	60748	332590	318721	218148	462068	215770	310698	416616	295771	292212	317833	183180	434175	215213	462904	311942	356885	326615	216441	286118	344589	298723	268363	373798
2.96667	210808	127861	259103	123567	267635	123874	275400	355509	313734	142609	218420	306540	314594	360536	503540	567625	229635	371032	592032	397651	190294	290424	417663	348900	333712	63036	341374	322293	222912	470758	225027	321016	423628	309599	300529	325798	194691	446102	224303	463884	324055	368165	338521	225829	298342	357343	302746	277380	380288
3.05	217642	129205	260202	129457	270249	128241	281039	362666	319135	151258	231460	312562	324915	364768	516987	555224	248915	388203	593865	414876	200193	306895	430634	356040	339152	64949	349474	333678	230659	477930	233302	328909	431066	314282	311847	333771	204641	452699	239310	473189	328754	379519	344576	228973	310397	362402	315737	290082	387763
3.13333	221987	138555	269702	137185	283823	134316	286901	359942	331770	158529	238094	325584	332521	370718	526555	561322	265082	402858	597631	428799	219307	321900	441794	363450	347481	66203	357161	340898	248113	475630	243775	337048	432258	325174	318984	338882	212549	457363	245678	480978	337575	386674	355478	239209	325009	374915	316575	301923	400424
3.21667	226118	143363	271128	140931	283013	137648	292793	360654	334724	165341	248117	326783	339513	370734	540752	573780	278673	418558	602745	438866	230062	333196	457584	373857	354602	68257	364722	349713	251834	481913	254089	352347	440696	330673	324867	356971	217926	462237	257966	481015	346108	394493	355846	246646	328993	376800	330436	310321	402557
3.3	231460	143580	269620	142912	287121	139967	297002	363465	343340	171828	252339	334668	346672	373122	549001	580578	288419	438774	605600	446768	237384	344541	471030	377633	361430	70246	371974	357523	259901	481305	261980	363190	448411	337954	332543	355904	232004	461447	267411	483252	359710	405302	366777	251854	344782	386752	336122	320623	408092
3.38333	236290	148586	276367	146044	293231	145859	299064	364261	351086	182078	267001	337636	357932	377999	563177	580761	302331	453744	612155	457331	249556	364516	477486	377478	369774	72860	371345	362002	269894	493791	272926	370060	450651	344878	338241	360058	238641	464064	276831	489058	360559	405219	369220	262877	354575	391184	337848	328755	420342
3.46667	241721	151282	282726	151869	295883	146971	302030	366478	358825	191177	272185	349195	364880	377287	576369	591648	315059	461541	617096	467028	263670	378826	481654	389287	373850	75238	378143	363916	276757	488678	273593	383435	457502	349536	346133	367170	245406	473134	278981	499931	369617	417198	380536	273386	360659	399758	341522	341982	421155
3.55	241162	158001	286017	155864	299148	148394	304826	363893	360494	200070	281498	355281	370279	378379	585201	587302	329451	480282	621010	471028	273239	388768	496422	394342	383406	77377	386446	370611	282701	493944	284687	391924	462687	354086	356570	375093	249104	471976	287987	501958	372866	420449	382761	276361	364926	403638	347150	350566	427959
3.63333	246283	162908	288542	157062	299758	156532	311512	366899	370008	200742	294695	361329	375892	381130	588485	589289	337348	488809	620529	472420	280171	402925	503996	394386	381532	80037	386414	380891	293771	499408	286565	391433	465428	359890	354963	385286	259540	481458	300433	501410	384979	429761	387584	284832	373340	406166	356223	359338	432757
3.71667	250324	161997	292236	160476	307698	157642	312614	375324	378633	210870	298766	360015	373396	384210	594955	590894	351142	500798	626824	486159	290012	400376	510927	400535	387494	83086	386502	388094	298810	505276	299182	400151	462964	368059	353454	387366	267762	478189	305383	507614	377529	433397	398633	290319	386579	410543	362925	368617	434160
3.8	251965	167299	296995	160566	309653	159068	317050	378226	377921	216052	306887	364235	388083	380907	607207	593041	362114	517602	628648	495395	299957	417959	517394	403666	397968	86867	397901	393463	304876	505666	305279	409135	469888	370948	367189	394141	273444	482653	308624	509539	393623	436502	399164	298312	392237	415410	359806	372948	437855
3.88333	255963	168402	300490	168770	315373	163448	319488	378052	385056	227020	308644	376181	393058	386381	618193	598009	370528	516769	624697	499449	311072	431510	530177	409556	403015	89495	398268	389609	314007	509002	312290	413069	468352	375164	368314	395146	285004	486536	321309	513935	396924	440162	406844	302900	400456	426499	371082	384050	446960
3.96667	262132	170837	300180	169380	314737	169546	317551	378878	390683	227770	320452	375898	399951	385994	618341	598038	379641	528286	625595	503886	316827	439221	535735	411048	404688	92876	403673	397781	317339	510568	313114	416004	479248	379167	369414	403963	294260	486040	323344	517468	395616	444810	409553	302477	407518	425197	371349	387725	444801
4.05	258029	174830	306220	170189	323753	171755	327061	375641	394423	230654	320787	374410	405369	388485	618823	602631	391859	542329	637534	513712	326834	446131	535283	409456	408021	96216	405961	400539	322220	511130	322945	423296	474038	385179	369289	404232	297798	493412	328006	517209	401382	451486	407431	305535	411639	426350	380159	396985	445054
4.13333	258988	176475	309967	174512	324899	175337	323515	380828	404234	238263	326680	384493	403885	394195	631801	608737	399190	551920	629572	509147	339061	453677	544759	413920	410657	99495	413106	405290	331218	514434	325589	431242	491129	387421	379361	408880	297836	491650	329205	518350	406059	453341	413512	312861	418130	430640	377097	397946	454202
4.21667	267700	179943	309665	179809	319078	176244	331086	380217	400585	247241	333281	382298	406632	394827	638135	608089	417922	568941	641077	515806	336627	463491	554182	417572	416900	103036	410252	410420	335928	513216	330727	433606	482840	392714	383291	415720	304321	494649	343295	518511	408713	455660	413513	315848	420965	437087	378394	401949	451298
4.3	266964	182987	314619	179211	325354	176808	329373	382889	413727	250518	341663	387716	412049	396237	636065	605089	417722	575456	634599	523093	351999	469412	563492	424403	416651	107367	416089	412543	334480	525097	333578	440162	491440	394591	383902	412942	311631	499753	339120	523919	415851	459297	419105	319490	424834	435173	386327	407816	451129
4.38333	268467	183708	313117	180836	330988	180515	332893	383519	411235	258716	342454	391344	416380	396987	643238	609064	428860	577153	636039	528663	350690	477902	563254	424566	416844	110382	415248	413577	344860	521988	338759	444952	486018	399335	387930	421533	313608	500388	353937	525036	418170	461145	419175	327606	432686	436578	385354	416533	456797
4.46667	270542	180408	319103	181782	327773	178409	335214	388524	415673	257552	353166	393503	422859	400404	646424	603846	429776	579318	643650	532974	367658	482624	573591	424880	422881	112121	414249	417206	343979	526037	342938	440999	490025	395720	387768	425233	319990	503854	355369	531479	423037	460937	421037	329461	433667	439827	388811	420839	462912
4.55	272245	188334	320736	185542	331774	183798	334982	390157	427767	264250	356009	399545	430738	402970	649946	609033	444614	593070	644466	535154	369063	491451	572955	429319	425835	115506	419088	417976	348317	526292	347173	454397	488002	397579	392780	425386	318616	510819	356089	530619	420767	472074	431614	327617	439574	444677	389038	427488	463582
4.63333	274644	188900	316732	186186	333699	185380	336506	389572	417177	265665	356093	400731	426101	404697	655095	607655	450515	597535	643141	543543	379988	493812	575732	430546	427972	122677	419800	420201	355311	533249	350485	452282	491762	397541	393247	430927	327039	505647	363995	536265	426366	473331	433485	332523	440004	447377	399180	428801	459517
4.71667	276275	195397	322701	191245	336206	187613	340907	390183	428498	268168	361679	400652	429941	409327	656406	614503	459660	600784	645510	542846	387172	497718	585522	433606	421442	127006	421839	418067	358225	530671	358196	458656	497825	402165	400136	432330	328066	508663	369538	537871	426376	474383	433273	336743	441675	450299	400403	434231	468454
4.8	276357	192748	323272	189725	342821	188934	341947	392012	434558	277192	368204	403435	430390	404155	661502	612085	461132	609571	645872	545965	387109	505508	590063	436074	429987	130566	419444	420208	366648	533408	360211	463273	494911	404398	398336	434698	333852	512430	369788	541646	432195	480086	432581	344633	448812	448904	400393	435619	468303
4.88333	277242	199255	325434	194694	337777	191095	344808	391340	434533	282339	367751	405915	438751	400972	671174	620204	469990	614733	646166	544375	393456	507323	590787	433181	433725	133524	424167	421674	364833	536259	364973	463806	499026	404172	396622	436933	335688	509671	370385	542611	431994	482833	433226	347722	451520	456178	401785	444519	464429
4.96667	278135	199008	326889	196636	341256	192601	341116	392883	430202	282147	368777	403668	440310	405170	671917	617569	479665	620717	645647	545018	405389	512401	600182	434649	438136	138072	429624	424237	368761	546392	364368	459487	500693	410124	403686	444229	340196	512919	373237	538777	431770	479997	433537	347277	449569	448469	408479	441592	469312
5.05	283058	198000	324799	195824	349178	197575	344552	395564	442511	286475	368917	411345	448735	406053	677733	619409	483509	631167	647983	556860	404963	518588	598646	442130	437825	140823	426010	429037	378954	540710	372956	466617	501258	418606	403804	442572	343840	519475	374749	546125	443468	484672	440232	349605	454585	456599	410939	450654	473840
5.13333	281595	197897	330768	201330	340156	196087	346956	394663	445204	289215	375075	410892	445550	404573	669435	614882	486329	623305	646736	551888	407652	523420	601063	441005	435584	145091	424859	431184	371346	551863	372819	471563	506629	409788	409226	437359	346631	515775	379749	546008	434681	495384	439881	347745	457680	458818	413326	455549	475309
5.21667	288458	204624	332199	199603	345896	197472	344644	397128	440680	294696	379695	417093	446893	406742	677335	623047	494132	626323	647563	556714	420665	525039	608400	443660	444070	149750	433052	433754	379362	548404	381326	465251	504188	421682	411630	446766	346767	514057	383598	551574	433065	488448	434532	357002	459571	455734	410296	454396	472092
5.3	284267	206507	329689	199394	342133	198354	350180	392405	443915	301174	385482	412237	449884	406244	672018	623380	500431	636285	655197	559113	418630	533365	613064	442945	440787	156127	432621	429888	382981	542803	375556	471719	505606	419647	411538	445824	354533	519681	387859	551564	440248	487533	449547	356971	463685	459348	417946	456737	476550
5.38333	286312	205538	331658	201979	341957	199216	349166	397204	449412	297684	381878	419181	458729	409188	675501	621225	503849	642220	652761	555267	424951	535028	614915	442522	440895	161333	432411	431693	386574	551517	379855	473198	508025	420048	404334	447965	357567	527239	387624	552839	445200	489086	445167	360123	469640	466991	419922	454224	481401
5.46667	290813	205291	333071	199875	349861	198929	354348	402878	449568	304282	383871	417696	464531	415879	681870	625482	510624	646770	651703	564391	426297	540435	621719	448507	441578	162045	436244	435367	389119	548183	382370	480178	512167	421432	416068	452948	360378	527117	388220	560974	441876	496684	444602	362040	467268	465329	418652	460793	481927
5.55	291029	207851	332813	204689	350052	198077	352983	403901	450763	301886	387347	422443	454248	409142	683264	622393	509552	651436	653454	566243	435643	540704	621610	453894	443522	166778	430169	430788	387911	550311	384524	481438	509037	423700	409999	448619	360909	526812	389665	551442	445618	503612	442723	369574	468409	468122	420258	459163	490450
5.63333	290449	208599	345823	205332	351405	204387	350184	393085	449272	305956	389960	423973	463569	406963	690661	625398	519994	656041	652901	563574	438247	550665	619046	448273	448619	170514	435051	435840	388644	551889	388040	478632	513534	427159	416227	450055	357646	525507	396418	558466	439819	497946	447696	367870	473266	464823	419660	465340	485912
5.71667	290764	208153	333579	206623	352665	201743	361277	395100	455180	311598	392239	423952	461418	412852	682974	624166	516334	651059	655517	566235	436612	546695	622536	454411	445318	176962	434246	443181	388038	552456	388422	477189	517985	426619	419138	455100	361141	527261	393759	561431	444214	500296	454503	374159	474096	468093	424625	462414	483027
5.8	291803	205159	337825	210709	353943	208077	354224	403057	453586	311871	398219	423370	464561	413553	686924	627261	526539	652874	658942	577964	443260	551030	630460	447650	445826	178501	438794	438161	395420	562949	392011	484456	514899	425668	415590	454623	366953	532006	397036	556607	449386	504760	451630	374387	475034	470326	427468	471645	490778
5.88333	294355	214089	340326	208197	353229	208347	359183	397535	455179	311164	396857	424572	467069	413908	692950	625562	526742	664066	658930	570095	442948	552547	635481	453451	450723	182855	443427	437040	401838	554840	390917	486932	516840	428838	418142	459884	365638	537286	398242	562222	453508	506366	451264	377034	480435	471378	430556	473574	489732
5.96667	293591	211505	339540	208961	352979	206930	359890	402309	459748	318957	399409	426710	471463	413526	689994	627581	532877	665077	658312	572265	448815	554174	629426	460396	446418	186056	442558	441116	391221	558550	394328	487954	516633	434880	419859	461473	368357	534213	403214	564128	451114	499737	452702	372399	472725	473122	430054	478965	488187
6.05	294588	216700	341167	211206	350233	210363	361720	401833	460316	319837	395521	425552	470745	411649	697453	628010	539172	672495	650429	572472	455664	556657	632900	453022	453021	193967	439467	445222	400181	556574	397854	496837	522372	424733	420076	460511	372649	533344	404211	562764	455281	505613	456741	377346	476804	479630	428979	476011	490104
6.13333	298638	218532	341123	211153	357437	211263	357427	400144	464066	319879	400650	428923	470445	416712	685744	626840	541270	667352	660970	577127	456246	559243	638980	456313	455958	199217	448412	443135	403727	555915	398965	494071	516520	433619	422983	468752	368765	534477	402638	569418	459078	503755	454722	378197	483134	480960	420892	471645	491583
6.21667	301875	213935	338840	210135	355180	212112	365045	401302	460629	322980	403132	435688	465383	412584	692767	620786	545547	676514	667400	578311	460075	563024	636466	455630	453914	198842	443104	451879	405013	563518	403042	492011	527064	433778	423914	466037	376171	534113	407371	562861	454440	504480	459827	382331	482122	477973	434052	479383	495463
6.3	297634	213535	348742	211088	356821	216688	366252	402406	472095	324948	400609	434963	478541	416091	689807	628406	542492	669896	659878	586464	461278	564158	639928	458394	456160	202777	447863	447789	405933	557160	402262	496868	525682	428855	427559	469811	371465	538326	409738	567366	454053	511828	466644	382382	483428	478135	435253	484216	495077
6.38333	301744	217167	348663	212576	364534	213894	364473	400990	463576	324645	404058	433555	475066	416908	691424	634405	545485	679459	659891	584040	464906	561958	641834	461604	456790	206816	449563	446617	401107	567448	398229	494675	518778	433324	421103	469323	374888	547619	405833	567800	453682	507508	459384	382325	486473	473705	437375	482415	495585
6.46667	304480	217654	343909	210168	356600	211930	363359	400560	470423	324301	406982	435280	473773	415504	701957	629240	549372	677220	658167	582783	465040	568258	639239	457508	457816	210637	445526	448877	403702	564001	403840	500727	524372	435223	425499	474200	379460	538318	415517	574696	458261	515370	463256	387979	485127	476884	443499	482489	494722
6.55	297909	217938	343609	219269	366074	214844	366466	395236	474526	329644	407445	436784	476529	418469	700084	630011	556061	677898	657254	581236	472320	565503	641243	460269	456209	220584	442795	452736	410850	566505	409048	502372	525783	434711	429616	472132	377875	541198	413543	571619	460859	513757	461690	385205	490581	484572	441481	482038	505655
6.63333	300184	218226	345703	217511	363751	215210	367839	400773	467465	330548	409801	432968	479331	411924	699749	636127	549234	683803	658128	579338	467571	569911	651257	464993	464605	223006	453646	449727	405905	569099	407937	497462	527466	439808	424012	469874	377541	547787	415316	569571	458094	514365	467182	387217	488599	484798	440042	489819	497558
6.71667	303303	219136	351833	215852	357222	216847	363548	399018	471230	330251	411564	439545	477645	415339	695829	638876	557865	673456	656155	585870	476667	578049	649618	464482	461224	222109	450228	451382	406123	564211	411942	506321	527107	439781	426302	471460	383630	543985	410815	569098	458801	519512	468981	391425	490601	478498	444702	487641	498078
6.8	304996	216342	344845	216801	364025	216607	368482	402394	473749	338751	408928	434529	475335	409101	705260	632329	561359	684223	654627	590564	473300	571305	649616	462942	457061	226853	449161	459280	410455	574044	408287	511030	526083	440799	429570	469451	380060	541744	410537	574325	466097	516306	466005	389362	488641	481037	449819	488971	496774
6.88333	305429	223404	347092	218188	362120	213975	363100	403420	473263	340033	410637	434004	485300	415977	706713	633153	569995	684084	659151	590066	477684	569159	648019	466247	467671	230736	452225	456009	410580	563956	407444	510225	532710	438047	431286	475614	386803	550368	413531	572835	463718	517988	466782	393931	490678	487748	451613	488697	508452
6.96667	305601	218501	356115	219762	367228	219485	368170	406793	473029	336490	415389	440239	479279	414543	699120	635181	568497	688537	662480	592186	479303	580479	652354	469783	465752	232668	451291	453937	411219	568634	404377	504281	535945	436524	440001	478646	390163	547186	419221	576895	469652	515908	466173	387663	492940	488333	440298	491297	511265
7.05	305223	219865	350907	220238	362727	215079	367529	405022	474569	340467	418108	444017	486388	422844	703658	632040	569312	685216	659756	592468	483727	575183	653428	467483	465414	235727	455837	454452	411520	572750	414651	507508	535629	440435	428218	478337	389855	546924	412741	576533	469881	526463	465720	399052	491644	485248	445980	492377	501688
7.13333	306265	220541	351467	222016	368952	218682	366906	405660	480859	340482	412549	441858	485646	414946	701059	629000	570490	686435	664256	595221	481836	581118	655096	463032	461174	238632	457503	452442	418105	567512	415061	513090	532870	440520	431429	481409	385871	543401	416835	579015	469886	526082	468947	397679	497873	490538	449266	494511	504380
7.21667	303140	219546	355623	217208	370051	212804	375807	406120	476792	344206	415873	440094	483168	417573	706957	624922	572031	692423	662063	591524	487442	582377	655876	461676	467435	241886	452085	451968	416859	567091	412175	508159	535848	444151	437291	477863	389395	545267	417416	578506	462395	528843	468818	396256	501796	489478	454418	496366	504003
7.3	305656	223363	349112	222273	366200	215459	369099	405731	481678	342630	414315	451571	492742	416543	705100	632567	569478	690591	658754	598337	491466	576259	660942	471311	468318	243965	454540	458365	415256	563965	419230	509152	532758	443294	433012	478627	393721	550744	418914	579054	464218	528075	468702	403698	505582	489707	449787	497602	507440
7.38333	298779	224617	348939	221217	363669	218776	371204	409170	472896	338381	416305	446162	487208	419711	706338	628214	569067	696712	657364	591313	491049	584605	664877	471825	466994	246196	455041	458475	417175	575350	421990	511671	534002	447005	435472	483212	388106	551611	425775	578665	470322	521794	471453	400695	502184	488831	447924	498838	508966
7.46667	307211	224906	351283	219637	366663	216022	370166	403063	478989	345473	414369	442426	480734	418530	713662	632795	575105	696021	664414	593675	500402	583884	657444	469745	467176	252552	454781	455414	421058	575472	417367	514833	532416	445970	438750	482163	394633	547417	425185	574538	472845	528209	471735	402290	497679	487374	455418	503248	505530
7.55	303766	224174	353771	223340	375198	219819	374861	404361	479536	350162	420701	440076	483592	419645	713991	626611	573445	691625	661933	593092	485624	579154	667474	465532	475089	256318	454492	463306	417808	576987	415673	513590	539443	445683	434755	481439	397409	553625	420030	578228	469057	527876	470852	403813	501643	488422	452946	505539	508706
7.63333	301122	223228	355490	221418	372891	216648	372638	406000	483220	349060	416791	443498	493769	419147	712905	631512	574795	694246	662549	595165	491557	585006	668250	468408	464868	261883	453003	461783	419472	571979	418305	512962	537055	447706	437781	484763	397973	545147	421977	575862	471830	527944	471204	404123	503499	495615	457327	502570	504863
7.71667	303981	225452	355096	225117	375531	221184	369177	401539	483227	347097	420541	448188	484156	416777	708249	629218	576220	696097	661840	595668	489521	586327	664568	468587	473614	261032	457397	462394	418517	580360	420037	510627	532632	442156	441180	481600	392039	551632	428399	581655	470283	533914	476698	405938	504917	495527	457609	505173	508752
7.8	308187	226432	354598	224020	369900	222489	370490	408662	487940	349299	421449	440221	497191	416842	707904	633382	581204	701921	656556	600300	494476	588762	667297	476062	467996	265639	459342	458639	422851	576199	425084	513866	535488	449416	447290	485081	395660	557797	423941	584925	467120	532473	475306	406523	505340	490292	458577	509635	509446
7.88333	307792	222258	355012	222523	373135	221020	373654	401566	486093	344214	421654	444504	494008	416498	711506	634776	583992	699244	658908	590647	493183	594228	679212	469593	473168	267508	457817	462570	422634	569648	413982	514469	534684	451382	445589	490411	397761	551238	428821	579727	468208	534710	473001	403224	505498	495424	463244	501790	516192
7.96667	312108	226123	359582	225304	369842	222648	376606	402086	482421	347751	425822	447499	489245	422802	705864	634193	586038	704425	660145	601656	495839	590864	676050	473761	474334	269726	457715	461324	424262	578584	416979	522342	532320	446894	441787	491264	397769	560711	422400	583039	478337	532929	471099	406457	509727	495593	464195	506441	514404
8.05	307058	229339	356051	225869	370315	219812	373360	402847	483959	350716	427368	447474	486175	421201	709730	627898	590460	702448	656876	590596	495843	594083	676160	466762	476019	270200	457216	459043	419204	577121	414468	521908	536402	452950	440163	490311	396527	552715	422201	581790	478124	533532	471952	407350	503226	492516	463518	508618	516609
8.13333	312276	227009	359102	225806	376086	221211	375512	404760	484316	354626	424584	447885	498178	419597	704073	632204	590630	705341	653618	595772	491453	594113	673795	475462	475902	276921	462101	461832	423503	574963	421407	518373	535343	442623	446834	489781	398832	559023	427271	583364	476150	530042	474328	407834	507417	492700	462393	509340	512796
8.21667	306895	229977	352737	225193	371459	226112	378548	400363	486353	351643	423432	447901	501038	416711	709892	626414	589552	697479	664183	599293	503555	593592	677452	475812	474778	279430	462450	465782	420324	574351	425243	520317	540994	448049	439645	493783	400086	555782	427726	585912	480403	526000	475899	416556	506890	499843	463725	508549	519530
8.3	306365	228237	355810	228228	372209	224306	377484	406851	490008	351425	425582	447116	497583	418584	715312	634484	589559	697340	665208	595115	503594	587556	674192	476568	467642	281476	463713	468166	425616	574853	422268	519647	532838	447923	442266	491243	394837	554025	426671	586126	471676	530161	476010	416897	512960	499393	466091	508737	513705
8.38333	309239	226914	355956	225310	370014	226979	377084	408132	484867	348184	422753	443806	494399	415591	704991	624075	594615	699477	655057	604262	507961	598626	669587	477538	466839	287677	459538	467816	423258	581926	419661	518589	542317	451730	439598	493820	404629	556910	430142	579128	481752	538569	477942	414677	503039	496257	464392	508474	515669
8.46667	309088	224674	356268	225791	375322	221245	380142	403447	490694	355949	421778	447233	496102	419142	715139	630662	600091	706642	657785	603244	500851	594588	674669	473973	476398	286801	456368	464886	419614	577237	428200	520441	532457	453119	445449	493745	397824	554660	427286	585707	479657	534776	477549	418633	514272	504418	468244	508965	516031
8.55	308579	230678	358718	225742	372616	222006	379185	402848	486459	355688	423537	447781	498180	417312	717122	634127	597595	704501	662220	601525	508306	592507	674520	471201	475336	289672	462167	471040	423180	579820	424666	524306	534313	453179	443887	496173	399223	552001	432809	581907	476330	540074	477228	415596	511633	504708	460706	509996	514590
8.63333	305726	224751	356859	225624	376599	223426	375394	397470	489620	357263	423596	451052	493107	416958	709084	624991	592618	703568	659622	596988	504301	596745	678699	475971	474587	289509	463348	462811	425337	576117	426264	526551	542836	451609	441549	496343	406297	561228	434397	587788	475489	537134	478628	414033	514391	505354	462795	510601	516655
8.71667	308832	228471	357541	227477	372375	223564	380343	405242	485347	352038	429116	448176	501514	415119	709701	628570	597530	702136	656197	603885	513913	596109	668151	468076	471026	293755	460546	461179	426902	575447	429778	521027	539278	453048	440791	493419	399768	556051	430750	588047	482125	538107	480467	413134	521511	502691	467714	515362	519604
8.8	304649	228473	358721	232343	376243	222893	370853	400951	492604	358034	427179	442940	494833	418458	711405	630852	596030	707303	659561	598772	509509	595481	678189	479419	471244	302241	467150	463435	429407	576319	429279	522946	536408	450431	439643	490400	401331	554004	429581	587643	471655	536560	478745	423981	512288	504463	464341	514356	521657
8.88333	310887	233870	364338	227975	379820	229837	378760	403352	484895	359639	427947	449085	499297	420735	712081	626227	593118	703529	659136	603834	512412	598346	681616	473250	478290	300671	461895	468960	426873	578226	425733	527187	539754	456647	452243	496198	401482	558283	438198	580054	480494	536779	478512	418148	511516	498514	474938	511689	521564
8.96667	312810	231413	360744	229019	376572	228622	378912	403647	488959	359907	426290	447021	494092	408417	710785	631300	597257	714116	658951	594978	509476	602832	674879	473950	479126	301084	455810	469840	424843	584084	423074	529115	534302	450432	447884	495761	401400	551530	433560	586884	477338	537973	483086	416603	516832	503459	466804	512421	517359
9.05	314802	228671	354804	229006	380838	226654	375426	400126	488786	361990	429798	449287	496391	419618	711926	628957	604697	706055	650823	598116	515214	602388	681479	473360	476969	302655	456973	464440	434944	587389	426161	532018	540163	455797	447078	497018	401025	559228	436631	585069	474559	540410	482477	420752	514163	500029	470166	514750	515357
9.13333	312155	229138	360606	225807	372306	221496	379315	402309	492116	359121	430213	449885	495155	408113	706980	632115	598420	705868	654578	601098	514617	595061	680867	473007	479784	308644	463933	464798	431727	580437	427700	530121	540660	455161	445324	498646	404269	558924	434674	587516	479360	537138	476300	424473	515699	506740	470217	515974	516265
9.21667	307418	233039	357552	228645	374708	231074	377175	402305	486112	361671	433967	449584	498896	419261	712892	623864	591822	706773	656547	600157	508762	602752	679297	478889	481746	303043	460040	467793	434906	577980	430351	521659	541724	456586	444062	498332	406650	558169	429299	585782	479177	535791	481579	419631	514729	502170	474451	510631	515886
9.3	311740	228413	357234	231311	374896	224824	375215	398948	487098	362712	430108	454189	499538	414084	715210	629274	599831	712472	657843	597485	509802	604521	674633	477837	472174	315216	461898	473053	431587	575542	434895	529233	533572	451661	447760	495772	405565	561971	431314	594783	478761	539361	477369	421639	515164	503634	471336	514675	512255
9.38333	309229	231744	361306	227401	371463	225196	376690	396697	486313	359285	428819	447695	499243	416932	704816	622849	600600	709607	652599	602192	511509	597214	676498	477775	481147	312277	465207	468689	432465	573196	432738	526817	541097	454721	443247	497793	408550	556785	430880	585282	478811	537355	479939	423174	514598	502346	470493	514516	517449
9.46667	311306	233898	360266	232056	380895	224319	377191	402492	492774	356919	430813	441462	506257	415036	707140	619214	606440	709127	650629	604207	515485	594477	685699	478000	478499	313760	459795	467039	431921	578250	433960	532547	540910	458062	452410	499086	407328	560355	431212	589569	478380	544995	484063	422168	511026	497733	473631	523609	519896
9.55	311760	233897	356227	230252	375550	227824	384598	408642	489985	365977	435295	453869	500552	417070	707357	623680	602522	703252	649975	605990	513976	608964	675683	475924	476323	320899	461323	462044	434881	579058	428513	525912	539427	454352	450383	499057	408026	557163	428478	583939	478547	539870	478687	425012	516793	503733	473033	521238	519805
9.63333	314452	233221	361575	227044	377444	225155	376324	401309	494086	364539	433026	443570	501139	411628	702714	629367	602732	705753	644502	605014	514142	602768	679003	471920	481393	318930	459101	471733	427500	583104	431888	526417	542419	459124	447252	497192	406759	555654	431957	584029	477377	543861	479368	422970	522779	506254	469814	519890	523554
9.71667	308478	225449	361898	231663	378286	225348	376552	399563	488676	363498	436670	450220	501273	415707	700485	620956	601842	703153	647856	597094	510055	603436	684586	479692	479783	322812	461268	467539	428807	582216	430879	528376	538537	453580	446534	499147	407541	561903	440292	583467	481782	539373	481605	424991	515413	504986	467283	520534	519121
9.8	314239	233635	363943	228542	377522	225840	377095	398337	492773	362109	433903	446564	502911	417225	706474	627357	598621	704272	644217	599239	515396	606494	676836	475942	481413	321308	457755	475637	429599	580929	429031	531604	547520	458896	448091	502045	408215	555263	431179	587358	482593	542490	482706	425874	522783	499373	471414	523183	520521
9.88333	316343	232243	362898	231842	381311	228018	381801	396363	489485	364770	428723	454097	494614	413458	707973	621721	607361	708599	646511	603717	510330	598563	679759	469619	474468	325401	459132	469134	434318	577749	430043	530662	540177	454693	444544	504293	411166	557040	428925	586859	486425	545082	481655	424459	519104	507419	475944	525243	526949
9.96667	313401	232144	362603	227143	377982	227038	376692	399329	492776	365072	433185	445771	495271	416404	707240	622653	609436	710470	648234	598010	512080	605243	674858	477409	476556	321373	459990	465608	439728	577872	435433	534967	533976	460888	447634	501539	406053	561536	437154	587632	478944	541270	484774	427439	526842	510176	472332	520096	522194
10.05	308961	229727	362702	228117	371908	224431	375897	398360	491779	367595	428936	450466	495056	409478	707280	623033	604579	708911	643790	599916	514702	600861	677924	472506	474136	329669	466057	463784	429496	582133	428702	533297	539606	459486	447324	500622	405961	560349	433681	585789	480852	540300	487376	426564	519136	500371	477402	519041	513565
10.1333	310360	231494	359696	227752	370442	227057	376622	397756	494048	365793	429648	447337	501251	413499	707892	621265	605015	714695	645737	600096	517893	596323	678100	478543	479873	330641	459028	471473	435100	579797	428800	533261	541770	453515	447949	503460	411317	561170	431868	585829	480596	541006	484120	431149	514977	507414	475076	526575	518831
10.2167	309297	233744	361385	229986	374631	224604	376476	396788	490025	360644	431250	451736	496023	413323	709474	617634	601924	710493	647144	591109	515757	603608	673392	469656	475098	332392	460529	473564	432681	577753	428287	533618	534200	461132	447314	498504	403239	553426	433426	586434	474349	537136	476036	431059	516120	508411	476133	522813	517291
10.3	313174	232191	361880	230694	377060	228129	374843	394607	486162	360445	432171	447785	502817	415646	699473	614773	617986	706219	647030	601334	516679	597664	676263	478486	481113	331780	458329	468510	434223	580100	429115	532373	537332	458890	450801	504367	410570	558017	433665	592389	477263	548286	482281	423034	521337	500001	472495	519850	515813
10.3833	310225	230878	360090	229323	373238	222969	379329	391901	486380	365016	431131	445801	499527	406515	702476	619611	607278	706952	639539	608742	508364	601196	678942	476557	476784	333912	457690	466203	429893	581903	433139	535650	537137	460134	455046	502771	409576	562791	438575	585014	479308	541504	478305	431988	524827	506959	476622	517990	518423
10.4667	308616	233373	360082	231305	377435	225720	379780	394348	486062	363546	432958	450202	496614	411623	694097	618224	607868	705955	644739	600532	512509	609975	679748	474345	477038	333775	464345	463957	437401	576053	436072	534869	533794	462038	452733	502651	412413	556372	438098	584366	479468	543109	485399	425470	515700	501408	477188	526951	521479
10.55	310087	235677	356467	231899	374980	228565	379787	395995	481902	363506	436584	456130	498666	410848	703083	620653	599276	699607	638111	601492	516167	601049	680437	477616	469780	340549	459059	472946	434945	579283	431682	532174	541421	463534	444608	505943	412729	557099	438123	590957	479070	539880	481867	431365	516490	510840	477372	521359	519767
10.6333	310214	232079	359244	232206	372485	230850	379365	394477	492558	367926	429635	452042	498688	410315	704208	618055	601411	707115	639119	594213	520148	602412	677462	478135	478000	339330	457098	467223	430245	576841	432474	539442	535985	458147	454767	499632	409375	560850	432858	589823	478367	544573	485639	432376	525034	509762	481504	523853	523516
10.7167	310484	237680	365291	233042	377089	228486	376913	396987	494064	364865	431237	450468	498993	403319	702185	619000	609796	705296	642226	590889	514724	606257	672892	475062	477394	339657	459386	468860	437984	583895	432686	525807	540078	457657	452315	501659	408024	555547	434403	579878	484216	545684	479553	432737	510760	503475	479504	519326	516123
10.8	311782	233055	361159	227840	378260	228476	382814	396997	488886	368046	431137	447981	504422	414590	696637	618996	606484	701351	643093	592239	510366	607353	684400	474586	478518	344522	459868	471911	435338	581898	434429	528822	538053	451116	447354	498199	413340	556743	436533	584162	474796	537846	484378	428792	518233	505269	477845	525846	523902
10.8833	310994	235794	356675	230403	374794	231290	379971	393175	489475	363034	430668	449030	497485	404252	692893	618597	604277	713442	647425	595210	514733	602794	683320	477447	473533	341080	458367	469457	431397	581795	433404	526686	539476	458481	454098	502601	408542	559978	434002	585371	479898	541078	479080	430720	525254	501261	482191	518693	522751
10.9667	308434	231684	362332	229008	371012	223959	377915	395564	485159	368162	427114	442988	496391	403231	696348	619999	607829	703969	636041	599957	516725	599867	677843	475121	478758	347163	460891	467849	432423	575692	435196	530987	541109	462969	450823	500613	407857	555765	436137	591335	483010	545573	479718	432518	518680	503805	479936	526254	517539
11.05	310981	231914	361438	229913	371243	224074	373672	392199	481055	363115	431957	445955	500070	399296	699082	610710	612511	706092	638120	602536	515650	602628	678838	481743	473469	346098	461713	463247	430263	580861	434715	533873	534570	457647	448061	503311	412838	555948	436569	583068	476647	542187	482724	435798	523546	506419	480357	526296	524863
11.1333	307986	229315	360711	231697	377335	227848	380387	398156	485853	366996	432616	444252	502173	410224	698742	611643	610892	710696	637453	591283	521086	603139	679970	477468	480371	349199	452828	465239	436337	579428	432231	533965	539609	452839	451867	500382	416053	556015	436887	582150	475428	541931	475108	433717	522820	504638	486958	526880	520422
11.2167	304671	230800	360213	225755	375703	228564	380038	395294	488289	364800	434470	447567	495767	402777	697357	608231	613809	711195	635021	593638	510945	601737	680843	476276	478697	351538	459065	463782	432840	571146	434990	534068	534134	459950	440089	503910	410766	556186	437707	590724	486152	540040	482245	435165	518744	504003	474342	529495	521816
11.3	314090	230698	357372	229110	378824	224554	379564	392654	489188	367381	433144	445927	504464	403379	689737	609717	613357	703959	640515	596856	528248	604499	685410	472037	474286	348816	458090	469220	427914	575296	433052	533911	537541	459901	448183	501151	410822	557088	430435	581496	477928	540469	484797	431861	526393	507204	482119	520257	522102
11.3833	307137	230306	360271	232554	377130	226378	378938	389068	484752	363160	428264	440032	497057	405357	694881	617934	605786	704923	636863	596118	521029	603329	671030	476427	474286	353205	458016	470252	432612	579113	442229	535705	532098	458276	448205	503157	411562	555811	434795	583622	487292	539810	481010	434274	521462	506442	482719	526766	516562
11.4667	309888	233005	360545	230948	377940	225477	382850	391875	490082	360757	435503	443232	498961	399112	697998	609569	613190	705334	632385	591156	521380	598674	676610	477098	476943	358740	457788	471707	433388	575757	436423	525422	539346	458016	450710	503770	417957	563110	436895	588899	481791	543180	482854	436410	520024	508176	480732	523525	518512
11.55	308347	233979	361804	229900	378100	226977	375961	396339	482721	364039	433396	444913	498078	403878	687901	608414	610422	702827	632650	597468	516437	601153	675691	476728	478857	355821	462195	464411	431973	575054	437204	531320	531993	460405	454524	502477	411819	561298	437656	585448	478605	546129	484280	431397	522656	504859	478054	525460	520385
11.6333	311851	232555	357274	233710	372414	227705	377053	394345	487569	363864	434217	447617	501883	407035	689451	612729	605539	706726	628548	597528	513851	599561	680596	482965	478471	359218	462155	459156	439005	576828	432615	536483	534181	455017	446558	499850	404811	559399	437046	585479	472355	539944	483261	438476	525779	506623	481704	522809	517321
11.7167	307568	232054	358033	229598	376661	228484	376139	392411	488082	363549	431321	439087	499713	400121	688650	608742	609921	706190	622095	592974	515747	606021	675700	474924	475322	355915	456059	467048	434639	579567	433916	532885	536919	451692	446539	507647	402146	559193	427346	584099	482441	535938	482011	436547	516065	512258	476227	526685	515713
11.8	309124	230880	358263	233854	373460	225949	376951	389848	484705	362113	426137	441551	494462	400195	692536	612842	613357	707492	629821	588829	518912	606258	679059	473220	476615	356000	456893	468164	437370	576424	436734	529854	537138	453023	449255	494644	413666	557622	435779	580872	481587	547574	485302	438012	522566	504081	479262	523364	516834
11.8833	309537	230585	356196	227739	373396	223532	375984	388514	488583	365491	426638	442590	498240	408874	693239	607379	604174	698106	631180	592906	524440	599386	674886	472640	477661	355008	462187	465516	436003	575526	442806	535236	541372	452906	448124	503907	413762	554827	433704	584883	477041	543275	477360	433503	526747	505050	483125	520599	514818
11.9667	311378	233744	360970	232611	372346	227860	376655	388966	480848	364603	429393	442530	496434	404517	691511	608400	608811	702431	631968	585910	518579	596739	677481	472775	477036	362434	458751	464637	433518	575755	435620	535105	536486	457815	452192	503969	413840	555942	440235	587025	478503	543410	484616	437207	525127	500551	480762	526819	517210
12.05	310066	232802	360932	233280	368496	228912	376657	388444	479230	364866	428313	439038	497773	402334	694237	602202	608059	701062	627203	588368	520970	599724	675909	470291	476507	364362	458846	463961	430084	578749	437108	536019	532706	458709	450590	498645	409766	558070	435910	583928	485707	540562	481243	439657	523970	503922	481204	531560	514901
12.1333	308464	233096	362036	228899	372994	225984	381156	387705	479842	367596	427618	438530	496797	401618	691688	603170	610203	692506	627796	589510	515556	604769	678346	470371	474945	362403	451878	462684	437558	575593	429881	523801	531383	452605	451196	504127	407216	564764	439051	582921	484815	543442	482037	434765	519629	501986	484089	526694	511318
12.2167	308285	231578	355380	226648	376907	227954	380387	392865	479992	361751	429200	438137	496096	400932	686918	605290	610012	700361	626256	592685	516864	597761	681095	467987	482444	366223	456302	471074	433375	577180	432147	534374	537484	456643	448222	507688	406690	550797	433414	587756	475681	539622	480433	435357	521032	505553	482867	526605	523516
12.3	304309	233999	368056	231127	370808	222078	375541	384372	484454	361751	429791	442831	491228	398276	691168	604719	604795	705372	628394	587163	515519	593049	672752	473965	475876	368053	457944	460653	438505	569973	433708	535849	529404	455862	446011	506617	408857	556027	440297	587509	480791	548139	478092	441401	522357	501822	485932	522328	518051
12.3833	313881	230951	360902	229487	374071	226484	377728	386307	482408	368343	432274	444592	497056	404398	688290	599728	606097	697405	616565	587667	518002	590303	670371	473895	476372	369283	460642	468452	435799	571983	432578	533251	539272	454333	443553	506773	406273	562373	435736	585280	480745	551182	482645	436181	521683	500800	485692	520078	528999
12.4667	313601	229935	356060	231432	380579	225792	377591	390502	478873	371578	427741	440903	496375	399655	684891	603564	606083	695379	627667	592081	514467	596814	678302	468410	476908	368899	460464	462773	433525	574133	429172	530248	530552	453339	443777	503669	407878	553558	427914	581153	472078	539227	482096	439427	519951	507938	485686	518993	515705
12.55	308058	231274	358267	230242	370477	224496	379891	384360	481159	369111	429993	440898	493460	405877	685024	601231	603905	704248	623291	587156	517775	590085	672900	470202	474716	369800	454443	462968	431852	574334	437507	540545	531501	453309	444799	506467	410300	559583	436774	573683	481592	543623	480436	434964	519173	505469	483007	528123	517314
12.6333	314562	231985	357561	228719	373604	224152	376296	387972	477255	364297	432530	439235	495547	400913	677899	603885	609338	698983	625023	591211	516079	596396	675839	469317	470356	368389	455713	463642	432788	571836	430108	529406	532923	457527	447237	504052	406843	554056	437341	577193	476779	545024	475473	439259	521731	504474	480399	522600	514457
12.7167	308821	230324	355575	227007	371206	223782	379739	382463	475471	367503	426758	438298	492037	398407	682275	598015	606977	697595	617339	582116	520445	597682	674720	470426	474273	372029	457581	458948	428071	577644	436565	529420	532505	455596	451100	502268	414411	557525	432223	580893	478483	547263	479089	436635	519150	504814	485084	527141	521114
12.8	311912	229119	354447	229639	370252	225889	368714	384060	479055	371978	431349	435797	500570	401630	685212	601232	603441	695678	616481	583996	516693	594292	678286	467802	473491	372641	451859	459835	431882	577961	439658	532411	526413	450433	446248	496015	409980	552963	432891	583143	476358	545261	487069	437207	521214	506682	480073	520578	521830
12.8833	310782	230048	355270	228971	376642	223028	374900	385266	480050	364722	425699	436561	494639	394607	684825	597994	605574	694191	615415	588414	519680	598238	679544	467784	472532	370749	448808	463431	429083	575261	426965	536274	536107	453066	450106	506465	410304	550989	430792	580501	473676	543291	477091	436248	518146	504383	481799	519579	512411
12.9667	308348	230951	357673	230385	378355	227041	374052	383002	475838	371709	427654	438555	491651	397295	683834	598645	603458	691835	615806	587912	513412	598049	669303	471011	470976	370830	456190	456930	429279	568330	435005	529071	537324	455891	448824	503174	410791	553718	436869	578817	474963	536957	480969	438412	524570	502202	489291	517463	512385
13.05	307180	233158	355691	227609	373270	222686	377653	382158	483331	367662	426090	437980	492514	392024	678686	595998	609986	693033	619790	579564	521371	596196	665886	467559	474775	377134	452358	461175	430576	572130	427870	531705	535442	452692	439631	505007	415522	553088	429467	577952	482947	540914	476576	440436	525280	500909	481982	522125	515567
13.1333	303867	230639	353608	226816	370137	227177	372970	377885	471697	364505	431351	432267	493131	397928	678483	598335	603400	693643	611247	579107	517983	592592	668296	473347	467837	373336	456570	461815	431927	571685	438736	532129	531891	453373	444436	505917	412331	552852	428613	578910	472363	544663	470752	443400	515189	501343	476303	525657	511005
13.2167	304511	232382	361450	228675	370420	229788	371007	383026	481103	368700	425050	437037	489247	391756	672984	595075	608329	692089	611645	584183	512380	600078	676171	469924	470765	376408	447929	455777	433560	574066	432304	529319	525581	455889	445946	502328	408455	553473	441597	579280	478818	545115	482600	440727	520310	496732	482980	524603	517438
13.3	306934	235286	361021	227470	371376	222949	376212	382844	478212	365996	423255	435276	491445	392543	683842	597740	605686	696732	610546	586708	518824	595646	662270	461821	467310	370134	450382	462307	433585	566938	435829	530632	532758	457389	443716	504200	414595	550891	434069	578352	476713	539685	482977	434838	519596	497230	481838	521916	512048
13.3833	307646	231849	357995	228126	379045	220665	380232	381894	471854	362205	421760	434633	493513	392832	678341	592612	607297	688675	612584	582688	513997	591255	667868	462225	477555	370130	451644	457957	432299	569562	433707	533560	534181	456230	447364	505265	405812	548599	430268	580495	470922	542866	477070	439385	519734	502197	485201	526612	512322
13.4667	307176	235244	358429	230525	373032	224016	372669	380876	474527	371377	425088	436109	492322	392371	678625	589878	605831	690228	613532	577330	512749	592829	663147	471738	467591	377345	456026	461591	433103	568601	432159	535998	525967	451385	446801	501797	410217	552284	433783	581147	468796	531910	476433	441448	523020	500265	480752	521164	509750
13.55	308016	226870	362196	227300	374765	225945	372204	378688	479755	363687	425700	436460	486947	390606	674761	596921	601434	685490	614726	580093	520832	587498	666088	470678	475328	377377	451548	465001	433761	568574	428105	531299	530614	451429	447076	503932	412197	553998	431417	575437	477265	545427	480405	438664	521533	501871	489589	521634	515462
13.6333	305488	228639	362704	228329	371493	228005	372509	376035	470792	363559	426863	435092	487831	391935	669035	592612	600680	693242	605209	573446	514012	597925	661644	463073	468630	380407	450417	460264	431618	572074	430299	532982	531457	451056	447336	496838	411988	554699	430881	574834	480039	538302	478837	441534	521585	503418	480914	522285	511615
13.7167	307778	226477	362566	229738	371722	224460	369647	375233	475858	364406	421770	432652	489526	393896	675774	580805	603641	686985	603774	577171	517989	589604	660571	469602	466447	380093	445350	465607	433659	564746	431769	528973	530566	453085	441551	501843	412270	550348	430868	573652	475418	536813	472657	441107	513349	499623	480265	522231	507880
13.8	306501	231374	355728	226693	368270	224293	368298	375164	479459	365053	424535	434787	492065	394312	670754	583392	595428	685711	606026	573300	515201	590980	663219	472046	472783	382256	450813	460037	425679	566305	432823	530948	525683	457010	441972	497737	405165	547580	424493	577447	472609	536585	470838	440867	516919	499998	482923	526288	517325
13.8833	303575	230137	354881	225233	372477	223013	367188	371421	475089	365772	421616	435582	489301	393346	674152	586807	604743	694942	603830	576926	516956	587911	666690	466037	471103	382136	451007	460185	432905	569835	431064	525018	524640	449162	442564	496321	412162	550822	432520	576698	473456	535375	473808	441726	517627	502893	489864	521870	509263
13.9667	304611	230290	356971	222912	370270	221599	373919	372671	476748	365765	418809	429827	488383	390703	672141	592401	605848	685901	610355	573775	513081	591756	669319	465607	470667	381427	442012	456104	425144	561847	435178	532154	521796	445407	448442	500969	407903	544983	428656	575475	474182	535791	472010	443169	522799	497256	489317	520698	514014
14.05	306761	233409	355093	228931	367461	221709	376743	377033	473570	361993	427480	430544	489307	391106	675068	585289	597753	691516	604043	575688	514083	586575	660487	464586	464907	384853	443968	457976	425994	563626	424791	529975	521964	448511	445839	502252	411542	547151	429458	580688	476436	534034	475988	440245	518630	501882	486801	515457	507305
14.1333	301320	228013	352586	225065	374629	220027	371375	377024	470863	361320	422857	435996	486649	389517	670668	581800	600987	683363	606759	578814	515086	587608	664310	462498	464794	380832	451291	454980	428934	557686	431036	528863	525427	452155	445035	501760	409571	549592	432063	576505	478380	538339	476722	440451	515973	498755	482577	518541	510214
14.2167	303840	228991	351511	226293	374943	220997	374771	373671	472034	360774	422513	425938	483129	389014	668269	578431	598937	683889	607394	575351	510306	588988	660885	459689	465200	383219	442558	456569	427332	565338	429775	529779	520261	447480	446360	507850	411538	548215	425935	573575	473598	540830	467968	440491	512856	502155	478730	517123	511955
14.3	304557	229443	357638	226810	367406	220646	375020	376686	471536	361061	421860	425494	491036	390005	670489	584819	601606	681945	601876	571576	516269	588109	659486	464235	467817	383643	445032	460090	428417	560430	427100	527337	522613	452319	440479	506080	412978	552152	430694	572266	476015	535983	469525	437568	517827	503775	482105	523652	506117
14.3833	302974	228685	355670	223254	373458	224761	367483	374611	470824	368768	423309	431759	487489	390545	673660	580188	598250	681669	599470	578009	516639	587574	662529	458137	467516	384837	448381	461805	426208	562819	427522	526577	518917						432530	575849	473962	537659	472663	436196	518160	501618	490095	521607	512010
14.4667	304032	230866	356977	225150	371515	223191	370143	372600	472527	367281	423858	429905	487997	385249	666307	576498	598568	686888	598794	574165	512536	589414	659331	464697	466284	383080	445039	457165	426209	561679	426807	530919	520892						429767	577143	476006	539300	471246	439075	510132	494109	489475	520615	506559
14.55	305813	232182	349969	226412	366725	221707	374485	373844	468244	367088	416702	430807	485652	385101	666392	583434	599458	682165	600311	571840	508097	582936	655700	463053	471846	387606	449217	452547	427882	565755	432934	531077	524930						427461	578904	471394	541006	475956	442704	521008	501945	485295	519575	508237
14.6333	301885	233512	349873	228937	366122	219074	367833	365961	468648	367996	420061	425817	484642	383411	664546	578636	596100	679604	595408	577248	507759	587918	659187	466526	465291	380383	451672	451482	429346	565039	431158	529420	520412						426112	572797	475727	533711	470620	441320	514047	499700	480226	525241	508937
14.7167	303995	226641	354583	229678	364544	224431	368475	371273	471976	360207	419561	431672	487756	380115	662975	574150	602637	675380	602933	559057	507705	587813	658590	459775	465364	382795	446331	453574	425540	565234	424066	526710	521826						425810	575384	477195	536543	476580	438185	514613	502408	486067	519737	505971
14.8	302593	228430	354371	226574	369851	223715	371248	370361	465230	360406	416600	430668	482001	384980	658341	580270	597046	680351	596590	569894	510438	590750	659196	458067	467302	384352													425283	572755	465099	536829	475164	437855	516259	500927	486390	522534	509570
14.8833	301324	227223	355967	223406	365337	221785	366895	370464	461839	362627	414308	428107	485578	386334	668178	576529	598028	681598	593640	563788	509299	588031	660848	467369	467027	387488													426837	578299	470439	532481	470498	440251	520387	495420	486552	516812	511626
14.9667	302067	227635	349995	230370	370485	222686	371400	368238	465635	358971	417247	425000	478741	379116	654645	578112	593134	680451	591397	567491	511385	582793	653099	454418	460266	385448													428869	570768	468670	529076	469088	440335	511025	493988	486644	515726	509078
15.05	302957	227471	356012	223963	364598	220631	369855	368267	467331	362188	414343	427876	479081	381913	657613	578125	605450	678412	592898	567241	512474	578737	651789	462561	469688	388885													427187	572934	479761	533915	471482	443133	516544	498539	485798	525913	500043
15.1333	303916	232627	349208	225616	359892	223932	365846	370363	462000	356095	413056	427271	486792	384632	658611	575933	604443	669758	590227	569159	510525	582516	655013	462062	463940	390053													424880	569466	474322	530475	471680	443318	512946	496054	489396	512717	504444
15.2167	298074	234535	355975	222791	367654	224106	369486	365363	468080	358080	413824	423630	481471	382518	656080	570165	594047	684787	588439	566252	506390	578678	651728	462251	460443	391656													422806	573010	470246	535882	472135	434948	507761	498432	481474	522231	506780
15.3	299954	231006	349822	224762	363425	220664	367321	370301	460893	364234	414494	423308	480652	384733	663209	571654	589599	675752	589694	567626	503546	577418	649679	462514	467120	390675													430684	566922	469457	532912	474538	440130	511316	493555	482377	519778	503090
15.3833	299844	225398	355877	223221	366876	219018	373107	372457	466872	363406	414667	419256	479095	379372	652592	566015	595995	672822	591441	561008	501882	575745	650638	459584	460237	390237													424803	573441	467567	535018	468195	442243	512488	494613	480340	519426	507075
15.4667	305789	222005	354359	223273	367635	221520	365238	367396	460827	364182	415424	418890	478067	377271	651852	567535	592998	673091	585670	562979	501541	579359	656209	460363	460356	392133													425813	575137	467946	529144	465916	438319	515750	492759	485907	517908	506063
15.55	304957	226442	352365	226251	362658	220489	364939	369338	460808	358969	418325	421389	482067	384650	655341	566953	593452	674949	588188	564676	512057	576308	647423	455117	461526	398319													426117	569401	464926	527826	471832	434944	508274	496625	479901	518679	502487
15.6333	298024	224337	353702	226631	366784	220404	369692	363369	459794	358236	416842	419876	475700	379222	654913	566923	588548	673386	583736	562708	504747	578018	643960	462489	461685	390699													421824	568097	468657	527566	465551	438694	508367	494238	484715	508829	505852
15.7167	299737	225028	349684	223154	365658	221747	369583	365241	458143	353900	407298	418572	473062	381401	647366	567411	591925	668550	584823	561398	510256	577320	645301	460875	465438	399576													425161	566106	465147	528257	468066	437987	514181	497741	480432	514233	504811
15.8	299434	227113	349568	222636	363014	217270	363040	363314	460814	355800	412990	425500	477007	380963	647383	565183	593936	671796	576885	565902	504346	575434	656942	450577	463084	390111													426707	567053	465006	527071	467921	436410	517617	489979	482206	518530	503798
15.8833	302725	232244	348600	225202	364910	217696	364910	354829	461101	357462	410034	424762	476406	374647	648516	563701	584706	672292	582011	558839	502885	576149	648507	455236	463029	390528													430615	563473	466156	537154	466946	436765	507253	490987	488077	514356	503110
15.9667	296514	227843	353119	224542	364246	223769	367177	362598	459740	352510	412321	418271	477758	375002	648764	562649	590182	673539	583177	562587	501140	579916	637013	461236	459494	391606													420364	563660	462453	532529	468928	438890	511483	494991	485021	517468	501999
16.05	300814	230220	350587	226368	366690	216727	361960	365026	462712	360308	414024	420039	474921	371669	645095	563321	591362	673583	578313	559637	498753	573044	640674	459813	457785	388663													419830	567679	469580	531921	467028	434352	513806	489622	478495	518985	504660
16.1333	300692	226257	354232	223766	363375	219620	366236	360368	454425	357097	410361	424431	474661	374777	652225	564072	588020	663415	577774	561356	499657	573871	643854	458009	465076	396111													421219	563160	468793	523356	462729	439754	512068	489935	478290	514378	494672
16.2167	294713	228701	352402	225007	365137	218924	366346	357646	454949	357302	415927	419663	468728	375453	643781	559268	585040	665812	571255	550002	500483	577177	646490	454106	463848	393798													417459	561865	471246	529852	465387	439391	509898	487453	483132	506868	502099
16.3	297777	225964	346903	218958	367470	216200	363455	360338	460613	362173	407086	420221	471221	374831	641157	560875	585991	667687	573718	558701	503914	575366	640189	452506	468810	395075													419756	566397	460393	528678	469259	433259	510100	495096	479474	514172	497906
16.3833	300127	224731	350412	224422	361678	221903	368488	360928	456504	359650	408892	417223	479009	372925	641494	559539	588310	662440	575018	552660	498485	579193	647975	457943	458533	392944													419490	564418	469307	526543	463257	434903	516762	487811	487055	512777	497341
16.4667	300077	219535	353292	226105	361327	219978	367485	360638	451865	353885	408962	412557	469002	368964	648015	559842	582310	662228	581514	549941	501692	573603	640147	450898	459987	395042													427582	562396	457778	534674	464590	439436	510121	491447	482755	517559	499161
16.55	297928	227093	345469	222934	365818	218609	360978	358573	460278	349502	415572	419387	469011	376277	647113	555893	586000	667364	570282	555664	503335	575237	644871	450239	455791	400530													419408	565643	463998	533747	464275	436610	507065	494582	483860	516875	497383
16.6333	294666	225043	352200	222467	363445	220932	360808	354936	449249	353523	402209	420000	468167	375541	640873	556959	586398	669082	568551	557376	502843	568368	636545	449679	459111	400758													423636	562826	465486	530096	461658	436896	505344	484924	482111	513951	494633
16.7167	299416	227521	354679	223147	359172	220364	363819	358615	449112	352297	412532	415558	470890	371928	640275	554153	586415	663897	567874	555462	502328	568486	637276	451459	454064	394934													419872	555005	466046	529332	466028	434503	513083	489978	484103	510577	502594
16.8	296325	225150	349594	220883	361409	216156	365849	352557	456887	353862	411980	415855	474857	369739	643779	553617	580572	661189	570663	557448	497485	574850	639753	451941	452848	393257													420781	564849	467631	528603	471798	438952	514935	488348	481426	511463	489788
16.8833	299472	222463	347312	221882	367760	214137	363574	358092	450889	352855	405088	416708	467197	370815	644890	555259	583596	657562	570994	559067	498477	576129	640673	447721	452239	398312													422803	562798	463298	524127	462110	436002	511047	485253	483211	511157	496286
16.9667	295477	222766	348489	223989	362972	222301	359180	353446	451983	356600	409177	413356	467965	364603	634880	554485	576721	657795	567433	552523	505562	568793	642458	452939	454377	394608													415192	563554	463707	528978	457210	431115	505432	489105	476141	510739	495024
17.05	295961	224575	348339	221589	363257	217835	360102	354754	446276	352322	405645	410869	463795	371462	643922	557311	583524	655642	566064	549331	500391	571084	638626	448746	454074	398121													418006	555657	461625	523499	460547	438694	509861	488134	478105	512065	488634
17.1333	297149	223591	345793	219766	359210	215313	362439	353137	453157	356494	410687	415013	466246	372222	637030	549616	591983	655751	567855	549060	489342	568107	623709	446719	458295	394066													418092	567068	465259	529688	460909	433021	505955	482727	482649	507565	492080
17.2167	294054	223280	347491	225134	366879	217033	362621	355687	445877	351921	401391	412056	470347	368503	647329	552518	582345	660528	568001	550759	496388	564974	635867	448809	456671	396829													415392	561165	460714	518589	460376	437097	502274	488448	478758	516024	494292
17.3	299378	225493	347725	218070	366613	216022	361345	354430	446035	355728	406944	417433	466815	368072	636974	549281	581348	656241	569190	552937	498835	560992	631149	449785	456144	393144													417628	554136	458379	525423						511772	495202
17.3833	293316	228399	347568	219133	365646	219447	356153	355678	443088	351496	411401	408354	468596	370650	637308	551862	580197	653058	566254	548905	497413	566134	633067	443348	451415	398658													420463	556883	460475	528747						509163	495406
17.4667	294646	221235	351022	221654	362347	214552	361460	352016	447928	354563	413103	410440	467359	364555	635683	548470	590725	654382	564287	540629	490825	566774	636048	447274	452259	395869													417740	562668	463290	518786						508605	498122
17.55	300287	223704	347450	221013	357523	212259	359494	354863	442514	351216	402450	415818	463208	367680	632262	546617	581195	649913	571667	550872	500049	561512	627979	450307	453881	398352													421740	553271	461288	518598						510074	493680
17.6333	293912	218294	346874	221703	359700	219206	362044	350100	444921	351478	399829	409262	465998	365730	637860	548018	581583	647591	565550	539841	494697	565668	628059	446839	449410	398500													411062	558447	455566	518771						505355	491521
17.7167	295265	226135	350368	222965	358902	213695	357675	352877	443185	348189	404975	409332	465494	368062	628711	549249	579998	649322	561695	542026	496096	561154	630654	443584	448671	398291													413160	560683	459815	523419						506932	491547
17.8	292015	219168	346552	220655	360492	219062	361529	352090	440563	349887	404304	410132	454666	366805	634682	546660	575577	651047	564860	544482	493078	560655	628541	444337	453869	398046													418032	551900	455119	522143						506139	487693
17.8833	289321	220947	345028	223846	359881	215791	358687	347784	439682	346398	399909	408934	459519	363303	628266	542806	573292	648467	554938	543889	491953	558905	616703	444419	449087	397974													413037	552047	457308	519593						511401	483603
17.9667	291903	222107	345186	224536	356778	216491	357087	348392	441044	347200	397495	408726	459818	364507	625343	552393	581111	654318	562369	533819	496412	558836	622531	446069	452351	399212													413174	550378	459252	516707						506746	489693
18.05	299453	221730	346557	217814	357079	218840	354674	345006	434149	351380	401351	408957	456557	364168	625580	539636	577360	650426	563335	540880	496668	555509	630114	444956	446957	399223													414652	551884	455698	521687						504824	488997
18.1333	291787	222992	346843	221859	361829	216395	356854	345499	435717	350229	401599	412745	459998	359151	625357	541470	578239	649671	560379	540439	493435	556038	627067	443708	447402	398834													413363	553065	455552	514044						507303	486882
18.2167	292800	222804	339944	217345	354410	215051	357354	347555	442087	346275	399555	399876	461583	359473	630994	541176	573311	644642	562364	539610	499865	559804	626122	444615	448356	402188													413401	552312	454082	524599						507454	488528
18.3	294118	219733	344844	221333	360708	217294	361424	345397	444967	346340	397129	410176	455098	354628	624930	543227	573929	645185	556105	540862	493118	560590	614165	441460	442991	399596													412196	557380	455316	520921						509792	489676
18.3833	290434	220681	343041	221406	356463	214150	354515	344251	437558	346478	398333	407616	459308	362893	619301	543035	573982	644191	558811	538525	493023	561019	623383	441911	444899	400035													414704	558268	449533	515963						507114	483549
18.4667	293710	219929	339867	217047	358463	214672	360434	348584	438181	348388	399595	405382	454410	356082	621962	534459	575890	644814	557176	536722	486436	557230	613891	443107	450085	399163													416148	553022	449862	512353						498536	488707
18.55	296831	220967	342214	222032	362969	213159	351245	346242	434129	345545	398569	397704	453381	360560	619027	536952	574113	639501	549923	528162	492586	555316	608743	443909	446633	403101													412932	552525	454207	511772						502776	483222
18.6333	291665	221185	347415	218278	354549	214331	356635	341610	439284	343510	396071	402396	454571	357988	618208	538102	573129	640236	551824	533549	484975	565726	618932	437909	447944	401425													414289	552350	453400	513483						506967	480506
18.7167	291486	223250	340938	222083	352592	218271	359128	342090	435619	354272	399077	407651	451864	363806	615323	534683	568824	643310	551127	528305	488286	555255	618030	435959	447775	401637													407080	546699	456790	519358						508737	481319
18.8	291217	218712	342345	218157	355558	214904	357165	345925	431770	351093	399407	396144	456424	355831	618859	532713	574190	637339	548607	535496	493477	554301	617123	439031	447029	404190													413952	549481	451546	512070						503100	485737
18.8833	290421	224055	343550	215028	354821	213063	353279	342527	431759	344417	399331	402275	453316	351992	618165	534329	573074	637295	548199	532518	491326	553731	614133	435766	444866	403827													407758	550136	452149	513924						495576	483761
18.9667	286764	220181	338771	213727	355788	214815	360130	343322	429902	344637	399671	397566	453100	357144	612841	529594	574126	634682	546997	530201	486215	551291	615569	438606	445622	399673													407686	543862	449552	509406						499474	480403
19.05	293323	218870	343250	221180	355656	213123	352241	342250	433565	341235	396620	397261	450343	352941	617051	528767	574781	638363	548179	527039	486751	557695	612566	436890	446219	400735													409296	545991	449991	512159						499092	476202
19.1333	287905	223228	338704	215853	358476	216869	349826	342108	425431	346077	392531	398119	451131	355346	608160	530133	574424	638391	547002	529736	488526	550542	616199	438992	445871	395828													409011	548834	457697	520810						499479	478779
19.2167	288288	220473	338162	218457	360035	217577	351730	340707	427290	344602	391197	393899	455423	353869	613790	533241	575743	635540	544496	533476	485747	552958	611011	431143	442902	404573													409353	545738	453814	510415						496771	482644
19.3	285714	221029	341723	220252	353883	209547	351746	340018	427503	350169	396048	396165	444228	354749	608994	532497	571567	633470	546588	531431	490161	550878	612043	439415	445348	397587													406152	542400	449710	504941						502340	477432
19.3833	289812	220933	338429	216081	353016	215723	351885	340711	428783	343627	395763	399611	447201	353635	610886	529596	567143	631460	539224	527534	484233	548230	605981	437836	442578	401095													405227	541384	455462	511638						498429	478910
19.4667	291831	218785	343975	217432	354455	211522	354619	341573	430396	339695	389548	401559	453971	356792	608968	526051	564167	627969	538675	529121	486049	546131	606468	433536	440051	402775													406102	544447	447347	513302						502381	482247
19.55	289432	218753	339026	218372	354479	214412	351103	336148	422139	342937	393580	388139	446136	351762	609032	524908	563549	634366	539512	525527	487558	550625	605522	436932	438644	401042													406419	542981	445947	509510						499662	480175
19.6333	287835	222676	337605	216463	356826	211990	353882	336941	425012	339143	395847	396883	451921	354101	605150	521340	568089	632293	543746	529125	482321	548563	606053	436943	444033	398416													409106	541457	449732	507574						502704	474375
19.7167	287329	218508	342183	216742	355710	215034	349313	337307	422767	340884	389559	396379	447371	352773	604370	525500	566509	630920	538230	526235	484659	549810	601003	431180	442710	402616													404295	537945	445832	511173						503309	478653
19.8	289987	214925	340078	213603	355402	214634	352317	334149	420185	345134	389836	391196	442259	354992	607145	521540	559706	625854	542239	519839	484418	546763	603523	433704	434482	399836													400098	545198	444640	510557						491866	476160
19.8833	286091	222411	339929	217992	354049	210197	351769	332201	425194	341082	393113	395518	447607	353045	608066	520781	563121	628715	535717	522427	479624	543313	601716	431118	443107	400502													405405	543162	448862	502848						495440	472865
19.9667	284523	222258	337829	214910	352053	211577	348091	336517	420238	339264	380968	396226	442812	345694	599943	523384	566516	627255	536342	526332	485741	539953	604309	426872	443720	401795													401389	536111	443012	510250						495893	479682
20.05	285800	218348	342824	217466	352241	213588	352772	337307	416910	335730	394021	395044	444847	349422	605474	521492	560842	616834	535739	523197	476827	543121	595894	435082	441879	404585													401581	538012	442555	509917						498043	474440
20.1333	286318	216306	345668	214640	350998	209375	351766	336771	418782	336707	388343	390553	440293	349988	603834	522654	564109	622387	542895	517949	479474	548835	603596	432400	443842	401633													400228	533652	444329	510213						493257	472872
20.2167	284024	215447	340457	212591	352784	208347	348618	332657	422334	341892	383373	390938	449338	348486	605113	516250	563410	617462	534011	517852	482603	543593	603942	430716	431592	402754													400998	536680	446997	506794						493679	474133
20.3	284590	221123	339950	213294	351751	208562	351418	332960	421109	339611	382640	392579	441810	349502	600989	516456	562573	625908	531849	513337	478606	539795	595807	428286	435105	399600													396409	537760	443277	504616						496814	468785
20.3833	281102	219220	337562	215768	355906	210334	345814	335587	417826	339817	389300	392959	442010	349757	602630	517441	561970	626897	531643	519412	486261	544765	597518	431072	434776	400831													397191	537704	445712	507287						486875	472999
20.4667	279282	216992	340487	211716	346218	209101	352951	333872	422840	343558	383521	388575	439043	347698	601145	513594	556943	621304	526062	517461	477824	533346	595583	433564	440553	400570													404970	539478	437833	505285						496163	468909
20.55	282371	217782	339770	213211	356160	209423	353628	329794	420981	340870	388748	393138	432646	344285	594804	517024	558784	617214	525167	516100	477243	542522	594634	430444	434705	405482													404414	534293	446816	507953						492411	469147
20.6333	279966	221478	335424	210895	350209	211686	350926	333596	420919	340071	376687	392323	438014	345979	589316	519650	560099	622197	531205	514700	479658	539567	591780	428831	428600	399208													406642	534325	438431	499399						493441	471313
20.7167	280170	213949	339740	211311	354111	209689	347627	329365	419840	338637	382958	394040	444503	341797	592323	515540	558356	619423	530479	516417	473737	531934	594481	429754	434832	401421													397114	533321	437528	502353						488331	464403
20.8	281231	217041	338315	217333	351842	209301	344950	325749	412935	335563	381737	384930	432993	344840	590905	514246	554990	613926	525434	514139	474651	536193	591397	426817	425964	400743													399480	535466	445397	499191						492009	469182
20.8833	282589	214517	333245	208753	350951	208107	348255	326160	410945	337007	388017	387682	431816	343761	591789	507461	555722	615299	526068	510203	473283	533587	589639	424368	432067	399391													400223	528169	449929	497726						490524	468817
20.9667	277615	218283	332581	212662	348698	209988	345615	328436	414595	334455	380622	388610	435327	344742	593169	513025	553535	611180	524374	509720	470655	537948	599027	427274	431799	404170													402267	535020	441519	502876						491318	468514
21.05	280552	213227	332861	216718	354332	207180	349176	326427	408551	338835	382394	384710	436074	344536	593768	509893	559388	613923	526024	512954	472173	536903	593364	427948	435029	403106													393898	529841	438680	505241						493765	471531
21.1333	283402	220395	334074	217935	345014	209714	348651	325444	408754	336056	378218	386580	427843	340912	590718	511505	551743	615651	522535	507007	475357	536093	584955	424713	430285	402970													391252	524897	436018	498492						489862	471316
21.2167	283641	216465	334308	211974	351776	207820	343668	328327	411685	337469	381895	384538	435570	340870	585230	500525	551904	614491	526037	510899	475712	535296	591518	423163	434651	402146													398921	530004	435322	497507						487118	467603
21.3								327376	412239	334883	384628	384222	429982	339057	580742	502992	550797	616863	523391	509125	467756	535290	592883	425539	427363	404784													399963	535103	433487	495248						489275	468617
21.3833								322007	412739	333049	381927	379728	437367	342539	584412	503805	553723	615753	520535	504419	466986	529383	588013	422164	428917	401060													398925	530502	437622	500598						484581	469041
21.4667								322758	404762	332620	380475	383827	433190	339097	582503	508923	555319	609199	524367	509650	475454	529149	588906	422382	432356	400498													394346	532629	431868	493621						486038	468689
21.55								323960	406236	331176	378404	385534	423886	338116	583046	511540	548748	611828	521670	504513	471641	532204	585827	419233	432056	403975													396148	532923	434689	500610						484342	465072
21.6333								321469	402754	327087	375318	384525	432905	340130	579535	503181	547035	610581	517820	501166	464810	531919	587250	418950	427793	401448													395820	529332	436939	499981						484407	467894
21.7167								321716	407595	332558	380521	379995	430861	343735	581824	497637	549419	610604	516672	499869	467977	528899	577792	419114	427879	403229													395438	528116	438136	493476						485403	460422
21.8								324251	403088	331332	375573	379382	430639	340021	586167	504556	553057	602971	515975	499667	463484	531069	581879	420511	425236	402641													395856	530638	435448	493646						483379	460562
21.8833								317443	401052	332252	374584	380869	425094	339491	591726	497308	549015	606458	517460	498229	465243	521675	577976	422010	426036	403831													391310	523861	432511	491774						483779	462190
21.9667								317090	402422	333075	376780	376474	431257	338070	584675	495647	544884	607341	509894	503095	471234	526631	585072	415545	425962	407518													397595	524498	434973	497466						478996	460398
22.05								323358	402431	332270	375878	381871	427212	335355	575531	502130	550097	601469	511674	499265	465674	529207	575670	416878	429354	402216													392969	527946	429746	494006						480228	462207
22.1333								319024	397690	329000	377710	380725	428889	334827	570287	497319	541462	604936	512489	502229	461699	526172	579371																395803	520981	435857	492773						484815	455202
22.2167								318327	402717	332038	372270	379698	421049	335882	577725	491928	548792	600379	513696	493525	463733	526978	580688																393666	523924	434669	495107						478965	460135
22.3								316083	403038	329365	379336	375387	427103	332239	574517	495610	541121	598885	511350	502834	463479	523376	573307																388356	518197	429358	499643						475686	461977
22.3833								316412	400489	329710	377368	383284	430804	330786	577125	496946	540910	601876	506205	496407	461339	523056	578876																391265	522037	427777	490982						479632	463958
22.4667								314367	400291	327492	369651	378198	425372	331238	574329	493955	539764	597638	507360	498611	460317	516976	574711																389697	522571	429879	489963						480125	461535
22.55								316732	397648	328402	375084	376756	423746	331893	574438	490708	542299	598645	507881	498026	457943	524174	579089																385106	517706	422856	496753						481975	458756
22.6333								314225	399844	327277	368862	369335	425925	330872	570791	492671	543267	602763	506590	498141	466737	521963	581512																383929	520422	430173	496218						480409	454707
22.7167								312959	395990	331708	370069	380338	423206	328637	567719	494716	542287	591116	502958	495801	455927	517788	574498																387732	522875	432844	493712						481369	457002
22.8								313890	397784	329416	371975	373201	415986	330323	567103	500296	534930	600158	505385	491117	460853	521006	579851																384950	522045	431376	489266						479941	457242
22.8833								310075	401484	325732	372985	369285	420695	329511	570731	494667	544258	597126	505371	491081	464448	521025	574251																390607	521386	434104	486804						474227	456623
22.9667								313993	390588	328048	370491	373153	418026	326271	567630	487620	539263	591826	505857	496518	458594	512785	573204																386932	521430	425176	497158						479914	451715
23.05								318569	394210	326133	363888	364417	420092	328643	563027	489037	540346	598026	499129	493961	461462	516583	569818																388124	518952	428866	491942						475373	450180
23.1333								318925	390857	320399	369502	373388	415761	327956	566444	486495	540214	594090	499774	485974	453809	519834	573816																384312	516047	428855	482751						475148	453537
23.2167								315783	394953	327581	366426	363313	412775	329179	564620	488556	540764	590179	497808	487884	456158	516258	569237																389675	519629	430379	488966						480813	451904
23.3								309905	393921	325693	371881	371230	412644	326790	562177	484592	532139	590538	491727	483602	457054	520087	568953																385484	517311	427314	484270						477008	456436
23.3833								307116	388117	326838	371452	367877	416242	326782	561741	484381	534567	584562	503024	489516	459160	516693	568222																384324	513818	426216	490544						474589	455270
23.4667								310487	385436	327470	368243	373542	417168	327723	566331	479688	535089	586564	501719	483912	458824	516817	564245																384257	520070	425016	486147						474279	449854
23.55								310683	390116	328178	365146	370921	416469	321370	565754	483218	533998	585950	492203	480507	452124	512108	564491																391104	514557	426336	488600						476217	455999
23.6333								306083	386487	323580	363922	372874	416133	320763	560977	482567	530651	586516	497718	482602	450407	511448	554569																383502	514704	423607	483250						475485	449600
23.7167								311814	386383	320222	365916	365751	409577	320726	556090	480050	527834	587520	496077	480256	454349	508866	571545																380564	515700	421100	485397						470362	448243
23.8								311054	385499	322890	362115	366920	417080	324737	558157	479910	529164	586800	484929	480750	450438	510738	557007																381358	512550	426765	485073						470997	450588
23.8833								300510	383628	321653	358406	362310	413998	323938	553517	478006	531703	580055	492477	481507	458338	511221	563827																381853	510973	426922	481929						471635	441022
23.9667								308169	387630	321962	365060	367185	417194	321600	559804	480001	529915	580238	494950	480114	451887	509446	554925																386816	514222	427137	485531						470278	445043
24.05								311481	382425	320507	368933	366284	414621	321409	552906	474209	525996	588720	489781	483859	445247	503397	558540																378034	514553	425973	483071						469869	451285
24.1333								304167	384590	323450	362559	362681	408777	315083	551183	478525	526262	586198	489963	481118	456644	511978	555657																387496	515570	421380	481632						470299	447479
24.2167								310731	387368	322114	366076	363014	408954	322372	547513	479665	526590	574668	488424	478054	448361	504650	555791																377802	506459	423049	480150						470936	453294
24.3								303096	382079	324970	361349	365839	410635	319692	552947	480280	527594	583013	484100	476929	450722	504356	553487																381190	508586	416775	472850						475740	445038
24.3833								303962	379705	319798	361301	362741	407437	320854	552614	480358	530087	577680	489425	480787	450028	505861	553226																377306	506757	418889	479959						473790	445919
24.4667								300931	378891	321575	361125	364572	406933	315947	551429	475258	531174	579502	487985	476411	448435	510351	554829																378505	509120	423102	476739						467072	442717
24.55								304788	376498	322275	358917	360537	403418	319350	547943	475078	527097	581697	480501	472280	450722	498339	551559																379826	507370	416588	480463						465953	449010
24.6333								304223	373198	318338	357813	361986	402480	317023	550643	470653	528346	576602	482604	470433	447400	501899	547968																380730	507107	417944	478328						464546	445069
24.7167								306180	381222	319010	357672	360452	402195	320347	551965	476462	524776	577052	484556	471927	446381	504811	554312																377407	508417	413833	477481						467405	447517
24.8								302792	375871	320133	364548	361432	401011	320827	542273	467417	525488	579523	485474	469927	447386	497509	548969																375087	499187	417509	475653						464923	442162
24.8833								302383	376101	319474	360705	363043	403422	314436	545329	460619	524574	574293	482204	475912	446644	503493	549379																380117	508873	415668	468751						464647	442412
24.9667								305557	376510	315173	356670	360850	405448	312106	544623	465306	520720	578717	480387	471778	444476	501712	544782																377567	501374	414980	474347						466088	439360
25.05								302516	377080	318979	360804	357957	404413	315372	543011	464416	522673	573743	478878	472719	448846	505719	551482																378298	499060	416811	474637						469438	442699
25.1333								296064	370972	319362	357107	356928	402937	315265	543089	466923	526736	571262	477772	466241	448671	500396	544323																380228	502553	416702	477652						457384	442382
[truncated: 26 more columns]
