# Supplementary material for: Rate-limiting transport of positively charged arginine residues through the Sec-machinery is integral to the mechanism of protein secretion
Source: eLife. 2022 Apr 29;11:e77586. doi: 10.7554/eLife.77586 (PMC9110029; doi:10.7554/eLife.77586)
Supplement: Figure 3—figure supplement 2—source data 1. [file elife-77586-fig3-figsupp2-data1.xlsx]

## Sheet: Sheet1
time from injection (min)	+ATP	-ATP	+ATP	-ATP	-ATP	+ATP	-ATP	+ATP
-8.16667	291	225	250	258	279	242	276	226
-8.1	229	268	236	239	305	261	287	287
-8.03333	248	256	252	277	250	228	280	224
-7.96667	262	266	262	249	266	260	270	257
-7.9	204	240	250	259	225	243	244	244
-7.83333	237	260	221	226	220	244	285	280
-7.76667	235	233	248	261	259	279	291	268
-7.7	220	268	254	250	290	233	255	287
-7.63333	228	186	238	269	271	265	271	253
-7.56667	247	236	272	245	227	244	233	264
-7.5	233	243	287	294	276	245	253	253
-7.43333	276	259	273	238	261	268	228	241
-7.36667	229	259	235	240	252	242	257	245
-7.3	230	246	254	268	273	234	228	229
-7.23333	209	175	278	252	262	250	233	254
-7.16667	263	219	264	257	243	249	226	268
-7.1	240	192	227	201	203	225	232	258
-7.03333	203	217	234	221	226	245	240	199
-6.96667	246	213	275	293	284	308	255	260
-6.9	260	223	253	260	283	239	258	231
-6.83333	250	238	288	270	239	276	213	218
-6.76667	237	209	233	293	242	235	261	260
-6.7	232	248	256	246	214	240	242	208
-6.63333	263	260	252	241	247	244	257	248
-6.56667	261	258	229	225	250	272	238	256
-6.5	242	220	208	234	247	222	275	217
-6.43333	254	214	227	252	246	256	265	214
-6.36667	258	257	285	240	210	220	235	248
-6.3	207	227	223	195	249	248	243	272
-6.23333	266	255	243	243	240	222	214	264
-6.16667	286	263	216	222	211	252	235	222
-6.1	243	221	272	231	273	271	260	226
-6.03333	244	223	214	269	237	267	263	255
-5.96667	247	221	260	251	232	249	251	260
-5.9	237	260	222	238	263	264	253	269
-5.83333	287	249	199	219	251	216	247	248
-5.76667	239	291	214	246	241	244	241	211
-5.7	251	231	238	242	240	227	247	256
-5.63333	238	253	245	245	233	232	263	242
-5.56667	216	223	259	227	233	216	249	243
-5.5	203	234	216	234	285	228	247	224
-5.43333	247	240	251	213	254	242	239	198
-5.36667	286	245	222	221	233	199	206	261
-5.3	260	271	256	256	268	207	260	269
-5.23333	213	254	229	217	230	262	235	202
-5.16667	238	247	276	233	238	242	258	239
-5.1	224	231	227	258	234	248	288	259
-5.03333	222	205	261	239	261	263	236	258
-4.96667	246	264	274	242	236	219	249	269
-4.9	245	233	246	233	207	284	270	215
-4.83333	251	250	253	220	213	242	245	252
-4.76667	235	239	197	230	253	231	243	231
-4.7	239	235	205	226	257	280	243	235
-4.63333	205	228	243	253	224	230	239	233
-4.56667	232	246	215	277	220	236	258	240
-4.5	261	231	246	271	231	255	219	232
-4.43333	253	218	199	221	213	219	219	246
-4.36667	249	240	242	199	258	265	261	235
-4.3	227	219	271	218	225	257	260	231
-4.23333	234	291	223	254	249	277	260	295
-4.16667	267	235	241	231	236	249	245	271
-4.1	211	264	254	205	255	231	231	254
-4.03333	281	241	278	259	201	260	271	220
-3.96667	209	232	290	242	246	235	224	203
-3.9	207	278	196	248	219	265	207	237
-3.83333	222	234	242	227	260	257	235	213
-3.76667	246	214	262	244	269	268	222	223
-3.7	219	226	256	210	284	225	230	234
-3.63333	227	227	252	244	237	277	227	280
-3.56667	252	241	276	229	234	236	240	242
-3.5	233	234	229	218	220	251	241	237
-3.43333	243	258	241	235	232	237	226	253
-3.36667	234	241	197	196	221	215	191	250
-3.3	263	244	244	209	236	272	209	238
-3.23333	233	229	253	251	247	260	229	280
-3.16667	293	233	265	226	215	231	209	288
-3.1	243	246	206	243	208	261	268	245
-3.03333	259	224	266	249	232	202	248	283
-2.96667	249	213	252	224	232	243	217	217
-2.9	263	263	254	215	212	246	211	199
-2.83333	205	222	263	218	256	244	229	295
-2.76667	252	221	231	224	238	268	200	225
-2.7	236	220	225	225	203	255	216	214
-2.63333	217	217	237	242	247	295	267	219
-2.56667	270	236	245	207	227	233	235	204
-2.5	253	234	276	260	263	231	233	234
-2.43333	221	241	247	251	266	265	230	224
-2.36667	281	209	265	212	220	252	242	238
-2.3	233	267	292	226	235	255	233	226
-2.23333	242	210	299	252	217	256	242	244
-2.16667	231	202	235	235	205	251	234	283
-2.1	226	259	218	217	236	256	213	242
-2.03333	242	245	270	212	197	243	218	254
-1.96667	220	247	277	247	216	260	185	251
-1.9	245	234	242	218	258	237	245	230
-1.83333	287	232	238	245	204	247	235	229
-1.76667	229	179	257	255	191	265	271	265
-1.7	248	248	200	244	243	234	206	219
-1.63333	233	231	255	234	236	249	243	278
-1.56667	249	231	271	194	276	260	230	263
-1.5	218	221	232	216	237	246	217	287
-1.43333	247	201	250	197	195	266	237	259
-1.36667	252	232	291	218	250	255	210	231
-1.3	259	206	262	248	282	229	262	289
-1.23333	224	215	301	230	238	271	222	252
-1.16667	244	244	249	233	236	267	227	237
-1.1	232	208	287	194	226	247	237	242
-1.03333	224	247	203	247	241	228	244	272
-0.96667	248	239	248	203	232	275	246	257
-0.9	279	241	218	241	246	236	213	233
-0.83333	228	173	237	220	271	284	218	252
-0.76667	244	198	274	190	254	249	231	250
-0.7	237	238	250	254	208	216	245	232
-0.63333	241	175	266	258	216	221	223	253
-0.56667	271	213	258	204	220	267	234	244
-0.5	223	229	250	247	300	268	243	257
-0.43333	219	219	236	204	215	249	220	223
-0.36667	288	207	246	233	212	228	222	238
-0.3	211	223	247	211	195	273	211	227
-0.23333	255	215	251	211	245	269	252	243
-0.16667	233	215	210	222	204	242	244	230
0
0.16667	3216	3100	3102	3041	3343	3379	3463	3550
0.23333	3706	3534	3854	3553	3790	3934	3926	4034
0.3	4092	4339	4220	4231	4388	4567	4343	4428
0.36667	4878	4597	4758	4717	4806	4831	5039	5026
0.43333	5347	5219	5165	5056	5253	5487	5490	5541
0.5	5855	5693	5811	5380	5748	5935	6002	5891
0.56667	6036	5852	6086	6028	5993	6217	6162	5915
0.63333	6455	6180	6207	6226	6714	6459	6578	6709
0.7	6854	6700	6666	6691	6785	6981	6729	7090
0.76667	7185	7047	6913	6884	6978	7193	7165	7329
0.83333	7773	7305	7158	6986	7461	7585	7343	7451
0.9	8112	7530	7746	7468	7401	7980	7578	7702
0.96667	8274	7902	8081	7630	7911	8106	7907	8298
1.03333	8616	8025	8513	7841	7908	8728	8153	8502
1.1	9095	8480	8981	7968	8104	9297	8449	9038
1.16667	9743	8610	9652	8542	8645	9991	8911	9556
1.23333	10546	8750	10399	8492	8839	10424	8773	10473
1.3	11452	9082	11723	9027	9146	11669	8961	11662
1.36667	12723	9329	12538	9096	9451	12915	9449	12461
1.43333	14299	9499	13979	9296	9380	14241	9520	14400
1.5	15802	9970	16133	9526	10055	16499	9604	16624
1.56667	18177	10063	18941	9637	9808	18996	9760	18849
1.63333	20820	10085	21582	9774	10178	21839	9964	21430
1.7	24094	10107	24924	9905	10189	25159	10599	25016
1.76667	27531	10677	29328	10081	10507	28950	10245	28350
1.83333	32137	10944	33779	10309	10496	34282	10820	33388
1.9	37013	10989	39327	10403	10942	39150	10823	38424
1.96667	42821	11041	45258	10672	11143	45457	10779	44044
2.03333	48537	11008	52118	10920	11302	51944	11090	49749
2.1	55186	11318	58753	11266	11528	58928	11234	55864
2.16667	62822	11413	66419	11027	11687	66306	11681	63570
2.23333	70033	11872	74330	11339	11775	73337	11767	70375
2.3	78003	11879	82460	11473	11839	82132	11647	78795
2.36667	86412	12463	89712	11765	12124	89885	11741	87440
2.43333	94583	12338	99232	11800	12162	97585	12382	95042
2.5	102851	12365	109268	12084	12344	106624	11966	102704
2.56667	111863	12269	114738	12168	12535	113281	12627	108667
2.63333	119760	12958	125271	12198	12443	120723	13000	118654
2.7	127365	13087	131263	12545	12735	129984	13018	124689
2.76667	133870	13260	138797	12685	12877	133159	12805	135182
2.83333	143352	13330	145880	12698	12790	145937	12925	143237
2.9	150170	13387	155967	12632	13181	152407	13301	144662
2.96667	157169	13438	162045	13001	13180	163804	13199	157877
3.03333	167145	13477	175184	13152	13492	172078	13449	162037
3.1	173179	13969	175633	13288	13635	171598	13642	170162
3.16667	177961	13850	180310	13257	13406	183159	13555	175128
3.23333	187608	14002	186835	13565	13548	189927	13873	180784
3.3	194559	14131	196319	13656	13936	197640	13817	186885
3.36667	200623	14286	198793	13532	13820	200360	14002	193250
3.43333	205379	14326	207394	13480	13846	211135	14058	200420
3.5	210303	14487	211031	13696	14231	208850	14237	205810
3.56667	211980	14721	222664	14016	14414	216306	14744	214319
3.63333	222060	14577	228238	14346	14537	223258	14384	216806
3.7	224205	14642	230587	14243	14721	230852	14966	220057
3.76667	233603	14909	233865	14536	14616	231647	14619	227662
3.83333	236451	15198	238067	14595	14874	234719	14834	228785
3.9	244927	15389	244598	14284	14775	243046	14960	238330
3.96667	247986	15222	246272	14489	15114	247538	15269	239972
4.03333	250353	15512	250402	14993	14992	248594	15229	244480
4.1	253282	15873	256177	14708	15268	256061	15141	245764
4.16667	258499	15496	256260	15169	15312	261416	15497	252512
4.23333	258669	15683	261447	14902	15179	267167	15537	254890
4.3	264884	15668	263866	14915	15055	262215	15320	262984
4.36667	270894	15735	271126	15283	15071	268578	15830	257135
4.43333	272790	16367	274668	15429	15406	268405	15505	262880
4.5	272291	16092	276189	15649	15615	273925	16068	271569
4.56667	275997	16009	275926	15274	15821	281323	15862	275473
4.63333	281185	16526	279487	15396	15869	279961	15738	275655
4.7	282685	16404	283487	15563	16083	286176	16435	280698
4.76667	285881	16534	282071	15685	16180	287838	16146	277195
4.83333	288347	16553	285269	15530	16143	291164	16306	282595
4.9	286832	17001	290344	15834	16044	285954	16665	281714
4.96667	294777	16693	293747	15647	15991	290500	16689	286061
5.03333	297920	16977	297445	16184	16503	293492	16550	292406
5.1	297959	16579	296824	16159	16636	292545	16756	288697
5.16667	297123	17050	298467	16017	16331	298082	16453	290364
5.23333	303238	17381	299312	16543	17003	302872	16999	295082
5.3	303489	17263	301740	16065	16595	301419	17119	295642
5.36667	306933	17477	303639	16405	16841	305355	16958	299879
5.43333	307486	17217	304707	16411	16759	302190	17216	299277
5.5	307508	17364	308658	16651	16731	309394	17075	298414
5.56667	312268	17654	310225	16752	17337	308562	16609	300275
5.63333	311135	17628	307205	16697	16939	302790	17327	307074
5.7	316298	17799	302886	16497	17164	313469	17188	305740
5.76667	312375	17694	306754	17111	17331	310477	17549	301673
5.83333	312933	17699	312661	16796	17171	313882	17422	305668
5.9	313693	17636	312729	17019	17266	315191	17690	305085
5.96667	318607	18059	314606	16993	17443	317660	17524	310674
6.03333	319087	17710	318326	17214	17603	314112	17911	312554
6.1	321453	18193	315818	16874	17410	317877	17830	311609
6.16667	323264	18316	324777	17179	17657	316993	17716	316844
6.23333	325793	18345	320325	17307	17829	318999	17891	312835
6.3	326553	18315	321496	17380	17330	319278	17629	314830
6.36667	325367	18316	317982	17167	17632	324596	17755	320598
6.43333	324431	18881	323376	17531	17867	322224	17899	314082
6.5	326013	18219	320250	17778	17958	322886	17895	318780
6.56667	323260	18315	328351	17684	17777	320859	17884	321979
6.63333	325886	18800	327062	17659	18037	318826	18091	319467
6.7	331170	18581	329532	17855	18018	327796	18265	321318
6.76667	330058	18278	332729	17773	18357	328257	18158	323450
6.83333	328639	18560	329226	17984	17916	328183	18509	326790
6.9	328425	19018	326980	18193	18352	323755	18613	327050
6.96667	334436	18948	329443	17686	18585	329339	18855	323538
7.03333	331991	19181	329894	18182	18610	333243	18396	323419
7.1	331624	18768	336878	18144	18542	331321	18641	326800
7.16667	331232	19182	327592	18080	18523	328725	18925	327440
7.23333	332234	19062	330418	18296	18570	334918	18694	328249
7.3	333645	18731	334463	18195	18514	330591	18651	329463
7.36667	337166	19258	327680	18288	18624	331436	19044	327515
7.43333	338547	19162	328709	18630	18728	331544	18842	328483
7.5	338822	19237	334266	18016	18154	335073	18898	330827
7.56667	339120	19593	338797	18444	19007	335566	19170	331391
7.63333	334448	19412	331623	18247	18780	334141	18988	329286
7.7	341208	19730	336126	18605	19026	331118	19244	330022
7.76667	337739	19518	336909	18271	19243	336668	19190	337140
7.83333	338978	19584	333820	18943	19089	337574	19175	331962
7.9	339181	19857	333921	18693	19115	335332	19240	333990
7.96667	340115	19778	340668	18755	18716	341614	19497	337216
8.03333	339597	19932	339185	18931	19004	335380	19444	339465
8.1	337254	19796	338929	18844	19438	336331	19416	341000
8.16667	341487	19760	336179	18695	19101	339953	19440	337628
8.23333	344222	19799	338981	19207	19024	344322	19520	333942
8.3	342001	20039	341116	19217	19482	340122	19590	333866
8.36667	338719	19792	336485	18850	19583	335957	19528	339920
8.43333	346092	20029	340126	18752	19516	344003	19769	337687
8.5	348505	20022	340559	18954	19449	344084	19612	337859
8.56667	347505	19868	344032	19270	19701	340368	19373	340573
8.63333	343595	20042	340405	19302	19777	339125	19756	344340
8.7	342695	20197	341288	18959	19411	339953	19867	338920
8.76667	344660	20288	341272	19310	19634	342176	19660	340380
8.83333	346845	20545	343478	19313	19655	345626	19964	336909
8.9	341895	20183	340069	19365	19198	351030	20223	337442
8.96667	344099	20103	342133	19272	19965	343898	20165	335823
9.03333	344517	20570	339745	19335	20094	340500	19985	344625
9.1	344568	20607	341115	19404	19856	338748	20022	340385
9.16667	351700	20489	342053	19272	20018	340802	19870	342201
9.23333	347662	20412	345985	19817	20070	344325	20177	343226
9.3	350845	20757	343897	19549	20084	343031	20234	337311
9.36667	348634	20563	343908	19601	20069	345485	20649	342293
9.43333	345585	20577	342572	19733	19985	341438	20172	341883
9.5	343745	20865	341655	20129	20280	345380	20218	345152
9.56667	347433	20389	342343	19751	20114	348794	20434	339312
9.63333	353311	20744	341144	19832	20320	344170	20236	343703
9.7	347677	20889	339137	19832	20108	349409	20488	346431
9.76667	342777	20915	343544	20028	19892	345289	20271	342777
9.83333	342636	21047	344198	19693	20349	342525	20307	340676
9.9	354806	21723	342631	19785	20503	346063	20102	345142
9.96667	352157	21153	347718	19932	20413	344415	20658	344839
10.0333	350795	20941	344211	20098	20284	340433	21012	342168
10.1	346905	21152	349105	19759	21028	345208	20832	339764
10.1667	349687	21194	340063	19801	20596	343097	20928	345449
10.2333	352311	21233	346180	20309	20613	342963	20991	342995
10.3	350653	21050	346104	20216	20364	352846	20852	342497
10.3667	350306	21254	345111	20326	20635	343060	20502	348198
10.4333	349401	21281	344620	20269	20903	342753	21259	337267
10.5	352379	21024	342907	20574	20560	350265	20546	342494
10.5667	347803	21233	343785	20412	20753	350396	21144	345370
10.6333	356343	21492	344865	20245	20984	342897	21012	343106
10.7	354907	21642	341850	20299	20660	342509	20757	347370
10.7667	350597	21550	350411	20486	20718	345967	20970	347197
10.8333	351920	21219	346728	20932	21015	348002	20791	348759
10.9	349205	21500	343088	20879	20737	347551	21140	342411
10.9667	350305	21601	344753	20640	20775	344792	21112	344277
11.0333	357129	21878	346040	20421	20831	343907	20922	344189
11.1	349885	21473	344967	20783	21024	346489	21307	347373
11.1667	349425	21327	348702	20955	21073	347931	21273	348017
11.2333	350519	21538	346099	20599	21151	346878	21422	342404
11.3	348355	21433	342565	20620	20801	346026	21208	344283
11.3667	351387	21655	340548	21132	20534	350230	21224	340120
11.4333	346138	21984	344392	20827	20741	349114	21074	349726
11.5	348332	21526	345149	21036	20906	346193	21439	347452
11.5667	350372	21483	339029	21114	21166	346920	21161	345734
11.6333	349943	21467	345685	20775	21263	346452	21427	340574
11.7	347678	21869	348717	20888	21233	344378	21074	344880
11.7667	349436	21823	348429	20722	21301	349524	21480	341510
11.8333	343945	21565	343690	20941	21499	347922	21629	342014
11.9	350432	21865	343647	20966	21902	345933	21804	341895
11.9667	352099	22008	349947	21154	21251	348769	21549	344686
12.0333	350701	21826	344881	20537	21093	343525	21593	345439
12.1	348201	22278	347606	21180	21481	345812	21550	346747
12.1667	353674	22226	347516	21113	21373	346221	21770	344438
12.2333	348584	22154	346851	21074	21466	346887	21762	339411
12.3	344780	22099	347077	21024	21785	340588	21595	342871
12.3667	353104	22213	345014	21321	21424	342300	21697	346948
12.4333	353228	22178	342813	21163	21246	342865	21655	345815
12.5	349766	22355	346389	21009	21270	343827	21591	344575
12.5667	348120	22051	345297	21083	21594	344726	22331	346681
12.6333	350999	22049	341066	21173	21923	344105	21841	338427
12.7	348642	22060	341289	21423	21503	350458	21872	339512
12.7667	349384	22091	347124	21340	21657	340385	21821	348821
12.8333	352167	22853	340812	21007	21674	342236	21901	344678
12.9	352716	22395	345232	21387	21871	340034	21919	347692
12.9667	351177	22264	342864	21093	21972	340189	21808	341157
13.0333	352375	22107	344199	21470	21770	339101	22166	341131
13.1	351103	21888	339602	21572	21873	343218	21831	338241
13.1667	348557	22421	339346	21499	21626	343049	22238	344863
13.2333	349310	22772	344019	21796	21650	347043	22239	341344
13.3	347269	22678	340992	21381	21927	341149	22192	340560
13.3667	345059	22477	339468	21156	21670	340533	21860	344902
13.4333	350084	22541	341093	21220	22038	342238	22056	340865
13.5	347042	22510	339519	21509	22329	343702	22272	346148
13.5667	345435	22355	340613	21380	21744	339498	22406	343604
13.6333	346368	22249	342202	21366	21989	340691	22072	341162
13.7	345958	22630	341683	21528	22024	340900	22197	343213
13.7667	348228	23060	337562	21205	22326	342180	22066	337712
13.8333	343478	22836	344069	21971	21936	344139	22558	342871
13.9	348770	22333	341793	21781	22092	338562	22289	341250
13.9667	346406	22447	338168	21641	22100	344839	22057	338711
14.0333	345396	23040	333628	21826	21831	344462	22245	339414
14.1	340521	22788	342288	21386	22515	341987	22527	338503
14.1667	343150	22437	339519	22381	22211	342332	22276	337387
14.2333	345386	22874	339281	21496	22362	342225	22248	341051
14.3	339920	22690	337940	22115	22498	345101	22444	338256
14.3667	343679	23052	336379	21852	22228	339014	22465	345501
14.4333	349525	22737	338638	22164	22458	338815	22557	341889
14.5	342807	23199	334076	21756	22048	339844	22317	335726
14.5667	342284	23246	333604	21618	22398	338153	22805	337004
14.6333	345519	22846	330030	21817	22419	338109	22415	339768
14.7	340023	23138	336672	21682	22620	342846	22357	333659
14.7667	343462	23188	336358	22254	22459	341268	22471	335071
14.8333	341085	22602	333113	22176	22361	338641	22598	337653
14.9	344328	23253	336964	22184	22668	338368	22572	338142
14.9667	340437	22842	335265	21676	22263	334151	22668	334443
15.0333	339386	23131	335593	21989	22632	335457	22604	336636
15.1	342056	22760	334478	22300	22299	332935	22967	334992
15.1667	341166	23139	334293	22158	23026	339069	22563	333558
15.2333	339661	23070	335709	22072	22535	332193	22645	337458
15.3	342950	23200	331568	22175	22458	340021	22589	334739
15.3667	337310	22872	333545	22267	22658	332827	22249	338271
15.4333	342304	22984	331635	22050	22868	337983	22665	334433
15.5	344919	23301	336021	22159	22556	337652	22519	334741
15.5667	339821	23283	329632	22090	22762	334121	22862	333632
15.6333	341263	23384	333916	22238	22658	336104	22877	332882
15.7	341917	23456	325942	22190	22621	328533	22849	337793
15.7667	344791	23495	333489	22025	22430	332356	22702	334162
15.8333	337042	23167	331986	22515	22690	334391	22820	331128
15.9	339531	23485	335515	21944	22758	332226	22671	332562
15.9667	334581	23469	332229	22430	22871	339632	22984	327843
16.0333	335541	23465	329363	22376	22688	333032	22851	332675
16.1	335906	22910	330980	22293	22725	328631	22267	332093
16.1667	335210	23410	328737	22477	22578	331883	23010	333186
16.2333	337574	23491	330960	22170	22669	330107	22906	328546
16.3	334400	23056	329087	22474	22867	328553	22913	331969
16.3667	343841	23523	326303	22455	22924	331329	23138	338582
16.4333	333424	23594	331627	22397	22518	329973	22963	330822
16.5	336351	23795	329887	22395	22557	326434	23185	325158
16.5667	335130	23467	328341	22540	22718	333272	22997	333541
16.6333	331141	23546	327270	22715	22938	327883	22726	330492
16.7	335150	23097	329150	22339	22589	331092	23054	334783
16.7667	331881	23208	329232	22229	23033	325651	23125	331411
16.8333	332752	23516	325434	22365	23205	330889	23338	327438
16.9	332021	23382	327820	22652	22822	334195	23241	328707
16.9667	333366	23213	327616	22947	22518	331846	22934	329807
17.0333	331598	23940	326417	22430	23026	334830	23121	324696
17.1	331515	23775	328940	22486	23050	330864	23052	330593
17.1667	333646	23631	324303	23024	22928	327397	23097	327854
17.2333	329366	23905	329144	22124	22893	332591	22855	331162
17.3	333375	23378	323961	22723	23174	330946	23237	326369
17.3667	333768	23380	329992	22711	23037	328083	23187	328358
17.4333	338168	23799	328185	22839	23077	331249	23232	330601
17.5	331892	23313	324859	23038	23062	323104	23659	329483
17.5667	333538	23818	328438	22497	22887	327018	23254	328670
17.6333	334879	24140	327599	23012	22901	328899	22853	326322
17.7	333387	23476	323169	22788	23055	327327	23549	323070
17.7667	331136	23566	325020	22928	23089	323656	23373	327518
17.8333	327425	23890	327040	22760	23473	322700	23327	319843
17.9	330011	23686	321510	22894	22984	328979	23159	331135
17.9667	333959	23874	319519	22566	22881	324524	23529	327048
18.0333	328592	23396	324453	23030	23074	326920	23234	327628
18.1	326754	23886	321861	23093	23089	328770	23132	326119
18.1667	331340	23958	325109	22963	23058	325122	23320	322666
18.2333	329770	23613	319760	22771	23404	321151	23325	323074
18.3	328272	23915	320022	22694	23075	320658	23246	325014
18.3667	332399	23867	320965	22713	23394	325125	23244	322777
18.4333	328485	23820	321745	22999	23353	323741	23462	318621
18.5	322555	23995	316722	22638	23157	320413	22940	324063
18.5667	328157	23758	324286	22787	23208	323381	23378	323002
18.6333	326696	23450	319238	22964	23156	325178	23607	323187
18.7	324383	23596	321901	22882	23157	319733	23660	322270
18.7667	330175	23715	318708	22893	23138	323536	23722	326309
18.8333	331455	24075	322029	22859	23304	326507	23555	322065
18.9	328375	23689	318982	22760	23747	322189	23727	321351
18.9667	328772	24170	320740	23331	23455	319544	23442	321542
19.0333	327559	23712	317671	22762	23152	319576	23274	321883
19.1	323766	24006	320243	23152	23370	321511	23499	321073
19.1667	321913	24158	319248	23207	23547	325656	23769	320853
19.2333	329374	23675	320725	23150	23171	321205	23590	320039
19.3	327470	24135	314326	23048	23319	318927	23336	318946
19.3667	322427	23651	318272	23130	23617	319024	23531	319519
19.4333	323552	24097	320478	23172	23999	317970	23612	318321
19.5	324333	23970	316853	22994	23664	316801	23685	316394
19.5667	322135	24199	316512	22631	23636	316640	23759	321118
19.6333	320226	23802	315830	23193	23337	320720	23505	318223
19.7	326812	24030	313635	23243	23338	315582	23533	319342
19.7667	320506	24326	314171	23222	23777	315556	23443	316704
19.8333	315972	23983	312702	23012	23287	322901	23082	316641
19.9	327697	24072	314177	22791	23888	322509	23853	317258
19.9667	319147	24768	320318	22975	23305	317959	23597	318116
20.0333	323768	24346	316296	22933	23447	318942	23939	313727
20.1	316643	23772	312972	23222	23435	314656	23105	315521
20.1667	319680	24061	310260	23163	23253	316077	23582	313996
20.2333	316493	23763	314473	23192	23233	313597	23742	315252
20.3	319519	23780	311560	22970	23302	315367	23411	316402
20.3667	321944	24396	313732	23063	23803	312917	23565	318994
20.4333	323578	24600	310800	22976	23715	312180	23476	315022
20.5	320381	24160	314062	22976	23346	314369	23814	315550
20.5667	318414	24415	314533	23006	23874	312507	23980	316298
20.6333	317056	24123	312462	23190	23879	312135	23419	309831
20.7	316201	24235	309731	23191	23780	315780	23924	313460
20.7667	315807	24298	313027	23210	23384	314866	23821	312581
20.8333	319110	24362	306545	23321	23885	313196	23552	312304
20.9	313852	24334	311288	23579	23585	314848	23814	313320
20.9667	313117	24445	310916	23262	23345	309431	23691	316489
21.0333	316996	23974	309169	23076	23668	312731	23793	308797
21.1	308492	24350	314426	23105	23577	310453	24040	311230
21.1667	320812	24492	310182	23497	23946	313885	23586	313597
21.2333	316585	24494	309224	22902	23464	304988	23343	311592
21.3	314466	24439	305690	23482	23828	312229	23672	309746
21.3667	314718	24032	307777	23258	23898	312980	23767	308115
21.4333	312731	24301	306336	23831	23796	312685	23624	305271
21.5	317713	24490	306776	23729	23812	304974	23852	311746
21.5667	317907	24032	304772	23601	23579	308608	23859	308225
21.6333	314379	24774	305707	23497	23849	307619	24016	313403
21.7	310916	24346	304428	23411	23898	311382	23846	310123
21.7667	311403	24171	309658	23048	23641	309491	24035	310461
21.8333	316574	24233	302638	23600	23378	311060	23885	309022
21.9	312403	24284	306279	23154	24152	304864	23868	305542
21.9667	309726	24595	303850	23573	23817	307800	24062	301642
22.0333	314051	24575	304921	23190	23875	309497	23875	304508
22.1	310252	24362	306969	23420	23965	305946	23801	304289
22.1667	309414	24371	298977	23111	23836	303349	23604	307152
22.2333	312230	24273	302703	23017	23670	306503	24176	302510
22.3	310506	24582	298703	23495	23873	306443	23928	308131
22.3667	308452	24471	298783	23328	23575	301355	24068	304991
22.4333	307659	24579	304169	23789	24037	306925	23929	300636
22.5	306680	24348	305855	23568	23776	306004	24236	302126
22.5667	309550	24863	302256	23801	23860	304605	23910	304820
22.6333	308180	24742	304264	23418	23845	300609	24413	302145
22.7	307372	24473	301872	23211	23720	306411	23970	301611
22.7667	306794	24847	295786	23151	24111	305696	23800	306002
22.8333	311057	24289	307349	23530	23922	305822	23882	306210
22.9	307950	24868	296020	23212	23799	305377	24013	299091
22.9667	303290	24679	296607	23538	23964	304552	24307	306909
23.0333	303511	24329	303106	23300	24138	302288	23727	305331
23.1	302595	24550	297791	23565	23735	303406	24240	304401
23.1667	302652	24548	296156	23598	23919	300218	24118	298083
23.2333	303705	24465	302615	23772	23826	301426	24470	300817
23.3	301226	24519	296981	23795	23787	302833	23580	302839
23.3667	305376	24820	299625	23457	23697	300439	24035	300157
23.4333	306690	24575	301287	23793	24021	301660	23746	301693
23.5	308398	24313	299665	23658	23792	302431	24504	298383
23.5667	304254	24488	296502	22958	24162	305989	24253	297605
23.6333	302529	24947	297592	23366	23848	297433	24169	295552
23.7	300949	24924	297066	24000	24262	297720	24157	297648
23.7667	301164	24382	298047	23646	23806	297646	24255	300028
23.8333	299672	24856	302257	23811	23937	298666	24222	299036
23.9	301754	24722	297243	23507	24007	297801	24020	297861
23.9667	301041	24942	296969	23569	23462	298783	24119	298205
24.0333	301750	24101	297612	23344	24106	299831	24218	297732
24.1	302692	24395	294071	23841	23534	296451	24185	297459
24.1667	304911	24543	294026	23415	23917	296096	23889	290087
24.2333	303089	24677	294036	23741	24261	294376	24124	296350
24.3	297881	24654	293242	23801	23569	293803	24081	297609
24.3667	299312	24336	292927	23501	23996	291649	23748	293159
24.4333	297355	24353	295005	23601	23781	292546	23601	296782
24.5	297888	24474	294860	23665	23723	290986	23903	297331
24.5667	300391	24960	290916	23679	23904	293566	24242	292504
24.6333	299271	24366	293894	23681	23857	297654	24197	291109
24.7	298107	24456	288066	23662	23793	294702	23958	291980
24.7667	296003	24578	287767	23251	24401	287411	23702	295781
24.8333	299688	24516	292718	23690	23539	291985	23901	294791
24.9	298349	24683	287571	23601	23857	296790	23975	294834
24.9667	292640	24692	289760	23281	24044	287224	24302	291864
25.0333	298123	24572	287784	23638	24320	297717	24532	290112
25.1	293376	24611	287301	23994	24194	296744	24347	288497
25.1667	294257	24557	285859	24001	23902	293660	24423	292118
