# Supplementary material for: Rate-limiting transport of positively charged arginine residues through the Sec-machinery is integral to the mechanism of protein secretion
Source: eLife. 2022 Apr 29;11:e77586. doi: 10.7554/eLife.77586 (PMC9110029; doi:10.7554/eLife.77586)
Supplement: Figure 3—figure supplement 2—source data 2. [file elife-77586-fig3-figsupp2-data2.xlsx]

## Sheet: Sheet1
time from injection (min)	4 µM	2 µM	1 µM	0.5 µM	0.25 µM	0.125 µM	0.0625 µM	0 µM
-8.1	11299	7448	2290	2395	1797	1145	1079	663
-8.01667	11703	7904	2510	2545	1888	1342	1081	627
-7.93333	12092	8395	2569	2676	2060	1375	1049	633
-7.85	12468	8822	2636	2806	1996	1391	1152	596
-7.76667	12848	8999	2762	2917	2083	1331	1218	645
-7.68333	13649	9424	2868	3050	2189	1419	1163	599
-7.6	13852	9717	3014	3163	2209	1387	1195	604
-7.51667	14002	9942	3040	3174	2323	1451	1308	583
-7.43333	14544	10536	3174	3366	2431	1453	1280	635
-7.35	14659	10720	3212	3329	2559	1563	1223	673
-7.26667	14923	10936	3308	3432	2337	1512	1411	610
-7.18333	15509	11018	3351	3585	2515	1564	1257	652
-7.1	16169	11081	3464	3550	2554	1646	1334	605
-7.01667	15972	11495	3445	3589	2743	1687	1434	607
-6.93333	16176	11551	3635	3645	2643	1728	1409	646
-6.85	16381	11799	3429	3672	2744	1648	1497	640
-6.76667	16774	12159	3648	3782	2723	1766	1480	610
-6.68333	17034	12555	3748	3919	2907	1830	1462	603
-6.6	17155	12396	3744	4065	2825	1784	1472	614
-6.51667	17501	12817	3721	3999	2951	1857	1584	608
-6.43333	17869	12811	3846	3906	2892	1807	1592	628
-6.35	18064	13003	3707	4061	2879	1795	1535	622
-6.26667	17628	13135	4034	4391	2975	1865	1538	643
-6.18333	18256	13303	3972	4218	3110	1891	1561	620
-6.1	19081	13409	4123	4263	3019	1970	1670	612
-6.01667	18900	13918	4111	4353	3159	1948	1640	575
-5.93333	18759	13797	4231	4332	3188	1970	1665	578
-5.85	19018	13983	4273	4320	3320	2044	1696	645
-5.76667	19272	13901	4295	4564	3193	1994	1746	656
-5.68333	19254	14304	4084	4524	3340	2090	1583	647
-5.6	19830	14336	4429	4579	3183	2163	1782	677
-5.51667	19901	14793	4465	4818	3464	2034	1709	618
-5.43333	20111	14725	4401	4526	3420	2040	1827	552
-5.35	19853	15024	4357	4712	3400	2104	1707	680
-5.26667	20331	15108	4592	4861	3585	2079	1803	623
-5.18333	20283	15328	4515	4857	3592	2156	1782	654
-5.1	20491	15213	4663	4890	3591	2156	1886	627
-5.01667	20788	15375	4606	4922	3478	2103	1933	559
-4.93333	20894	15583	4650	4949	3528	2385	1823	659
-4.85	20833	15382	4642	4939	3590	2240	1844	593
-4.76667	21188	15840	4694	4835	3745	2137	1917	559
-4.68333	21517	15829	4775	5014	3736	2409	1777	596
-4.6	21511	15964	4894	4936	3676	2310	1893	622
-4.51667	21789	16223	4858	5105	3922	2168	1907	563
-4.43333	22066	16022	4911	5191	3815	2336	1945	646
-4.35	22327	16391	4782	5207	3801	2365	1886	627
-4.26667	22036	16511	4902	5263	3911	2413	2054	610
-4.18333	22065	17100	4994	5573	3975	2428	1929	617
-4.1	21972	16601	4949	5113	3957	2387	2003	582
-4.01667	22460	16724	4959	5397	3835	2381	1937	641
-3.93333	22886	16551	5230	5590	3886	2435	1999	640
-3.85	22807	17007	5089	5516	4056	2360	2001	608
-3.76667	22692	16950	5208	5460	3931	2508	2071	581
-3.68333	23438	17362	5208	5479	4058	2385	2106	641
-3.6	23451	17645	5248	5595	4273	2489	2117	536
-3.51667	23509	17649	5253	5653	4018	2629	2103	582
-3.43333	23492	17588	5221	5714	4148	2500	2119	588
-3.35	23831	17428	5339	5606	4084	2631	2067	624
-3.26667	23832	17383	5570	5590	4205	2468	2088	627
-3.18333	24438	17456	5407	5776	4152	2537	2155	560
-3.1	24487	17934	5336	5737	4112	2633	2155	660
-3.01667	24288	18113	5517	5788	4155	2600	2174	600
-2.93333	24371	18040	5452	5959	4354	2509	2131	655
-2.85	24538	18147	5462	5616	4291	2767	2259	680
-2.76667	24582	18479	5679	5721	4266	2545	2184	556
-2.68333	24857	18292	5603	5949	4351	2690	2262	602
-2.6	24773	18178	5640	6067	4295	2808	2256	599
-2.51667	24948	18562	5547	5920	4397	2758	2255	616
-2.43333	25211	18598	5625	5947	4371	2722	2253	586
-2.35	25731	18666	5565	5984	4417	2633	2218	613
-2.26667	25448	18705	5927	5954	4365	2694	2259	655
-2.18333	25634	18870	5732	6034	4494	2732	2172	635
-2.1	25299	19149	5590	6051	4432	2891	2275	556
-2.01667	25859	19053	5843	6180	4461	2784	2347	593
-1.93333	25574	19032	5908	6110	4421	2681	2391	617
-1.85	25687	19373	5926	6214	4492	2743	2305	618
-1.76667	26115	18862	5970	6145	4496	2728	2290	611
-1.68333	26141	19111	5958	6156	4596	2854	2332	591
-1.6	25941	19267	5954	6134	4597	2763	2412	581
-1.51667	26388	19133	5854	6175	4626	2787	2408	602
-1.43333	26670	19091	5915	6398	4716	2755	2294	592
-1.35	26546	19477	6024	6341	4873	2803	2336	614
-1.26667	26836	19873	5960	6356	4715	2932	2385	577
-1.18333	26620	19436	6086	6151	4728	2972	2278	578
-1.1	26937	20137	6028	6419	4633	2785	2302	581
-1.01667	27221	19874	6193	6351	4842	3012	2304	577
-0.93333	27114	20253	5953	6510	4553	2929	2518	579
-0.85	27509	20042	6165	6428	4669	3048	2381	599
-0.76667	27686	20406	6020	6605	4691	2957	2574	636
-0.68333	27034	20452	6122	6539	4844	2958	2378	610
-0.6	27426	20190	6140	6516	4938	2969	2418	644
-0.51667	27449	20076	6103	6472	4652	2943	2513	615
-0.43333	27558	20367	6388	6619	4967	2951	2511	622
-0.35	28074	20082	6211	6592	4979	3034	2387	616
-0.26667	27865	20387	5983	6497	4931	3173	2395	567
-0.18333	27689	20494	6191	6552	4991	3121	2517	578
-0.1	28148	20629	6290	6629	4733	3079	2511	587
0
0.13333	26232	19571	6123	6438	4915	3036	2351	650
0.21667	26579	19455	6027	6247	4842	3099	2501	677
0.3	26744	19674	6082	6447	4884	3041	2494	670
0.38333	26919	19314	6012	6493	4816	3120	2588	726
0.46667	27196	19499	6013	6549	4738	3049	2460	738
0.55	27047	19422	6290	6484	4736	3006	2528	715
0.63333	27200	20024	6336	6252	4983	3021	2487	660
0.71667	27168	19855	6328	6869	4975	3270	2544	679
0.8	28046	20238	6585	6982	5048	3202	2664	677
0.88333	28585	20789	6925	7286	5530	3367	2798	676
0.96667	29596	22415	7446	8161	5951	3712	3104	756
1.05	31741	24286	8869	9279	6895	4404	3470	726
1.13333	34763	27412	10580	11300	8459	5084	4144	675
1.21667	39439	32901	13448	14057	10586	6436	5173	712
1.3	46019	39650	17234	18103	13660	8017	6457	754
1.38333	54611	48737	22374	23166	17847	10096	8103	806
1.46667	64512	59432	28948	29837	22445	12801	10403	741
1.55	77259	72608	37258	38003	28753	16613	13462	807
1.63333	91472	86785	46618	48592	36718	20896	16918	792
1.71667	106100	103793	57532	59469	45051	25794	20730	800
1.8	122843	118513	69863	71832	55354	31185	25238	781
1.88333	136697	138287	82315	86425	65236	37765	29720	810
1.96667	153893	156527	96486	99350	76825	44116	36043	889
2.05	173112	172298	109113	112021	89604	52260	41282	941
2.13333	187052	188250	124289	130054	101568	59874	47559	861
2.21667	198231	206687	135662	142418	113641	68176	53417	968
2.3	217428	219247	151381	153795	126107	75974	60930	986
2.38333	229494	235390	163707	168742	138574	84157	67555	972
2.46667	245032	248620	177402	179839	151205	92421	74277	1026
2.55	257030	266163	187712	196706	163445	102140	81549	1010
2.63333	269165	277542	201700	207522	173318	108743	89024	1014
2.71667	283121	283982	213431	218192	181225	113855	95186	1025
2.8	294285	298371	225012	227870	191942	123939	102135	1045
2.88333	300705	309984	235392	240345	205214	131115	107738	1090
2.96667	308703	313277	237748	246279	213130	136994	112286	1120
3.05	318119	324007	252965	251941	220084	147944	122826	1075
3.13333	322777	331331	254864	263560	229483	154582	126553	1130
3.21667	334064	340322	266014	269797	236515	158445	129492	1093
3.3	340457	347648	271394	273238	242700	164480	138968	1259
3.38333	347095	350705	277372	284027	247797	170838	139100	1254
3.46667	350687	354979	282893	289780	253603	176158	144410	1182
3.55	366445	361144	292384	292391	261530	182632	152862	1205
3.63333	363702	367314	295180	300036	264641	189741	154234	1210
3.71667	370188	370132	303873	306081	273930	191595	159003	1320
3.8	374731	372929	307405	314669	281673	200439	165063	1310
3.88333	378862	387078	309256	320975	282630	202785	167701	1430
3.96667	380263	387642	313759	323551	287881	204143	172667	1293
4.05	379837	384455	318973	324788	292411	209610	174048	1317
4.13333	390211	386925	320506	326786	295078	215638	180376	1330
4.21667	385222	393118	324552	331284	297017	220467	184397	1388
4.3	391378	396976	323464	327271	300873	223490	189291	1376
4.38333	399953	404143	331487	335940	305553	224085	190113	1398
4.46667	397729	396982	330759	334465	309305	228322	194183	1412
4.55	399255	410685	333996	338647	305005	229382	195271	1405
4.63333	397906	403713	338324	336735	312066	239115	197595	1423
4.71667	408081	406810	339450	342923	311279	238489	203854	1464
4.8	407476	406923	342446	344440	313138	239118	205407	1473
4.88333	409253	413873	342960	343719	318345	241336	206517	1507
4.96667	408491	409162	344483	348238	317147	243743	205558	1521
5.05	415114	412000	342719	350141	316385	249865	212753	1543
5.13333	408356	416464	345819	355131	324224	250640	213249	1463
5.21667	417933	413591	352057	354635	328688	252556	216990	1549
5.3	416717	414191	346809	354965	328879	257148	215389	1552
5.38333	416831	419357	351822	357073	331501	254840	217397	1579
5.46667	413122	420373	357104	358986	328958	254741	221932	1526
5.55	422279	420500	355744	351061	333265	255783	222193	1528
5.63333	423015	422077	352206	357708	329630	263949	227874	1581
5.71667	425801	420580	357260	364471	334538	264684	226359	1516
5.8	418468	426111	359515	359833	336638	268185	227508	1539
5.88333	427620	425044	358426	363641	334681	265120	229503	1565
5.96667	431743	425440	355528	365291	338371	270733	231342	1587
6.05	427267	426448	358242	367441	338931	267702	237131	1592
6.13333	428251	424159	360195	368149	342202	270163	229281	1653
6.21667	428834	429643	357323	369183	344944	275175	236582	1719
6.3	431455	429822	361298	369372	336142	273726	237363	1725
6.38333	432071	427111	361746	367110	345575	278623	237050	1858
6.46667	431907	431035	365504	370372	344693	273462	239535	1721
6.55	430550	431810	367029	369638	345459	275750	245913	1762
6.63333	429334	430382	368343	368459	343798	280338	238467	1694
6.71667	435184	434379	369524	374264	345999	278613	244603	1688
6.8	435635	432648	372693	369319	347596	281315	243750	1697
6.88333	438703	435120	366619	373008	348773	279571	245206	1678
6.96667	432167	434422	367443	374035	351729	279344	246336	1780
7.05	434688	433770	371930	369042	346871	283243	246304	1769
7.13333	437856	430699	370337	375291	347013	283039	248676	1708
7.21667	437108	431334	371149	375922	350262	285041	250687	1774
7.3	436754	440115	374906	375624	356007	287934	251568	1810
7.38333	439931	437187	372143	379290	350343	290033	253644	1787
7.46667	439093	438290	374919	371647	353820	284131	252290	1773
7.55	437575	436901	373789	377157	349850	288493	256194	1830
7.63333	437512	439353	373516	376466	349975	287267	253711	1749
7.71667	442486	432775	373294	375787	356379	288573	256005	1792
7.8	440785	436833	376244	379829	358928	292508	254921	1817
7.88333	441151	440339	375483	383358	355708	292438	256091	1814
7.96667	440142	441600	380153	381218	360535	289854	259096	1827
8.05	442690	439701	371761	381650	357337	295750	258773	1852
8.13333	439789	437359	374546	383436	354424	293981	260570	1876
8.21667	438927	440222	382320	379440	354480	297497	259005	1899
8.3	439976	439137	381329	380234	356968	298829	260922	1875
8.38333	441382	441390	375880	384759	361062	297635	265039	1919
8.46667	442876	442277	375564	382503	360188	293880	262284	2009
8.55	434403	439472	379814	381949	358299	295728	261462	1932
8.63333	440376	440103	372400	381908	358272	296238	265521	1968
8.71667	443070	441867	378627	383320	360699	299593	261523	1946
8.8	442219	440122	376431	383156	359450	300225	264024	1953
8.88333	441183	443063	374491	384675	358369	298306	269633	1904
8.96667	437603	442963	376750	382055	362553	301814	269105	1987
9.05	443418	445593	375123	384853	360426	305307	266566	2025
9.13333	442049	438447	383623	384716	361088	298571	263311	1936
9.21667	440958	440966	376695	389457	349255	303483	265313	2068
9.3	437557	443469	377621	384284	365842	299840	268205	1883
9.38333	438815	437846	376804	382399	360362	302308	270443	1958
9.46667	437419	439591	379423	389148	363400	302809	272150	1973
9.55	437984	438260	379912	384753	359352	304120	271548	1987
9.63333	436446	448407	381888	388825	365274	304937	269030	2049
9.71667	439878	439479	384363	384759	357011	305730	264141	1986
9.8	438409	442712	381830	386065	364433	302422	273439	2087
9.88333	436263	438987	376711	382585	365537	307446	267945	2120
9.96667	430947	439610	381700	379512	363384	306471	270795	2062
10.05	439350	440180	373406	385863	360447	311204	272134	1968
10.1333	438245	441330	381322	387019	358690	306708	272784	2000
10.2167	433703	444668	379013	382385	365772	307960	274623	2053
10.3	443661	435606	380424	387270	359402	309035	271873	2138
10.3833	437139	433305	377662	384863	368027	303453	272889	2085
10.4667	439190	439990	377491	379199	363740	302850	274864	2122
10.55	433384	441577	378287	381682	367136	306456	272224	2050
10.6333	439683	441547	382253	383628	360243	304575	275595	2183
10.7167	436850	437263	377455	385494	367938	309845	276434	2092
10.8	436920	440891	383645	380918	364518	305401	274884	2097
10.8833	439854	435055	383545	381293	362265	306971	277498	2141
10.9667	438057	437279	381374	383421	364215	309149	274702	2192
11.05	437477	439631	379990	381918	366292	305566	272324	2207
11.1333	442148	437145	377348	383799	363600	309331	276902	2055
11.2167	436736	431400	382564	379347	365049	306765	274364	2170
11.3	438657	435269	381531	379075	362576	310869	273863	2121
11.3833	433437	434322	380977	386137	361416	308862	272879	2143
11.4667	437933	432245	375704	385803	365034	313093	276258	2256
11.55	437064	431634	375900	383841	365265	313122	280913	2100
11.6333	435792	433956	373758	381025	363407	305764	281693	2226
11.7167	432995	434695	380785	387740	362998	309194	273567	2295
11.8	435163	435258	376960	384257	361283	310298	275978	2171
11.8833	433313	433506	379647	379674	359450	310381	280411	2183
11.9667	430953	431971	376257	381143	361537	310690	278249	2241
12.05	432081	435050	374422	382193	362100	305781	278943	2205
12.1333	436188	426473	379058	387560	366262	310320	277989	2210
12.2167	434766	434429	379958	381317	359305	305340	277312	2284
12.3	433757	427574	373145	381676	361631	306667	276957	2256
12.3833	427061	430187	373879	378629	358641	310242	279264	2319
12.4667	432722	435384	375720	378696	360973	309601	277265	2304
12.55	433112	427082	379357	383524	362495	309938	284186	2245
12.6333	432624	428934	375463	378382	358038	310230	281022	2277
12.7167	433790	432956	374183	383508	361327	308556	278247	2290
12.8	431510	428309	377500	384516	363250	312705	280479	2277
12.8833	432164	436049	374074	381100	359212	309621	278278	2400
12.9667	431631	429095	371174	380635	359634	306812	279853	2320
13.05	430892	428120	373636	384170	358452	313617	279164	2347
13.1333	423857	426555	374886	379840	361830	308512	282000	2304
13.2167	425009	428195	379123	382283	361859	311914	277825	2317
13.3	430798	429730	372738	373573	358995	311494	278112	2271
13.3833	428933	429376	375760	382221	363056	309695	278330	2250
13.4667	419021	427211	376307	379421	354329	309658	281453	2366
13.55	428416	419258	374264	374390	358422	311762	279877	2433
13.6333	423215	427226	379401	377696	358043	307257	277764	2261
13.7167	427112	425373	378001	373530	360417	308075	277395	2266
13.8	426013	429130	374084	375865	359379	307031	282211	2276
13.8833	420242	422584	368595	377417	357990	309645	282575	2377
13.9667	427055	421539	373616	380667	353937	311526	281469	2320
14.05	424121	423430	368315	376440	358436	306189	283840	2270
14.1333	426980	420122	371257	373753	354322	305812	278668	2364
14.2167	423512	423444	371267	375751	355399	308168	279793	2463
14.3	423705	421137	369998	378563	353192	308930	285163	2413
14.3833	420604	420889	366533	374579	355957	308238	278839	2406
14.4667	425145	418890	371708	373292	356275	308913	278197	2358
14.55	418290	421102	365293	372439	359996	309830	275963	2499
14.6333	425704	416426	371133	375420	355260	307857	281069	2467
14.7167	419857	412722	368554	376941	355812	308830	281506	2418
14.8	422490	418202	366357	372802	354423	309982	285077	2413
14.8833	424519	420376	368698	375424	352557	312040	276929	2630
14.9667	427110	419927	361528	370807	351575	309827	277924	2347
15.05	417636	418370	373035	370607	359174	310876	275183	2490
15.1333	419744	417266	363689	374423	351571	308038	280115	2390
15.2167	416135	413826	365723	369898	352135	306526	278719	2497
15.3	422454	418215	364321	370098	356008	310800	276845	2468
15.3833	417584	415087	371557	373917	351660	305343	278903	2410
15.4667	415026	415122	364681	367142	351930	308394	275651	2490
15.55	415397	412871	367920	370054	347562	309827	282174	2521
15.6333	415298	410276	367432	369637	349896	305495	276999	2394
15.7167	412604	416233	367022	368872	355607	310064	278259	2475
15.8	417968	412419	363605	366327	346254	304972	276984	2390
15.8833	418117	407436	361090	366267	347305	306962	282920	2459
15.9667	409095	410117	364279	369418	349905	308292	278564	2468
16.05	411825	413353	361239	369069	351057	307894	277556	2535
16.1333	412937	407727	364500	372894	349002	306994	275747	2532
16.2167	416719	408507	365397	366009	351275	302979	279300	2666
16.3	415495	410798	360602	368843	348284	305827	276803	2439
16.3833	407645	411759	361765	363674	348032	309667	272906	2538
16.4667	411141	410086	359084	360339	348958	306146	275613	2443
16.55	414164	410383	358583	366946	347464	306497	276063	2581
16.6333	408790	404737	361955	365626	349923	305134	278691	2536
16.7167	405254	407497	366804	359645	347581	305835	275854	2549
16.8	407201	403373	358218	363041	347382	308592	276407	2626
16.8833	409403	406995	362830	366738	340955	303480	277098	2418
16.9667	403392	404981	360868	361002	347174	303583	278514	2600
17.05	409155	405768	360775	366901	348589	305539	274294	2571
17.1333	406201	406794	357713	358292	344147	300491	278417	2526
17.2167	407917	405422	354980	363436	339475	304394	278366	2489
17.3	406047	401569	355556	360650	346989	305244	276368	2656
17.3833	406476	400824	356007	360683	345895	300407	275926	2544
17.4667	408512	400310	355983	357128	350079	301465	274979	2563
17.55	406008	400107	354044	365169	342013	306909	274630	2628
17.6333	404425	398912	353738	357910	342249	301350	277007	2654
17.7167	406605	397836	357541	361364	342575	301241	271186	2518
17.8	403372	399710	355851	355619	342559	298520	274131	2586
17.8833	401177	396568	353152	359807	340657	301692	277612	2664
17.9667	404750	397002	355734	352815	342230	298971	277377	2535
18.05	402332	394602	354030	357231	337541	301769	275378	2579
18.1333	401462	394534	353592	356506	341778	307286	272556	2565
18.2167	399962	398564	355245	357773	343758	300999	269658	2628
18.3	403092	395167	355326	355727	336527	301854	274998	2712
18.3833	399462	398091	348187	358671	340073	300853	274093	2610
18.4667	403028	399159	347529	354585	338193	306686	274444	2717
18.55	399982	390152	350885	354601	341668	296015	273814	2628
18.6333	399190	391968	349624	350268	338831	300406	272536	2736
18.7167	399855	393582	351956	358690	340954	302957	273222	2671
18.8	394962	393937	348255	353471	339626	299014	275832	2740
18.8833	399927	392802	348636	352543	342192	299934	272672	2740
18.9667	397862	391392	347097	350698	339698	299181	270051	2714
19.05	401750	396411	345787	352424	337014	300283	273889	2757
19.1333	394314	389363	345846	354206	336729	300421	273203	2685
19.2167	396594	387427	349155	353490	335716	298037	272906	2661
19.3	392264	396717	346343	353303	331517	295624	276473	2662
19.3833	395841	390155	347978	353086	335211	298339	277514	2612
19.4667	387646	392093	351354	350748	330531	297948	271049	2742
19.55	392654	390390	348208	347569	337981	294941	271995	2697
19.6333	390380	382124	347770	345066	337178	298786	272057	2610
19.7167	390043	378982	345809	345924	333476	300943	271319	2651
19.8	392053	383472	346084	348706	335939	295503	265830	2633
19.8833	393937	384232	344345	351356	333965	295566	275150	2723
19.9667	389608	383441	345274	347749	333472	293611	271589	2763
20.05	392093	387444	343292	346484	333048	292466	270060	2730
20.1333	380500	381166	344383	347499	329457	295698	270063	2681
20.2167	391696	378411	341051	342204	335960	291384	273188	2699
20.3	382699	378814	343188	342462	332054	294566	268432	2779
20.3833	381813	382658	343052	343610	330523	291680	270318	2703
20.4667	388815	382017	341274	345348	333845	295166	272008	2693
20.55	387216	384472	336862	343583	328391	298090	270746	2861
20.6333	382856	384510	341536	344675	335334	296324	268707	2754
20.7167	383149	376088	342802	343476	332132	292543	267895	2666
20.8	384526	376531	339286	342462	327666	291955	269569	2785
20.8833	381542	380302	339516	346327	325649	297287	271849	2877
20.9667	385003	375540	337526	338348	330370	294891	268624	2825
21.05	378292	374610	337119	338221	331967	294672	271231	2684
21.1333	380004	377527	336412	339589	331181	289366	268765	2752
21.2167	384345	374199	335040	339692	328119	293371	265211	2735
21.3	379390	378139	337193	342276	328445	290879	269073	2709
21.3833	378934	370694	337918	338162	329945	289291	269063	2875
21.4667	377351	370739	339085	340866	327298	290303	268949	2860
21.55	380234	374453	341870	339075	330817	289540	271456	2823
21.6333	372681	368789	332913	341408	328872	288674	269186	2882
21.7167	373809	372703	330480	339109	326479	292992	265527	2774
21.8	373454	375673	328772	337041	327050	290087	269994	2819
21.8833	376081	371619	336624	336558	328340	290557	271054	2802
21.9667	369884	369618	332548	335947	325767	285337	266442	2820
22.05	374876	367847	331670	336392	324430	291332	266422	2776
22.1333	374445	367284	334937	338087	321258	290809	269142	2894
22.2167	370185	372556	336351	340906	324908	288671	266415	2863
22.3	376563	369720	337353	337471	323817	285810	267010	2947
22.3833	376199	371789	332524	334670	318988	285962	267111	2860
22.4667	373780	369859	336387	332525	321668	285738	265670	2858
22.55	373447	367515	327349	334243	324076	287431	263757	2911
22.6333	368927	371059	329105	333655	318152	286962	265626	2819
22.7167	374010	364882	328407	330600	317869	289751	261410	2901
22.8	371162	367206	328103	331372	318326	287106	263765	2981
22.8833	371107	363759	329671	334373	322915	286270	265831	2823
22.9667	368634	364043	328610	332541	321494	282933	264391	2878
23.05	369166	361160	324390	332494	320872	287382	264610	2834
23.1333	365907	363379	326993	331079	324602	284856	260425	2768
23.2167	368268	362500	326381	328310	321901	282063	260568	2783
23.3	363023	364365	327472	329555	318313	284383	265815	2926
23.3833	361661	358703	331241	331456	318572	285271	262940	2889
23.4667	370879	361576	326161	330697	317682	287947	262585	2849
23.55	365171	360424	328292	330473	317549	283418	262109	3006
23.6333	368783	361727	325155	328608	320221	281410	264044	2856
23.7167	364879	365637	321496	329162	315389	280760	266005	2840
23.8	365534	357627	323542	323174	317671	284295	259915	2852
23.8833	362902	353566	325160	325558	314740	280911	261406	2884
23.9667	367010	359550	320948	328030	313696	279801	256545	2836
24.05	357154	359290	321180	324047	312993	281942	259916	2768
24.1333	361097	355314	325638	321650	317327	281532	260700	3040
24.2167	364164	355955	324388	324906	314744	276748	257900	2955
24.3	360907	352859	322186	323122	312149	276241	258976	2878
24.3833	361106	353730	318938	325034	312659	279825	263100	3000
24.4667	361317	362362	322664	322334	311742	278342	256087	2973
24.55	358288	355363	320907	317888	313305	282002	255177	2851
24.6333	360269	351637	316573	321815	308135	282017	258166	2872
24.7167	354565	347993	314099	322713	312932	276123	261221	2960
24.8	359562	350770	314266	318386	313846	279214	255235	2903
24.8833	356898	351300	319011	317205	318602	280714	255780	2856
24.9667	353075	351128	313031	318881	305771	276480	256187	2893
25.05	353616	348878	316440	319712	310304	276092	258740	3118
25.1333	350444	351206	315799	319466	312339	280907	259323	3033
