# Supplementary material for: Rate-limiting transport of positively charged arginine residues through the Sec-machinery is integral to the mechanism of protein secretion
Source: eLife. 2022 Apr 29;11:e77586. doi: 10.7554/eLife.77586 (PMC9110029; doi:10.7554/eLife.77586)
Supplement: Figure 3—figure supplement 3—source data 1. [file elife-77586-fig3-figsupp3-data1.xlsx]

## Sheet: Sheet1
time from injection (min)	wt	QR	∆h1	wt	EQ	FW	wt	QR	∆h1	wt	EQ	FW	LXX	QK	∆h2	LXX	QE	TV	LXX	QK	∆h2	LXX	QE	TV	-	KR	∆h3	∆φ3	RQ	IT	-	KR	∆h3	∆φ3	RQ	IT	LA	RK	∆φ1	∆φ2	KQ	AL	LA	RK	∆φ1	∆φ2	KQ	AL	AL
-5.48333	8	7	7	10	20	7	13	4	4	10	21	15	4	3	4	5	12	1	5	7	10	9	7	5	17	1	3	7	4	6	21	5	3	8	14	9	13	3	10	1	3	1	2	2	11	3	18	16	12
-4.7	12	3	8	10	36	3	6	2	3	18	37	18	5	7	8	3	7	5	4	3	10	2	13	16	13	3	6	5	2	6	14	7	9	7	21	5	7	2	5	6	1	7	1	5	2	5	18	2	10
-3.91667	6	6	17	6	32	5	13	8	2	12	20	7	3	6	3	6	9	8	7	8	6	8	13	12	13	6	5	5	8	5	14	3	4	13	10	15	5	5	8	5	8	4	7	8	7	2	2	11	6
-3.13333	8	4	8	6	31	5	4	3	9	4	37	23	4	8	5	11	5	5	5	6	2	7	6	10	24	7	5	2	3	4	11	7	6	4	8	10	10	3	2	3	7	4	8	7	3	8	13	8	9
-2.35	5	6	2	12	18	4	4	5	9	15	34	10	7	4	6	6	4	7	2	6	11	5	7	2	4	3	1	8	4	9	20	5	8	6	21	13	8	8	5	2	3	4	7	4	3	6	8	10	5
-1.56667	4	4	5	12	46	3	8	12	3	19	21	7	1	10	12	3	5	4	3	3	4	8	8	12	18	5	2	7	3	6	20	6	2	3	8	16	5	5	1	3	3	1	6	8	7	6	11	6	5
-0.78333	10	7	5	5	33	7	12	9	3	9	29	10	6	5	6	5	15	6	6	12	0	4	11	12	17	7	8	0	4	9	12	6	4	1	16	2	3	1	8	2	5	12	6	5	3	10	12	8	2
0
0.78333	35689	37820	37759	36395	33559	33170	36816	39178	38822	37321	35190	34283	32037	34482	40610	35339	39243	36759	34957	35626	42169	36355	41057	39130	1349	34246	41719	43015	40839	43492	495	36045	43010	43732	42567	46059	43083	38915	40429	41699	39397	35427	44810	40508	41405	42461	41458	37464	34374
1.56667	34622	37602	36927	35226	32290	31607	34870	37903	36989	35774	33482	32953	31552	33198	39529	34264	39086	36011	33816	34356	40494	34311	39718	37980	1204	33331	41589	42551	39957	42362	543	34203	40773	42340	41134	44117	42096	37552	39205	41177	38455	33503	43740	38956	40113	40800	39382	35686	32942
2.35	33636	36888	35582	34739	31196	30749	33586	37005	35234	34023	32037	31812	30711	32377	38384	32655	38493	34833	32841	32970	38891	32281	39092	36092	1229	32141	40168	41896	39072	41055	492	33312	40430	42067	40140	42487	41222	37038	38629	39572	37281	32947	42699	37562	38529	39297	38331	34530	32199
3.13333	32365	36219	34583	33036	30563	29901	32552	36477	33999	32893	30479	30714	29387	31294	37695	31537	37879	33758	31039	31125	37463	31137	38452	35177	1185	30426	39693	41620	38145	40282	500	30893	38829	41039	39263	41290	40312	35875	38017	39104	36294	31589	42089	36232	37640	38027	36831	32584	31265
3.91667	31458	35583	33353	32278	29229	29256	31239	35549	32607	31763	29149	29379	28586	30023	36709	30412	37566	33248	29964	29915	36444	29610	37005	34529	1062	29903	38742	40527	37407	38922	477	29817	38044	39651	37823	40726	39926	35272	36745	37262	35427	30314	40632	35209	36646	37340	35911	31996	30241
4.7	30422	35160	31917	31392	28575	28016	30672	35004	31223	30596	28494	28647	28087	28967	35736	29109	36319	31671	29046	28773	35207	29185	36505	33036	1166	28846	37887	39847	36237	37799	403	28803	37487	39154	36847	39431	38349	34374	36658	36227	34506	29299	39412	34086	35398	35562	34820	30687	28938
5.48333	29550	34205	30953	30294	27391	26826	29112	34185	29911	30003	27401	26788	26499	27937	34836	28441	35805	31319	27293	27399	34283	27911	35790	32275	1098	27832	36802	38476	35634	36650	415	27686	36232	38062	36121	37933	37987	33353	35609	35268	33246	28262	38587	32944	34379	34980	34053	29493	28283
6.26667	28979	33004	30342	29056	26727	26068	28180	33129	29464	28522	26316	26410	25618	26910	33607	27757	34593	30122	26815	26791	33539	26957	34496	31218	1035	26430	35452	37551	34379	35654	438	26689	34701	37160	34561	36997	37240	32296	34014	34813	32222	27950	37151	32025	33437	33576	32895	29025	27581
7.05	27560	31999	29510	28445	25358	25331	27437	32571	27873	27525	25618	26138	24711	26151	32996	26331	34427	29420	25756	25919	32044	26026	34325	30327	1108	25758	34572	36483	33567	34715	463	25937	33917	36331	33323	35982	36084	31461	32909	33677	31440	26725	36500	31324	32496	32577	31492	27784	26969
7.83333	26783	31474	28522	27761	24547	24142	26283	31969	27275	26914	24781	24928	24588	25398	32425	25910	33605	28179	24762	24764	31703	25219	33714	29447	1041	25029	34304	35770	33296	34048	460	24885	32818	34751	33259	35178	35328	30750	32401	32554	30590	25928	35460	30243	31884	31850	30876	27161	26147
8.61667	25969	31249	27429	26836	23768	23364	26042	30876	26456	26149	24160	23904	23240	24777	31232	24952	32931	27843	24326	23986	30222	24076	32361	28301	969	24343	33262	34979	32116	33431	443	23767	32136	33885	32271	34104	34600	29681	31600	31616	29764	25224	34872	29347	30661	30978	30013	25991	25596
9.4	25068	30668	26691	26095	23229	23140	24933	30104	25585	25125	22813	23160	23002	23779	30344	24156	32031	26874	23500	23561	29588	23667	31982	27980	1043	23367	32516	34430	31220	32097	417	23067	31501	33228	31937	33088	33164	28859	30764	30745	28889	24766	34241	28546	30146	29904	29189	25433	24864
10.1833	24176	30015	26111	25323	22610	22504	24437	29539	25149	24849	22611	22572	21726	23095	29538	23290	31417	26547	22064	22706	28855	22514	31009	27205	934	22554	31362	33331	30411	31391	426	22654	30391	32754	30589	32091	32843	28457	29929	30360	28312	24046	33028	27855	29328	29595	28172	24697	24003
[truncated: 47 more columns]
