# Supplementary material for: Rate-limiting transport of positively charged arginine residues through the Sec-machinery is integral to the mechanism of protein secretion
Source: eLife. 2022 Apr 29;11:e77586. doi: 10.7554/eLife.77586 (PMC9110029; doi:10.7554/eLife.77586)
Supplement: Figure 4—source data 1. [file elife-77586-fig4-data1.xlsx]

## Sheet: pull
LYSp	LYSd	ARGp	ARGd	GLU	GLN	TRP	LEU	ALA
624.765	482.006	537.338	475.721	627.359	409.834	538.479	433.869	452.451
593.204	452.585	510.202	508.526	527.042	437.692	449.484	392.644	527.749
590.644	447.033	657.326	447.637	556.692	482.788	428.692	375.353	511.597
615.82	436.581	583.065	575.205	489.535	491.217	436.603	382.133	451.695
533.484	450.665	616.84	525.681	498.259	427.254	413.277	405.783	422.301
500.849	483.801	529.85	374.72	469.125	535.536	382.185	492.074	473.01
470.549	472.192	752.621	515.511	523.049	475.735	433.021	359.672	525.675
644.232	481.773	710.807	451.284	490.385	415.464	432.932	390.395	446.292
470.146	393.119	526.363	547.967	509.385	405.178	383.352	580.083	530.648
541.551	489.026	649.827	606.377	463.246	445.949	376.845	411.37	526.7
664.741	423.125	557.967	394.772	409.482	465.074	462.417	484.879	470.79
576.548	480.612	580.578	448.285	520.101	392.495	393.652	394.997	494.815
633.902	529.712	711.605	589.911	500.347	415.309	464.117	394.111	482.783
616.279	487.73	619.165	468.243	534.808	451.757	480.359	549.845	342.506
482.181	404.201	555.14	555.559	441.39	469.653	388.275	455.549	515.45
595.2	422.863	642.5	495.25	516.329	441.465	458.34	432.349	462.352
491.385	466.785	630.384	472.026	622.044	494.931	482.621	361.084	495.887
644.875	451.326	652.16	503.029	472.034	483.248	496.452	467.073	463.952
682.74	429.982	599.786	578.873	489.777	436.71	436.39	481.893	375.086
553.028	443.273	440.984	616.023	377.122	486.693	562.659	444.331	550.173
470.742	408.412	567.353	404.777	444.644	419.652	459.586	500.795	408.558
651.463	406.496	586.652	624.587	521.674	547.852	468.43	450.007	448.386
604.523	470.568	513.067	579.808	472.153	419.736	417.075	562.553	321.501
532.1	481.52	586.954	539.324	498.722	409.311	384.669	407.685	516.607
