# Supplementary material for: Rate-limiting transport of positively charged arginine residues through the Sec-machinery is integral to the mechanism of protein secretion
Source: eLife. 2022 Apr 29;11:e77586. doi: 10.7554/eLife.77586 (PMC9110029; doi:10.7554/eLife.77586)
Supplement: Figure 4—source data 2. [file elife-77586-fig4-data2.xlsx]

## Sheet: Sheet1
Protonated			Deprotonated
x	y	stddev	x	y	stddev
-3.2099	1.90738	0.0311423	-3.23589	4.05056	0.0521091
-3.17535	1.94277	0.0696432	-3.20117	4.25091	0.100011
-3.14081	1.85084	0.0764547	-3.16645	4.18944	0.0623504
-3.10627	1.85926	0.232231	-3.13173	4.04327	0.156691
-3.07173	1.85346	0.275335	-3.09701	4.03091	0.313025
-3.03718	1.63269	0.228133	-3.06229	4.00658	0.332193
-3.00264	1.69233	0.279842	-3.02758	3.83354	0.276536
-2.9681	1.79112	0.296644	-2.99286	3.84059	0.288421
-2.93356	1.73606	0.240283	-2.95814	3.78226	0.299198
-2.89901	1.83209	0.27163	-2.92342	3.68452	0.282014
-2.86447	1.90415	0.297829	-2.8887	3.73036	0.358529
-2.82993	1.78666	0.247641	-2.85398	3.68605	0.355054
-2.79539	1.83343	0.351065	-2.81927	3.56689	0.301964
-2.76085	1.88859	0.368572	-2.78455	3.64332	0.354076
-2.7263	1.87626	0.272295	-2.74983	3.64333	0.3258
-2.69176	1.94444	0.293614	-2.71511	3.6585	0.296695
-2.65722	1.95953	0.315606	-2.68039	3.82814	0.371414
-2.62268	1.84495	0.25218	-2.64567	3.82949	0.352651
-2.58813	2.01412	0.338239	-2.61096	3.7416	0.30227
-2.55359	2.20965	0.32685	-2.57624	3.88282	0.362132
-2.51905	2.28531	0.265818	-2.54152	3.90684	0.31358
-2.48451	2.33032	0.295954	-2.5068	3.89779	0.294659
-2.44996	2.30778	0.254444	-2.47208	3.83931	0.337527
-2.41542	2.50366	0.30707	-2.43736	3.74422	0.300246
-2.38088	2.70918	0.348286	-2.40265	3.79235	0.345599
-2.34634	2.72592	0.282689	-2.36793	3.66965	0.343202
-2.3118	2.82083	0.319607	-2.33321	3.49758	0.307312
-2.27725	2.8589	0.356332	-2.29849	3.54869	0.38684
-2.24271	2.81739	0.276911	-2.26377	3.51459	0.358275
-2.20817	2.914	0.284994	-2.22905	3.47516	0.349769
-2.17362	2.96778	0.286612	-2.19434	3.58365	0.430071
-2.13908	2.92888	0.260746	-2.15962	3.63448	0.35382
-2.10454	2.94199	0.286091	-2.1249	3.71208	0.331899
-2.07	2.82693	0.283885	-2.09018	3.68038	0.385296
-2.03546	2.8308	0.302503	-2.05546	3.39121	0.334903
-2.00091	3.11246	0.370221	-2.02074	3.12868	0.37491
-1.96637	3.22924	0.353602	-1.98603	2.97524	0.436634
-1.93183	3.36072	0.286101	-1.95131	2.74723	0.343777
-1.89729	3.50948	0.296003	-1.91659	2.97367	0.51387
-1.86274	3.5003	0.30102	-1.88187	3.37947	0.54966
-1.8282	3.79754	0.491068	-1.84715	3.56299	0.468488
-1.79366	4.32277	0.600783	-1.81244	3.85713	0.455365
-1.75912	4.66738	0.483318	-1.77772	4.01195	0.465252
-1.72457	5.11869	0.467209	-1.743	3.92859	0.439526
-1.69003	5.42975	0.496797	-1.70828	3.75281	0.497735
-1.65549	5.29745	0.445842	-1.67356	3.28633	0.502371
-1.62095	5.44018	0.464225	-1.63884	2.5015	0.45956
-1.58641	5.70557	0.475318	-1.60413	1.85226	0.516298
-1.55186	5.89318	0.425788	-1.56941	1.40969	0.522737
-1.51732	6.17808	0.439343	-1.53469	1.11722	0.472097
-1.48278	6.1886	0.471125	-1.49997	1.13372	0.524273
-1.44824	5.72197	0.433281	-1.46525	0.969956	0.513746
-1.41369	5.38575	0.45631	-1.43053	0.581299	0.471944
-1.37915	5.32269	0.518214	-1.39582	0.236307	0.471384
-1.34461	5.09908	0.477726	-1.3611	-0.0374846	0.472354
-1.31007	4.85781	0.473024	-1.32638	-0.268393	0.468811
-1.27552	4.76638	0.49554	-1.29166	-0.306604	0.459284
-1.24098	4.70417	0.442314	-1.25694	-0.263241	0.461163
-1.20644	4.82804	0.509428	-1.22222	-0.33689	0.458975
-1.1719	4.81788	0.495858	-1.18751	-0.617231	0.458244
-1.13735	5.06609	0.470192	-1.15279	-0.693448	0.528287
-1.10281	5.76167	0.52432	-1.11807	-0.172623	0.61498
-1.06827	6.53457	0.482503	-1.08335	0.467327	0.616059
-1.03373	7.37906	0.459632	-1.04863	0.991562	0.573928
-0.999185	8.11069	0.466152	-1.01391	1.60152	0.60312
-0.964642	8.58129	0.46947	-0.979195	2.00369	0.596305
-0.9301	8.96675	0.475833	-0.944477	2.16499	0.57009
-0.895558	9.40567	0.517499	-0.909759	2.46473	0.621442
-0.861015	9.81014	0.486824	-0.87504	2.81649	0.647316
-0.826473	10.2945	0.529092	-0.840322	3.22348	0.574129
-0.791931	10.8825	0.562773	-0.805604	3.89703	0.593059
-0.757388	11.4643	0.519856	-0.770886	4.55679	0.569856
-0.722846	12.3397	0.555119	-0.736167	5.44226	0.612588
-0.688303	13.3517	0.572762	-0.701449	6.64337	0.651429
-0.653761	14.3057	0.526729	-0.666731	7.64712	0.619431
-0.619219	15.2641	0.519798	-0.632012	8.42935	0.593101
-0.584676	15.9216	0.520821	-0.597294	8.94777	0.600843
-0.550134	16.211	0.520967	-0.562576	9.13871	0.591464
-0.515592	16.314	0.521612	-0.527857	9.15807	0.577233
-0.481049	16.1286	0.531328	-0.493139	8.94155	0.578674
-0.446507	16.0711	0.591302	-0.458421	8.38307	0.583171
-0.411965	16.5914	0.766437	-0.423702	7.91758	0.619473
-0.377422	16.8695	0.762081	-0.388984	7.76076	0.644186
-0.34288	16.5927	0.697116	-0.354266	7.6306	0.632649
-0.308337	16.2085	0.655568	-0.319548	7.50042	0.618519
-0.273795	15.8025	0.659238	-0.284829	7.17864	0.619958
-0.239253	15.1374	0.658185	-0.250111	6.36707	0.635988
-0.20471	14.4842	0.656522	-0.215393	5.35017	0.634271
-0.170168	13.9263	0.675187	-0.180674	4.7838	0.708619
-0.135626	13.2765	0.652789	-0.145956	4.31474	0.705712
-0.101083	12.8562	0.693808	-0.111238	3.79548	0.671728
-0.0665409	12.613	0.746585	-0.0765195	3.39703	0.676342
-0.0319985	12.0441	0.691237	-0.0418012	2.93885	0.677471
0.00254383	11.5594	0.707365	-0.00708293	2.44096	0.671335
0.0370862	11.1982	0.741487	0.0276354	2.03781	0.684007
0.0716286	10.8114	0.695258	0.0623537	1.7165	0.672134
0.106171	10.3929	0.695074	0.097072	1.45898	0.674781
0.140713	9.79521	0.703014	0.13179	1.09229	0.677417
0.175256	9.26239	0.706312	0.166509	0.441463	0.67647
0.209798	9.12209	0.761987	0.201227	-0.610902	0.688858
0.24434	8.80482	0.745016	0.235945	-1.88887	0.698111
0.278883	8.40311	0.718964	0.270664	-2.92652	0.705318
0.313425	8.30039	0.750055	0.305382	-3.2853	0.804828
0.347967	8.20902	0.734474	0.3401	-3.4457	0.800172
0.38251	8.21346	0.712708	0.374818	-3.75589	0.771131
0.417052	8.31277	0.720847	0.409537	-3.98674	0.814984
0.451595	8.28182	0.710449	0.444255	-4.28608	0.810693
0.486137	8.10801	0.711072	0.478973	-4.78616	0.77433
0.520679	7.9361	0.720134	0.513692	-5.24162	0.762512
0.555222	7.942	0.7297	0.54841	-5.80136	0.762959
0.589764	8.03835	0.852998	0.583128	-6.15003	0.833561
0.624306	8.10704	0.894536	0.617846	-6.10094	0.887753
0.658849	7.81326	0.914564	0.652565	-6.05274	0.855099
0.693391	7.05615	0.933901	0.687283	-6.00652	0.824954
0.727934	6.4384	0.916493	0.722001	-6.16193	0.82149
0.762476	6.16605	0.918146	0.75672	-6.56173	0.839745
0.797018	6.07411	0.918253	0.791438	-6.63265	0.895877
0.831561	5.83628	0.914575	0.826156	-6.43277	0.907554
0.866103	5.31862	0.918731	0.860875	-6.39014	0.894823
0.900645	4.72717	0.942003	0.895593	-6.39442	0.884905
0.935188	4.13686	0.966721	0.930311	-6.45621	0.883064
0.96973	3.32796	0.94766	0.965029	-6.67309	0.875574
1.00427	2.48721	0.958877	0.999748	-6.67493	0.930213
1.03882	1.80856	0.970578	1.03447	-6.65597	0.915613
1.07336	1.26694	0.951619	1.06918	-6.74017	0.905334
1.1079	1.01713	0.976837	1.1039	-6.56869	0.988255
1.14244	0.799836	0.973074	1.13862	-6.38438	0.989579
1.17698	0.663887	0.949288	1.17334	-6.56837	0.970848
1.21153	0.648216	0.966029	1.20806	-6.88211	0.968776
1.24607	0.463881	0.95721	1.24278	-7.38189	0.971413
1.28061	0.395194	0.978608	1.27749	-7.92161	0.970874
1.31515	0.508714	1.00687	1.31221	-8.20705	0.987234
1.3497	0.497794	0.984673	1.34693	-8.34801	0.986363
1.38424	0.608675	0.957001	1.38165	-8.26185	1.01442
1.41878	0.960467	0.962843	1.41637	-7.83807	1.05507
1.45332	1.31082	0.957288	1.45109	-7.4842	1.03481
1.48787	1.46403	0.958008	1.4858	-7.14849	1.00274
1.52241	1.11353	0.96084	1.52052	-6.85147	1.0052
1.55695	0.586312	1.00221	1.55524	-6.74929	1.00619
1.59149	0.611534	1.15476	1.58996	-6.57879	1.00909
1.62603	0.906226	1.2121	1.62468	-6.70662	1.01673
1.66058	1.04665	1.16971	1.6594	-6.89162	1.03301
1.69512	1.00247	1.14994	1.69411	-6.83896	1.08001
1.72966	0.758723	1.15795	1.72883	-6.70176	1.09595
1.76421	0.379459	1.17799	1.76355	-6.71654	1.05248
1.79875	0.390265	1.20506	1.79827	-6.59318	1.03413
1.83329	0.461306	1.19952	1.83299	-6.54372	1.02834
1.86783	0.375358	1.17765	1.8677	-6.60215	1.02877
1.90237	0.301113	1.17842	1.90242	-6.29467	1.06146
1.93692	0.160967	1.17891	1.93714	-6.01694	1.05756
1.97146	-0.0667494	1.17707	1.97186	-5.93334	1.04793
2.006	-0.0731318	1.22471	2.00658	-5.95723	1.03859
2.04054	-0.00494875	1.24891	2.0413	-6.15652	1.04167
2.07509	0.0220868	1.20751	2.07601	-6.37117	1.05804
2.10963	0.27348	1.2045	2.11073	-6.21797	1.09838
2.14417	0.338779	1.20805	2.14545	-6.1503	1.08265
2.17871	0.261569	1.19801	2.18017	-6.07638	1.07713
2.21326	0.266929	1.21169	2.21489	-5.79099	1.1097
2.2478	0.169893	1.21365	2.24961	-5.60617	1.0936
2.28234	0.0348256	1.20494	2.28432	-5.26265	1.07096
2.31688	0.0971468	1.24094	2.31904	-4.69549	1.10442
2.35142	0.0586612	1.24007	2.35376	-4.35851	1.09081
2.38597	-0.106205	1.2053	2.38848	-4.20369	1.07861
2.42051	-0.117406	1.2029	2.4232	-3.90224	1.09656
2.45505	-0.16502	1.20967	2.45792	-3.74056	1.08392
2.48959	-0.184242	1.24334	2.49263	-3.6085	1.08926
2.52414	-0.182769	1.26633	2.52735	-3.57723	1.10173
2.55868	-0.265645	1.23986	2.56207	-3.61492	1.08229
2.59322	-0.279283	1.236	2.59679	-3.45529	1.10379
2.62776	-0.406475	1.23468	2.63151	-3.33639	1.10535
2.66231	-0.59013	1.22117	2.66623	-3.19634	1.06469
2.69685	-0.483771	1.23977	2.70094	-2.80804	1.05862
2.73139	-0.336657	1.23574	2.73566	-2.44011	1.05802
2.76593	-0.330201	1.22504	2.77038	-1.99298	1.07311
2.80048	-0.187825	1.23503	2.8051	-1.37394	1.11902
2.83502	-0.177278	1.24842	2.83982	-0.883119	1.11081
2.86956	-0.250376	1.23215	2.87454	-0.478925	1.0911
2.9041	0.0077987	1.25043	2.90925	-0.079201	1.09197
2.93865	0.14102	1.25833	2.94397	0.0684363	1.09888
2.97319	0.118252	1.23923	2.97869	0.0853279	1.09867
3.00773	0.242199	1.24563	3.01341	0.275751	1.09809
3.04227	0.2942	1.24367	3.04813	0.320991	1.09974
3.07681	0.373442	1.23931	3.08285	0.3637	1.10042
3.11136	0.496982	1.23713	3.11756	0.610174	1.1145
3.1459	0.587084	1.22854	3.15228	0.79944	1.09895
3.18044	0.697893	1.24623	3.187	0.957132	1.09367
3.21498	0.951557	1.26889	3.22172	1.06546	1.10653
3.24953	1.13438	1.26337	3.25644	1.05176	1.07579
3.28407	1.20521	1.24371	3.29116	1.2157	1.10511
3.31861	1.34379	1.24067	3.32587	1.44028	1.11749
3.35315	1.66359	1.2321	3.36059	1.40453	1.1031
3.3877	1.83477	1.24786	3.39531	1.51785	1.09929
			3.43003	1.67724	1.11067
			3.46475	1.53885	1.1057
