# Supplementary material for: Rate-limiting transport of positively charged arginine residues through the Sec-machinery is integral to the mechanism of protein secretion
Source: eLife. 2022 Apr 29;11:e77586. doi: 10.7554/eLife.77586 (PMC9110029; doi:10.7554/eLife.77586)
Supplement: Figure 5—source data 1. [file elife-77586-fig5-data1.xlsx]

## Sheet: Sheet1
E. coli Sec				E. coli Tat				E. coli unsecreted				S. meliloti Sec				S. meliloti Tat				S. meliloti unsecreted				B halodurans Sec				B halodurans unsecreted				B subtilis Sec				B subtilis unsecreted
bin	number	frequency		bin	number	frequency		bin	number	frequency		bin	number	frequency		bin	number	frequency		bin	number	frequency		bin	number	frequency		bin	number	frequency		bin	number	frequency		bin	number	frequency
0.05	8	0.01643		0.20594	1	0.03704		0.03846	40	0.01005		0.05	28	0.05821		0.0625	5	0.03846		0.03846	162	0.02871		5.55556	4	0.01646		5.55556	0	0		0.05556	1	0.00340136		0.05	0	0
0.15	1	0.00205339		0.2935	1	0.03704		0.11538	75	0.01885		0.15	21	0.04366		0.1875	21	0.16154		0.11538	531	0.0941		16.6667	6	0.02469		16.6667	0	0		0.16667	0	0		0.15	0	0
0.25	25	0.05133		0.38105	5	0.18519		0.19231	196	0.04926		0.25	55	0.11435		0.3125	27	0.20769		0.19231	1081	0.19156		27.7778	18	0.07407		27.7778	6	0.01948		0.27778	2	0.00680272		0.25	1	0.00190476
0.35	60	0.1232		0.46861	8	0.2963		0.26923	469	0.11787		0.35	66	0.13721		0.4375	19	0.14615		0.26923	1271	0.22523		38.8889	54	0.22222		38.8889	35	0.11364		0.38889	2	0.00680272		0.35	5	0.00952381
0.45	93	0.19097		0.55617	9	0.33333		0.34615	704	0.17693		0.45	56	0.11642		0.5625	29	0.22308		0.34615	1115	0.19759		50	66	0.2716		50	106	0.34416		0.5	24	0.08163		0.45	56	0.10667
0.55	99	0.20329		0.64372	3	0.11111		0.42308	824	0.20709		0.55	65	0.13514		0.6875	24	0.18462		0.42308	708	0.12547		61.1111	50	0.20576		61.1111	111	0.36039		0.61111	38	0.12925		0.55	174	0.33143
0.65	84	0.17248						0.5	670	0.16838		0.65	68	0.14137		0.8125	5	0.03846		0.5	409	0.07248		72.2222	26	0.107		72.2222	39	0.12662		0.72222	71	0.2415		0.65	167	0.3181
0.75	62	0.12731						0.57692	466	0.11711		0.75	75	0.15593		0.9375	0	0		0.57692	189	0.03349		83.3333	14	0.05761		83.3333	8	0.02597		0.83333	107	0.36395		0.75	89	0.16952
0.85	41	0.08419						0.65385	278	0.06987		0.85	41	0.08524						0.65385	99	0.01754		94.4444	5	0.02058		94.4444	3	0.00974026		0.94444	49	0.16667		0.85	26	0.04952
0.95	14	0.02875						0.73077	130	0.03267		0.95	6	0.01247						0.73077	43	0.00762006														0.95	7	0.01333
								0.80769	66	0.01659										0.80769	20	0.00354421
								0.88462	22	0.00552903										0.88462	6	0.00106326
								0.96154	39	0.00980146										0.96154	9	0.0015949
