# Supplementary material for: Rate-limiting transport of positively charged arginine residues through the Sec-machinery is integral to the mechanism of protein secretion
Source: eLife. 2022 Apr 29;11:e77586. doi: 10.7554/eLife.77586 (PMC9110029; doi:10.7554/eLife.77586)
Supplement: Figure 6—figure supplement 2—source data 1. [file elife-77586-fig6-figsupp2-data1.xlsx]

## Sheet: Sheet1
	DMSO	DMSO	DMSO	DMSO	nigericin	nigericin	nigericin	nigericin	DMSO	DMSO	DMSO	DMSO	valinomycin	valinomycin	valinomycin	valinomycin	DMSO	DMSO	DMSO	DMSO	val+nig	val+nig	val+nig	val+nig	DMSO	DMSO	DMSO	DMSO	val+nig	val+nig	val+nig	val+nig	DMSO	DMSO	DMSO	DMSO	valinomycin	valinomycin	valinomycin	valinomycin	DMSO	DMSO	DMSO	DMSO	nigericin	nigericin	nigericin	nigericin	DMSO
	pH 7	pH 7	pH 7	pH 7	pH 7	pH 7	pH 7	pH 7	pH 7	pH 7	pH 7	pH 7	pH 7	pH 7	pH 7	pH 7	pH 7	pH 7	pH 7	pH 7	pH 7	pH 7	pH 7	pH 7	pH 8	pH 8	pH 8	pH 8	pH 8	pH 8	pH 8	pH 8	pH 8	pH 8	pH 8	pH 8	pH 8	pH 8	pH 8	pH 8	pH 8	pH 8	pH 8	pH 8	pH 8	pH 8	pH 8	pH 8	pH 6
time from injection (min)	LDDD	DLDD	DDLD	DDDL	LDDD	DLDD	DDLD	DDDL	LDDD	DLDD	DDLD	DDDL	LDDD	DLDD	DDLD	DDDL	LDDD	DLDD	DDLD	DDDL	LDDD	DLDD	DDLD	DDDL	LDDD	DLDD	DDLD	DDDL	LDDD	DLDD	DDLD	DDDL	LDDD	DLDD	DDLD	DDDL	LDDD	DLDD	DDLD	DDDL	LDDD	DLDD	DDLD	DDDL	LDDD	DLDD	DDLD	DDDL	LDDD
-8.1	2444	2836	3633	3777	2212	2557	3157	2549	23407	25117	28006	28384	20578	21030	26059	22079	21592	20695	29320	23994	21026	12153	18956	17340	65529	56406	67222	60970	60377	54766	66517	49631	62518	61193	72451	62876	56705	52328	63751	44921	31047	30289	37958	32153	29142	26899	35351	27053	9455
-8.01667	2657	2983	4019	4018	2353	2831	3455	2894	23892	25543	28979	29370	21594	21888	27228	23115	22143	21280	29463	25341	21826	13731	20775	19080	66723	58978	69528	62764	62353	57373	69116	52633	63729	62432	73271	65125	58461	54585	65222	47160	31755	30514	38520	33124	30734	28354	37069	28059	9554
-7.93333	2868	3167	4247	4281	2490	2942	3684	3279	24869	26513	30096	30036	21952	22779	28069	24119	22987	22513	30989	26320	23036	15036	21874	20281	68503	60542	71715	63739	64149	58186	71095	54681	64999	64187	75177	66765	60108	55531	67551	49553	32594	31533	39634	34085	31017	29709	37466	29728	10238
-7.85	3038	3257	4365	4622	2798	3229	3960	3391	25717	27566	30917	30988	22925	23590	28226	24860	24235	22933	32137	27296	24050	16329	23054	21644	69034	61676	73847	65320	64610	60593	71602	56135	65738	64485	75384	67887	61392	57198	68784	50863	33084	32421	40324	34695	31892	30103	38644	30611	10842
-7.76667	3147	3542	4732	4654	3139	3340	4299	3599	26319	28342	31619	31543	23694	24158	28987	26005	24810	23760	32970	28022	24555	17606	24043	22978	70229	63479	74217	66853	66383	61626	73091	57937	66663	65028	76612	68210	62424	58863	69822	52723	33552	32893	40355	35211	32821	30790	39342	31394	11067
-7.68333	3394	3614	4596	4837	3386	3324	4537	3843	27015	28392	32291	32009	24122	24845	29708	26451	25434	24162	33894	28686	25669	18141	25376	23963	70652	64356	76285	67704	67614	62491	74282	59120	68084	67043	76799	68800	63960	59793	71063	53354	34127	33771	41433	36014	32965	31738	40062	32074	11603
-7.6	3527	3804	4987	5051	3386	3634	4812	3982	27855	28793	32307	32611	24977	25874	30472	26979	26511	25429	34277	29773	26550	18997	26178	24934	71576	65171	77057	68687	68263	64253	76446	59881	69150	67483	78395	69939	64116	60668	72276	54257	35006	33910	41579	37022	33736	32336	40871	32620	11904
-7.51667	3546	4094	5114	5332	3839	3817	4969	4254	28598	29956	33317	32801	26008	26061	30909	27043	26247	26378	35200	30997	26984	20244	26965	25756	72756	66183	78028	69837	69274	64637	76709	61737	68639	67943	78151	71054	65539	60779	72218	55897	35083	34271	42434	37101	34488	32876	41011	33540	12233
-7.43333	3939	4300	5411	5411	3904	3920	4985	4380	28968	29777	34031	33508	26613	26427	31066	28529	27374	26676	35801	31550	27841	20642	27608	26255	73358	66763	77845	71054	69892	65431	77360	62603	70294	68958	78610	71548	66136	62870	73359	56669	35894	35613	42047	37872	35123	33468	41345	33962	12837
-7.35	4104	4373	5534	5465	4246	4399	5439	4536	29562	30902	33678	33719	26917	27108	31893	28711	27782	27011	35798	32148	28032	21738	28135	27449	73865	67676	79677	71245	71161	65965	77731	63242	70413	69183	79664	72185	66589	63265	73500	58073	35619	35532	42801	37977	34856	34203	42044	34356	12929
-7.26667	4073	4358	5862	5846	4178	4458	5456	4731	30215	30931	34464	34244	27312	27296	32400	29492	28200	27912	36923	32598	28794	22419	28931	28267	74407	67888	80374	71531	71388	66834	78830	63783	71825	69775	80370	72360	67208	63742	73925	58381	36648	36056	42886	38342	35839	34625	42826	34870	13147
-7.18333	4231	4526	5693	5884	4556	4541	5813	4814	30271	31657	34861	35182	27894	28181	33329	29691	28775	28043	37661	33402	28740	23050	29478	28614	74466	69029	80209	71853	72521	67077	80014	64325	72733	70572	80492	72625	67673	65095	74591	59182	37506	36275	43331	38331	35901	35298	42920	35727	13578
-7.1	4398	4697	6031	5904	4529	4548	5944	4905	30793	32130	35635	35201	28705	28020	33206	30147	29330	28798	37770	33902	30011	23485	30353	29265	75539	69901	81001	72426	72134	67903	79961	65438	72810	71050	80594	74712	68124	65112	75200	60145	36972	37168	43498	39476	36246	35561	43292	35783	13804
-7.01667	4598	5017	6194	6126	4702	4767	5963	5129	31779	32074	35888	35241	28944	29183	33955	30662	29759	29540	37885	34137	30056	24472	30773	29408	75192	70435	81620	73800	73300	67989	81033	66511	73082	71538	80530	74011	68716	65399	75890	59993	37394	36757	44131	39014	36442	36130	44269	35912	14007
-6.93333	4595	4944	6381	6116	4805	4936	6054	5337	31622	32337	35862	36295	29567	29376	34033	30376	30121	30093	38303	34675	30892	24850	31648	30073	76089	70384	81246	73479	73801	68737	80462	66530	73691	72321	80853	74460	69043	65958	76577	60942	37792	38064	44742	39869	36811	36797	43940	36894	14545
-6.85	4780	5035	6358	6447	5052	5020	6162	5654	32127	32985	36791	36052	30034	29646	34653	31452	31221	29912	38862	35250	31198	25665	31449	30833	76764	70737	82013	74571	74164	69479	81261	66932	74012	72275	81092	74444	69415	66671	77985	60498	37919	37846	44723	40413	37540	36954	44667	36748	14765
-6.76667	4819	5204	6699	6518	5252	5131	6647	5496	32742	33332	36408	36012	30198	29710	34315	31708	31444	30825	39084	35929	31890	26164	32482	31620	76283	71249	82775	73943	74669	70019	80958	67556	74913	73383	81133	75438	69599	67299	76937	62016	38703	37667	44854	39920	37613	36421	44281	36962	15396
-6.68333	4982	5360	6781	6553	5335	5213	6590	5800	33229	33323	37509	37294	30576	30514	34706	31996	31564	31549	39489	36554	32146	26605	32799	32143	77474	72423	82523	75336	74656	70161	81693	68080	75088	72680	82551	75853	70202	67412	76852	61976	38579	38345	45232	40548	38214	37559	44500	37682	15069
-6.6	5132	5436	6822	6877	5486	5281	6718	5753	33704	34170	37809	37229	30601	30547	35143	32342	31770	31510	39501	36825	32641	26818	32587	32692	77357	72069	83442	75028	75235	70979	82216	68805	75547	73331	81458	76056	71015	67445	77968	62784	38961	38892	45523	40743	37829	37619	44827	37760	15530
-6.51667	5279	5568	7029	6885	5509	5487	6883	5865	33702	34477	37882	37366	30720	30714	35428	32608	32121	31930	40449	36536	32763	27542	33515	32361	78361	72627	83293	76088	75635	70487	82287	69489	75540	73967	82197	76753	70544	68169	77862	62806	39171	39045	45247	40604	38620	37807	45691	37922	15793
-6.43333	5372	5910	7087	6754	5844	5592	6802	6206	33929	35069	38214	37045	31331	31001	36024	32612	32398	32025	40480	37012	33138	28057	33858	33299	78677	73225	83887	75681	76184	70901	82792	68864	76456	73526	82142	76338	71381	68112	78044	63798	39002	38878	45778	41243	38278	38350	45793	38540	16141
-6.35	5459	5822	7153	7472	5706	5789	7023	6163	34313	35201	38512	37746	31287	31680	36035	33696	32957	32726	40226	37923	33267	28653	34096	33773	79232	73924	84363	75726	76844	71564	82912	69656	76581	74056	82402	76984	70993	68848	78698	63609	39400	39367	46532	41043	38624	38080	45920	38586	16336
-6.26667	5589	6021	7080	7219	5859	5797	7249	6488	34584	34888	38413	38171	31757	31603	36090	33443	33340	33281	40359	37542	34032	28873	34932	33755	78253	73346	84429	75908	76336	71875	82467	69731	76811	74451	82820	77231	72225	68633	78816	64723	39949	39145	46139	41410	38475	38758	46720	38732	16297
-6.18333	5741	6061	7572	7328	6155	5773	7538	6513	35452	35688	38635	38293	31822	32425	36339	33655	33496	33597	41323	38391	34241	29122	34965	34459	79487	74077	84196	76245	76155	71626	82831	70254	77358	75083	82822	77033	72244	69355	79109	64442	40152	39600	46392	41928	38888	38764	46805	39198	16891
-6.1	5588	6119	7379	7500	6064	6296	7470	6504	35629	35304	38999	38645	32111	31829	36541	34296	33739	33656	41468	38877	33999	29242	35346	34942	79598	74597	84738	77255	77246	71937	83432	70415	77400	75246	83475	76881	72974	69351	79531	65303	40200	39932	46423	41810	38721	38937	46766	39266	17153
-6.01667	5765	6136	7787	7635	6377	5952	7684	6691	35528	35771	39549	38524	32489	32647	37052	34387	34198	34244	41890	38808	34343	30296	34944	35150	79753	74020	84737	77111	75928	72765	83722	69978	77111	75116	83656	77599	72710	70356	79140	65355	39601	40663	46116	41508	39345	38840	47198	39445	17436
-5.93333	5777	6385	7637	7753	6320	6187	7894	6704	35536	36061	39706	38594	33067	32140	37653	34544	34909	34509	41809	39376	34750	30453	35933	35508	79228	74716	85062	77074	77500	72451	84176	70710	77518	75111	83262	77459	72846	70757	78950	65575	40614	40563	47136	41526	39812	39600	46342	39554	17510
-5.85	5978	6361	7647	7729	6294	6275	7971	7056	36145	36015	39073	39372	33512	32981	37420	34844	34679	34357	42444	39072	35182	30623	36205	35861	79907	75211	85245	77512	77721	72944	84600	71796	77975	75788	84256	78147	73188	70751	79489	66578	40659	40033	46827	42280	40258	39775	47099	39633	17816
-5.76667	6140	6586	8055	7918	6485	6276	7776	7112	36534	36502	39851	39019	33520	32847	37314	34901	35323	34920	42394	39354	35869	31200	36295	35795	79707	75474	85728	76921	76844	72700	83833	71355	78419	76351	83973	78247	73697	70773	80312	66126	40899	40453	47246	42130	39980	39884	46552	39708	17971
-5.68333	6362	6393	7843	7988	6796	6406	7944	7014	37037	36392	40152	39155	33719	33291	37348	35160	35437	34643	42810	40107	35298	31525	37140	36444	80476	75463	85263	77480	78087	73420	84275	72520	78318	75849	83970	78983	73223	71308	80031	66696	41035	41670	47218	42438	40388	39868	47207	39745	17986
-5.6	6462	6543	8280	8114	6942	6452	8141	7109	36797	37466	40587	39821	33862	33491	37758	35514	35488	34996	43168	40042	35633	31754	36905	36840	80413	76304	85741	77547	77256	72700	84487	71919	78890	76477	83907	78217	74013	71507	80569	66282	41445	41150	47536	42535	40272	39979	47264	40175	18057
-5.51667	6428	6550	7871	8383	6874	6612	8027	7556	37420	36826	40010	39212	34204	33878	38366	35841	35963	35630	43194	40415	36181	31932	36957	36996	80670	75871	85500	77572	78268	74025	85239	72554	79007	76541	83789	78722	73861	71709	80840	66100	41653	41363	47421	43042	40454	40268	47431	40027	18386
-5.43333	6586	6907	8113	8082	6741	6840	8348	7351	37643	37327	40407	39681	34009	33398	38130	35942	36272	36003	43730	40744	35589	32636	36957	37105	80651	76401	85143	77461	78592	73480	84121	71771	79874	76594	83684	79210	74487	72009	80360	67135	41872	41202	47616	42336	40422	40349	47285	39969	18638
-5.35	6798	6852	8360	8407	7078	6923	8495	7597	37485	37588	40539	39392	34273	33861	39021	36136	36590	36045	44034	41015	36292	33149	38437	37818	81426	76396	85639	78318	78179	74798	85143	72480	79739	76493	83924	78557	74389	71727	80390	67433	41163	41259	47223	42987	40732	40284	47894	40434	19191
-5.26667	6515	7026	8340	8526	7254	6955	8596	7488	38006	37233	41187	39682	34576	34343	38821	36362	36671	36435	43979	40890	37003	33359	38442	37811	81229	76219	86161	77899	78830	73478	85030	71644	80108	76928	84181	78783	74034	72634	80994	67106	41998	41474	47098	43001	40886	40243	47136	41077	19303
-5.18333	7057	7205	8679	8391	7256	6880	8434	7612	38114	38418	40900	40380	34729	34142	39330	36980	36833	36576	43705	41326	36804	33616	38608	38408	81358	76060	85912	77373	78490	74251	84882	73100	79497	77419	84540	79307	74520	71734	81346	68082	41934	41530	47383	43608	41187	40934	47484	40846	19390
-5.1	6991	7227	8678	8455	7228	7029	8912	7767	38500	38640	41354	40765	34926	34445	38749	36511	37148	36818	43922	41758	37169	33683	38362	38102	80854	76701	85577	78045	78702	73596	84749	73682	80341	77239	84183	79252	74343	71864	81433	68007	41889	42070	48035	43693	40735	40671	47441	41224	19644
-5.01667	7090	7088	8542	8730	7538	7083	9006	7838	38533	37972	40978	40908	34859	34232	38804	37182	37502	36930	44245	41942	37266	33774	38736	38663	81583	76687	85940	77864	79430	73597	84357	72511	80725	77377	84906	79707	74095	72597	81258	68063	41912	41931	47585	43586	40844	40920	48359	41152	19635
-4.93333	7105	7405	8822	8938	7531	7241	8969	7855	38874	38208	42033	40643	35299	34903	39064	36900	37660	37462	44408	42267	37516	34088	38892	38863	81742	76228	85498	78038	79453	74775	84812	73324	80640	77640	83528	79241	75539	71956	81358	68767	42246	41773	47760	43363	41454	40944	47431	41071	19736
-4.85	7451	7565	8941	8756	7532	7259	8927	7865	39484	38572	41233	40877	35804	34887	39650	37270	38026	37990	44544	42267	36901	33958	39113	38544	81264	76900	86125	77797	78236	73881	84975	73115	80983	78058	83790	79658	74344	72411	81256	68091	42175	41973	48253	43593	41194	41061	48229	41041	20025
-4.76667	7194	7248	8890	8939	7639	7379	9240	8247	39148	38513	41685	41323	35596	34712	38923	37162	38737	37468	44399	41909	37782	34660	38846	39120	81420	76958	85565	77265	78286	74369	85577	73463	80301	77546	84329	79975	75565	72578	81346	68663	42414	42424	48337	43976	41282	41330	48078	41470	20159
-4.68333	7101	7867	9067	9153	7782	7525	9177	8212	39492	38436	42446	41571	35943	35471	39604	37807	38155	38373	45040	42330	37874	34442	39088	38999	81698	77174	86213	78774	78847	73878	85001	73612	80520	79081	84532	79596	75504	73354	80979	68596	43180	42674	48090	44135	42088	41650	48201	41150	20241
-4.6	7345	7700	9275	9062	8045	7611	8890	8464	39457	38105	42204	41369	36539	35183	39870	37586	38274	38180	44957	42295	37817	35041	39137	39403	81645	77140	85118	78286	78968	74267	84751	73374	80152	79024	83960	79940	75351	72288	81328	69462	42539	42493	48559	44054	41538	42190	48613	41716	20400
-4.51667	7755	7744	9199	8944	7940	7794	9432	8252	39776	38567	42378	41321	36463	35497	39329	37860	39708	38354	45648	42264	38059	35470	39745	39444	81987	77288	85968	78622	78794	74375	85324	73983	81125	78524	84792	80219	75028	73252	82070	69071	42677	42600	48622	44072	42142	41203	48272	41186	20585
-4.43333	7621	7859	9343	9140	8186	7564	9369	8494	39939	39320	41900	41365	35658	35597	39631	37976	39168	38391	44887	42959	37904	35340	40213	39831	81315	78246	86257	78277	79150	74944	84574	73502	81282	78417	84824	79172	75269	73425	82642	68289	42962	43130	48101	44329	41766	42156	48284	41746	20759
-4.35	7550	7853	9369	9363	7927	7868	9473	8583	40387	39234	41965	41772	36114	34746	40331	38071	39181	38684	45522	43045	38503	35611	39597	40363	81334	77949	85878	78392	79123	74803	84954	73602	80996	78825	84974	79352	75858	73809	82158	68832	42837	43107	48813	44511	42634	41497	48807	41989	20875
-4.26667	7504	7745	9349	9502	8181	7823	9718	8548	39920	39434	42075	42009	36325	35958	39991	38072	39205	39302	45695	43159	39090	36235	39846	40287	81807	77340	85724	78613	78825	75210	84618	73932	80842	78525	84364	79668	75080	73235	82224	69262	42990	43166	48478	44259	42199	41901	49129	41477	21460
-4.18333	7679	7829	9619	9420	8430	8073	9679	8618	40577	39646	42655	41298	36268	36153	40079	38131	39491	39077	44854	43222	38317	36487	40587	40364	81972	77629	86468	78245	79269	74569	84657	73956	81798	78519	84981	79913	75042	74056	82406	69085	42978	42870	49033	44119	42462	41513	49091	41781	21380
-4.1	7558	7939	9362	9645	8473	8122	9769	8615	40256	39420	42513	42263	36838	36282	39800	38865	39632	39056	46429	43644	38565	35994	40507	40722	81860	78034	86952	78666	79642	75621	85485	74213	81265	79047	84270	80060	75127	73423	82535	69164	43305	42397	49022	43875	42213	41700	49023	42184	21338
-4.01667	7897	8229	9549	9505	8247	8007	9583	8611	41100	39755	42692	42091	36510	35854	40539	38627	39345	39392	45974	43570	38756	36001	41042	40042	83204	77786	86099	78194	79716	75547	85550	74243	81579	79015	85715	80296	76091	74444	82877	68981	43450	43533	48721	44540	42513	41891	49270	42176	21590
-3.93333	8076	8238	9764	9759	8488	7847	9825	8844	40806	39277	43235	42087	37042	36622	40492	38571	39766	39375	45843	43710	39072	36813	41382	40647	82049	77375	86069	77737	80254	75714	85951	74313	81564	79743	85581	79703	76570	73624	81944	68992	43368	42949	49324	44272	42348	42432	49309	42350	21964
-3.85	8166	8368	9737	9779	8498	8134	10111	9025	40853	39841	43044	42216	36925	36295	40356	39433	40327	39716	46284	44168	39263	36856	40870	40768	82044	77620	86284	78018	79800	75574	85641	74790	82091	79288	85726	80694	76478	74180	82033	69215	43994	43736	48918	44718	42895	42115	48818	42401	21626
-3.76667	8230	8451	9965	9926	8539	8468	10158	9083	41018	40422	43030	42783	37344	35979	40862	39019	40049	39337	45901	43950	39295	37087	41480	40749	81829	77379	85987	77935	78915	75595	85229	74523	82304	78992	85625	80200	75568	73329	82875	70201	44225	43475	48695	45003	42755	42330	48853	42934	21795
-3.68333	8156	8529	9758	9820	8612	8633	10289	8967	41484	40083	43119	42613	37221	36846	40589	38808	40469	39992	45730	44342	38728	37287	41470	40956	82237	77835	86521	79051	79405	75588	84954	74321	82308	79721	84928	80982	76205	73401	82388	70363	43542	43396	48588	44542	42426	42948	48771	42588	21977
-3.6	8162	8551	9986	9939	8657	8302	10424	9098	40996	39756	42975	42237	37140	36699	40647	39477	40678	39989	45768	44090	38730	37064	41641	41463	82610	77322	86486	78255	79195	75962	85300	74330	82224	79095	85054	79946	75239	73765	83112	70693	43878	43298	49237	44705	42797	42323	49070	42195	22033
-3.51667	8343	8575	9980	9787	8843	8304	10373	9107	41911	39879	43108	42392	37505	36771	40912	39502	40928	39881	46547	44441	39762	38016	41383	40685	82264	78009	86414	78577	79359	75023	85484	75082	82215	79550	85342	80256	76133	73674	82008	69815	43765	43539	49684	44392	42816	42645	48887	42168	22190
-3.43333	8525	8596	10123	9964	8880	8364	10166	9184	41371	40330	43130	42095	37294	36561	41044	39606	40272	39955	46679	44736	40397	37899	41115	40784	82009	77779	86316	79076	79019	75037	85655	74783	82241	79663	84881	80851	76619	74328	81986	69901	43552	43984	49628	44705	43266	42695	49069	42579	22518
-3.35	8411	8780	10360	10077	9102	8818	10468	9322	41237	40478	43236	42835	37641	36833	40833	39650	40946	40266	46246	44471	39184	37846	41531	41448	82340	78224	86359	78565	78925	75923	85850	74907	82554	79623	84757	80349	76357	74499	82169	70034	43854	43975	49576	45106	42945	42198	49746	42754	22505
-3.26667	8636	8812	10401	10188	9141	8743	10485	9252	41254	40304	43499	43042	37752	36671	41253	39817	40695	40228	46599	44337	39323	37932	41749	41667	82502	78532	86428	78721	79690	74826	85312	74783	83107	80056	85539	80384	76724	74771	82105	70428	43272	43423	48801	45042	42533	42718	49357	42999	22254
-3.18333	8483	8707	10433	10448	8975	8682	10489	9656	41903	40677	43497	43186	37813	36522	41244	39652	41159	40392	46579	44477	39887	38277	42157	41774	82420	77684	85556	78884	80074	74893	85840	75140	82652	79552	85725	80124	76330	75447	83038	70630	44303	43904	49438	44682	42947	42838	49175	42465	22624
-3.1	8567	8895	10494	10431	9108	8994	10837	9480	42125	40246	44062	43134	37730	36668	40854	39791	41329	40616	46834	44611	39297	38535	41821	42047	82939	78387	86653	78633	78684	75361	85171	74766	82722	79682	85591	80954	76004	74610	82995	70052	44113	43726	48973	44916	43162	42178	49315	42717	22939
-3.01667	8906	8868	10510	10291	9049	8852	10744	9668	42173	40808	43797	43259	37714	36685	41291	39868	40999	40436	47050	45195	39565	38442	42186	41570	82702	77857	86830	79160	79098	76111	85211	75070	83358	79314	85065	80286	76180	74380	82765	70763	44462	44024	49213	44505	43278	42954	49487	41990	23073
-2.93333	9053	8974	10327	10692	9031	9081	10726	9745	42439	40423	43960	42648	38498	36836	41516	39741	42120	41095	46346	45219	39848	38725	42368	41909	82210	78738	85437	78666	79649	76418	85104	75183	83032	79903	85412	80837	75906	75121	82344	70264	44191	44250	49532	45267	42963	42802	49234	43069	23006
-2.85	8742	9019	10856	10790	9147	9063	10842	9667	42325	40988	44574	43368	37993	37082	41770	40235	41097	40706	46983	45254	39969	38359	42208	42215	82556	77502	85309	78544	79526	75790	85987	74431	83897	79122	85636	80568	76478	74071	83144	70468	44702	43911	49304	44748	42567	43014	49231	43090	23592
-2.76667	9199	9224	10635	10650	9198	9207	10892	9685	42868	40500	43325	42812	37816	37308	41770	40236	41337	41141	46998	45019	39397	38865	42329	41853	82539	78296	85973	78579	79616	75989	84676	75009	82526	79891	85588	81210	76297	74177	83286	70153	44349	44578	48543	45184	43115	43249	49789	42473	23732
-2.68333	9053	9054	10835	10667	9235	8900	10790	9807	42574	40560	44029	43252	37950	37331	41657	40339	41285	41586	46842	45342	39444	39310	42542	41967	82756	78491	85879	78289	78864	75419	84554	74945	83527	79834	85706	80345	76397	74734	82564	70103	44006	43975	49022	44637	42970	42845	49524	42961	23462
-2.6	8811	9175	11096	10844	9576	9083	11010	9898	42890	40219	44070	43347	38744	36920	41153	40227	41669	41038	46737	45351	40121	38951	42871	42361	82344	78420	85561	78400	79822	75233	84816	75568	82363	80081	85121	80619	76630	74035	82948	71002	44095	43798	50061	45811	43068	43278	49154	43314	23488
-2.51667	8960	9355	10774	10929	9573	9242	11125	9935	43039	41276	43733	43279	38235	37196	41675	40330	42165	41722	46758	45847	39997	39075	43066	42375	83163	78684	85722	78677	78980	74766	85590	75294	83399	79805	85332	80765	76494	74626	82253	70464	44634	44837	49694	45194	43617	42675	49620	43318	23768
-2.43333	9271	9233	10901	10801	9538	9269	11308	10020	42550	40660	43580	43579	39106	37602	41066	39942	42130	41676	46837	45279	39981	39637	42349	42783	82100	77669	85705	77728	79148	75045	85939	75376	83284	80287	85326	80235	76699	75045	83574	70823	45043	44624	49284	45442	43318	42724	49912	43103	23355
-2.35	9256	9357	10826	11017	9550	9115	11346	9897	42389	40835	44247	43446	38384	37206	41715	40413	42125	41861	46514	45607	39700	39475	43202	42404	81779	77205	85231	78195	78925	75141	85301	75147	83645	79852	85165	80797	76085	74046	82550	71080	44391	43987	49162	45427	42758	42899	49942	43028	23905
-2.26667	9178	9380	11169	10934	9465	9523	11464	10131	42804	40413	44547	43163	38761	37009	41685	40507	42321	41622	47252	45302	39837	39623	42895	42011	82649	78616	86300	78588	78705	76036	84651	75167	83605	80525	84487	81120	76590	73895	82618	70784	44510	44215	49225	45290	42707	43149	49063	43409	23861
-2.18333	9118	9671	11143	11224	9634	9212	11506	10191	43218	40692	44156	43953	38145	37811	42034	40695	41983	42092	47455	45679	39636	39419	42674	42650	82502	78423	85637	77946	80116	75616	85506	75462	82818	80224	85027	80983	75988	74424	82772	70930	44892	44545	49924	45174	43840	43146	49737	43174	23663
-2.1	9427	9448	11032	11074	9810	9418	11338	10120	42771	40549	44636	43256	38191	37599	41974	40540	42421	42043	46915	45483	40094	40037	42864	43020	82635	78075	85637	79119	78856	75822	85009	74551	82795	79608	85150	80690	76505	74834	83005	70549	44196	44456	50002	45284	43205	43107	48984	43484	24140
-2.01667	9283	9558	11062	11212	9770	9621	11528	10405	43162	40530	43899	43188	38565	37164	42077	40547	42136	42300	46745	45374	40215	39603	43582	41826	81685	78473	85454	77764	79089	75779	85396	75013	83552	80545	85314	80673	76012	74556	82254	71316	44502	44190	49796	44887	43326	43104	49830	43278	23990
-1.93333	9550	9522	11268	11226	9693	9534	11401	10547	43014	41327	44416	43471	38995	37283	42159	40479	42103	42133	47402	45583	39729	39995	42498	42846	82322	78344	85755	78806	78870	75767	84921	75441	83511	79811	85333	80800	76341	74868	82532	70791	44836	44713	49485	45157	43548	43430	49701	43333	24259
-1.85	9713	9821	11289	11250	9812	9528	11338	10150	43548	41054	44551	43456	38830	37854	41995	40573	43041	41925	46977	46023	40033	40410	42788	42900	82848	77497	84857	78513	78772	74878	84782	74587	82748	79844	84506	80608	75831	74961	82461	70572	44959	44784	49356	45360	43326	43636	49875	43608	24386
-1.76667	9721	9589	11412	11175	10063	9672	11722	10326	43236	41352	44547	42955	39356	37574	42073	40417	42493	42144	47100	45851	39527	40334	43443	42765	82354	78064	85186	77833	79071	75555	84474	75425	83481	80136	85429	80632	76322	75154	82974	71072	44746	44510	49359	44454	43492	43889	49499	43582	24462
-1.68333	9812	9772	11302	11098	9943	9905	11969	10360	43434	41206	44222	43239	39010	37562	42140	40954	42614	42619	47842	45876	39710	40172	43695	43054	82097	77844	85069	78093	79036	75315	84928	75056	83127	80179	84975	80932	76265	74910	83463	70983	44972	44496	49528	45083	43395	43317	49723	43451	24338
-1.6	9883	9761	11278	11438	10131	9918	11706	10378	43302	40356	43909	43345	38587	37592	41934	40979	42990	42152	46640	45820	39944	40109	43127	42628	82384	77716	86209	78252	79374	75292	85123	75425	83295	79933	85294	80378	76390	75051	82265	69800	45021	44394	48991	45004	44041	43181	49034	43608	24592
-1.51667	9614	9996	11606	11473	10020	9892	11901	10487	43533	40660	44232	43158	38394	37663	42007	41394	43130	42479	47373	45784	39756	40355	43226	42985	82295	78185	85620	77704	78671	76469	84871	74572	83276	79623	85491	80965	75979	74737	83094	70791	45241	44354	49951	45525	43230	43323	49842	43315	24585
-1.43333	9629	9831	11587	11671	10095	9865	11687	10880	43319	41517	44739	43547	38275	37913	41867	40732	42575	42613	47339	45778	39636	40384	43099	43212	80994	78741	85138	77983	78652	74800	84263	75357	83847	79872	84833	80983	76288	75069	81926	70385	44983	44713	49103	45428	43510	43525	49511	43067	25000
-1.35	9799	10034	11535	11718	10062	9761	11933	10643	43323	41092	44655	44183	39311	37685	42332	40812	42880	41918	46816	46006	39745	40010	43272	42985	81442	78129	85674	78207	78361	76142	85048	74472	82902	80187	84549	80680	76061	75359	82581	71252	44625	44217	49803	45238	43913	43520	49252	43661	25249
-1.26667	9944	10143	11595	11442	10306	9939	12029	10718	43736	40490	44331	43308	38594	37649	41641	40845	43180	42667	47517	45649	39708	39765	43098	43556	82316	78159	85046	77491	78098	75299	84798	74123	82975	80053	85332	80415	76266	74712	82064	70392	44955	44847	50200	45652	43472	43320	49476	43686	24766
-1.18333	9910	10053	11493	11687	10434	9920	11869	10637	43505	41267	44438	43301	38840	37896	42104	41364	43154	42224	47478	45836	39795	40800	43018	42958	82123	77754	84089	77577	78617	75197	83984	74026	83010	79606	84198	80999	76416	75120	82797	71070	44657	44586	49478	45589	43231	43524	48988	43377	24720
-1.1	10136	10361	11517	11797	10117	10149	12132	10877	43858	41024	44728	43312	38825	37261	42188	40547	42914	42093	46820	46067	39971	40773	43755	43405	82324	77789	84509	77683	77634	75239	84518	75147	82129	79698	84671	81028	75562	74443	82774	70544	44777	45050	49568	45834	43060	43661	49163	43429	24960
-1.01667	10100	10318	11716	11860	10710	10026	11921	10792	44048	40614	44446	44311	38618	37804	42075	41288	43030	42373	47249	45774	39705	40663	43532	42904	82027	78478	85362	77758	78359	75468	84373	75174	83457	79753	84382	80623	76119	74912	82271	70921	44925	44735	49146	45681	43803	43240	49754	43384	24914
-0.93333	10177	10051	11767	11754	10294	10298	11804	10986	43862	41445	44637	43280	38607	37939	42337	41248	43016	42718	47018	46183	39657	40763	44305	43633	81233	77991	85343	78133	78744	74980	84643	75214	82738	79446	84891	80630	75885	75157	82198	70437	44676	45010	49654	45448	43479	43969	49347	43228	24902
-0.85	10105	10238	11923	12063	10364	10089	12061	11122	43112	41210	43786	44084	38795	37903	42049	41468	43361	42597	46890	46360	39336	41340	43176	42956	81444	78453	85384	77341	78451	75189	84314	74615	83371	80599	84152	80585	75308	74105	81829	70634	45295	44656	49386	45766	43803	43138	49867	43978	25028
-0.76667	10196	10445	11669	11906	10670	10238	12178	10945	43789	41085	44550	43499	38899	38099	42069	41331	43013	43201	47158	45791	39673	40761	43459	43868	81298	77434	84587	77774	78078	75004	84679	74658	83461	79821	84530	80944	76355	74467	81732	70313	44923	45119	49489	45286	43595	43877	49196	43412	25191
-0.68333	10387	10242	12099	12186	10727	10449	12529	11139	43421	40891	44384	43740	38478	38198	42222	40722	42761	42877	47379	46637	40174	41167	43289	43215	81870	78296	84485	77785	77880	75102	84776	74486	83384	79938	84879	80958	75622	75079	82960	70622	45495	44876	49723	46097	43966	43761	49135	43559	25269
-0.6	10246	10572	11901	12079	10842	10304	12119	11020	43935	40974	44667	43531	39461	38112	42114	41651	42851	43374	47646	46341	40159	41563	43486	43549	81783	76993	84919	77125	78155	75048	83711	74122	82596	79983	83840	80935	75159	74697	82645	70224	45060	45136	49648	45490	43701	43956	49399	43252	25396
-0.51667	10196	10402	12053	12163	10610	10383	12443	11101	43997	41260	44232	43319	39066	37907	42011	41082	43368	42959	46762	45161	39256	41394	43222	43235	81735	77507	84557	76979	78573	74819	84182	75158	83404	80240	84266	80522	76136	74579	82398	70622	44788	44576	49554	45665	43162	43681	49551	43573	25206
-0.43333	10304	10486	12349	12088	10781	10299	12367	11102	44193	41101	44385	43972	39125	37979	42435	41403	43643	42749	46957	46681	40108	41645	43702	43731	81207	77770	83560	77693	78025	74427	83721	74465	83558	79893	84731	80634	75298	73921	82447	71007	45907	44930	49452	45642	43984	43945	49358	43942	25657
-0.35	10430	10347	12058	12186	10701	10299	12549	11087	43633	41372	44545	43161	39160	38362	42243	41174	43418	42872	46908	46262	39229	41668	43665	43436	81403	77660	84323	76666	78327	74264	84133	74431	83412	79572	84226	80763	76076	74532	81796	70766	45146	45007	49739	46114	43688	44175	49093	43465	25209
-0.26667	10381	10351	12356	12016	10665	10390	12543	11337	43958	40508	44090	43294	39000	37637	42024	40898	43073	42710	46843	46391	39500	40851	43296	42922	81214	77057	84355	77165	77167	75171	83700	73948	82761	79820	84151	80477	75118	74013	81658	70352	44963	44749	49652	45288	43393	43810	49925	43527	25603
-0.18333	10470	10530	12183	11921	10954	10592	12618	11140	44732	41160	43859	43829	38444	37713	42056	40980	43430	43199	46849	46598	39783	41613	43838	43014	81188	77159	84130	77149	77800	74204	83566	74245	83373	79834	84259	80848	75486	74603	81772	71191	45430	45229	49806	45377	43822	43575	49762	43422	25539
-0.1	10363	10485	12268	12264	11024	10547	12733	11448	44183	41824	44835	43610	38963	37938	42459	41522	43376	43068	46905	46408	39458	41342	43508	43046	80785	77148	84478	77584	78487	75551	83176	74447	83000	79550	84925	80580	75864	74712	81736	70207	45137	45356	49678	45562	43641	43906	49799	44090	26227
0
0.13333	9511	9398	11039	10883	9934	9442	11063	10089	39282	36693	40697	39338	35244	34358	38344	37365	38071	37244	41697	40193	35720	36649	39637	38976	74631	71568	77799	70692	69946	67735	75819	67374	75763	72073	76702	71765	68478	66148	74000	63400	40642	40092	44886	41055	38820	38917	44900	38933	24597
0.21667	9426	9546	11073	10907	9601	9340	11308	10305	39322	36587	40558	39740	34650	34362	38677	36669	38493	37445	41873	40578	35389	36287	39907	39225	74679	71738	78176	70815	70060	68253	76371	67952	75586	72314	76698	72650	68567	67345	73708	64145	40217	40570	45124	40937	39320	39687	44901	38879	24568
0.3	9297	9545	11122	10854	9852	9232	11413	10174	39641	37160	40909	38834	34635	34719	38163	37067	38599	38097	42467	41098	35826	36179	39716	38900	75261	70719	78191	70889	70709	68320	77138	67953	75166	72393	77565	72598	69072	66885	74378	63927	40451	40194	45331	41091	40328	39531	44768	39440	25004
0.38333	9561	9683	11507	11137	10379	9596	11482	10701	40022	36813	41439	39016	34736	35075	39256	37434	38988	38687	42177	41162	36078	36594	40174	39301	76720	71820	78167	71401	70114	68497	76664	68181	77397	72520	77520	72950	68730	67611	74784	64992	42214	40544	45553	41366	42046	39294	45319	39477	24787
0.46667	10216	9627	11174	10919	11207	9501	11735	10368	40688	37429	41969	39045	35457	34633	39468	38001	39102	37882	42853	41339	36509	36510	40245	40047	79212	71826	78098	71698	71770	68843	76977	68467	79575	73220	78032	73567	69988	67282	74932	64481	43381	40573	45642	41843	44549	40198	45623	39219	24815
0.55	11206	10232	11551	11214	12989	9774	11726	10618	41805	37643	41895	39190	36727	34649	39613	37411	41082	38742	43044	41122	37188	37154	40370	39735	81728	72295	79648	71270	72764	68945	77709	68362	82684	73371	78312	73198	71871	67462	75847	64563	45928	41532	46210	42100	48069	39924	45465	40237	24845
0.63333	12709	10223	11472	11245	14944	9494	11768	10421	44306	37578	41634	39102	37736	35210	39289	37215	43405	38871	42725	40646	37843	37059	41279	39839	86503	71903	79810	72234	74984	68837	77768	68766	87487	74110	78233	73255	74257	67579	75398	64737	49260	41118	45830	41703	51767	40038	46081	40056	25198
0.71667	14695	10026	11311	11358	17215	9869	11692	10563	46242	37847	42677	39303	39547	35707	39929	37205	45675	38572	42688	41418	39736	37327	40804	39917	89779	72606	78899	71597	78476	68776	78131	68637	90675	73991	78783	73851	77789	67993	75573	64992	51734	41768	46244	41642	55279	40962	45780	40182	25450
0.8	16956	10083	11649	11287	19529	9948	11919	10589	48806	37786	41965	39967	41849	35365	39456	38134	49062	39363	43156	40948	41853	36937	40578	40121	93692	72876	79261	72144	82990	68604	78281	68434	94658	73843	78964	74127	81060	68038	75953	64918	55319	42055	46771	41927	59111	41683	46302	39902	25313
0.88333	19575	10308	11783	11288	22015	10293	12384	10739	51832	38489	42456	40316	44047	35007	40173	37693	51769	38838	43271	41727	44237	37863	41247	40284	97219	73915	78712	72389	86896	69394	78535	68113	98425	75330	78428	73616	84577	68607	76290	65066	58053	42892	46804	42444	61501	42989	46207	40631	25780
0.96667	21137	10280	12091	11422	24762	10628	12190	10741	53722	38512	42483	40155	45565	35394	39718	38105	53873	38877	43508	41255	46512	37445	40763	40175	100091	74603	79704	72677	91355	68898	78270	69174	101910	74832	79342	74502	87805	68974	76401	64905	60969	43161	47527	42249	64319	43890	46670	40677	26265
1.05	22725	10477	11747	11469	26101	10858	12181	10962	55977	38858	42204	40482	47874	35458	39923	38183	55745	39653	43683	41406	49132	38145	40811	40247	103774	75202	81056	72382	95837	69891	79014	69319	105167	76629	80305	74227	90815	69637	75780	65363	63846	43999	46820	42278	67428	45887	47338	40176	26990
1.13333	24903	11053	11893	11917	27848	11553	12699	11041	57229	39447	42836	40467	49103	36042	40676	38257	57457	40138	43435	41588	51583	38547	41067	40171	105069	76537	80532	72711	99963	69981	78485	68383	107124	78157	80054	74181	93668	70668	76003	65680	65714	45198	47208	42756	69138	47519	47786	41689	27371
1.21667	25695	11782	12041	11588	29209	12364	12960	10905	58532	39975	42320	40588	50826	36064	40514	37904	59477	40735	43598	41233	53410	38748	41489	40089	107226	78529	80914	73479	103310	70346	78519	69039	109428	79046	79797	74109	96435	70829	76579	65432	68014	45995	47698	42605	72040	48979	48469	41801	28117
1.3	27289	12046	12185	11975	30298	13340	12937	11210	59821	40399	43942	40574	51454	37029	40206	37991	60608	42111	43637	41669	54603	39623	41591	40346	112552	79558	80934	72229	105479	71460	78440	68874	111357	80820	80977	74280	98785	71510	77139	64934	70040	47343	47594	42524	73103	50763	49144	41190	28289
1.38333	28279	13146	12531	11837	31231	14713	13061	11165	60789	40964	43186	40088	52886	37545	40596	38326	61099	43129	44000	41636	55943	40328	41571	40783	112665	80799	82403	72382	111562	72404	79389	68532	112403	82494	80915	74894	99517	73162	77629	65477	71709	48966	48382	42563	75252	53225	50009	41788	28797
1.46667	28760	13726	12450	11848	32576	15305	13606	11106	62121	42747	43750	40418	53652	38153	40821	38600	62812	44918	44184	41584	57091	41577	41936	40576	114005	83462	82318	72404	109916	73441	79248	69192	116932	84194	81920	74889	102151	75305	77147	65272	73574	50424	49140	43256	77202	54454	50557	41637	29579
1.55	30134	15150	12929	12209	33172	16483	13806	11620	62714	43372	43397	40713	54809	38927	41057	38562	62970	45595	44185	41757	58838	42606	41832	40245	113297	84601	83011	73281	112815	74913	79691	68996	115359	85537	82846	75090	102704	76647	78113	66123	74843	51770	49663	43357	78158	56189	51762	42249	29823
1.63333	31063	16160	13132	12266	34091	18026	14438	11670	63303	44645	43496	40810	55249	40473	41849	38729	64007	47273	44304	41757	59823	44374	42296	41078	115911	86846	83638	73386	113229	76709	79205	69455	117447	87289	83745	75707	103567	78340	78269	65895	75371	53240	49695	43837	79946	57666	52440	41620	30414
1.71667	31447	17146	13710	12181	34605	19344	14599	11723	64060	46074	43937	40828	56044	41340	41355	39077	64812	48687	44592	41900	60583	45114	42020	40833	115766	88087	84475	73093	115075	77833	80172	70348	119060	89755	83905	75684	104763	79473	78719	66032	76992	54674	50848	43202	80434	59763	53761	42241	30863
1.8	32226	18389	13692	12310	35460	20549	15208	11828	64458	47421	44881	40799	56605	42229	42062	38521	65901	49833	44851	42518	61249	47520	42412	40765	116529	90006	84412	73201	121446	80482	79506	70093	123106	90548	84529	76354	105069	80813	78468	66403	78101	56078	51601	43331	81456	61054	54995	42453	30791
1.88333	32697	19588	13916	12330	35945	21699	15909	12049	64648	47493	44800	41046	57722	43658	41831	38803	65374	51173	46119	42132	61937	48597	43412	41553	120082	91232	85121	72970	118898	82161	80135	69809	118718	92273	85841	75918	104726	83482	79538	66487	78964	57018	52735	43803	82208	62346	55964	42922	31691
1.96667	33287	21062	14713	12583	36304	22946	16238	12092	66157	49353	45487	40653	57718	44604	42419	38572	66552	53312	46653	42350	63178	50396	43373	41431	119902	93341	86904	73772	117764	84751	81443	69458	121203	95221	86542	76123	109439	85836	79526	66270	78518	59517	52697	44442	83194	63381	56464	43265	31940
2.05	33884	21971	14752	12590	37080	24541	17401	12059	65954	50544	46093	41016	59039	45637	42420	38446	67302	54376	46165	41624	63001	52309	43375	41156	117337	94408	87485	74190	122962	87019	81655	70084	119651	96104	87010	76239	106397	86849	81283	66691	80281	60461	54150	44320	83621	65934	58402	43717	32168
2.13333	34157	23186	15376	12933	37639	25184	18111	12249	66609	51523	46474	40872	57805	46748	43301	39618	67215	55606	47010	42054	63988	52950	44053	41318	117286	95959	88243	74323	121450	89058	82166	70211	121636	97765	88861	77127	108874	88981	80966	66939	80718	61956	54534	44806	85292	67159	59021	43983	32234
2.21667	34710	24189	15806	13017	37951	26588	18530	12736	67930	52904	47090	41465	59183	47671	43926	39204	67326	56827	47922	42370	64092	55146	44701	41040	120383	97312	90352	74789	124545	92088	82948	69802	119682	99536	89034	76812	110098	90400	81482	67105	81073	64023	55792	45531	85808	68874	59745	44784	33004
2.3	35231	25471	16469	12957	38116	27066	19331	12480	67489	54043	47568	41318	59139	48790	44389	39532	68274	58697	48515	42608	64610	55677	45452	41491	118896	100399	89946	74641	124058	94426	82977	69841	121807	101659	91217	77335	109728	91578	82903	67239	81424	64628	56485	45285	86020	69787	61169	44773	33532
2.38333	35540	26314	17257	13134	38746	28328	20342	13092	68055	54632	48194	41543	59145	49458	45176	39073	68627	58760	48973	42626	64607	57054	46313	42063	119942	100577	91566	74985	124704	95833	85127	70122	123257	102455	91307	77741	112254	92786	83595	66743	83149	66207	57165	45050	87305	71200	62296	45346	33229
2.46667	35654	27101	17751	13427	38908	29016	21335	13058	67446	54861	49335	41455	60303	50410	45676	39048	69196	59855	49684	42881	65398	58508	47115	41650	122887	101901	92914	75229	124393	99002	85496	70558	122470	104440	92541	78318	112796	94779	84843	67893	83378	67149	57641	46145	86778	73058	63808	45628	33684
2.55	36242	27987	18700	13684	39691	29947	22140	13543	68592	55890	49716	41746	60173	50661	46660	39814	69365	61056	50754	42840	65323	59743	47792	42569	120820	103171	93669	75980	124799	99339	86089	70826	122558	105316	93304	78117	112714	95854	85621	68083	83692	68514	58419	45651	87618	72908	64442	46695	34166
2.63333	36064	28757	19006	13604	39359	31118	22674	13515	68778	56744	50355	41332	60905	50950	47439	39819	69152	61043	52003	43077	66012	60773	48425	42468	119342	103755	95029	75994	124154	101183	86705	71093	121071	106029	92788	78805	109929	96538	85721	68037	84310	68924	60206	46878	87898	73952	65673	46517	34021
2.71667	36223	29654	20144	13867	39998	31486	23749	13711	68896	57130	51744	42187	60541	51398	47471	40299	69064	61576	52564	43177	65638	61206	49113	42341	121551	104716	95007	76291	123427	103970	88324	70820	125857	107109	94832	79120	113740	97701	87155	68009	84133	70302	60600	47317	88426	75851	67097	47677	34453
2.8	37193	30584	20845	13955	40385	32312	24529	13990	68788	57605	52453	42782	60814	52422	48802	39743	69496	63054	53420	43561	66243	62459	50418	42645	121656	105591	97036	76365	123414	106927	89018	70853	125847	103593	95935	79152	113296	98634	88089	67917	85550	71756	61223	47459	88689	77126	67344	48233	34246
2.88333	36747	30435	21337	14338	39949	32634	25551	14283	69582	58174	53207	42216	60971	53046	49153	39749	69679	63350	53584	43537	66755	63504	51304	42226	123129	106656	96842	77130	127856	106549	90439	71227	126580	108209	97338	80182	113617	100408	88850	68954	84849	72822	62636	47510	88979	77828	67742	48659	35085
2.96667	37342	31485	22044	14526	41196	33410	26229	14265	69340	58285	53890	42370	61311	54063	49687	39847	70185	64352	54480	43558	66131	64072	51604	42455	122697	106650	97920	77643	125992	105300	92134	71778	123087	107243	98101	80550	112945	100972	90593	69274	85628	73205	63178	48128	89744	78034	69936	48934	35252
3.05	37433	31406	22868	14561	41432	33727	27237	15106	69651	58714	54348	43483	61595	54274	50873	40318	68889	64538	55694	44059	66937	64745	52045	42662	123799	106643	99419	77531	127854	108678	92955	71767	125395	110371	98505	81640	113102	101889	91604	69316	85980	74583	64872	49140	89888	78827	70002	50065	35075
3.13333	37439	31758	23687	14983	41018	33751	27232	15283	69300	59521	55352	43264	61032	54767	50995	41184	70657	64909	56171	43993	67258	64816	53707	43536	121296	110026	99887	78747	125625	108989	94495	71854	124335	112978	99655	81004	110253	103402	92027	70216	86153	75261	65007	49408	91711	80516	70694	51039	35075
3.21667	38161	33410	24154	14871	41289	34681	28274	15657	69300	60414	55496	43674	62423	54982	51597	40812	70098	64839	57244	45032	67259	66071	54751	43656	124064	109627	101820	79298	130803	111556	96494	72501	124455	109740	101202	82369	113265	103496	93080	69331	87047	76382	66248	49855	91115	80365	71718	51701	36027
3.3	37891	33186	25092	15619	41432	35097	29296	16215	69923	60404	56144	43428	62607	55489	52909	41100	70287	65833	57665	44652	67672	66140	56059	44231	122148	110783	102232	79887	131121	111203	98492	72312	124647	113326	101880	82266	113643	103832	93481	70304	86535	76857	66914	49869	90371	81799	72816	52082	35791
3.38333	38038	33467	25470	15845	42099	35274	29601	16370	69603	60816	56656	44128	61819	55161	52976	41591	70942	66068	58168	45238	67672	66334	55934	44462	122755	110731	102982	79154	129296	113120	99880	73601	128551	113962	102914	82354	116096	106031	96119	71228	86102	76858	67607	50157	90380	82094	73733	52770	36243
3.46667	38850	34320	25944	16124	42036	35837	30486	17129	70215	61619	57699	44525	62006	56220	54069	42357	71260	66001	58493	45915	68465	67400	56868	45100	123397	111348	103550	81726	126060	112658	100751	73246	125835	112042	103006	83663	111898	105992	96334	70874	87304	77630	68373	50924	91300	82193	74703	53944	36368
3.55	38940	34069	27105	16292	42307	36064	30805	17415	69963	61069	57768	44784	62231	55503	54177	41965	70488	66845	59583	45687	68025	68076	57454	45236	125646	111156	105198	81497	128141	112832	101752	73063	125742	112964	103676	84206	113343	104882	96810	71972	87181	78274	69335	52032	91525	82917	75257	53700	36533
3.63333	39033	34835	27037	16576	42154	36828	31140	17752	70237	61693	58462	44990	62354	56238	55474	43132	70547	67309	59773	45684	68036	69085	58189	45426	123378	110259	104986	81407	127704	115791	103133	74006	123141	115076	104695	84536	114754	105738	97351	71797	86480	78712	70319	51808	91145	84100	76063	54378	36644
3.71667	38472	35031	27838	17267	42940	37311	31794	18799	70594	61961	58811	46090	62329	56785	55112	43329	70646	67579	60541	46302	68022	69671	58806	45988	121470	109190	105441	83500	129455	115886	105014	75011	125856	114151	104002	85425	114261	107498	98285	72930	87783	78460	70658	52435	91441	84179	76862	54712	36429
3.8	39127	35933	28882	17615	42573	37115	32642	18913	70160	61124	59254	46152	62663	57281	55753	43386	71177	68241	60419	46372	68149	69142	59436	46749	123876	113447	106642	83223	126950	115062	105582	74528	127832	117376	105992	86117	116292	107658	98884	72870	87530	79123	71658	53497	91623	84213	77323	56232	36662
3.88333	38993	36114	28923	18013	42668	37267	32643	19387	70671	62064	59703	46479	62141	57298	56090	43841	70321	68420	60753	47011	67797	69798	60075	46819	122589	112303	106539	83427	129639	114861	106209	76011	125524	112517	104788	86249	115008	106831	99671	73305	87255	80033	72279	53459	92069	85788	78759	56238	37089
3.96667	39216	35522	29340	18538	42920	37655	33242	20015	70763	63114	60090	46963	62321	57518	56191	44553	70533	67790	60832	47427	68399	70523	61298	47020	123475	113909	106758	84258	128723	115490	105722	75824	126639	114799	108190	86319	115673	106638	101214	74342	87252	80253	73865	53734	92225	85696	79243	57283	36925
4.05	39360	36254	29908	19069	42970	38340	33411	20405	70826	63266	60290	47025	62374	57994	57074	44913	71952	68682	61394	48044	67618	70733	60724	48356	124945	112263	107212	85357	126013	116216	106509	76901	126661	114262	106079	86933	112399	109015	101086	74997	87619	81171	73520	54632	92404	86114	80189	57774	37080
4.13333	39485	36693	30300	19460	42920	37724	34354	21547	70908	62417	60777	47908	62608	58177	57805	45066	70979	68837	61409	48768	67949	70155	62078	48055	123983	113991	109979	85142	131344	117508	110360	77457	126036	113625	108854	87916	115684	106983	101797	75541	88336	81097	73432	55511	91534	86738	80802	58125	37143
4.21667	39552	36269	30653	19837	43336	38695	34502	21618	70829	63469	61420	48124	62534	57791	57674	45158	70885	68804	62016	49404	67810	70725	62059	48585	121124	113611	109338	85179	128656	119311	111038	78356	125042	119841	105332	89023	113740	108205	102580	76812	87717	81578	74204	56497	92226	87018	80664	58897	37638
4.3	39894	36730	30914	20340	43210	38450	34922	22012	70939	63530	61302	48945	62498	58372	57273	46477	70425	69376	62684	49641	67042	71425	63299	49752	121888	114446	108518	86067	124869	120209	108886	78643	124890	116477	107891	89548	112494	107130	103358	76828	87283	81143	75550	55840	92926	86725	81764	59899	37032
4.38333	40362	37482	31515	20795	43175	38924	35071	23008	70880	63469	61579	49559	62758	58315	57483	45678	71865	68787	62510	50198	67708	71798	63186	50363	121796	111913	108156	86968	127672	117525	111914	79456	127735	115539	105270	89542	113161	107126	104817	77171	87948	81974	75998	57888	92733	87790	82149	60559	38083
4.46667	39799	37720	31726	20901	43446	39316	35640	23294	71360	63580	62474	49465	63268	58650	58214	46914	71149	69053	62656	49877	68179	71832	62959	50904	124903	113972	110754	87533	129178	116496	113370	80844	126554	115429	111824	90542	114278	110038	103728	78092	87384	82016	76857	57188	92677	88258	81639	60796	37868
4.55	40347	37098	32263	21730	43632	39042	36376	23907	71194	63277	62389	50270	63435	58837	58537	47661	71066	69764	62328	51031	67603	72130	63844	51465	122086	113026	112645	88116	127280	118724	113140	80474	125908	115148	107237	91565	116305	108240	105133	78235	87884	82630	76154	58588	92179	88538	83332	61392	37541
4.63333	39958	37771	33043	21982	43999	39803	36227	24173	71694	63275	62934	50014	63345	58927	58810	47889	70365	69189	63440	51659	67344	71904	64113	51505	123839	115868	112193	88304	128004	118328	115848	81386	127449	113874	111520	91795	114254	107731	104585	78419	87612	83172	77363	58527	92552	88576	83720	61455	38158
4.71667	40323	37743	32678	22598	43078	39986	36334	24887	71395	63870	63163	51071	62929	59217	59602	48445	70734	70200	62881	50897	68228	72598	64062	52337	121747	113894	114074	88614	130003	119744	115487	82060	126598	117623	111217	92058	113706	110518	106183	79602	88040	82786	77713	58904	92757	88283	83981	62689	37807
4.8	40195	38169	32794	22850	43509	40194	36929	25109	71146	63795	63031	51586	63436	59357	59589	48790	70433	69477	63187	51961	68252	72678	65090	53011	123651	112996	111042	90418	127111	120188	115905	83134	123217	115823	113005	92698	113132	110282	105059	80185	88390	83205	78000	60029	93443	87969	84723	62466	38152
4.88333	40307	37532	33450	23330	43794	40294	37347	26077	71470	63972	62565	51511	62394	59261	59476	49032	70872	69610	63216	52573	68358	73063	65311	52923	125549	115349	112010	90377	131333	120729	117277	83949	127422	116621	110063	93908	115968	108863	109525	80653	88024	82722	79150	60451	93271	88205	84440	63704	38023
4.96667	40195	38034	33245	24054	43639	40755	37072	25731	70943	64246	63382	52476	63426	59446	60894	49526	71939	69554	63221	52724	68189	73306	65619	54281	124137	112913	111305	90981	125234	122099	118390	84621	126374	117428	113909	93772	117512	111263	105155	81382	87380	83189	78948	60294	91696	89124	85861	64758	38533
5.05	40671	38973	34069	24097	43316	40697	38372	26718	71334	64470	63871	52248	62908	59664	59933	49640	70335	69721	63569	53086	68185	73531	65621	54458	120262	111609	112739	91122	128602	119858	118548	85793	125333	116553	112580	93700	112620	110323	106581	81741	87892	83623	79537	61571	92673	88965	85299	64951	38517
5.13333	40513	38648	33613	25109	43427	40754	37860	27301	71321	64639	63707	52956	63121	59484	60862	50414	71151	70300	63705	53522	68007	73670	66284	55258	120564	113088	111105	91750	127045	120103	119542	86949	124945	115471	114150	94777	117313	108639	106313	82626	88210	83331	79040	61727	92270	89420	86711	65399	38681
5.21667	40936	38866	34202	25178	43652	40616	38719	27413	71341	63946	63904	52987	62993	60555	60641	50949	71026	70071	63664	53758	67308	73686	65366	55486	122785	114458	113821	92614	130237	122506	118933	87338	125236	116583	113588	96076	114009	108726	107230	83059	88238	84089	80095	62367	92477	89980	86939	66139	38287
5.3	40446	38676	34527	25794	43967	41233	38197	27859	70389	64395	64183	53190	63518	60318	60845	50859	70239	69986	63655	54547	67406	73759	66479	56558	121184	113512	112719	92552	130571	119362	116588	88676	124665	117627	112539	95817	113565	108010	108937	83033	88021	83972	80555	63050	92348	89952	87157	66423	38780
5.38333	40945	39501	34880	26219	44697	41015	37803	28088	71254	64264	63888	53702	62746	59321	60823	51196	70734	70407	63747	54622	67463	74150	66267	57116	122133	114169	114082	93082	127904	123091	119045	88293	126111	119500	115033	96531	115577	106799	107572	84208	88384	84048	80576	63676	92722	89788	86860	67532	39341
5.46667	40953	39159	35272	26686	44606	41092	38478	28979	71314	64416	64588	54682	63183	59565	60859	51650	70228	69514	63387	55140	66878	74125	66519	57196	122218	112877	114027	93559	127722	121081	118358	89393	126941	116097	114447	97389	113221	108414	109089	84480	87922	84402	81167	64147	92420	89902	87496	67544	38748
5.55	41096	39473	34804	27196	44172	41558	38957	29429	71193	64598	64634	54616	63974	59771	61776	51256	70972	69704	63892	55048	67405	73958	66341	57856	121730	115208	112500	93759	128165	119671	116187	90168	124200	115011	114166	97070	112804	108890	108830	84324	87785	84978	81221	64569	92360	89994	87532	68427	38627
5.63333	41237	39331	35516	27738	44390	41698	38922	29336	71542	64699	64472	54602	62796	59805	61670	52607	70423	70065	64006	55342	67173	74301	66907	57669	121277	114697	112889	94312	127755	120809	121243	90823	123196	120450	115855	97605	118132	110692	107100	84580	88545	84617	81787	64727	92336	90683	88070	68210	38793
5.71667	40824	39344	35536	28030	44281	41632	39740	29940	71284	64904	64030	54996	63318	60400	61268	52146	69657	69471	64467	55501	67499	74219	66965	58468	122676	117705	111055	95072	130065	122108	120307	92260	125586	119500	114345	98144	109179	110488	106440	85877	88274	84264	81724	65224	92418	90827	88870	68778	38962
5.8	40868	39288	35739	28096	43881	41784	39375	30000	70642	65053	64375	55018	63764	60283	61861	52078	70682	70041	64574	55358	67154	74212	67445	59156	124602	112932	115422	94873	130270	119537	118016	93846	123268	118042	110865	99035	113772	109303	110226	85815	88554	84806	82864	65747	92555	90860	88061	69270	39667
5.88333	40709	39209	36168	28567	44676	41894	39617	30158	71007	64922	64516	55725	62621	60050	61505	53258	70158	70446	64348	55564	67005	73592	67491	59578	122055	113095	114691	95672	123890	118490	121535	94488	130166	118651	113847	99435	117115	110444	108033	86759	87784	84645	82493	65830	92656	90861	89174	70279	39059
5.96667	40609	38987	35659	28958	43751	41724	39631	30840	71150	64848	64448	56132	63344	60413	61982	53107	69869	69967	63826	56047	66642	74566	67837	60570	122458	113578	115237	96617	128503	118449	120860	94365	124252	116910	113355	99185	112310	107262	109470	87112	88228	85154	82040	67045	93208	90812	88668	70277	39111
6.05	41526	39451	35684	28838	44497	41991	39619	30937	70763	64935	65072	55911	63014	59867	62598	53757	70235	69835	63714	56317	67408	75457	66989	60636	122508	114206	113571	96236	127597	121075	120769	95686	125368	118982	118157	101022	113331	111442	108682	87563	87928	85482	82498	67403	91730	90786	90061	71047	39241
6.13333	41411	39460	36218	29810	44069	42000	39552	31295	71437	65214	65095	56947	63566	60404	62584	53927	69933	70273	64122	55848	66478	74719	67218	61142	121668	115142	116559	97061	127033	120402	123387	96107	122833	117056	114428	100610	111588	113334	109960	87912	88642	85469	82296	67775	91973	90838	89739	71447	38980
6.21667	41565	39681	36142	29518	44899	42314	40178	31927	71079	64543	65779	57451	62895	60016	62217	54034	70056	70650	64098	56299	67184	74703	68236	61061	123527	113245	114353	97730	125444	121837	120083	97030	121922	117658	115208	100132	114513	111864	110860	88657	88048	85688	82506	68603	91945	90987	89664	71413	39217
6.3	41709	39681	36460	30237	44483	42408	39463	32142	71176	64818	65382	56084	62493	60629	61905	54173	70523	70575	63942	56312	67281	74842	67592	61031	123437	112859	112867	98270	125170	119869	122324	97874	123413	118375	112926	101172	111491	109320	108012	88026	87914	85036	83162	68521	92052	90745	89233	72010	39384
6.38333	41400	39393	37152	30663	44165	42537	40229	32739	71283	65269	64810	57188	63528	59894	61553	55293	70013	70849	64124	56112	66494	75133	68070	61184	121819	115733	114543	98159	127514	119028	123095	97840	125709	117984	116388	100927	110441	111780	109731	89173	87509	85301	83207	69059	93089	91410	89321	72719	39234
6.46667	41315	39701	36867	30086	44207	43079	40448	32526	70877	64356	65503	57799	63192	60041	61521	54918	69914	70592	64135	57139	66084	75093	67510	61788	122415	113477	114302	97815	130595	120995	122674	99444	123315	117783	113655	101995	114237	109236	111718	88942	87420	85119	84326	69144	92267	90932	89801	73497	39558
6.55	41572	39679	36796	31216	44254	42631	41056	32744	70566	64563	65497	57181	64183	60422	62614	55309	69376	70187	64324	56533	67290	74956	68641	62209	118756	114180	116082	99347	130030	119874	123353	99211	124502	119117	115516	102795	113286	109892	108407	90042	87892	84730	83505	70280	91971	91041	91000	73061	39680
6.63333	40990	39864	37265	30547	43727	42902	40594	33346	70696	65081	64721	58226	62987	60384	62654	55155	69972	71200	63867	57248	66067	74550	67835	62682	119574	112967	112362	98923	123802	121399	121890	99402	123758	118735	116485	102835	114620	110779	108827	90197	88240	84826	83862	69767	91741	90589	90293	73820	40037
6.71667	41084	39923	37448	31212	44619	42155	40501	33099	71016	64554	65785	57531	63174	60701	62749	55235	69975	70991	64164	58061	66042	75480	67967	62202	120662	112781	113870	99752	125105	120726	123078	100118	124607	118677	114106	102841	112229	110533	108490	91087	87448	85722	84193	70673	91464	90506	90284	74261	39467
6.8	41444	40182	36905	31309	44313	42174	40613	33514	70926	64898	65826	58195	62676	60826	62210	55216	69556	70247	63872	56933	66311	74985	68344	62990	120199	114553	116099	99900	125808	119983	122100	101317	126222	116295	113698	103273	112608	107369	111875	90779	87424	84912	83389	70831	92012	91147	90698	74733	39849
6.88333	41483	40129	37384	31620	44431	42480	40505	33619	70560	65242	65510	58577	62962	60385	62682	55207	69189	70851	63523	57117	66214	75416	68399	63036	121233	116037	115755	99811	126129	120247	122344	101404	124433	119116	113701	103675	112237	111781	108910	90898	87560	84750	84367	71351	92142	90708	90531	74715	39303
6.96667	41800	39601	37304	31737	44253	42391	41244	34413	70773	65216	65228	58516	62799	60792	62610	55613	69470	70730	63091	57439	65736	75968	68787	63698	119186	113827	118404	99774	122998	118619	126184	101815	122550	116469	116318	102803	112763	107902	110699	90574	87870	85712	84192	71586	90992	90936	90460	74780	39681
7.05	41085	40230	37835	32104	44523	42552	40921	34366	71000	64753	64700	59086	63244	60693	62426	55216	68692	70654	63729	57127	65141	74995	68198	63474	119939	113220	115632	101036	123015	119657	124435	102687	122064	118902	112770	104277	111201	108579	113948	91490	87405	85718	83756	71810	91151	90635	90115	75453	39484
7.13333	41196	40141	37404	32377	44955	42148	40967	34677	71297	64703	65832	58729	63116	60985	62629	55857	69051	70697	63687	57730	65805	75431	68498	64505	121329	115322	114930	101383	127501	120243	121900	102462	122143	115906	113015	104503	113290	108081	107276	92023	87827	85092	84288	72718	90833	91416	90760	75225	39498
7.21667	41431	40239	37285	32479	44155	42495	41578	34326	70947	64338	65453	59062	62431	59974	62685	56453	69513	71508	63491	57720	65936	75931	68845	63945	116491	114545	117990	101394	127574	121029	124056	103388	122836	115897	112973	104254	113027	109075	109575	92352	87987	85515	83993	72651	91329	90911	89731	76038	39434
7.3	41887	39726	37792	32592	44401	42194	41674	34826	70435	65441	65431	59266	62814	60670	62640	55615	69906	71022	62560	57226	65165	74513	68408	63972	120102	114340	114197	100439	124591	118939	121277	104151	120479	114460	115435	105577	113105	107210	108356	92219	86898	85934	84334	73318	91330	91332	90766	76304	39906
7.38333	41439	39938	37607	32372	44276	42853	41490	34705	70522	64482	64918	59641	63176	60088	63131	56495	69781	71297	63163	57293	65388	75747	67949	64291	120843	115384	114439	100906	125551	119666	123210	103436	120256	114691	113617	104401	115405	107258	110934	93197	87164	84881	84587	72879	91721	90722	90342	76412	40116
7.46667	41120	40209	38646	33208	44371	42273	41358	34473	70896	64151	64416	59458	63325	60785	63536	56182	68542	71510	63755	57443	65205	75707	68758	64565	121181	115468	115049	101095	124723	119588	121894	105032	120768	117986	114063	105730	110668	106743	109991	93039	87828	86289	83595	73869	91154	90281	90544	76918	39441
7.55	41018	40467	38275	33393	44146	42721	41906	35175	70468	64491	65190	59747	62676	61129	62864	56721	68974	70737	63441	58014	64925	75948	68031	64569	121970	117384	115556	100486	123189	119242	121132	104900	123810	117377	115317	105416	110647	109757	113214	92593	87339	86199	84458	74664	90731	90674	91087	76640	39524
7.63333	41555	39871	38988	33570	44013	42977	41327	35185	70562	65085	65397	59489	62873	60935	62761	56968	69335	71287	62855	57266	64783	76058	68541	64175	118722	114337	115049	101343	124024	120044	121900	104777	122545	117522	113982	104532	112336	108455	108100	93305	86929	85504	85564	73477	90807	90852	90329	76840	40113
7.71667	41818	40087	38967	33398	44237	43432	41552	35389	70672	64866	65319	59733	62669	61269	63173	57301	68387	70410	63674	57454	64964	75225	68866	64939	118929	112427	115638	101977	125412	116618	119091	105671	121324	119267	114542	106238	112547	107157	113965	93215	86329	85496	85159	73899	90987	91046	90667	77908	40374
7.8	41176	40231	38617	34050	44305	43641	41972	36225	70805	64898	65023	59546	62344	60704	63288	56275	68351	70457	61977	57372	64700	76466	68232	66216	119759	114693	114200	101750	121633	118405	121807	106052	120789	117763	112459	105724	111026	109613	109061	94067	86932	85791	84425	73965	90923	90706	91133	77871	39751
7.88333	40860	40527	39055	33627	44343	43209	42156	35764	70471	64983	65740	58989	62647	61137	62407	56910	68417	71014	62573	57571	64880	75087	68433	65211	115584	110953	115518	102458	128091	118464	121141	104302	122257	115152	116325	105367	111493	107215	110091	93752	86171	85198	84088	74113	90932	89500	91346	77097	39696
7.96667	41521	40654	39088	33916	44660	42993	41960	36291	71125	64487	65779	60287	62577	60434	63131	57447	68452	70044	62140	57102	64466	75417	68809	64911	118309	112429	115071	102039	122910	117633	124046	106032	120162	118014	112577	105375	110730	109597	107846	93795	87215	84977	84728	74410	91317	90479	90902	77997	40110
8.05	41349	40059	39010	33870	44798	43109	41466	36277	70800	63814	65204	60101	62399	60005	62878	57406	67940	71188	62434	57195	64191	74706	68634	65722	116652	111450	113519	101852	122091	118710	121729	105335	120556	112346	118678	107158	112118	106834	109829	93733	87071	86163	84490	74777	90259	90387	91286	77467	39468
8.13333	41469	40279	38645	33852	44438	42567	41821	36255	70042	64516	65013	60424	62572	61074	63051	57451	68354	70477	61768	56938	64077	75402	69480	65113	118477	112167	114367	102074	124273	119552	119141	106495	120347	116820	113731	106086	108683	109275	109458	94016	86614	85347	84660	75550	90539	90564	90685	78233	39845
8.21667	41663	40096	39225	34354	44567	42392	42176	36389	69961	63962	65884	59904	62337	60621	63422	56652	68317	71368	62141	57068	63800	75937	68938	65417	119712	112720	112145	103428	123433	120712	122703	106129	121364	116950	114245	106762	110364	110034	109470	94611	86807	85637	85029	74689	89755	90262	90432	78236	40356
8.3	41293	40041	39282	34459	45145	42893	41871	36922	69464	64563	65796	59994	62390	60616	63455	56896	68097	70840	61955	57140	63665	75658	68303	65176	114491	114684	114630	102937	122753	118731	118333	105614	118223	116114	110049	107251	109519	108614	107532	93662	86553	85716	84628	75672	89971	90161	90730	79091	40173
8.38333	40738	40916	39050	34965	44922	42816	41613	36629	69615	64326	65401	60228	62221	60718	63737	58216	67423	70141	62254	57388	63440	75834	68143	65408	116545	114482	115961	102754	123995	116134	122129	106629	119499	117757	116485	108753	111158	107086	109576	93924	86499	84747	84990	75334	89766	90377	91765	78773	39877
8.46667	40999	41095	38981	35029	45095	42714	42075	36572	68978	64138	65347	61350	61791	60608	62528	57343	67558	70235	62241	57433	63729	75682	68925	65992	115072	113583	113309	102543	122061	116600	122753	106085	120024	116243	114984	105531	111382	108029	109321	93698	86572	84500	84486	75624	90467	90297	91119	78404	39974
8.55	41398	40113	39107	34683	44715	43204	42260	37018	69557	64560	65279	60337	62101	60280	63341	57002	66790	70864	62123	57262	63528	75395	68742	65553	118380	110179	112698	102995	123758	119921	121762	106137	119142	117373	117778	106304	108523	107651	110346	94931	85853	85478	84512	75232	90497	90251	90833	79169	40589
8.63333	41688	40109	39474	35110	44876	43805	42024	37430	69647	63962	65298	60239	61926	60305	63262	57684	67604	70933	61645	56956	63910	75657	68472	66360	117453	115650	114696	103517	119779	119090	120942	104902	120596	117504	114154	107772	109457	109857	111494	93516	85791	85446	84521	76581	89337	90020	90943	78411	40202
8.71667	41626	40431	39229	35311	44194	42968	41738	36802	69258	63883	65189	59771	61748	60777	62722	57616	67202	69810	61713	57097	62480	75535	69063	65765	115315	110999	114933	102171	121414	118137	126802	107433	119482	114121	112505	105242	106921	106556	110171	94637	85803	85116	84647	75725	90054	89645	90115	79618	39573
8.8	41112	40357	39086	35059	45152	43547	41976	37360	69532	64038	64550	60449	60927	61251	63043	57970	67777	70244	61565	56351	63521	75108	68134	65917	114169	111572	114867	102717	121066	116892	121363	108574	119572	115854	114379	105149	109417	107637	107871	94838	86452	85425	84314	76202	88970	89922	90556	78936	40183
8.88333	41373	40102	39419	35221	44341	43053	42597	36843	68822	63312	65154	60365	60700	60338	62787	57967	67059	70289	60695	57056	62974	75329	67929	66488	116735	110779	112975	102001	121785	117724	121704	104753	115435	115516	111484	106484	113524	109644	109031	94083	85977	85547	84900	75678	89627	89798	90996	79508	39442
8.96667	40924	41250	39227	35103	44391	42771	42631	37413	69060	63374	65275	60237	61280	61017	63414	57819	67766	69703	61411	55887	62609	75726	68826	66582	115769	111856	114291	103004	122744	118420	120923	107125	118628	116355	113022	108192	108419	109484	108874	93956	85233	84749	84340	76784	89387	90475	90293	79733	39984
9.05	40647	40090	39663	35957	44642	42856	42647	37283	69344	63755	64772	61246	61339	60928	62952	57809	67381	70766	60784	56683	61937	74987	68966	65919	115363	110234	110733	102836	121950	116667	123309	107889	120842	113926	115221	106718	106058	107112	112836	94783	85102	85690	83972	76269	89210	90091	90944	78717	39939
9.13333	41409	39992	39767	34900	44209	43373	42766	37661	69481	63280	65502	60827	61647	60965	63431	57504	67601	70060	60481	56875	62322	76019	67943	66023	112547	113512	112033	102182	123565	117290	123275	105720	120139	112772	112764	107316	107546	107490	112054	94350	85409	85049	84198	76925	89044	89779	90822	80312	39837
9.21667	40965	40509	39469	35333	45270	42717	42907	37663	68907	63742	65019	60534	61090	61227	62723	57752	66745	69755	60912	57272	62451	75140	68720	66165	114858	112231	113324	103207	124765	118163	119813	107242	118515	118480	113104	105594	108955	108967	108351	94660	85433	85087	84238	76631	89277	89236	90497	78817	39884
9.3	40777	40675	39317	35708	44869	42962	42629	38443	69131	63784	65254	60477	61037	61651	63670	58709	66829	70638	60215	56750	61769	75184	68324	65928	117506	113137	113053	103664	123571	116991	118641	106500	119091	115080	111135	104750	108198	109270	107438	94575	85099	84873	84271	77339	89530	89640	90564	79187	40188
9.38333	40931	40437	40052	35772	44725	43137	42265	38377	68581	63595	65218	60485	61634	61425	62545	57889	67031	69753	60671	55981	61926	76269	68160	66176	113809	110416	112394	102413	118354	114901	120162	107099	117721	112453	115014	107778	110204	106538	108578	94381	85332	84888	83869	77186	88949	90043	90540	79851	39832
9.46667	40827	40755	40301	35306	44791	43424	41905	38121	68751	63633	65102	61220	61374	61452	62716	58462	65888	70365	59968	57187	61472	76004	68196	66724	111318	112399	112455	102628	119957	115086	118355	108874	117249	113419	113996	107725	107533	109789	108023	94653	85593	84148	84686	76015	88528	89394	90611	80139	40383
9.55	41034	40217	39628	35874	44860	42965	42744	38213	68190	63842	65368	60279	60703	60947	63364	57960	66224	69883	60099	56793	61271	75436	68527	66736	114380	111368	114449	101949	118157	115519	122803	107908	118981	114688	113795	107321	109189	104942	109277	94433	85099	84524	84197	76956	89404	89393	90489	79553	39573
9.63333	40736	40266	40070	36152	44631	43325	42654	38539	68959	63870	65037	60719	61140	61067	62537	58752	65675	69803	59958	56465	61479	75398	68522	66513	116363	110388	113362	102754	119675	116975	121625	105874	117001	117168	112895	106371	110115	106380	108875	94935	85148	84166	84859	76946	88822	89831	90127	80270	40028
9.71667	40575	41256	40513	35754	44426	43282	43173	38602	68623	63383	64550	61053	60707	61159	63535	58457	65960	70186	59862	56972	61540	75357	68223	66016	114760	105746	112097	103369	119052	114797	121237	106673	118167	112606	112759	106997	107280	105931	108815	95271	84664	84569	84327	78128	88823	89299	90352	80104	40139
9.8	40709	40462	39824	36296	43985	43064	43399	37913	68550	62776	64123	61431	60541	61037	63163	57835	66465	69739	60006	56626	61039	75176	69249	66172	112784	111522	113794	102366	122060	114873	121536	106078	116495	114593	114469	108885	107744	107499	107908	94510	85212	84273	84208	77241	88700	89061	90713	79939	40592
9.88333	40343	40556	39999	36166	44493	43557	42674	38438	67760	63781	65151	60533	60901	60490	63425	58617	65944	70245	59777	56016	61092	75221	68269	66412	114139	110790	112797	102829	117819	115574	120855	104997	116026	112723	110925	105876	107376	108121	108849	94441	84847	84647	84341	77327	87853	89751	90060	79858	40584
9.96667	40538	39870	40429	36828	44197	43333	41849	38445	68669	63590	64704	61102	60517	61771	63641	58107	66518	69743	59662	55592	61033	74786	67555	66810	114883	109066	109220	103029	121282	118081	118352	108189	115277	114237	111246	104901	107853	105490	107966	94646	84538	84112	83852	77259	88779	89665	90731	80020	39904
10.05	40215	40605	39966	36791	44173	43287	42845	38424	68275	63719	65125	60452	60508	61827	63692	58130	66625	70301	58908	55969	60694	75504	68460	66371	114000	110190	112823	103029	119416	113310	116257	106959	114476	113587	111853	106198	106564	106810	107990	94405	85291	84408	84830	78050	88223	88723	89881	80594	39665
10.1333	40318	40759	39942	36180	44610	43203	42637	38555	67681	63542	64750	60018	59701	60709	63556	58032	65833	70199	59423	55678	60570	75633	68470	66685	112284	109329	112298	103179	117580	117945	119870	108457	117219	112499	113192	105503	107294	105998	109433	94459	84937	84266	84216	77184	88082	88396	89454	80885	39321
10.2167	40869	40407	40092	36598	44169	43349	43189	38169	68543	63614	64582	60875	60886	61094	62834	57522	65393	70120	58701	55322	60466	75240	68456	66200	113777	112043	110341	103260	121093	118326	120417	105776	116575	115727	111713	106582	106109	108075	110596	94968	84840	84422	84117	76999	88087	88997	89752	81129	40340
10.3	40300	40312	40753	36944	44641	43596	42752	39029	67470	63556	63672	60334	60484	60831	63156	58101	65421	70107	59175	55915	60342	75174	67673	66125	113413	109528	112774	102433	119320	115548	119597	105865	116364	112558	112524	106941	106360	107142	109869	94913	85138	84744	84072	77530	87257	88682	90016	81084	39618
10.3833	40652	40545	40595	36414	43893	42430	43661	38845	68020	62773	64039	61057	60427	60623	63581	57628	65267	69709	58791	55749	60605	75323	67823	66902	114289	109425	110128	103861	118044	115042	121230	109068	117183	112161	111675	107847	108603	106264	105962	94985	83531	84147	83499	78059	88261	88680	89652	80500	39674
10.4667	40559	40329	40233	36409	44090	42658	43372	39247	67929	63622	64414	60932	60630	60630	63104	58115	65912	70598	58936	55819	60052	74633	67714	66466	113780	109187	112564	102664	119058	111854	120652	105292	114535	111672	109266	106705	105286	106352	106274	94503	84062	84533	83852	76949	87663	88104	89833	80680	40271
10.55	40488	40213	40316	36626	44489	43635	43763	38794	68202	63713	64509	60401	60882	60860	63842	57451	65308	69399	59084	56200	60378	75398	68344	66608	112154	108847	111019	103495	118522	115422	120875	106583	118608	112744	111907	105292	107076	106989	109350	94145	83981	84222	83617	78238	87649	88733	89896	80294	39643
10.6333	40165	40162	40159	37366	44186	42797	43496	39142	67696	63378	64384	60761	60473	61045	63314	57827	65201	69242	58421	55940	59933	75648	67702	66936	111786	111766	110613	102346	118155	114570	119816	106432	113592	111618	111710	108467	106171	106708	107821	94173	83850	83895	83635	78086	87797	88903	89455	80546	39429
10.7167	40388	40427	40920	36928	43795	43290	43198	38730	67323	63130	63642	60879	60337	61079	63642	57755	64899	69564	58941	55405	59855	74504	68121	66522	112347	106601	110141	103122	117944	115258	124132	106273	114677	110872	108814	108287	107000	105495	107075	94888	83932	83406	83428	77646	87296	88455	90024	80649	39868
10.8	40008	40704	40880	36897	43951	43396	43395	39390	67771	62884	63869	60903	60499	60576	63184	57814	64665	69967	58912	54926	59588	74984	67614	66442	111773	107562	113150	102700	119668	115887	121748	105674	114078	113443	110192	106792	106562	106219	107207	94367	83951	84322	83503	77831	87645	88278	89578	81225	39969
10.8833	40083	40301	40966	36762	43606	43157	43559	39579	67739	62965	63439	60763	60331	61340	62385	57886	65069	69472	57983	54501	59572	75202	67892	66697	113361	110187	109978	103139	117632	113698	118741	107652	113814	113214	110176	106436	105432	105263	110232	94243	84249	83511	83419	78547	87107	87372	88959	81580	39879
10.9667	40139	40298	40643	37440	44123	43354	43096	39447	67592	62981	63334	60675	60341	61253	62154	57527	65018	68978	57928	54126	59308	75166	66913	67287	109557	108232	112911	102483	117721	113895	118373	106405	116932	113293	108384	106387	106655	106189	107605	94237	83746	84092	83775	77295	86885	88245	89553	80519	39796
11.05	39812	40429	41130	36861	43469	43162	42941	39460	67092	62521	63870	60770	60045	60667	63291	58009	64135	69034	58090	54399	59706	74545	67630	66703	111127	110099	111134	103352	116275	116026	114619	107582	112610	113622	109777	105415	105442	105211	106086	93600	82893	83379	83908	76923	87449	88251	88863	79830	40048
11.1333	39598	40535	40986	37392	44073	42952	43821	38949	67506	62550	63397	60551	60166	60848	63095	58407	64081	69417	57761	53838	59509	74945	67782	66436	112499	108477	110190	102802	115176	114426	119752	105697	117006	110978	108977	107039	105599	105143	110082	94107	83139	83909	83036	77098	86921	87297	88864	79898	39723
11.2167	40016	40412	40453	36723	44406	43038	43093	39139	67163	62721	64140	60764	60015	61483	62608	58063	63759	69184	57826	54225	59125	74331	68306	66184	113334	108186	110688	102061	113653	115040	119175	105515	114540	109465	108547	104817	106149	106635	106596	93987	82499	82935	82858	77625	86762	86768	90048	81515	39795
11.3	39778	40637	41117	36903	44221	43192	42484	39587	67155	62993	63057	60473	59632	60460	63187	58858	63780	68496	57799	54328	58676	74230	67887	66967	110835	109211	109590	101992	117215	111986	115156	105545	115711	112055	112118	108837	105303	105289	107733	94369	83227	83445	83181	77866	87258	87457	89075	81049	39476
11.3833	39169	40174	41060	37177	44460	43470	42915	39406	66853	63302	63679	60734	60046	61136	63016	57691	63318	68800	57445	53230	58595	74654	67245	65971	107762	107877	110281	102330	116538	110366	120168	105918	114458	111905	108375	105666	105489	105133	106917	95122	83025	83458	83125	77928	86724	87587	89122	79982	39796
11.4667	40082	40887	41206	37331	44231	43526	42800	38832	67446	62504	64573	60151	59892	61004	62671	57448	64026	69174	56898	53881	58255	73682	67844	66393	113108	106988	110609	102372	113490	114887	119271	107209	114036	113696	109220	107255	106076	104451	108326	93635	83898	83266	83276	77564	87035	87229	89476	81123	39895
11.55	39640	40049	41595	37799	44422	43198	43489	39108	67223	62575	63041	60491	59803	60023	63062	58289	64034	68909	57264	53649	58608	73979	67466	65770	110085	107873	110033	102538	114630	110729	117656	106968	114981	108932	109628	105787	105073	104764	106672	94831	82743	83787	83748	77336	86474	86912	88983	80085	39692
11.6333	39809	40442	41169	36948	44443	43003	43359	39668	66799	62598	63469	60674	60074	60544	62887	58375	64086	69477	56961	53590	59340	74389	67105	66246	111301	108404	109653	101673	118356	110809	119650	106510	115749	112352	107119	105638	104904	105560	106007	94575	83060	83622	82959	76929	86144	87197	88473	80677	39310
11.7167	39266	40504	40898	37376	44512	43204	43189	39921	67263	62243	63491	59833	59047	60442	61993	57875	64154	69103	57054	53785	58451	74732	67226	65960	108902	107801	110154	101722	114933	111928	118859	106499	113192	110693	108729	104744	104146	104677	108362	93910	82963	82815	82852	77580	86411	87135	88944	80457	39624
11.8	39459	40346	41193	37323	43816	43208	43152	39769	67112	63040	63180	60331	59404	60505	62750	57130	63970	68863	56485	53043	58697	74469	67670	66561	109326	108768	111044	102321	115830	113708	116660	104622	113274	110869	109077	106352	105242	104757	107982	93644	82002	83342	82996	77101	85539	87048	88928	79751	39488
11.8833	39418	40440	41145	37309	43884	43106	42726	40220	66826	62004	63146	59946	59905	61223	63285	57239	63554	68643	56073	53440	57752	73986	67356	65815	110599	108557	110828	101970	117441	113299	119483	103976	111170	112866	106415	104945	104047	104032	107835	93817	83127	82050	82616	77481	85777	85829	89184	80286	39544
11.9667	39405	40779	41193	37345	44078	43870	43135	39999	65858	62055	63485	60528	59749	60433	63457	57912	64011	68190	56283	54402	57273	73869	66898	66976	106251	106920	109258	101704	114787	113468	117141	105677	111174	112762	108897	105362	103782	105032	107355	94332	82915	82673	83631	77959	85832	86684	88665	80144	40130
12.05	39287	40800	41048	37577	43632	42975	43498	39684	65611	62185	62563	60444	59922	60398	63628	57627	63379	69027	55568	53932	57748	74174	66078	67146	107550	108571	109031	102084	114190	113030	118106	104835	112901	109799	107866	106338	104276	104546	105563	92869	82427	82436	83421	77357	85480	86590	88125	80634	40321
12.1333	39706	40947	41613	37713	44256	44035	42633	40041	66874	62194	61960	60468	59385	60422	62572	57871	63257	69077	55781	53142	58414	73261	67287	65839	109986	106681	110361	101267	113643	112535	116322	106138	111841	109064	108200	106235	103573	103979	107688	92553	82536	82389	83403	77291	85711	86718	88379	80226	39595
12.2167	39057	40163	41436	37898	44117	43831	43117	39964	67025	61470	62650	61070	59501	60259	63065	57413	63102	68715	55977	53363	57738	74246	66931	66184	109828	105346	110369	101446	114331	112796	114643	106256	111916	109747	107533	105789	103784	103378	106158	93730	82645	83400	82759	77294	85229	86826	88810	79614	39575
12.3	39507	40937	41474	37530	43835	44323	42843	39975	65832	61934	62964	60412	58954	60069	62961	58085	62632	68363	56192	53585	57450	74061	67126	66235	108321	105266	107663	101377	113419	112594	117281	104414	114955	111210	108931	104967	104151	103606	105220	92960	82119	81552	83357	76973	85445	87286	88047	80389	40027
12.3833	39204	41043	41715	37933	43652	43994	44044	39997	66297	61555	62499	60104	59507	59650	63293	57481	62307	68797	55200	53585	56925	73584	66902	66404	110340	108394	108786	100960	112005	112165	116144	106211	112094	107663	110003	105038	103222	104150	106010	92890	82359	81781	83129	77379	85198	86534	87629	80660	39847
12.4667	38869	40935	41454	37827	44499	43944	43608	39961	65880	61863	62571	60437	59483	60362	62905	57931	62456	68350	56221	53971	56637	73417	66989	66544	106982	105091	109881	101385	113147	111076	117351	104958	113422	111499	110386	105784	103243	103544	106292	92910	82297	82121	83027	77755	85259	86512	88416	79328	39803
12.55	38738	40751	41250	37833	44508	44340	43249	40027	65873	61158	62971	60470	59791	60626	63001	57557	62089	67436	55374	53199	57062	74090	66133	65882	108288	105740	107532	100985	111954	111160	119151	105253	109286	109218	108142	105906	103820	104598	103773	93764	81787	81837	82236	77608	85326	86562	87835	79909	39985
12.6333	39023	40757	41380	38109	43993	43635	43005	40508	65492	60918	62276	59678	59439	59727	63507	57756	61774	68503	55506	53214	56899	74069	66886	66035	107468	105999	109278	100573	114180	112732	115616	105402	108770	108946	107287	105519	103916	104096	106962	93255	81690	82066	82931	77073	85662	85451	87135	79976	39675
12.7167	39191	41333	41334	38236	44227	43081	43374	39943	65661	61212	62181	59644	59114	59312	62757	57534	62248	68351	55449	52819	57281	73716	67450	66107	108595	105950	109017	100152	109909	111484	119189	104674	111561	109274	105791	106102	102905	103553	106805	92670	81791	82018	82896	76569	85455	85571	87759	80397	39490
12.8	38608	40707	41856	37711	43603	44040	43682	40281	65708	61133	62217	60081	59172	59378	62471	58543	62329	68287	54696	53482	56578	73667	67031	65626	105323	104913	108774	100302	111095	110938	115116	105440	111427	109827	108138	105108	103082	102905	106026	92208	81282	81701	82374	77006	84780	86167	87698	79978	39327
12.8833	38512	40789	41364	37443	43799	43732	43571	40232	65664	62328	62162	60877	58906	60038	62990	58096	61836	67716	55063	52673	55999	74116	66838	65284	109785	106909	109343	100927	112487	112742	114048	104824	111757	108596	111728	105588	103059	102756	104648	92146	81635	82179	82246	76854	84791	85738	87562	80126	39600
12.9667	38831	41082	41622	37341	43882	43348	43316	39937	64386	61667	61466	60272	58763	59735	63675	58554	62207	68273	55265	52856	55997	73853	66330	65798	107154	106860	107284	100022	113205	108178	115006	104386	109283	109832	108761	104746	102284	102645	106276	93120	81154	82424	81995	76866	84386	85058	88048	80405	39895
13.05	38370	40866	41647	37639	43494	43161	43208	39743	65034	61906	61913	59974	59445	59918	63196	57889	61471	68209	54564	53249	56511	73453	66487	66169	108139	107060	108521	100408	113320	109739	118835	105116	111251	109121	105366	105532	102387	102769	105229	92618	81587	81139	81953	76750	84859	85516	87746	79638	38710
13.1333	38735	41010	41570	37498	43650	43690	43634	40697	64949	62322	61718	60080	58456	59373	63198	57682	61339	67301	53654	52939	55875	72732	65930	65840	108531	106379	108941	100320	109856	112323	113052	104035	108914	106988	106929	105426	102897	102496	105137	93165	81389	82127	82069	77015	83437	85423	87384	79676	39729
13.2167	38712	41193	41337	37869	43681	44004	43731	40327									61789	67986	54916	52744	55572	72846	66237	65764	106173	106290	108412	99449	112303	111487	114393	104465	111003	107480	106919	104460	102104	102515	104491	93137	81647	82089	82392	76782	83597	85357	87070	79517	39240
13.3	38354	41165	41462	38432	44168	43520	43988	39935									61038	68399	54160	52001	55485	73079	65818	65457	108075	105574	106482	101140	113601	110012	115621	104762	111684	106830	110615	104132	102786	101683	105391	92248	80874	81450	82132	76840	83981	85219	87833	79823	39111
13.3833	38751	40522	41630	37259	44232	43464	43372	40302									61469	66994	54106	52364	56071	73118	65535	65553	106419	106144	105798	100376	110476	109231	115004	105724	108754	108283	106566	104897	102076	101311	105411	92435	80364	81532	81677	76423	83967	85437	87338	80111	38925
13.4667	38664	40992	40975	37745	44270	43443	43275	40118									61484	67600	53136	51763	54928	72920	66706	65127	107770	104951	108444	100112	110625	112254	117015	104343	111125	107762	104905	104999	101545	102022	106049	91150	81127	81804	81655	76660	83701	84294	86224	79816	39482
13.55	38472	40733	41248	37892	43764	43824	43574	40707									61297	66929	53439	52381	55126	73690	66390	65666	106821	106577	109707	99281	110454	110272	113356	104921	110342	108851	105315	104101	102216	100924	106087	91306	80776	82449	80984	76408	83376	85095	87036	78776	39703
13.6333	37811	41235	41463	37536	43420	43778	43639	40158									60907	67378	52865	51913	55366	73427	65883	65609	105388	104776	109284	99393	111589	109985	117482	104072	110119	105941	106022	104260	101986	100705	104691	92041	80445	81154	81714	76732	83674	83844	86918	79675	39358
13.7167	38388	40961	41345	37726	44000	43722	43625	40244									61665	67165	52390	51939	54518	72532	66223	66078	107038	105005	107861	99876	110211	107288	114670	103738	109020	108436	106273	104083	102045	101113	105706	91680	80066	81481	81070	77208	82623	84557	86403	79539	39720
13.8	37972	41271	41727	37863	43845	43554	44056	40603									60804	67414	53224	52014	54414	73148	66389	65278	107568	106455	107430	99819	110156	109320	110895	103599	110991	106416	106030	104569	101372	101306	105374	91873	81040	81365	81942	76519	83564	84952	86663	78974	38693
13.8833	38240	40753	41583	37773	43562	43782	43772	40803									60911	67099	53522	52552	55101	72607	66027	65948	106671	104656	106075	100167	111768	108230	118236	103893	110877	107266	105460	104383	100884	100860	104916	92266	79816	81587	81206	77167	82602	84048	86350	79108	39407
13.9667	37891	40998	41368	37757	43322	43353	43431	40915									61407	67200	52356	51701	54857	73305	65955	65568	106307	104632	105123	99731	109907	107257	113208	103619	108920	106426	106722	103522	100588	101023	104195	92044	80504	81557	82125	76749	83279	84174	87153	79277	38752
14.05	38293	41460	41614	37889	43395	43208	44058	40757									60910	66699	52248	51456	54973	72476	64675	64691	104887	104436	108135	99160	112053	106209	113372	104002	109897	106775	106437	104353	100299	101124	104032	91536	79919	80486	81285	75937	83318	84386	86884	79098	39340
14.1333	38703	40517	41803	37791	43366	43838	44141	40953									60738	67991	52247	51468	54291	72279	65343	65604	106397	105094	105654	98982	109557	107282	112276	102911	107328	105214	106998	103819	100725	101012	104376	91835	80054	80954	81587	76603	82473	84554	86617	79213	39080
14.2167	38266	40799	41801	37755	43585	43901	43635	41247									60298	67104	52657	51277	53828	73056	65477	65034	106485	104582	107674	98931	108379	109142	111128	102901									79507	80574	81154	76378	82570	84664	85805	78500	39197
14.3	38224	40954	41957	37970	43781	43285	43183	40550									60962	66947	51773	52353	53615	73581	66428	65619	105412	103886	107198	98886	111650	109813	114758	102905									79333	80996	80979	75997	82260	83995	86107	78583	39431
14.3833	38041	41254	41993	38357	43454	43737	43856	40635									60859	66757	52628	51687	54089	73307	65118	65014	105295	103846	106475	98659	110985	106925	112439	102989									79505	80348	80871	75880	82731	84404	85568	79369	38902
14.4667	38198	41029	42019	37927	43726	44120	44092	40690									60819	66299	52098	51717	54510	72201	65924	64886	104999	104099	105581	99269	109252	107165	113603	102996									79452	81288	80912	76778	82237	83506	86585	78786	38403
14.55	38689	40936	42259	37390	43363	44023	43910	40960									61050	65913	51819	51606	53959	72412	65595	65426	104931	103801	105449	99006	108259	107222	112275	102291									79103	80470	81296	76398	81780	84488	85893	79043	38265
14.6333	38229	40123	42118	37909	43761	43606	43680	40548									60569	67200	51664	50968	53467	72359	65808	64733	104660	103873	106005	98924	107634	105008	110454	102336									80282	80498	80497	75192	81894	83381	85544	78720	38291
14.7167	38423	40871	42171	37701	43832	43589	43871	40978									59620	66453	51352	51160	53541	72309	65351	64957	104624	102983	108664	98361	111707	107180	113494	102741									79529	80932	80335	75584	81829	83689	85079	78551	39174
14.8	38676	40969	41626	38366	43956	44183	43467	40493									60774	66162	51273	50839	53187	72577	65175	65319	104344	103806	106654	98360	109669	104940	112842	101777									78408	81111	81130	76045	82047	83385	85521	78489	38653
14.8833	38078	40627	41997	37848	43587	43881	44102	40415									59232	66278	51646	50447	53072	71794	65117	64683	105199	102664	106801	98395	108884	106941	111294	102091									79389	80666	80463	76441	81789	83455	86429	78462	38649
14.9667	38178	40620	41855	37916	43307	43834	43618	40789									60169	66618	50556	50297	53072	72494	65402	64390	103916	103329	106316	97683	109942	106975	110513	101920									79188	80043	80550	75982	81590	82603	85071	78052	38913
15.05	38623	40479	42694	38267	43859	43584	43841	40147									59668	66939	50679	50625	52835	71758	64752	64527	104538	103182	105411	98364	109455	106365	112657	101302									78307	79439	80483	76414	81942	83022	84704	78516	38739
15.1333	38741	40745	42363	38351	43843	43027	43694	40675									59893	66689	50338	50208	53329	72894	64830	65139	103653	103253	105313	98567	105647	106799	114553	101749									78626	79647	80564	75696	82011	83035	85202	77999	38422
15.2167	39101	40715	41741	38137	43414	43721	43710	40670									59840	66677	50184	50318	53128	71554	64735	64589	103892	102250	106650	96599	108684	105345	111830	100970									78588	79676	80157	75929	81891	82798	85992	78433	38823
15.3	38710	40556	41827	37766	43644	43188	44080	40658									59528	66331	50851	50243	53134	72058	64788	64807	103471	103253	104743	97757	111252	105582	112247	102274									79032	80313	80423	75176	81433	82379	84267	77698	38372
15.3833	38704	40603	42455	37810	43377	43110	44229	40618									59038	66359	50636	50241	52357	72376	64735	64689	103172	102913	105425	97509	107802	106917	110989	101382									78515	79765	80274	75318	80888	83441	85121	78042
15.4667	39189	41175	41885	37472	43217	43219	44501	40578									58728	65813	49874	49860	52132	71005	64970	64694	103422	102434	105198	97085	106910	107235	115110	101541									77872	79255	79780	75153	80889	81728	84860	78156
15.55	39237	40618	42197	38252	43230	43942	44518	40686									58816	65986	50108	50224	52533	72603	65286	64766	103262	103028	104368	97176	107991	106097	110716	101418									78271	79749	80376	74382	81368	82709	84198	78200
15.6333	39007	41540	42002	38494	43249	43664	43688	40975									59725	65741	50425	49960	52168	71624	64151	65283	103097	102640	104731	96800	106827	105923	109721	101064									78088	79487	80263	75402	80645	82288	84224	77965
15.7167	39283	40879	42106	37505	43413	44151	43332	40943									59151	66532	49711	49722	51734	71508	64236	64588	102732	101691	104543	98055	105895	105292	110901	100321									77921	79730	80391	75814	80698	81858	84781	77539
15.8	39173	41209	41915	38199	43232	44099	43989	40289									59199	65495	49918	49964	51961	71609	64276	64603	102785	102117	105175	97543	107582	106186	112250	101678									77917	79911	80490	74613	80864	82297	84083	77703
15.8833	39527	40764	42098	38358	43546	43325	43717	40734									58788	66255	48894	49244	51411	71706	64292	64582	103275	101400	104992	96265	105417	105099	110677	100451									77847	79347	80332	74845	80288	82223	84646	77845
15.9667	39038	40879	42303	38471	43442	43851	44210	40680									58946	65308	49404	49302	51715	71543	64825	63708	102308	101539	104546	96463	105511	104697	107870	100959									78117	79204	79966	75395	80324	81664	84004	77650
16.05	39206	40808	42199	38675	43523	43555	43426	41271									58977	65433	49745	49124	51269	71461	64708	64105	102447	102010	104755	97110	106584	104801	109559	100538									77765	79020	79882	74681	79797	81749	84390	76789
16.1333	39461	40847	42325	37784	43183	44302	43764	40763									57971	65705	48824	49033	50779	71319	64539	63550	101905	101279	104440	96999	108334	105126	111578	100209									78516	79893	79001	75368	79937	82488	84648	76937
16.2167	39715	40825	41677	38495	43054	43507	43712	40970									58540	65486	49141	48429	51555	71803	64269	64590	102889	101100	105068	96870	106546	105407	109908	100915									77999	78704	79755	74789	80386	81436	84341	77233
16.3	39046	40913	41697	38072	43097	43584	43714	41207									57214	65338	49091	49213	51532	70563	63397	63761	101960	101421	104829	96491	105702	104151	105344	99687									77438	78990	79216	75019	80069	81067	83648	77454
16.3833	39378	40754	42249	38959	43676	43367	43563	41474									57978	66336	49037	48693	50936	71173	64002	64236	102286	99885	104337	96170	105562	105113	110162	100230									78291	78932	79229	75159	79584	80519	83738	77717
16.4667	39785	40943	42775	38725	43098	43996	44666	41059									57776	65903	48654	49323	50230	71553	63821	64470	101424	101201	103354	96198	106242	105058	109490	99628									77496	79079	79245	74813	79955	81837	83636	77235
16.55	39215	40838	42252	38008	42989	44145	43664	40466									58025	65793	48324	49114	50428	70703	64735	63218	101180	100859	103493	95948	105321	104861	109408	99724									76710	78339	79944	73944	79891	81619	83868	76566
16.6333	39356	40767	42475	38419	43437	44012	44189	40870									57831	66031	48580	48525	50632	71347	64356	63990	101095	100581	104290	95286	104660	104024	108958	99879									76956	78587	78784	74678	80502	80261	83318	76771
16.7167	39593	40941	42654	38712	43284	43744	44095	41322									56788	66164	47979	48021	50486	71549	63799	63770	101398	100513	103857	95516	105749	104378	109501	99445									76863	78763	79719	74950	79867	81456	83229	76634
16.8	39106	41240	42473	38769	43541	43957	43631	40645									56663	66387	47599	47845	50714	70331	64117	63178	102275	100510	102598	95748	104769	103888	110123	99284									77153	77652	79383	75560	79313	80925	82457	76761
16.8833	39769	40967	41930	38687	43115	43815	44401	41079									57602	65027	47861	48204	49980	70974	63567	63932	101940	100226	103231	95186	105469	104625	109115	99257									77205	78553	78817	74062	79469	81286	83920	77065
16.9667	39599	41661	42366	39059	43362	43771	44121	40685									56838	65745	47143	48040	50428	70840	63276	63352	100788	99935	102487	95193	104779	104240	107165	98508									77248	78732	79211	75262	78814	80970	82504	76737
17.05	39806	41317	42656	38633	43699	44339	44432	40900									56970	65835	47450	47817	50409	70276	63275	63209	100265	99928	103263	95124	105092	103222	109107	99193									76111	78216	78810	74311	78955	81136	83132	76637
17.1333	39453	41003	42060	38698	43424	43865	44253	40506									57173	64494	47386	47336	49625	71043	63385	64032	99749	100168	102476	95020	104829	103841	107536	98815									77206	77749	78873	75057	78513	80152	82846	76834
17.2167	39575	41440	42144	38574	42545	44115	44034	40873									56363	65596	47115	46943	49456	70219	62520	63452	100757	99603	102224	95091	103642	104010	105928	99132									76396	78056	78338	74465	79524	80650	82995	75991
17.3	39314	41639	42721	38927	42682	43756	44152	40364									57423	64548	47276	47117	49914	70721	64130	63802	99537	99767	102952	95151	104114	104437	106883	98164									76616	78283	78063	74649	79272	79907	82184	76289
17.3833	39767	41383	41952	38522	43290	43654	44259	40361									57063	64916	46953	47243	49897	70755	63267	63417	99865	99538	101849	95030	104839	102541	107360	97774									76312	77414	78596	74288	78720	80172	82629	76596
17.4667	39760	41060	42677	38122	43251	43053	44264	40878									56957	64707	46898	47143	49572	70957	62972	63099	100753	99470	102796	94803	103581	102692	106474	97692									75958	77244	78175	74059	78495	80105	82652	76478
17.55	39418	40751	42173	38757	43092	43542	44402	40952									56814	64507	47445	46929	49333	70509	63107	62171	99933	99357	102401	95182	103999	102824	107146	98468									75893	77497	79365	73912	78699	80533	82413	76246
17.6333	39758	41450	42141	38341	42796	43656	44252	40665									56935	64827	46692	46954	49296	70698	63239	62854	99971	98719	103622	94734	103355	103155	107171	97756									76286	77981	78257	73939	79019	79728	81927	76391
17.7167	39227	41512	42311	38467	42945	43265	44033	40673									56361	64333	46265	46550	48270	70566	63377	63394	99273	98919	101403	94398	103575	103740	105057	97497									75925	77272	77445	73609	77877	80095	82413	76248
17.8	40405	41728	42389	38569	42649	43809	44405	41156									56754	65111	46409	46410	48702	70243	64027	63357	99362	97821	101670	94305	103768	102605	107870	97745
17.8833	40024	41715	42288	38378	43055	42827	44093	40642									57359	64586	46370	45959	48982	70298	63202	62634	98856	98766	101319	94394	103392	102914	108012	97019
17.9667	39505	41509	42351	38682	42592	42999	43732	40345									56083	64354	46181	46783	48397	69949	63359	63516	98792	98711	102229	94013	102657	101940	107161	96675
18.05	39180	41368	42361	38456	43398	43070	44202	40823									55983	64280	45679	46213	47998	69957	62631	62676	99618	98547	101126	93841	103451	102242	104849	97348
18.1333	39672	41869	41867	38793	42647	43437	43849	40907									56381	64470	46695	46218	48391	70279	62492	62866	98813	98466	102186	94360	103291	102064	106236	97023
18.2167	39437	41418	42778	38036	43513	43451	44232	40530									55852	64797	45829	46396	48646	70350	62400	62589	97707	97935	101665	93755	101755	102264	107762	97163
18.3	39631	41826	42892	38465	42749	43715	44143	40410									56101	63956	45421	45748	48091	70589	62355	62462	97901	97742	100931	93569	102284	101794	106596	95935
18.3833	39812	41801	42557	38067	42610	43125	43437	40740									55893	63442	45141	46120	48501	70241	62369	62212	97591	97710	100549	93762	102626	102092	105644	96400
18.4667	39776	41858	42529	38350	42253	43650	43363	40868									55361	63795	45482	45666	48005	69575	62849	61631	97789	97965	100586	94173	101665	100795	106408	96971
18.55	39550	41880	42689	37989	42382	42963	43577	40716									55944	63615	45287	44901	48111	69298	62397	62072	98279	97519	100703	93118	102600	101266	106664	96502
18.6333	39442	41755	43111	37843	43010	43348	43882	40219									55819	63769	44974	45080	47808	69757	62842	62224	97266	97406	100457	93789	101344	101045	105850	95758
18.7167	39452	42284	42512	37662	42498	43184	43868	40389									55409	64199	45001	45493	47563	69785	62985	62651	97984	97049	100729	93353	102270	100669	105055	95564
18.8	39380	41751	42202	38297	42921	43499	43822	40804									55235	63689	44853	45168	46971	70269	63163	62444	97966	97425	100335	93205	102016	101350	106301	95863
18.8833	39363	42540	42342	38133	42842	42955	44188	40438									55360	64012	45275	44765	47436	69739	62402	61980	97476	97045	100405	93115	101113	100654	105452	95564
18.9667	39820	42960	42569	37899	42267	43538	43856	40788									55509	63770	44601	45232	47047	68923	62628	62333	97021	96977	99699	93510	101226	100852	107610	95601
19.05	39062	42582	42343	38120	42427	43708	43159	40498									55925	63395	44535	44587	47070	69322	62710	62030	96581	96631	99720	92920	100374	100840	105302	95806
19.1333	39177	42760	42418	38289	42022	43820	43513	41099									56433	63269	44340	45029	47155	69353	62460	62054	97566	96306	99637	92381	101720	101012	104289	95866
19.2167	39717	42589	42389	38104	42733	42989	44042	40894																	96450	96845	99544	92688	100259	99974	104652	95443
19.3	39265	42403	42189	38227	42667	42764	43644	41050																	96579	95330	99710	92203	100305	99617	105005	95624
19.3833	39007	42943	42878	38702	42485	42726	43319	40599																	97465	96688	99457	92710	100628	99255	104285	95111
19.4667	38432	42319	43089	38154	42639	42849	43622	41366																	96220	95995	99171	92193	99108	99249	103187	94826
19.55	38723	42688	42660	38444	42610	42562	43415	40589																	96514	95371	99935	91997	99505	99951	105217	94944
19.6333	39022	42862	42419	38813	41895	43109	43358	41137																	95196	96019	99041	92583	99385	99117	104331	94478
19.7167	38937	42610	42195	38128	42430	43098	43656	40727																	95858	95730	98617	92079	99279	99537	104064	94769
19.8	38498	42614	42547	38443	42521	42886	43527	40673																	96467	96594	98846	91606	98608	98905	104040	95210
19.8833	38967	42834	42746	38612	42052	43058	43687	41137																	95661	94835	98907	91846	99619	98643	103225	94203
19.9667	39386	42665	42608	38128	42531	42925	43038	40547																	95711	95930	98343	90774	99536	99725	103077	94102
20.05	38877	42674	42346	38362	42584	43061	44091	40558																	95380	95334	98167	91306	98221	98877	103471	93959
20.1333	38929	42317	42687	38836	42365	42904	44309	40965																	95379	95222	98409	91346	98149	98625	102851	92663
20.2167	39402	42530	42466	38831	41840	42711	44543	40599																	94708	95428	98463	91320	97834	98574	104136	94094
20.3	39024	42378	42593	38230	42461	42829	44282	40622																	95008	94576	97800	91096	97417	97710	103557	93250
20.3833	38699	42258	42498	38474	42195	43036	44389	40360																	94957	95187	98357	91077	98804	97891	104395	93309
20.4667	38734	42598	42681	38328	42792	42518	44225	40876																	94260	93478	98182	90933	98373	97564	103411	92742
20.55	38964	42938	42578	38213	42347	42871	44283	40904																	94356	94998	97989	90599	98602	97482	102900	93416
20.6333	38828	42849	42772	38060	42410	42602	44369	41218																	94217	94471	97930	90260	97164	97407	102251	92745
20.7167	38967	42723	42543	38067	42054	42439	44051	41016																	94972	95225	97960	90289	97565	96783	102118	92999
20.8	38809	42481	42647	38246	42356	42412	44254	41263																	93674	94507	98571	90630	96972	96867	102769	93354
20.8833	38929	42596	42495	38232	42329	42838	43782	40683																	94093	94518	97103	90334	97436	97021	102020	92985
20.9667	38969	42912	42615	38510	42482	42888	43790	40820																	93636	94126	96827	89772	96196	97208	101909	92284
21.05	39075	42311	42107	38457	42110	42344	43914	41060																	94284	94169	97728	89936	96326	96414	101437	92612
21.1333	38900	42084	42511	37962	41764	42643	42540	40811																	93372	93419	97396	89811	96744	96106	102560	92391
21.2167	38404	41995	43018	37671	41769	42693	43397	40514																	94097	93378	96628	89614	96488	96640	101117	91656
21.3	38586	42110	42186	37869	42084	42367	43701	40698																	93026	93660	96605	89738	96576	96393	101424	91700
21.3833	38113	42455	42625	38233	41819	42120	43545	40547																	93151	93307	97355	88963	96041	96030	101720	91520
21.4667	38741	42278	42620	38732	42541	42728	43781	41005																	93104	93055	95999	89163	96507	95977	101226	91681
21.55	38514	42736	42260	38198	42355	42735	43642	40942																	93259	93202	96673	89205	96395	95739	101219	90861
21.6333	38764	42366	42485	38421	42051	42573	43646	41213																	92466	93325	96600	89359	95747	96137	101204	91542
21.7167	38638	41864	42422	38518	41975	42660	43437	41015																	92541	93266	97558	89030	95989	96193	101246	90949
21.8	38407	42857	42857	38298	41553	42507	43829	40777																	92043	92171	96178	89366	95300	95429	101099	91078
21.8833	38815	42525	42817	38477	41701	42621	43316	39752																	92160	93496	95758	89422	95550	96105	101183	90684
21.9667	38348	42929	41973	38213	41891	42325	44073	40933																	92426	91864	95123	88987	94785	95152	100750	90697
22.05	38701	42542	42378	38253	42211	42257	43186	40595																	91680	92530	96154	88786	94532	95881	99714	90581
22.1333	38415	42714	42744	38168	41719	42826	43354	40526																	92313	92096	95992	88812	94524	94989	100689	90244
22.2167	38676	41870	41909	38290	41532	42593	43805	40578																	91649	92644	94666	89370	94607	94881	100156	90539
22.3	37759	42205	42548	38015	41438	42368	43631	40322																	91194	91637	95871	88413	95075	94879	99750	90363
22.3833	37608	42691	42969	38251	41646	43338	44081	40722																	91932	91956	95741	89035	94298	95224	101051	90247
22.4667	38365	42226	42713	38530	41232	42957	44029	40335																	91458	92547	95133	88396	94396	94637	99927	90219
22.55	38142	42806	42928	38506	42111	42257	43609	41024																	91996	91660	95340	88231	93618	94374	100306	90100
22.6333	38283	42886	42116	39048	41583	42832	44274	40589																	91433	92246	94929	88165	94661	93654	99613	89728
22.7167	38070	42288	42990	38298	41533	42562	43779	40600
22.8	37786	42550	42887	38989	41479	42636	44578	40862
22.8833	37982	42148	42590	38471	41180	42179	44471	40754
22.9667	37909	42260	42890	38198	41360	42469	44174	41121
23.05	38033	42703	43117	38690	41369	42814	44495	40719
23.1333	38125	42415	42343	38466	41267	41951	44621	40667
23.2167	37966	41492	42301	38527	41650	42491	44449	40783
23.3	38041	42194	42450	38777	40922	42466	43683	40786
23.3833	37554	42625	41964	38036	41570	41605	44543	40324
23.4667	37949	42368	42683	39030	41328	41905	44491	40920
23.55	38129	42199	43239	38854	41542	42440	43843	40442
23.6333	37586	42535	42639	38833	41606	42438	43494	40303
23.7167	37518	42668	42991	39144	41681	42221	44252	40410
23.8	37389	42000	42867	39424	41185	42835	43546	40204
23.8833	37584	42455	42733	38527	41647	42289	43948	40376
23.9667	37857	42120	42658	38933	40977	42333	43193	40314
24.05	38177	42304	43126	38737	41916	42278	43224	40190
24.1333	38037	42315	42739	39415	41911	42670	43088	40029
24.2167	38185	42385	42485	38828	40975	41963	43161	40550
24.3	38421	42346	42394	38464	41443	42323	43221	40005
24.3833	37922	42696	43156	38988	41275	42249	43296	39926
24.4667	38123	42206	42527	38975	40752	42057	43008	40237
24.55	38040	42685	42543	38773	41795	42252	42908	40544
24.6333	37622	42030	42140	38530	41435	41842	43074	39506
24.7167	37617	41592	42316	38601	41383	42090	43271	40156
24.8	38254	41584	42713	38644	41288	42189	43309	40033
24.8833	38156	42237	43024	39280	41349	42131	43044	40709
24.9667	37677	42299	42605	38949	40861	41824	42923	39992
25.05	38061	42421	42265	38675	41420	41501	43359	40306
25.1333	38361	41935	42925	38578	41582	41461	43495	40042
[truncated: 131 more columns]
