# Supplementary material for: Rate-limiting transport of positively charged arginine residues through the Sec-machinery is integral to the mechanism of protein secretion
Source: eLife. 2022 Apr 29;11:e77586. doi: 10.7554/eLife.77586 (PMC9110029; doi:10.7554/eLife.77586)
Supplement: Figure 6—source data 1. [file elife-77586-fig6-data1.xlsx]

## Sheet: Sheet1
	HB1	HB1	HB1	HB1	HB1	HB1	HB1	HB1	HB1	HB1	HB1	HB1	HB1	HB1	HB1	HB1	BL21	BL21	BL21	BL21	BL21	BL21	BL21	BL21	BL21	BL21	BL21	BL21	BL21	BL21	BL21	BL21	HB1	HB1	HB1	HB1	HB1	HB1	HB1	HB1	BL21	BL21	BL21	BL21	BL21	BL21	BL21	BL21	PLs
time from injection (min)	DMSO	nigericin	valinomycin	both	DMSO	nigericin	valinomycin	both	DMSO	nigericin	valinomycin	both	DMSO	nigericin	valinomycin	both	DMSO	nigericin	valinomycin	both	DMSO	nigericin	valinomycin	both	DMSO	nigericin	valinomycin	both	DMSO	nigericin	valinomycin	both	DMSO	nigericin	valinomycin	both	DMSO	nigericin	valinomycin	both	DMSO	nigericin	valinomycin	both	DMSO	nigericin	valinomycin	both	–
-8.1	483640	493056	493320	500285	520004	528176	516985	516450	813415	855716	843352	841862	873413	874433	856653	853461	224778	224776	222581	223092	226222	231490	223839	218279	109986	109161	112468	112764	112174	113382	113926	111810	368924	379794	377905	388270	392466	400720	397480	403873	163129	166889	165841	172006	173816	172629	174927	175442	6293
-8.01667	492560	495744	492866	494931	520857	529705	513082	522527	817827	860686	841644	847289	873236	874921	862349	865651	225026	222854	223344	221530	223628	226503	222502	218270	107376	112505	111280	113256	113602	114435	112685	113374	371786	381295	373636	389545	394678	405781	402962	397245	163452	167888	171260	172520	175958	170934	171096	172506	6966
-7.93333	498998	505432	499010	502806	521466	530675	523573	533664	823397	865659	843454	851614	875857	873159	860343	868859	225937	223449	230714	223563	227026	225053	222484	222014	109365	112825	110525	114128	115669	112868	114267	114830	377162	386367	378147	398721	400149	404795	401159	396004	164959	168485	168385	173111	171172	172803	175271	176344	7858
-7.85	501767	504654	503657	504213	527379	534434	531208	531446	820843	861259	854700	856639	879912	889312	867170	863806	229182	224638	228531	222946	227641	230868	221584	220945	108603	114009	111074	115505	115656	114017	113241	114882	377340	386726	384216	399199	401806	407775	404487	404337	166125	168272	167898	176496	176677	175281	174280	175799	8439.5
-7.76667	499363	511027	506054	504997	535172	542911	533093	531200	829605	871558	856645	855032	887709	886456	870406	877699	227110	227253	228062	224175	230528	227618	224156	224669	111451	114446	110927	112750	114662	117566	111743	116508	381439	392821	388358	398778	402058	411323	407985	410365	171422	168862	172874	176287	177441	172404	178490	174885	9055
-7.68333	508455	515459	502494	510373	536943	539261	536153	544662	839015	876649	859619	861100	879579	885865	869826	874791	228264	231944	223832	226497	228698	227569	224414	225802	109604	113195	112836	115340	115355	116101	113922	114460	385436	397809	392841	401967	404783	410092	407390	409065	168696	173858	171865	176524	173499	170628	176576	177891	9399
-7.6	509719	516214	507573	516672	539499	546123	533235	536285	827612	880043	864144	863410	893262	891741	871833	875275	228780	224934	229614	224244	228690	233039	222209	229117	109448	116077	110713	114202	113047	112622	115609	114433	394971	396759	385794	403425	407145	411394	405895	409803	168533	170389	171093	175513	174376	173937	177822	176056	10109
-7.51667	515646	523070	511066	520508	540014	546103	536093	533743	829283	875323	862223	865565	897578	893648	881169	882921	230527	230076	226979	225865	226670	230570	227925	227959	108691	114602	113191	114458	116365	113339	114454	113541	392894	402486	393007	400120	406720	416637	415906	410421	171672	172960	169054	177950	177072	172495	176833	177446	10657
-7.43333	522434	522050	510805	523386	545619	546252	541010	538775	843853	885901	869839	873552	894372	896494	878021	888112	226757	228167	230439	229726	229312	229396	227847	223664	113374	114960	115925	114586	114500	118295	116644	116780	390678	401672	396239	411488	412810	413916	410628	414009	169200	172255	175470	174840	180090	173999	179471	180696	11100.5
-7.35	518782	526257	514851	517933	542009	556743	543394	549737	848109	885669	867861	870653	899140	891895	879428	884242	232248	227321	230660	224091	231280	232319	231071	228089	108136	115228	114614	117142	114891	115176	115071	113821	395279	402547	395084	407003	411691	429888	414295	418813	171597	171188	172841	172421	176635	171224	178852	174650	11589
-7.26667	529827	523090	518121	519975	551709	551997	545697	543542	847831	885486	875566	869363	904000	900368	889328	891804	237565	230210	228041	223590	231170	232701	227175	225136	110828	115731	111942	114336	117856	115731	113037	117313	388475	404924	396404	417002	410565	421213	412811	414674	176006	169906	170812	176430	176510	175570	174117	180165	12405.5
-7.18333	532472	535010	525497	524366	556577	557402	549454	547495	847139	887058	875775	873143	907990	900057	885082	883993	235302	230938	231307	225539	232088	230278	229906	226671	111293	116249	114121	118057	117850	117748	117956	114338	394549	401340	397123	414294	414253	423297	419748	418505	172523	170816	171747	176059	175568	178045	177856	177772	12660.5
-7.1	533949	526411	527367	532897	559929	549157	543602	545638	850135	893087	879961	883762	908239	908627	882287	890900	234131	233387	230773	224679	230817	229923	227459	222040	113025	116104	113856	116671	119692	117712	116392	116176	401256	411827	403868	420987	413556	426053	411998	421164	169785	173944	175206	177742	179169	174401	182839	178709	13107.5
-7.01667	535096	534465	529671	526581	554980	557750	550113	546632	864842	902279	878885	878639	903557	907005	885129	900165	234533	235073	232259	223920	230041	232959	228302	226399	112339	114456	114533	117251	118825	117981	116707	114838	403841	414420	402758	413307	422393	427525	422943	422028	174058	173544	176542	177697	178589	176619	177341	174445	13548
-6.93333	537398	537831	531421	528587	558593	557626	555554	552661	862484	893972	882276	882954	911345	906363	885416	895941	234074	232245	233535	225283	234356	233754	228042	226547	114214	115628	114344	114412	117157	116823	115915	116124	406962	408466	400383	416543	423682	430052	422375	422447	174076	174473	173312	177764	180523	179317	176747	178344	14007
-6.85	540680	540354	539785	534860	565929	570817	552922	549034	859293	906954	880451	882360	910529	914288	885165	894312	233212	236203	233009	223353	234245	232572	226636	224809	112225	116203	114735	119477	121539	117268	117265	114351	406623	416174	407054	423813	421802	432316	421209	415599	175917	175245	175203	175592	179508	175990	181077	180253	14082.5
-6.76667	541383	540262	536215	540201	564039	567649	554454	555204	859852	909382	885138	883180	909832	916683	889361	897644	235354	233317	228143	223355	234511	231887	227988	229455	113446	119821	116378	118378	117754	117031	115632	114142	404714	415740	408024	418963	421481	424073	424185	419591	172722	175259	174742	181279	179013	178951	181517	178242	14527.5
-6.68333	548340	547087	534875	534774	567157	576981	559653	556163	866376	899369	884412	884398	915556	921743	891907	900754	233795	236229	231978	227833	231544	234980	230665	228955	115757	116395	112228	119251	120173	116211	116178	117359	408761	424238	408725	427886	424297	430476	421322	423476	173010	174942	179946	176932	180899	177889	181263	176776	14921.5
-6.6	553633	542934	540837	535617	573474	574640	559610	555322	880307	907854	892776	884806	915547	913734	894791	904533	235791	237523	228730	226080	231339	237698	229390	229334	114745	119062	117009	116660	117930	118797	114804	115648	411212	421326	412391	422542	427464	436370	428810	424688	178021	177925	177823	178432	181927	178964	178387	180903	15220.5
-6.51667	554664	548936	540310	543893	577710	573059	561949	562648	874144	903609	889943	896241	926397	922948	899834	907754	235811	234812	233627	224421	234320	233534	227958	225369	114690	118281	116056	117150	122230	117030	116506	123755	410557	421544	414429	420915	426001	434746	427187	424110	174721	178066	178381	180205	182735	177087	179417	176551	15693.5
-6.43333	550663	547287	546753	542094	574242	581026	568014	557867	875745	908975	898467	890268	919959	920092	902493	906419	238329	232565	231781	222765	238676	237937	229920	222206	115186	120512	120625	120744	120257	115643	115729	118298	411616	420732	412274	427737	428290	435549	428328	430607	176706	178838	172722	181236	183926	175161	179455	181048	16349
-6.35	555122	549345	540354	544570	571461	578960	569793	565511	878417	910097	896594	893351	914993	923100	901766	906780	239217	236901	234828	223320	232746	233675	230897	229245	114997	117201	116682	119639	122673	116002	118723	119114	418854	424083	415448	422839	432131	433214	424885	436477	174898	178355	175491	179174	182316	178628	177334	179569	16508
-6.26667	555066	550144	545280	543637	573734	582784	565811	565634	884241	903201	894424	891585	918261	930030	900400	906786	235214	236882	234245	225686	232540	234939	231424	228502	114586	117777	115381	120223	121565	119287	116656	117509	420847	425350	412593	426055	428816	436072	425362	426490	177432	178773	178416	181929	179690	178381	182542	181550	17082
-6.18333	558093	555869	544404	543064	578330	582514	572371	568658	883564	917046	894083	893106	924319	922934	902708	919564	239338	233233	232865	229040	232915	236536	229706	223466	113254	119021	116532	117141	119824	117682	117995	117401	423938	425924	415837	431562	429150	441400	431822	429774	178533	177486	178942	181814	185974	180147	180839	181816	17112
-6.1	562098	558087	552823	553740	579536	585003	565986	565781	885831	909581	890082	899491	923127	931345	909522	911824	237691	231745	236366	227397	232065	236484	228802	229108	115044	120398	116985	118135	121225	121704	119285	118881	424066	426305	420141	429263	437965	448829	429128	433261	178277	180884	177516	181627	181764	177348	181729	182451	17431.5
-6.01667	564468	560763	552631	556514	580421	587950	567256	569909	882507	914567	902749	894308	926172	937113	912828	915448	239544	233909	231835	227864	237640	235589	230053	230006	116254	119383	120078	119622	120545	121695	117245	119399	428946	428485	419648	433460	435766	444618	431351	434489	175539	179404	176834	179302	182760	179268	181277	182675	17762.5
-5.93333	563584	564344	553672	543971	575975	589426	573930	571519	892337	919695	901804	903472	922849	928419	909555	911899	239490	235864	234301	226994	234956	236810	231106	227072	114563	118967	120166	121960	119423	118713	121662	120333	429039	433089	422561	435701	432466	440932	436404	438876	178433	178786	183426	181566	181423	177600	182469	179933	18174
-5.85	569268	558706	558121	549882	587266	596454	571988	569101	890313	922740	900109	907672	932277	931724	910329	915460	239283	234022	238152	229282	236361	236090	230932	232269	117073	120939	119095	123030	122491	118312	119244	119570	432520	433520	425630	436309	434882	443626	432030	435913	179729	183263	177207	182795	184472	178000	181513	179961	18422.5
-5.76667	561275	570409	557216	553217	586577	588468	576192	578082	889076	925216	895644	903662	933335	940769	907819	928295	237917	233031	234323	228912	235073	233076	230446	230950	114884	119274	117943	120185	122405	118950	119129	119080	433713	437600	419875	431882	439615	443063	439119	435822	178908	178390	178600	180017	182128	177926	180420	185273	18676
-5.68333	576336	568402	552617	555963	586538	591961	576252	583019	899731	920048	906907	909600	929082	932801	914846	921844	243824	238527	233811	225751	238128	238640	230558	231604	117080	121855	118396	121902	120761	121288	117770	120721	434588	438496	427377	440979	442445	443465	440308	438642	177439	177079	180239	179754	183527	185792	182971	180035	19023
-5.6	574421	568665	552897	556953	586099	590798	580764	577697	891420	929039	899279	898137	929002	925549	919463	926060	239743	239216	240886	227660	234846	236504	231932	232559	119769	121166	117582	119887	120718	120698	118169	117448	436034	441840	425481	440093	439407	447708	443464	441335	183270	182123	181366	181931	180408	179808	180070	185522	19412
-5.51667	577829	564304	555537	557494	588255	595955	577723	583185	896886	922858	914755	910663	932625	932143	918949	917030	237745	241528	237564	226498	236162	237991	230931	235394	120113	122005	116812	120451	121596	119098	118876	120231	436857	437453	428516	438965	438910	447463	441850	446139	181249	180192	181166	180898	187193	181993	180557	182437	19475.5
-5.43333	580997	572235	558706	559364	590577	591526	577008	577558	895642	935640	905276	902548	937061	930924	914348	925427	245456	238111	235411	226407	235747	234417	227377	230619	118516	120985	120077	121022	121297	120397	115437	121032	444005	444200	426930	440970	445444	452547	442177	445830	180420	181678	178814	182282	185298	176492	182384	180935	20198.5
-5.35	579929	567240	561274	560304	591587	593326	577470	581535	899334	924090	908654	907731	933774	942434	912006	920752	240901	238299	236331	231289	232928	236313	233902	227908	118534	119490	118865	120757	124598	119730	118466	121163	441547	436472	429607	445154	447219	452406	442830	449126	182284	181119	176342	183040	182952	181334	180518	186614	20271.5
-5.26667	577534	574461	562407	563000	592296	595135	574625	577740	898874	922461	910053	900694	934290	941395	915731	923864	239511	242036	238179	230152	239978	239067	230366	231141	117323	121216	119655	124261	122473	119173	120706	121069	443807	449714	424050	445027	447240	445954	444637	446735	180956	179776	178574	182718	182518	180166	182406	183224	20825
-5.18333	580225	575743	567074	564443	595599	599822	578076	587300	905200	928526	908587	907311	932340	936133	910563	925074	243333	239177	240644	228294	236450	238017	231645	232235	117299	120590	117457	126354	121627	122698	116472	123599	441827	443865	426944	442942	451209	452313	442199	440450	180575	182405	179344	182530	183904	183448	180181	182820	20634
-5.1	579670	571697	563052	565938	593798	599950	578417	583704	895850	929817	911239	902981	927355	937318	922237	927327	244930	239245	234841	230210	239408	235865	231843	231095	119166	122242	119185	123952	123673	120995	119009	119912	448786	448630	429158	448342	454082	449261	440913	447352	182377	178767	183122	180787	184135	180238	184064	185440	21185.5
-5.01667	583226	576318	565367	568781	602044	599797	578353	583678	901132	925383	909809	912759	934248	937520	916000	916744	241978	235161	240018	228510	240075	240917	235396	236010	119217	122552	117176	124637	119842	121661	120318	120637	446704	444364	431315	451886	451765	455300	442969	451383	182925	181550	180252	184314	184134	177446	179885	184669	21389
-4.93333	589414	576547	561190	571067	595919	610200	582677	587130	911401	932485	914738	911787	935144	939515	924404	929372	241624	237473	237278	227284	238088	240381	235117	231856	119432	123936	119053	126046	121997	124957	120010	119789	451442	441883	435130	455035	447137	457733	444203	454172	181931	181168	180271	178902	184360	180816	183242	183269	21877
-4.85	587000	583142	562027	566437	601177	606753	583430	588209	904427	934570	912297	911140	939016	945271	913849	924069	237735	240293	241643	227256	240062	237790	234959	231964	119531	122297	116805	121535	124300	121025	120705	122195	446770	452180	439985	453403	450808	461586	449303	447046	179955	177139	179922	180030	183510	180605	183561	184067	21878.5
-4.76667	591186	579955	570782	565885	601504	612693	583778	586822	907263	933700	908757	908718	947564	944458	918512	931663	243601	237175	236078	225350	237819	241816	237521	232123	121169	123773	118094	121155	122991	121334	119486	120274	450823	452659	435567	451698	460587	462109	444811	449052	182226	183150	181707	184549	184845	184098	179839	180016	22462
-4.68333	588786	586116	569872	570963	602720	608773	585415	591635	902293	933974	919357	918381	932690	942122	924593	922172	240981	239351	240917	226138	238721	236538	233943	234362	121639	121779	118372	122612	123865	120495	120047	121573	449839	451153	438326	459220	457417	462997	453827	455107	180326	181974	179539	183584	184384	181708	184819	182743	22622.5
-4.6	600473	585052	568663	569592	605465	608049	589208	593707	912378	938363	920146	909839	941713	944046	917910	935387	244563	236819	239598	228814	236959	239025	237339	233851	122499	123111	120265	124514	123772	123891	122098	124076	452988	453029	441467	455996	457059	462250	452033	451197	181061	182186	180304	186009	185052	180687	181530	185157	22761
-4.51667	598649	586176	571886	571766	602723	602463	586206	590317	911891	929468	915407	911359	939115	938845	926136	927026	239313	240235	237703	228638	234649	240921	236961	233820	121791	124005	120902	124064	122604	122981	121741	120260	450455	452241	436048	457751	456111	466259	448288	455847	180258	179633	180897	184965	183538	180391	181606	185899	22969
-4.43333	589621	585914	581252	576016	607079	612672	588578	595618	907093	934851	914737	914699	938207	948696	920580	932341	244009	238555	235072	228610	242026	239571	238249	235510	120189	123602	121754	121453	123865	124577	120632	121242	456549	453994	444288	451552	460488	462489	453732	457482	183178	181915	184407	183766	185049	184636	181431	187429	23380
-4.35	595700	593409	571009	575723	606879	608247	592338	594517	910239	926847	914432	918149	940928	947716	918373	929203	244221	238607	237392	226825	237141	239041	233592	234872	121958	123558	121189	122740	124017	120143	120168	122668	455710	453254	440035	455270	459368	461115	457427	460261	185032	182353	181677	183004	187627	181922	183881	182879	23744.5
-4.26667	599708	587760	571124	573892	607813	613123	588309	588387	908959	941448	920619	911198	945089	939893	926659	933201	241477	238205	239538	232281	237091	237898	231672	233873	122906	123711	120951	125154	123976	124228	120142	121571	458943	458360	437613	460432	460793	460222	449063	457960	185794	180686	183866	187187	187197	182985	182235	184161	24136.5
-4.18333	599171	592117	572761	572704	609778	612328	593321	594313	910473	928995	915116	911315	940741	940629	932784	922390	247393	237667	241410	232574	237880	240396	236220	233219	122125	123205	123380	121424	121032	121766	122488	125155	456938	461071	443239	460356	457744	465893	453908	464804	183161	181545	181437	186112	185090	179115	180018	182504	24279
-4.1	595058	589389	579380	571549	608929	610076	586718	598155	911600	932096	924897	914567	934286	943109	925784	933722	240951	238192	236888	229619	241899	238668	234556	237196	124375	123746	120954	126922	123291	124198	120963	124188	458969	457078	444476	462881	461759	464626	454625	460866	184887	181395	182796	182489	187284	181751	184436	185978	24614.5
-4.01667	598187	597967	579270	576458	610025	609533	590799	596055	917228	937309	916903	917029	946703	941949	930908	933324	239580	239525	236448	228178	242330	239958	236303	238302	123281	122810	121027	123253	121943	124553	123978	124820	460783	456668	444348	458131	464911	464441	460450	459796	187405	187317	181774	182061	183192	182553	183230	186812	24916
-3.93333	599777	597217	573705	577534	617491	613756	588992	594460	913409	940351	911804	915006	939250	946920	923933	933086	244060	240899	236002	227283	239323	235183	232662	230982	124836	124658	119759	122002	122466	124183	123413	124498	453599	459240	450021	462634	464433	469378	456839	457093	186442	183723	182272	182281	186879	183422	183762	184979	25118.5
-3.85	596797	595966	581669	573181	609781	613205	583689	596624	913925	931331	914613	917853	943865	949151	923914	934630	245631	239062	234056	227166	238853	237934	233770	236732	120551	123612	121959	123621	124732	124830	122261	125025	459024	459383	447749	459918	465678	474860	458217	460189	180781	185692	180437	182657	186719	181988	182927	186260	25256
-3.76667	599275	596885	576566	581055	616513	619000	591000	598933	918398	946820	915647	908966	947761	943679	920923	936027	243091	238712	238770	230853	234654	240171	234711	240079	125742	125054	124604	125857	124622	121994	121902	125499	464580	461062	445656	465959	466169	468898	463261	474487	184288	182812	179946	183467	184488	178823	187394	184777	25493.5
-3.68333	596694	599177	578630	583209	616808	614548	586029	598897	917459	934683	926080	911217	943679	941129	923798	935428	243915	241991	235504	228946	236796	240849	235476	236270	124090	126795	123346	125270	123767	123922	121098	123903	462613	465823	445855	464231	468667	476388	460557	462552	182310	184078	179944	182351	187108	180420	187002	182716	25910.5
-3.6	605031	596787	577682	577804	618251	612559	589943	600729	919327	933019	919685	922814	932045	949743	921423	932508	246872	240363	237458	227314	237916	239592	234720	232865	123663	123327	121504	123309	126020	122167	118868	125320	462287	461913	455110	463547	467190	475487	457281	462432	182601	182513	184561	183481	182712	182434	185024	184171	25995
-3.51667	605541	593751	576900	586294	617476	621890	597867	601517	913270	938945	915748	915908	948252	939937	928056	933334	242966	239356	237295	228601	240362	242881	233573	234732	123344	123098	119390	126532	125205	122992	124099	124125	467789	464469	450703	468980	463929	476699	460720	460754	190384	182047	182966	184251	186552	182655	176121	181287	26471
-3.43333	614884	594358	583674	586598	610888	616753	591245	604021	918118	942247	921880	918283	940383	942983	925243	932454	247217	238795	235954	227950	238796	241920	236137	235843	121959	126531	121310	125042	124956	127023	121194	123564	463815	467732	451095	461075	467773	471502	459480	464921	185442	182911	179308	184475	186871	183116	182026	182179	26466
-3.35	610392	593765	585691	582442	612106	612547	592851	599764	924011	936551	907771	909830	946940	950242	926563	931743	247558	242209	236052	226143	237511	241408	242665	235081	122428	126017	122211	124292	124876	122932	124615	123897	475441	475852	451657	470909	469655	469000	462463	469520	183940	182079	183033	183864	185976	185819	182438	185225	26792
-3.26667	608056	596244	585115	583583	616981	616671	586511	610345	915001	939591	923233	907660	940580	947254	924979	941499	243903	237617	238272	229416	234160	241549	235865	235054	122237	125556	122607	124508	123941	125264	123126	126102	467666	471714	455871	470364	466572	474043	462326	474056	187512	182476	182334	184398	186282	181975	186982	187482	27136.5
-3.18333	608000	595757	583921	587986	621673	613115	594458	601482	918043	935698	912959	914001	943077	954776	920879	933205	243568	243860	241032	227114	238841	243486	234945	240149	126043	126376	123020	128256	121937	128396	119919	123736	473048	469017	453686	464876	463612	471552	466901	467435	185616	182626	181264	185054	184353	181689	183464	185166	27230
-3.1	604888	603561	580558	584623	617519	616463	595578	600108	912138	942474	918090	906717	950479	943800	926500	931339	245363	242910	239329	225284	238236	242292	233240	236837	125779	125164	122747	130164	125620	125994	121912	123114	467672	469985	456706	474511	471371	477663	466332	471881	188039	183728	182003	185117	185281	182576	182813	187922	27664.5
-3.01667	618491	605876	588438	584107	622739	622306	599587	603366	912870	938420	916033	912948	946043	943658	923433	937171	247415	241141	241119	231514	237932	242380	235206	235363	122844	127955	121724	126561	125349	126031	126298	122893	472091	469345	449811	472952	473102	480676	465657	467993	187623	182513	179515	185258	184974	179968	184177	183851	28070.5
-2.93333	610238	603205	584637	590979	619675	621090	597765	606683	929176	945497	929332	915621	943459	938892	931634	931419	246771	241994	239354	229777	236855	240569	232416	235369	126330	128517	120672	126799	124113	125814	122060	124707	473218	468011	455336	470729	471531	477261	463950	470828	182809	187143	185551	186752	188258	183432	184632	182379	28331.5
-2.85	615893	598883	591907	585356	619886	623651	595298	606992	922794	935233	921722	916896	937044	949323	928597	944800	242562	242696	237924	232958	242398	237875	240400	231514	128556	123046	121812	126134	124476	124671	122736	125231	471305	476030	449961	474994	472688	481391	466163	472110	185674	186130	182534	184430	185999	183914	184361	187537	28620.5
-2.76667	614504	595378	593260	594964	619974	616665	600232	611433	918844	940312	919074	917125	939029	939047	922328	936336	251825	239504	238540	228043	240237	238551	231773	239021	123477	128115	123737	126445	123521	126959	123115	123338	479697	471704	455623	471935	477426	475750	464349	476093	185418	184032	180000	184298	182583	182596	183889	187570	28717.5
-2.68333	616336	598399	593185	585575	622851	628807	599746	606195	915665	939557	922168	906249	936613	937871	921536	938864	246614	241555	238291	229462	240622	238639	238797	237905	125236	128219	127413	124782	126266	126344	124312	122797	473762	470715	458979	470376	474605	480968	475406	474421	185968	184035	184351	182871	185590	181766	183280	185556	28640.5
-2.6	617060	603901	589133	591454	620928	628245	601945	600100	923301	933082	915292	919975	943792	958668	922436	929886	243614	238531	232267	227957	241958	238777	237719	240486	121858	128228	123006	127171	127589	125147	126703	124523	477364	479207	456088	475658	470836	478981	474717	472297	183453	184188	183034	186858	187120	182372	186238	188612	29481
-2.51667	621082	607241	582381	586316	623265	626908	597139	603917	922928	939329	926108	912629	941816	947492	920784	935122	246737	238124	240842	228810	237661	240524	234434	235098	126416	126558	124051	127536	122751	128080	122659	125359	478487	475603	457411	472750	476738	477851	467594	466530	185657	183220	184812	184802	184708	179490	180978	182623	29660.5
-2.43333	614829	597902	586330	599521	621641	624740	600426	604020	923353	933041	912813	912720	938111	943150	924879	929866	248680	240205	235034	227385	238981	239906	233914	236300	125316	128136	121619	126249	124641	123784	125080	128673	474952	479524	460310	476568	476631	478390	470596	475030	187244	184319	182202	184988	184823	181774	183321	185383	29518.5
-2.35	617903	608494	584973	593324	624873	619331	594334	606028	918292	945568	920266	912039	946506	943984	929011	928262	245605	243240	241420	227863	239644	239732	233199	234161	124038	125031	121072	128313	124828	125171	122553	125732	484385	477672	453243	472564	476669	481181	472010	478645	186496	183968	181992	189836	184160	181306	184865	185232	29987
-2.26667	618518	606315	590054	592474	621328	621604	604057	609825	922374	933586	915870	917147	939714	937796	925029	935550	246334	241151	237645	228320	236489	243836	232484	237623	124599	128688	124959	126250	126033	125313	123054	125087	475401	472962	458817	483890	482384	480385	468110	473952	186390	183911	180868	183145	189287	181615	183272	185823	30008.5
-2.18333	621154	602301	579658	596787	625814	626856	601831	609598	922502	944484	917126	913670	940823	946435	925050	929261	244676	240405	238379	228689	241124	241285	233316	235968	126249	126924	123541	128969	126778	124531	120892	130464	483258	471159	463894	479758	476427	482266	472253	480720	187668	181945	180253	185627	186061	182074	181079	186545	30177
-2.1	620834	599315	595179	590026	632225	625105	600770	606931	916068	937424	921274	908879	941479	934605	934154	940023	247002	239093	238621	226544	238037	243358	232422	235713	128087	127806	124028	127825	127410	126111	124254	127773	480261	475016	463609	478202	479356	479549	472082	475315	185024	185273	181491	185643	182998	184563	183971	183049	30640
-2.01667	619590	608141	593464	592574	620893	621889	603168	605281	914675	932758	922080	911445	940626	939714	915742	924240	244634	238211	237856	230416	236566	239164	233136	235734	124173	128132	124262	126081	126108	124229	126946	125386	482673	481713	466271	474007	485206	485372	470263	481637	186055	185280	181261	184250	186986	182005	185136	188099	30640.5
-1.93333	623415	598836	590242	595991	624695	628357	602255	609474	920094	940713	910504	919912	937046	941942	921804	935208	239362	241443	239136	227527	240973	243337	234329	233937	126190	129517	125011	129173	126312	129207	124828	127162	482712	478197	458754	483398	478539	478949	468610	480475	183794	185574	182901	186153	183890	183822	184504	186609	30975
-1.85	619006	600863	593061	590359	618941	627600	602156	604865	918469	931348	913953	913388	922345	944178	922268	934487	246106	240687	236796	228053	243220	237339	236819	235377	126613	126442	126166	127678	125775	129268	122204	127833	479134	481511	464861	484453	475620	484811	476925	481415	185165	185909	180686	183876	189202	181503	183965	185542	31207
-1.76667	612821	611091	595554	592824	623954	620966	600952	597236	919739	936845	912412	914355	938557	938296	915905	932780	243787	241340	239280	229132	235994	235760	237314	234432	125218	127023	124739	126489	126005	125616	122478	128516	483212	475157	466940	475309	481564	486256	471086	477105	185531	187612	181441	184669	186840	184273	182951	187010	31443.5
-1.68333	607963	607718	590326	597695	625582	624904	606134	600777	915580	927784	913195	912691	934487	942610	923439	925777	245085	240907	238271	223596	238061	236769	235207	236952	127306	126728	124697	127735	126716	125836	124233	128731	481858	478284	462346	487024	483532	487069	478839	480948	186729	184509	185973	184186	186150	183018	186663	187787	31579.5
-1.6	616121	607841	586890	589765	631082	623933	598595	609572	918776	936009	916214	912137	942990	942973	911828	928695	247547	239125	235796	228174	237698	240152	235236	238514	128904	128882	123554	129079	125419	127924	122307	126591	484301	486289	466060	483128	477092	486485	470021	480277	187521	181870	184800	189552	182266	184497	186071	186394	32043.5
-1.51667	619200	605651	586623	599053	628759	630359	594221	604170	917569	936040	916291	914654	933897	945542	920273	933116	241282	239277	236155	231747	241774	238816	235601	235709	125869	127038	123551	127310	128545	125371	122963	127054	484481	487935	468419	479982	482138	486083	472173	476888	186155	189360	182779	184307	188236	183087	183261	182158	32339
-1.43333	616347	604387	583775	602433	630005	623304	602506	606852	919449	932536	918157	911428	937013	942503	922123	927632	244244	240415	237281	230081	237444	240206	233254	236608	128913	126489	121936	126464	126362	125922	123944	125442	481816	478106	462074	479165	478948	481209	474663	485682	186311	185245	182874	181964	186583	184658	182857	187927	32201.5
-1.35	617224	611415	602748	588073	624587	620359	606494	609937	920114	937481	908885	913765	946326	948148	913446	926501	247283	242690	243512	228501	235506	239703	233523	236464	127501	125024	126267	128170	126255	126558	124282	123944	489171	483856	463069	483976	483410	487502	475725	482156	192769	185103	185762	188025	183107	178849	180559	189438	32671
-1.26667	616008	608278	594504	586286	624586	626813	606260	610753	913130	941346	914284	909736	936431	942830	921926	929147	246003	240477	240647	229664	239503	237460	235164	235930	125628	124537	127105	128290	129415	127474	125557	124647	490950	488011	475267	483406	481741	487338	478907	481367	186143	183849	183447	182525	186065	182228	186333	186355	33191
-1.18333	614899	606485	598245	598474	626901	621552	604934	608241	913942	932203	910738	907168	935704	934808	926141	943924	247926	239305	232546	228969	235391	238597	229984	236828	125479	126911	122561	128698	128905	129778	123813	129342	482889	483245	475620	487759	479516	486316	476726	483994	188726	186472	180637	185785	184383	183255	181957	186179	32931
-1.1	624840	613345	603580	595343	635571	628392	605276	607098	917975	932035	910607	911809	936495	939544	913780	934529	239724	238777	235295	228016	236597	239439	233041	235628	127818	131047	124577	131305	127232	129009	126817	127047	491261	491269	468647	486371	481689	479379	474230	491731	188633	188985	180589	187054	185726	181659	182769	184028	33289
-1.01667	623688	607493	595068	600812	628730	629019	601785	610539	921621	929050	918511	903586	936356	941690	913609	926022	242274	237720	236986	225902	233444	240544	234796	237677	127540	126694	122897	127959	128119	127057	123385	126351	486679	479075	464912	487242	483651	488522	477950	487375	185598	184020	184424	184355	185538	183605	184318	186184	33350.5
-0.93333	625376	614315	601458	594837	634158	618622	602552	612915	916187	931390	911213	910991	930596	937145	918301	933111	243680	241018	236951	228640	239357	237639	235064	237788	127256	126251	124867	126974	126213	127464	125547	130159	492377	484402	465148	481677	477225	477646	474174	486410	185354	182629	182515	184149	187641	184830	181306	187184	33589
-0.85	616321	611840	598493	593923	630094	624040	607017	611191	921894	930971	907268	911605	940227	939084	913614	925495	241945	238203	237556	220694	236023	241501	235321	241606	126598	126231	122762	130107	129259	126327	126264	127051	491695	487509	473384	489907	483956	487882	475377	483464	186544	184565	181292	181122	189189	181551	182649	185134	33881
-0.76667	625647	612762	596143	591004	631370	625313	596487	609020	915457	933012	910116	906488	923221	940823	910823	926169	242768	238821	235418	226362	237908	234153	237377	234381	127656	127816	125138	129277	128993	125643	123000	127231	491098	489652	475777	490616	484328	486653	483284	490721	189506	184944	180931	184716	184538	180703	181276	183105	34186.5
-0.68333	623210	610609	590962	595329	629212	621184	603447	611042	922267	931249	904299	905817	936387	935181	918450	928904	244229	235880	236155	227963	235987	239055	233559	235129	126489	129020	122692	127301	128882	127948	122404	126323	492778	491187	465682	484431	484499	486279	481110	486150	187962	186093	182722	185310	185204	183097	183434	183859	34612.5
-0.6	621698	610907	592245	591958	622761	630818	607535	610728	922105	937087	909992	904386	937195	934993	909905	915265	241847	240903	236927	226984	238303	237931	230197	236555	129456	130500	124567	128928	123106	125688	123615	128227	497829	486867	473722	489368	483333	489345	476783	492146	187122	183016	180751	183041	181533	183030	180800	185881	34790.5
-0.51667	620931	612149	592557	592397	633879	634871	604679	606992	914326	935913	915023	903725	934882	937612	915797	927783	244023	240678	233995	222165	239062	239266	235473	234778	126859	126940	126792	129934	129421	127372	125993	127240	496585	493153	471234	494932	485552	497459	481123	493125	185608	182148	181033	185717	185627	184495	183588	186425	34753
-0.43333	624211	609643	606609	596502	631561	629269	601617	608074	919344	936405	908223	909748	936183	934463	916175	919626	244080	237857	235994	223390	238724	237191	233248	237379	125561	130715	124000	130440	129238	126420	125367	126276	492461	487185	476545	488364	486129	492052	479178	489620	189179	182344	182804	185040	185582	182341	185648	187600	34953.5
-0.35	620730	603999	589805	592628	633709	629837	609206	610353	914947	932839	911843	910614	926596	933127	917009	925458	246394	236693	240820	225632	236156	239668	231479	234482	126591	130034	124766	125601	129056	126066	125609	127221	491958	484967	470882	489076	484585	488471	477297	491397	185673	184957	181865	182653	184877	182076	181267	184839	35058
-0.26667	617885	611098	594263	590611	627892	632248	604066	615930	915426	928509	901851	911303	932897	934077	905494	919640	245113	238278	234409	227181	236764	236993	230808	233241	128006	128846	125888	129757	127904	126060	122241	130309	493479	489382	473651	492228	481547	493335	474780	491066	187841	183147	181589	185264	181975	178715	182432	188030	35508.5
-0.18333	626043	615901	602381	598492	634533	636555	599277	610793	908747	928024	901516	904287	929708	937349	916788	926203	241543	242163	235010	225236	232179	238705	231742	235108	127652	132460	124535	129615	126948	125778	125405	128231	492264	489295	475692	490807	484477	491445	477050	496815	186648	183144	178446	188052	183976	180764	179101	185072	35436.5
-0.1	624819	606433	592523	594673	632092	626881	606687	608224	915936	934799	908044	907987	933411	938558	908515	925088	239898	234282	240463	226617	236974	237779	234684	236063	126982	128910	123568	129319	122924	127539	126119	129450	495164	491198	476843	488970	487336	488202	477398	490979	186531	186264	182650	184769	182453	180048	184111	186723	35991.5
0
0.13333	603773	589413	579345	574369	604667	595248	583523	593197	892029	895229	886162	882730	900733	909863	884631	894174	236950	227552	227157	214534	228092	225294	223007	224878	124074	122550	118424	125748	120041	125189	120550	122798	479425	474395	456052	471622	470007	476267	462428	480076	178963	176428	171412	176716	177084	175143	172509	171770	33715
0.21667	615060	598025	578187	574159	592142	598157	582673	589719	890598	898361	878955	883256	902879	902886	874809	893825	236338	230305	226170	215043	225369	226571	225159	224030	123252	124559	118410	124309	121177	124151	119101	122244	480889	473778	461567	469592	467756	469265	465973	473660	179921	177917	173782	175906	178883	173026	173258	180397	33968
0.3	604675	596776	578443	580235	600887	605060	581906	598605	885154	910148	877431	885894	905718	902381	883663	886266	234787	225669	226336	218606	223215	226898	221353	225049	122763	127496	119592	122633	122685	125677	117585	121003	481729	473700	455829	469385	467693	475393	466604	476788	179207	182605	173724	174469	176464	175836	173067	181223	34585
0.38333	605691	594498	585443	579450	597253	600049	585661	598611	888658	906551	873671	884161	898302	898645	881798	893114	236486	232554	229898	218888	228282	227444	223248	225888	124926	130442	118807	122617	121166	127436	117378	125352	484745	476161	457042	471514	468792	476280	465531	477088	182044	180384	173287	171560	182168	178780	170669	180836	34759
0.46667	602962	593164	578136	576498	601350	607988	585966	591010	885150	904483	871338	883980	904062	902361	883194	892410	235683	233151	223530	217727	228878	232503	220566	224616	128460	130902	119172	125042	126055	130862	119248	123038	482766	482663	458175	468719	473736	475605	466948	484059	182461	185056	174643	177661	181957	184525	176580	178412	35660.5
0.55	615034	595441	588225	582758	603641	610683	592174	595191	888518	902102	880907	886846	902697	896134	880732	895099	243008	237941	228342	219524	225452	238547	226271	225679	128905	134188	119860	120186	127686	134834	123888	121049	487170	484548	457238	474286	473855	478866	468703	470615	186594	185907	176152	175619	185306	188880	172681	178725	37134.5
0.63333	617073	599223	588016	573313	599042	607308	583276	593314	888866	904366	881937	883411	900315	904454	883785	895024	242310	242678	226305	215361	232913	241059	229355	227193	129666	141125	123105	125226	130126	133729	120945	125103	483642	482710	453964	475791	481125	486876	465432	484870	187407	194662	173655	180939	189621	189868	179193	180259	40310
0.71667	622031	599050	581745	581090	597808	612427	591619	595120	891729	906130	875502	880287	899604	903268	876786	899855	244858	244735	232163	220029	233462	243267	226622	226496	136658	145486	124694	125622	131486	139071	122139	123794	488678	478969	468296	472124	476686	480286	470489	476491	193249	199555	178755	176645	187440	195370	179259	177411	45665
0.8	619571	604404	589765	582459	611357	607649	595480	601000	895835	908237	879003	878178	907557	904674	890803	894646	242112	247904	233123	220947	236938	246253	224448	228740	141014	151096	126754	130119	136432	144411	129304	128292	495075	485974	468347	483885	480181	484050	475474	482105	191561	202587	182819	182987	188962	198687	178823	177012	53379
0.88333	619894	606841	588444	588470	612297	615760	595796	602426	891004	906001	879025	877621	905749	916690	890315	895255	246986	249077	230517	222105	236985	250492	228917	230448	144329	152481	129891	131125	137432	151373	128788	125997	490922	493330	472762	483609	490010	493169	479646	482656	198380	206771	183221	185033	194608	205390	185136	186320	64481.5
0.96667	623785	607807	595914	597530	617314	616010	599517	608985	894424	905985	883435	883316	915484	908260	886391	890873	249715	255860	235366	223505	244067	251261	231558	236364	147913	158331	129532	131724	140447	155072	133903	128517	502996	498219	479515	479948	491370	500532	478236	488459	203549	211318	187152	186165	197757	205629	185494	188124	77622.5
1.05	640146	610322	597133	595164	620459	624763	597951	611719	907181	921575	893670	885373	910272	911072	896648	898504	253430	253849	238391	222395	240093	255750	235574	235248	147858	161473	133454	133665	145862	158175	134668	135340	509110	507748	476756	491941	497162	500999	491918	497404	204482	211050	188215	189060	200802	209785	189189	190410	94385
1.13333	641024	614621	601894	603299	630784	632665	611231	621009	910319	917837	894460	891659	917166	913486	898868	900369	258874	261845	240795	230219	248605	259490	242145	238124	155458	165598	137823	137861	146722	158492	136436	135870	510458	507969	482996	498165	504944	508578	492805	497554	205274	217329	190278	193779	202623	215400	195523	192838	108006
1.21667	649581	625546	610824	596868	640316	638016	617971	621668	905084	925732	893233	897915	925953	924532	893745	908057	263359	264096	241198	233037	249565	260648	240561	240287	154562	169989	138432	141954	151249	161735	140468	141132	524158	519939	488154	501786	511084	520303	502884	504074	212117	221043	191188	196115	211205	219356	195963	199206	127749
1.3	652715	634871	612715	607476	642062	645678	620033	621702	912951	928720	899190	895005	929236	924130	901923	914351	260315	266171	244829	232709	253646	265056	240580	248174	156859	177038	143316	146479	156152	167981	145996	142319	535020	527582	498590	507092	518911	528158	511646	511973	210747	221439	194732	201366	211254	221286	195097	204121	150024
1.38333	664781	633842	622436	615666	654300	653677	626382	631187	920783	930083	897872	900291	933045	941121	905300	919235	259428	271733	244415	237032	252381	268103	244108	251623	159663	177513	146495	148062	156430	172161	144670	147955	540933	535065	512994	513160	525208	536512	515659	519601	217848	229626	196836	206611	212476	219526	203031	210111	166710
1.46667	667677	645196	622689	624443	658084	662013	640681	635928	926002	942266	903064	903444	939413	936692	916773	916506	263591	274530	244885	245276	256000	268396	241750	254140	162295	178033	149978	154896	157731	171865	152941	150110	550086	544122	513997	519704	531901	548158	528788	525360	216621	230776	200235	209242	213034	224084	202208	211049	187244
1.55	681292	651179	638531	617014	670661	670972	640095	643590	934043	935743	913040	912470	939561	942086	924137	929549	268722	272885	249942	244972	257815	271195	249717	256923	164021	179887	153178	156095	159207	174253	151106	155716	556422	545718	525203	528329	550920	552608	526772	537431	221906	231968	202519	215643	216528	228314	205519	217141	202999
1.63333	684481	656577	640216	629864	670648	674288	653471	650167	932384	943144	925676	918780	951326	943714	922304	930478	266690	278710	251492	248303	259015	272688	249094	257101	167844	183381	152900	160421	162324	179503	152580	160609	565383	551897	523443	535185	547426	562652	540554	543989	226457	235775	204356	219771	216777	232396	205957	221641	222940
1.71667	689066	666771	647477	634838	681936	686331	659449	652644	933804	946714	922646	920044	950294	952361	933802	940066	274343	281316	256822	255145	261843	277785	250360	264212	171700	185960	153817	165834	168066	179265	155593	164519	578195	569356	537285	545773	561975	568373	553107	553446	226374	234640	208484	221714	218861	226887	208195	224477	240174
1.8	704075	664730	658517	639489	690225	691926	660507	666738	951842	956123	930269	915345	958300	946138	939199	942292	270778	284530	254601	257178	263281	280574	252845	268600	174826	188828	159406	168304	169296	181982	159047	164123	583264	578261	542254	550740	562409	576471	561028	564782	228502	236792	208461	225176	222346	235498	212086	226304	256549
1.88333	705110	687694	655729	640318	690475	693766	668931	667759	955193	960501	931435	929558	959318	965309	932376	933386	272431	279968	253853	256665	263887	279623	253199	270872	174688	189884	160451	169050	169529	184467	162512	172090	589736	584667	553850	556586	573703	591319	560888	573121	228899	240110	211540	225742	222999	239840	213789	229982	271916
1.96667	710317	686762	669551	649527	692713	700787	671241	686140	956547	966708	935340	940280	967906	954984	948488	955278	274082	286380	258360	260020	268393	283877	253371	270904	177014	191699	156706	174754	171407	185584	161958	172634	597051	592840	561254	564931	583607	585419	570436	576172	229952	242961	212435	229442	226574	237086	215137	230525	285836
2.05	720558	695205	676552	655827	712623	713975	681030	683921	960225	972626	940462	938410	966744	972995	947567	951096	277913	286842	258111	262524	268442	285371	252938	271310	178865	195695	160948	173264	173132	187603	165583	175045	606254	595160	563254	571423	594920	591953	579020	586467	228397	242398	215073	231200	229375	239696	215717	234091	300024
2.13333	726234	699091	686454	662648	713718	719907	691513	691150	970989	973361	946048	939337	972292	967912	957789	952247	279523	280302	258162	263092	274598	284366	256957	278540	178299	195029	160670	179796	175215	190260	166273	178079	620805	600522	572586	580178	597212	600171	579789	589269	237149	243751	214795	237609	228549	236836	216064	237633	315283
2.21667	726297	707945	689226	667912	716936	724346	685781	697117	961180	983193	950302	948613	975257	973823	956427	955802	277536	287798	260189	269617	270326	287917	257396	279609	178576	197978	164218	180890	176071	190652	168185	180422	618319	604226	582617	580372	605855	616030	587740	597520	234073	247414	216562	237022	232018	243414	221062	242089	328289
2.3	733810	710861	687818	673088	725161	728936	693120	698022	967889	982733	956460	941728	972863	980194	951106	960099	279708	289311	261798	268483	271627	287962	261591	281034	182524	199692	166448	183949	175612	191698	168630	182710	625510	616185	587754	585017	607409	615989	595006	595326	239729	249752	221019	239510	229603	244452	222731	242301	340990
2.38333	741815	716162	697083	675039	726210	735271	702227	703032	971999	977763	958172	946551	979065	979611	961495	956383	282771	290380	262375	268031	270481	287133	259244	281085	181228	199715	167650	186604	177541	194466	170331	185626	634804	619455	586396	598515	614510	627383	598704	608370	235156	248171	218549	243155	233277	244461	224672	241126	351492
2.46667	746002	724486	698588	678325	734059	733365	700007	712812	978257	989355	953436	940942	989371	980169	969132	965099	282195	285314	263602	273307	271390	289186	257073	283714	180778	199602	168432	185956	178240	194520	169721	184861	634067	631164	595863	604711	617695	632245	610629	608174	235223	247642	219973	240473	235675	246849	221266	248141	363128
2.55	748266	725799	707317	682762	732101	738010	711289	719289	976825	979023	955305	948807	989083	996047	962880	970762	280709	291206	265529	272582	274935	292223	262081	283831	181389	202814	166771	189442	176164	197707	172129	192419	645472	633509	593379	605722	630472	637766	611015	618354	238230	249733	224278	241708	233838	245367	223891	245447	370990
2.63333	761238	735091	702094	693094	749857	745361	719315	723644	971727	988287	965139	952910	984118	997719	967110	972738	282703	290252	265446	273802	275980	285635	260609	285377	185367	203422	166462	189417	183122	196199	173109	188889	648975	644561	604776	614084	638384	646702	612032	626054	240395	251087	219931	245232	235960	246907	225661	249877	382688
2.71667	761082	734369	710232	696398	747875	742159	712474	727867	985729	996391	962408	957096	994630	988825	967878	969748	290669	289571	269639	279049	272032	287237	260220	286184	185525	203460	168978	193101	180261	197894	172627	195290	654465	647694	603001	617672	635810	651602	628181	631004	238572	249430	223537	247135	238875	250504	222983	251716	392534
2.8	757156	745164	715533	697539	749785	748828	725162	730589	981558	1000000	959369	954190	996710	991601	966975	972997	282315	292905	265316	276773	274080	293640	262494	292454	186968	203478	169826	195061	181989	197804	173826	194730	663144	649225	613480	620995	643218	652490	627809	637295	240552	255973	223660	252781	235792	245104	226934	254958	401958
2.88333	777387	741114	718502	698872	751273	760310	719916	727944	980901	998278	966580	962031	993155	995045	969979	983639	286074	291010	268794	273451	278896	295139	261689	288975	186456	202833	171434	192453	184794	199848	173687	196747	668846	652837	618119	622119	650601	661125	631392	634879	237087	253005	220800	250552	236381	251936	226049	250491	410704
2.96667	768988	751736	715466	706730	756558	754782	724684	737814	986075	998003	966832	970425	991476	1000000	972317	987402	285909	291483	266974	274653	273147	292318	265020	286303	190262	207939	174918	197499	181648	200677	174252	196738	671953	651998	620192	626713	652418	663882	639614	639332	242226	254778	225694	255346	237711	247275	226722	254114	423437
3.05	769884	751989	715160	708460	762480	759767	730851	740951	982990	1000000	969459	966054	1000000	997856	968728	980467	286178	290341	270162	278390	273412	291984	267558	291114	190831	204834	174458	198335	185013	199692	177594	192038	672404	664359	625744	627292	649583	660420	637251	648920	241519	256989	226939	248073	240712	252578	227374	252584	424442
3.13333	776563	761014	717608	710623	768713	765134	724983	740258	989848	1000000	967186	970222	990072	996393	977197	975984	282885	293048	267346	281230	282225	290620	260176	288446	190714	208048	173327	203825	185091	202890	177224	199690	672455	660669	631181	635512	650063	667261	642452	645582	246398	252559	225128	252435	237845	248749	224872	255889	434716
3.21667	778420	760145	733204	719686	768130	772562	730809	741602	987198	1000000	968346	967366	992797	993388	971830	985633	284715	289399	262653	279685	276871	291979	266650	291932	189636	207883	178222	200750	184106	198104	178705	196242	681377	663444	635369	643558	659063	668647	648207	653229	246676	254355	230046	257822	238764	248933	228267	258317	439064
3.3	785410	753142	731939	724721	770049	772803	730562	741731	1000000	1000000	979857	973961	1000000	1000000	971540	981096	282850	295510	266474	276823	276122	288856	265843	290328	190749	208164	174921	196037	185108	200960	181582	200580	684502	670981	635089	641326	657337	676091	647437	657234	244250	257998	230471	253083	240201	252373	229029	259474	448558
3.38333	780605	758610	735549	724174	768475	776554	738747	753540	984392	1000000	974857	965195	1000000	998639	976429	991213	289060	294368	271989	282785	275433	293738	265848	292069	188244	204584	174264	202636	186126	202076	177965	200372	683777	674910	641450	651398	666154	676960	647566	659498	243152	256981	229116	252912	241277	250474	227678	257618	453225
3.46667	783093	764435	733226	726672	775561	779257	736913	750997	993068	1000000	970066	972850	1000000	999751	978311	982449	285714	291762	270564	278790	276658	294057	267341	291952	191822	210739	173645	198340	186316	200605	181877	205496	694483	676325	645463	652028	670429	674601	653805	662395	242448	257075	226340	256541	244214	253240	232019	259058	461196
3.55	792296	767429	735063	728547	773880	777575	748986	757846	996114	1000000	971599	975486	1000000	1000000	983807	987843	287311	292366	268457	282405	278491	297194	266695	293944	191968	209262	174750	206501	187511	200001	177220	205165	691855	676812	648391	656164	678200	681442	655189	665710	246317	258564	226256	258429	241509	250858	231431	257220	467282
3.63333	799100	769287	749014	727983	785307	783049	742633	753619	1000000	1000000	979109	980921	1000000	1000000	997431	986781	284037	292419	273316	281885	279286	290622	268567	294815	193408	208294	173152	206613	183634	203652	179946	200839	701366	688891	657188	662754	675035	688382	661796	671821	245521	259650	230294	255548	241845	258022	229530	258345	470859
3.71667	793737	761768	751203	732682	786776	787570	742973	760471	997655	1000000	979435	982716	1000000	1000000	987181	986110	290903	297077	269737	284642	279168	296792	266569	297953	189179	212009	174881	206677	189429	201933	181272	205270	706661	689678	648402	659365	680555	695089	666015	673081	246342	259823	228174	257131	239295	254768	229338	260849	477549
3.8	791235	769440	750432	730889	787512	789902	745835	756993	997622	1000000	982825	968427	1000000	1000000	990056	999567	286732	292585	269450	284669	281782	296691	265574	297826	188884	211731	175133	204865	189505	201817	181347	207893	706098	696775	655034	663603	681765	691083	665861	674459	244854	257375	227010	260481	244490	253912	230476	265334	482455
3.88333	804518	769011	748706	730691	790686	786358	748616	760852	997661	1000000	987925	975913	1000000	1000000	986791	994778	284602	290932	274295	283209	281527	293397	264834	293907	194636	211496	178431	202953	188944	204132	185497	205706	702788	698181	660046	663478	686750	690363	662452	678498	245407	253388	231511	256677	243642	250469	229105	263695	490619
3.96667	809611	779943	750816	731567	787292	792236	753665	767533	997590	1000000	981200	980481	1000000	1000000	983454	999527	286341	297487	268337	284447	277815	293242	262376	297384	191996	207435	175657	204292	182901	204175	179795	204645	700632	702453	652113	670334	682529	692428	674898	689551	250301	261889	228410	255829	246455	252801	231732	262630	493454
4.05	802192	774838	745137	735554	790726	794779	750676	773409	1000000	1000000	979617	979295	1000000	1000000	979763	995310	286529	292701	268769	279069	279550	293214	265788	295011	194351	210661	181326	206698	188148	205526	183279	204381	713049	702170	663488	673983	683629	702204	670318	677897	242442	256111	232869	254737	245989	255931	231191	265223	501321
4.13333	803622	778483	755584	743860	795399	786026	758157	763123	1000000	1000000	984006	970966	1000000	1000000	985414	998483	284032	294076	271518	278779	279328	299046	263274	298739	196723	207096	182073	208255	189303	203983	183528	206635	703812	706676	666501	677131	690873	699444	674541	681362	248024	258825	228118	261201	242976	252684	227079	263031	511404
4.21667	809505	781317	754934	741120	795044	794570	758653	777833	1000000	1000000	985990	981170	1000000	1000000	985774	993464	287824	290167	266376	286345	282592	293200	265176	299145	194317	213463	180116	207499	187968	204972	184458	208043	715971	704143	664424	670780	695123	702574	672839	677867	242456	259802	229335	257902	241917	257751	230459	265665	511744
4.3	800614	790638	751291	737531	793837	789944	759993	770330	1000000	1000000	980166	982447	1000000	1000000	987175	990280	288401	290416	271590	284364	279892	294746	269710	292361	193287	212619	180740	207615	189535	209004	182772	202959	718405	700816	670300	669929	692155	716653	676156	689611	246435	259245	227142	259523	243123	253559	229198	262742	516160
4.38333	814693	782206	760804	749445	792406	800571	760321	778222	999825	1000000	983808	976909	1000000	1000000	996291	1000000	288492	294376	266033	281074	276131	293075	266821	296077	193118	211252	178284	209139	192045	208995	186034	211468	718872	707363	669734	677536	696655	708216	684528	696422	243678	260914	230896	261146	241942	254542	230680	263455	518935
4.46667	811568	788735	761107	738869	801605	811088	760027	773029	1000000	1000000	984054	990441	1000000	1000000	985980	989921	282931	293489	265788	285311	277316	293360	268205	292490	193547	212762	178426	209927	192073	205813	184645	210249	720335	710979	673422	678329	698387	707615	679869	697549	250589	258699	233109	262081	246194	255423	230763	262278	523508
4.55	809563	793296	756778	741143	799585	796093	764537	778660	1000000	1000000	980250	989161	1000000	1000000	984364	1000000	284327	290482	264960	285051	279210	292284	265218	292813	191605	207631	182225	209719	187541	202976	184349	209605	716547	713318	674286	673050	703076	712348	687288	698821	245743	257617	229505	257507	239175	253216	234680	266508	527492
4.63333	818606	794739	755963	740519	802265	808117	761438	771320	1000000	1000000	988523	983759	1000000	1000000	985987	995892	286272	294978	268979	285594	274859	293684	264600	290526	191246	209949	181365	212397	188203	207961	186894	209905	711488	716772	673626	687549	705141	712137	688304	696813	248785	261404	233894	261857	241578	251449	231477	263185	530592
4.71667	813646	795941	761179	750589	797748	808424	772320	780171	999756	1000000	982084	980256	1000000	1000000	982844	996863	287374	294068	274356	282433	275976	294246	268631	297297	192839	212044	182222	212276	189205	209546	182281	210339	722045	715744	680849	683234	709570	716392	692821	701537	245946	258290	228963	263258	242393	252992	228714	261461	533314
4.8	820206	798700	762549	754899	810646	809237	757615	779108	1000000	1000000	983144	983463	1000000	1000000	989538	995750	290008	295023	266547	285174	275907	296420	266050	298362	190856	213949	181294	211553	189151	204725	183261	208201	725972	723602	684715	683345	707638	719014	687902	698407	245756	257646	235888	261972	241118	252782	232040	264586	538944
4.88333	820840	792955	766874	743059	801954	820921	773729	778896	1000000	1000000	984754	984334	1000000	1000000	979167	1000000	286623	296185	272009	278470	275988	294511	265759	291186	192588	211481	179820	206087	188140	205647	187604	209263	725604	723280	672489	692540	712674	718126	694172	700571	248893	259588	231512	261226	238754	252632	227465	266926	541405
4.96667	819418	794583	763849	746659	812034	812843	765381	777554	1000000	1000000	984074	983383	1000000	1000000	982840	998634	288414	292598	272892	285454	279581	295393	265093	298605	194121	211878	180226	211605	192762	208429	184386	211464	730272	713809	679875	689832	703865	729819	693124	703280	245023	259625	232399	260804	243723	255528	229277	263322	541235
5.05	816808	803328	775748	756336	814321	812664	766557	780772	1000000	1000000	986197	983845	1000000	1000000	988411	1000000	289756	293994	269367	284047	284109	291498	267846	296620	192678	209348	182490	209508	188584	206395	186063	210222	729098	721441	678707	699827	718671	721310	698015	711683	251415	255875	233837	260174	241257	254996	227768	261877	550056
5.13333	825587	797667	775364	760194	805755	818811	767422	781122	1000000	1000000	984753	984917	1000000	1000000	986587	998145	288476	295972	265440	286791	276101	289386	266459	296239	193406	212910	178204	210728	188506	205575	184369	214629	727067	729325	689546	698222	708495	724636	698205	707892	244282	256208	232600	260997	239307	252410	232170	264990	551137
5.21667	828475	806740	766465	754766	821844	810401	778106	784756	1000000	1000000	994063	982956	1000000	1000000	992820	1000000	288719	289868	269480	285196	276530	291685	269181	292972	193912	210005	182423	211354	192938	206293	184178	210286	734031	724496	689917	698260	717845	721423	696802	706163	245277	259153	231293	257536	242045	255427	233474	262907	552472
5.3	824306	801058	779345	761027	810580	809506	770198	781667	1000000	1000000	982336	989723	1000000	1000000	990434	998975	283844	289481	269417	284261	276055	291000	263556	296384	191481	205155	181858	213842	190743	208841	183385	209776	740153	730184	689523	702308	715201	728414	703296	706851	248494	258029	233982	262006	242529	252422	232491	263942	556365
5.38333	835696	800662	772612	757972	814989	809983	776495	789708	1000000	1000000	986454	986177	1000000	1000000	995355	1000000	280879	295191	270694	278342	278122	290494	261144	292624	193961	209474	176190	212975	192643	205174	183432	211135	739993	726340	693964	703594	718415	733416	701935	709058	248243	261318	231072	259170	240515	248987	234248	261755	558320
5.46667	831469	807715	772006	760325	811631	815855	780128	782520	1000000	1000000	983088	993896	1000000	1000000	994332	995764	284611	288339	268967	283428	277615	292140	263255	294599	195873	211536	180504	212005	188431	207870	181475	211443	738389	733542	691271	699554	720802	739025	702500	717914	245215	253223	227526	264161	243476	253436	232201	264381	562374
5.55	835293	804960	768045	755032	821005	822312	782463	791249	1000000	1000000	984762	983027	1000000	1000000	994040	1000000	281842	287552	268681	283231	277512	290881	262353	297380	195409	214640	179878	208244	189665	204802	183719	210096	737644	731745	688699	702325	719259	739499	700655	712469	241153	258017	229362	258216	243096	254141	230455	262829	562662
5.63333	840124	811429	776401	768703	816173	828478	780436	792642	998584	1000000	979842	991582	1000000	1000000	991248	989464	281807	291405	268992	284628	275149	286977	263937	289748	195483	209239	182670	209492	193418	204249	185119	210335	743570	734575	685150	704577	722050	724047	702105	718021	250374	257006	233435	262127	244086	250127	232624	265656	565440
5.71667	837590	817038	777131	759198	833138	820477	781274	785564	1000000	1000000	983543	988574	1000000	1000000	990529	1000000	284189	290053	268882	279655	276844	291725	262716	293129	191033	209900	181103	208777	189097	207419	186538	211969	743762	747419	690418	708968	718466	740715	706301	728394	244845	256234	234012	260598	239807	249904	235703	261425	572458
5.8	838676	814562	771085	762040	825057	825691	781545	784514	1000000	1000000	983809	984716	1000000	1000000	990882	992849	280430	288250	266887	282325	275291	288697	260380	295597	192279	208682	176912	208781	191611	208611	187071	210858	744904	741468	694905	705692	718856	732381	713983	725981	245078	257836	230572	262466	246516	252297	233121	261940	571522
5.88333	845720	813507	776618	766663	821662	823671	783280	793089	1000000	1000000	978561	993489	1000000	1000000	985909	996792	283075	287392	269129	278127	274483	288398	262148	295387	193800	211589	178802	209990	190991	205152	185943	213217	737612	743350	696168	716684	728712	734798	696507	724612	240600	254824	228255	259897	239674	248100	229227	266942	576132
5.96667	835179	809389	781130	766109	830281	821778	781723	793903	999739	1000000	991452	990999	1000000	1000000	976478	987214	286337	289148	267149	284173	275647	288498	264716	291619	190620	209210	181001	211685	189458	203812	184520	214770	745107	742920	702227	712238	730113	743728	710679	716273	243624	255944	233781	258789	241164	252129	226179	263690	572938
6.05	845358	812059	780396	763549	827684	822527	780542	797011	1000000	1000000	987280	991305	1000000	1000000	991442	998781	281019	289432	271641	283785	278539	295074	260319	295874	195102	209040	184601	209808	190410	205012	184627	211945	748152	734514	695643	709696	726197	745154	704230	716376	247102	256749	227249	261051	238024	253786	232513	267219	578398
6.13333	848254	816421	782181	763499	822937	830822	783620	790397	1000000	1000000	985189	986959	1000000	1000000	991456	1000000	288762	291843	266002	283853	275413	290577	261895	290920	194769	208914	180980	210437	191777	206701	184165	214232	750634	740615	699632	716460	739345	739358	705591	718754	246025	254971	228464	261682	241588	252045	229338	265581	576774
6.21667	844552	817682	780019	772215	826916	816383	789046	796037	998312	1000000	986001	982438	1000000	1000000	985894	1000000	281408	287113	268043	280477	276134	287006	259710	293824	190981	209801	182036	212239	190624	207285	184251	215491	751624	746867	697413	714429	731249	751751	719937	725993	241456	257120	229961	256913	241070	252976	229489	259047	585650
6.3	840425	812216	789028	766595	827724	823470	782722	803133	1000000	1000000	985401	978842	1000000	1000000	989992	995135	277282	290433	267570	281321	276032	288813	264638	292208	190753	213209	177782	210859	188993	199062	184168	216567	749253	750939	706742	721154	728321	744764	709878	732592	244363	256694	229965	260843	242240	249620	230531	268226	583992
6.38333	842691	817102	779981	770500	838067	829255	781705	797515	1000000	1000000	990941	978807	1000000	1000000	984400	1000000	280623	286646	263133	284054	274335	295223	258267	291489	192999	210951	180525	209325	190378	211744	180645	211018	750697	751253	707060	718220	735201	744286	708751	725967	241327	251998	231049	258497	240730	252034	226751	263402	588402
6.46667	842820	816081	778719	768716	836845	823055	787533	794526	1000000	1000000	987767	979664	1000000	1000000	986463	999323	280084	288314	264447	284370	277177	290786	264345	288417	193346	210562	178450	212541	187774	203111	184021	213308	761154	749029	706528	728023	734782	744939	711421	727078	242814	250840	228437	260238	236645	253401	233383	262018	585991
6.55	844812	813115	784387	772595	833196	831543	788252	786285	1000000	1000000	973422	977617	1000000	1000000	981663	995981	278542	285562	261743	280261	276370	288958	261691	292624	191374	210916	181242	210330	192416	207975	183433	210350	757153	751243	713648	725944	738495	747040	716366	730947	246884	255778	228560	256769	240004	249531	228332	261142	587112
6.63333	841912	818298	785247	768411	834042	831665	791988	801582	1000000	1000000	982811	981916	1000000	1000000	989579	1000000	278758	285627	262746	280698	275981	288376	258697	294093	192799	212396	176484	214285	189360	204951	185972	211689	751795	744093	707957	725867	734410	753333	715717	726770	243918	259558	227382	260399	240839	250027	224713	265138	594157
6.71667	849964	822219	788633	770108	838090	830786	788967	796987	1000000	1000000	989666	977786	1000000	1000000	991611	996090	279323	285747	263570	280685	268619	289905	259872	292470	193213	209764	179427	214356	189424	206712	184867	210511	762225	748782	705928	726272	736190	754383	719049	723435	241239	255215	232325	258844	240146	249126	229658	263161	592539
6.8	843153	819803	779292	768796	839621	833451	779527	804943	1000000	1000000	980279	987882	1000000	1000000	986239	995177	276339	287182	262409	283553	269295	285574	264809	292288	190466	210016	183650	211127	184364	204053	189007	210291	759868	752674	710007	724704	737804	750601	718811	732727	242045	255191	228312	257188	240089	246527	228144	262007	597793
6.88333	848183	821725	786971	771500	840448	841583	789422	798088	1000000	1000000	978588	988272	1000000	1000000	986199	997893	280372	287073	265853	278467	276378	288925	258224	290873	191255	208136	178363	212323	188979	201955	183276	213882	760989	751522	710170	722477	744239	759329	720651	722625	244552	252129	230694	261476	237135	246104	231935	259404	597296
6.96667	853600	826021	778686	770815	834663	834860	784081	803728	1000000	1000000	975021	981165	1000000	1000000	982307	999081	281823	286405	266670	277927	270977	288541	260243	292466	191351	210494	183848	213784	189930	207339	184399	210227	758082	752928	712355	729297	742417	759905	721583	731957	240070	251371	227134	258811	240864	248500	228710	264432	598944
7.05	847969	823015	784455	778674	835512	831193	785384	811947	1000000	1000000	984421	972538	1000000	1000000	994980	993228	272902	283999	265935	281694	272432	288012	258701	290601	189763	207566	178172	214477	191903	206818	187877	214768	771813	749514	708463	725255	734461	753154	727645	737581	241696	254576	229315	257379	240028	248904	230256	262528	602242
7.13333	847306	829670	783309	776885	844462	826368	786515	810753	996666	1000000	982906	977256	1000000	1000000	983227	992848	278412	284591	264536	278119	268404	285062	256802	291585	193526	207591	178802	212803	193550	204143	185377	213643	766257	745127	712868	728665	743901	757511	723364	731969	241506	249679	228877	257529	238135	252779	230649	261569	603137
7.21667	845030	825445	782869	769795	836195	829841	788584	799857	1000000	1000000	971315	973043	1000000	1000000	986097	992636	279120	284916	265952	278811	278789	284415	259208	288570	192094	209652	177795	213185	187609	204648	183708	209946	762709	755055	713991	723997	744244	749881	721427	727950	242419	248615	232445	253418	235488	248033	228613	261256	605088
7.3	849653	830615	788638	774586	848058	838982	794263	808493	1000000	1000000	974513	989301	1000000	1000000	987218	996071	276045	281176	265540	276651	274650	285068	263506	289923	191508	207802	182746	213423	189979	204635	182548	217421	766312	755997	711560	728750	749006	755372	726691	729993	242725	249054	227288	257833	239098	245234	229468	264538	602637
7.38333	850648	831786	789623	780803	830821	835030	795310	802722	1000000	1000000	973141	981884	1000000	1000000	992395	999828	275861	289060	264104	280156	273627	282999	261053	290050	190931	206977	177005	210430	187876	204652	188145	212117	764016	759646	712190	727303	741702	751415	722074	740927	241610	251044	229521	256927	238897	249383	229070	259989	602735
7.46667	843357	825321	783554	778557	847626	836107	795187	803651	1000000	1000000	983896	982330	1000000	1000000	984296	1000000	274057	285102	264647	277532	276636	286928	255969	291097	189487	208234	181276	210187	188587	206737	182247	212454	765459	757784	713205	728395	746594	759389	725898	739920	239599	249939	230376	257963	238462	244158	229555	260453	605412
7.55	847427	830513	778754	775334	834430	840569	792561	796944	1000000	1000000	987858	979613	1000000	1000000	983518	996989	278935	284510	262764	277606	271799	284854	260831	285613	189370	206081	179193	209241	189722	200574	185795	211426	764627	752526	715751	730649	746685	763661	734246	736303	236912	251223	227834	258432	234385	247217	226545	261021	605496
7.63333	848317	824932	787231	784171	840940	838886	786630	800814	1000000	1000000	979577	986675	1000000	1000000	988082	996480	277775	278535	263875	279612	269939	285145	258536	288241	193591	206480	179846	206167	185336	205632	183916	211084	775231	752206	713080	740515	744538	774003	727906	743801	238187	251849	224962	254793	240475	245275	227933	262506	606172
7.71667	848786	835519	790994	776345	848408	835819	786059	812217	1000000	1000000	969202	980726	1000000	1000000	975708	995393	280490	285268	260100	273456	272949	281762	259558	288867	191166	207063	182741	213465	186546	203649	182492	213207	770573	756230	720764	733742	749282	761460	723762	742765	243427	246869	227377	259062	239365	247631	231715	262788	606933
7.8	854907	832048	798390	778228	844768	839851	797465	802328	998261	1000000	979630	987266	999752	1000000	987184	997197	274419	280607	260599	273799	267526	287925	257332	287383	191882	209022	180021	210288	186901	201686	183280	207329	767779	759277	715911	728262	748706	763704	727583	739765	238912	250709	225474	256693	233653	243377	227932	254652	609400
7.88333	850307	822342	790382	778827	842450	837988	794669	806097	997022	1000000	976034	978175	1000000	1000000	986347	995196	274654	279138	259900	277068	272444	284774	257197	286077	192257	204367	179016	208870	188517	207564	184558	210795	776413	754715	721070	732086	752645	764684	725201	738700	239570	251861	227500	251074	234227	243637	224945	255915	612461
7.96667	850511	825777	789827	774563	835123	841555	787591	808331	998599	1000000	976282	985606	1000000	1000000	988841	990447	275352	279150	262516	275823	271528	278930	260162	284862	185868	206654	182259	209697	182379	199079	183568	208432	768611	761217	719360	745368	750450	758908	729497	743035	237577	249717	229263	256166	239022	243761	228103	260604	615154
8.05	856703	826220	789440	771335	849424	832628	798490	799664	998846	1000000	978541	977682	1000000	1000000	985117	984950	275709	280224	261823	277251	267227	277135	252499	285760	187400	204580	178800	211541	191749	204234	183042	211165	771069	753287	715477	740301	752944	762116	728859	741929	242281	250299	223524	253869	231908	243967	224008	255690	616624
8.13333	856557	830404	783983	781165	827078	837322	788710	803853	1000000	1000000	973012	980160	1000000	1000000	985635	985082	268614	283240	262788	272886	268310	283501	258728	282596	188715	207238	181568	210826	185470	200724	179848	209360	764962	766683	724937	735812	752471	761870	733612	744821	236825	248713	228754	252519	234547	242826	224992	258250	622944
8.21667	853741	831419	782067	789995	842144	837132	787494	811381	1000000	1000000	980591	976466	1000000	1000000	978731	998589	277414	278897	261086	275346	266495	282773	256878	284648	189927	203155	177720	209186	188793	203330	182487	211752	763963	763964	721110	731019	747324	767562	721785	745504	235465	248312	224238	257527	235974	241817	228112	259768	614863
8.3	845375	834994	788375	784364	843401	836291	792864	807563	997196	1000000	979006	973593	1000000	1000000	981950	994871	272852	280146	258996	269003	267380	280015	259796	285647	190531	203107	178507	209421	189357	204923	181667	208910	763587	759409	716160	738209	753818	760542	730042	748185	234904	246631	225997	253715	231928	239501	226412	257537	613820
8.38333	858484	837018	792181	789218	838127	836268	795610	801297	995909	1000000	979951	984811	1000000	1000000	981025	994667	272565	279572	260948	271815	270786	280256	254865	283439	184484	203849	177610	206942	185705	201860	182274	211052	780006	765211	728302	735440	749267	767866	729268	750881	237596	248248	221749	256294	235284	243123	226046	256358	613800
8.46667	846003	833818	793668	782360	841744	839369	786321	802919	993527	1000000	965167	985711	1000000	998888	974882	987524	275672	281989	260197	274302	264385	284104	255119	283970	189252	205826	174213	210056	183286	198906	183710	212972	774020	768135	717940	738058	755577	761270	733966	745865	238229	249683	227771	253852	233124	244057	225652	254671	618842
8.55	850500	831859	796758	783422	846334	838484	787473	812309	989795	1000000	975820	976323	1000000	1000000	975139	988384	274722	278945	252942	271614	270143	280802	253425	282756	189372	204582	179320	213888	189345	202670	178814	212557	772878	759709	719039	731475	756983	763736	731278	745730	236016	249696	220314	253475	236080	245474	221850	258719	620761
8.63333	850872	833969	789797	782606	842257	842315	793706	806711	994574	1000000	972876	972814	1000000	1000000	978305	987385	275128	279357	257770	271653	266128	279808	255443	279810	184738	206682	178544	212831	187208	201230	182272	209795	773088	763941	724478	737819	750504	765038	730911	746326	236148	245849	226109	251627	234054	244816	224448	257769	618819
8.71667	855302	842669	792902	773095	847288	844171	791658	806999	1000000	1000000	976217	972268	1000000	1000000	966250	991781	270966	279091	255162	270196	265071	281093	256275	281343	187924	201630	178269	209086	188225	198610	182803	211953	771783	768822	721932	737461	755763	767094	735539	753663	235669	248121	225290	251163	232165	241466	225007	253923	620484
8.8	847031	835061	796346	782248	843886	839555	791683	813002	993676	1000000	973409	981783	1000000	1000000	977704	987651	271992	277385	255359	278518	266416	276879	253155	286923	188996	204170	178693	206112	185541	202789	181502	209535	777194	762836	721093	738120	760993	771103	736205	754860	238045	243858	222296	253771	232411	242429	218609	253632	623351
8.88333	857042	835533	800118	781374	847157	842925	791643	817879	999654	1000000	973669	963749	1000000	1000000	975495	993172	266698	279458	261029	272104	265817	276850	253604	279616	186659	206878	175093	204133	185091	199369	182129	209843	774459	766718	720415	746226	758906	770444	732328	744280	233624	243674	225805	250166	233333	243932	224683	260819	621484
8.96667	856367	828879	797255	785689	848580	843155	796434	808575	985504	1000000	977171	971708	998237	996606	973984	984125	267202	273425	258829	272802	265698	277223	251739	281861	186056	204736	175803	206048	185912	201838	179454	210005	774238	764517	730567	743217	752832	770033	728784	742807	237587	247450	222418	251528	233828	241200	222304	257808	620348
9.05	841617	832463	791648	777078	846249	835370	791777	812977	988998	1000000	973135	981216	1000000	1000000	977307	988691	272110	275626	255321	275837	264913	275127	255400	280998	187165	202443	178457	206982	186891	200805	183222	211959	778818	767418	724046	747769	758237	766911	728082	748397	232320	247845	220798	251551	230034	244312	221329	257386	625773
9.13333	854800	833413	798947	785533	840508	845285	794754	809745	1000000	1000000	975131	978109	996738	1000000	970536	987491	272061	269643	256842	271483	268209	276774	250900	284139	185522	201447	178032	204097	184620	198306	180985	209170	778482	770891	727100	738154	753339	772600	735052	745694	236181	247898	228224	249554	231841	241361	224751	251123	619556
9.21667	848414	836283	795722	787722	847826	839960	798190	808647	997337	1000000	966915	977226	1000000	1000000	980382	995465	267208	270525	257189	275032	262291	278633	252735	284862	190436	201370	178225	208016	188097	198890	177832	207970	775466	773074	726598	741653	751112	772194	736441	748247	238243	251071	221208	252627	230819	238582	222407	253689	622631
9.3	840853	835982	795498	769499	848760	840602	798164	811508	993057	1000000	965299	987196	991300	1000000	969606	988916	264568	279769	254682	272925	261398	274801	252262	280460	185823	204133	178483	209412	186519	199073	181396	207164	772722	759463	724814	747037	756913	765458	733725	753465	238289	244609	224036	247060	231514	238906	223083	260068	628980
9.38333	851943	831394	795969	785283	841755	842308	784987	815777	994775	1000000	965865	971880	995246	1000000	967026	986405	269755	274995	260407	272736	259884	273638	251558	281566	186097	202484	174808	208859	183886	198737	179318	208896	775102	768023	729333	744365	757631	781734	736733	755593	235169	240899	222664	247869	232424	240223	225683	252049	627148
9.46667	853195	826835	797644	785976	847261	840414	793889	814011	991133	1000000	973948	973737	1000000	1000000	968868	990014	270331	274165	250566	271995	264110	273228	250857	276433	185596	200693	177491	208403	184433	197285	180929	206467	778104	762449	733701	751640	758761	773459	728889	752831	232691	242347	220988	249825	231097	241185	221857	251883	620850
9.55	852113	838078	797860	783600	852687	849155	789832	809119	987808	1000000	961699	976902	993959	999293	969369	986331	270158	271881	254076	267424	262963	277282	251643	279001	185463	202298	174515	208233	186287	198953	178368	209327	779924	770887	728152	746734	757045	782548	738589	755732	234219	241433	221039	247823	229073	237513	221038	250321	626456
9.63333	849423	840084	797368	778775	848331	835535	806534	804523	986000	1000000	963860	974086	997563	999322	974249	980504	267832	269834	254913	267028	261158	273388	252207	282567	186990	196790	176892	209695	183023	199504	181461	205406	775196	764121	723646	752757	763146	775768	742249	751864	233205	241659	223372	252782	228409	236474	223188	255868	625762
9.71667	842899	828356	800923	779838	844955	842080	799288	809037	986069	997300	968929	973365	993013	998275	976780	973862	269518	277309	253111	264164	262580	273518	252555	279342	186848	199878	176231	206268	186631	198379	180135	209323	772522	769822	727515	741319	769935	770984	733617	747132	233310	244353	223716	250777	231146	238969	221520	254637	626073
9.8	852571	829477	801275	789981	850437	836822	796580	812145	997176	1000000	969317	976193	997136	996712	968367	982248	266634	272695	255385	271777	262160	277629	249098	278817	188963	201563	178395	209494	185446	200004	178106	210127	780484	772128	736676	745140	758162	774683	735400	752468	233303	243475	225701	247617	230632	240422	221108	254996	631106
9.88333	852394	833747	795550	781930	839721	839099	802241	805790	988690	1000000	967355	968354	984390	1000000	971672	976549	265215	269932	255002	270360	262755	271047	248125	276436	184123	201025	179026	208164	183684	196243	179795	205517	776891	764655	730714	742156	758129	772522	736169	753758	232704	242269	219212	249280	227082	237572	222604	247942	628766
9.96667	852330	832628	792608	781403	837371	841781	799715	812943	984578	1000000	965621	976477	993633	996466	969332	980686	262723	271436	253511	272528	261628	274950	249232	281494	185902	200605	177805	209812	186549	197252	180591	208035	781606	771757	727261	749795	763366	772513	741263	752303	235521	239925	221591	247959	230517	240256	218720	254177	628256
10.05	849829	837294	798237	791650	847592	837820	799448	802593	979782	989022	967901	971179	983859	999033	964788	977556	266440	270777	252070	266387	262625	274341	249494	277388	184913	199273	175887	203122	182821	197476	179787	203644	776839	772595	725009	745050	760208	780854	740504	753098	234582	239439	222233	247327	229390	236104	220473	250991	626526
10.1333	845264	833229	787749	785763	849951	842185	805480	802827	984678	1000000	962134	972215	991363	995735	972665	994039	263309	275186	253695	266764	257646	271067	253093	274816	184706	202117	173415	204474	184061	196227	179700	207947	784249	771764	730365	741897	754371	776508	736175	757061	231919	239092	219450	247360	225334	234837	219817	252057	627050
10.2167	847209	836473	787784	780279	852741	842373	797359	815704	980572	1000000	962984	975973	996280	1000000	972440	981721	266811	274420	254564	263750	258901	273874	250425	278494	181494	199844	173089	208113	184611	196122	182997	204366	781212	767844	732744	751752	764131	774244	738448	754860	234041	240646	214142	244705	225135	234779	218322	249176	634131
10.3	845467	831588	796911	780830	853977	836221	792487	810970	975846	994878	968477	974665	1000000	990700	960837	976033	270565	267715	254696	268779	258771	269033	246558	276605	187322	200771	174944	209649	182356	200442	178545	206384	782079	770349	733527	747627	758397	778697	745395	749661	231275	242053	220060	248196	229049	238464	219900	248529	630603
10.3833	841754	831196	796351	778119	842135	840036	799309	809721	975423	997088	968248	971776	994287	987266	965580	971695	264295	270445	248579	266969	261583	273612	247515	276643	187517	199543	177831	204151	183231	197596	181887	204430	775780	766541	729556	744574	760978	777548	729299	761029	231478	239942	216292	249026	224719	229523	215427	252551	629484
10.4667	844033	834124	793198	777499	841810	838659	795658	806376	989184	998897	958732	969092	991713	991345	971620	970904	269592	268595	246426	262204	258352	269141	245980	279330	180817	197732	175635	207999	183077	197756	178762	204964	779631	765080	730824	755464	752955	778781	727806	746582	228849	241768	218539	246295	227721	238389	218011	246921	632598
10.55	848883	837073	793256	778833	834133	843188	797478	818207	973895	1000000	958674	974073	987873	994423	961731	982883	265008	270960	247784	263027	258477	270719	247921	277712	185806	197526	173952	203699	183266	196313	178147	207488	777389	773680	735792	745849	758635	781165	734823	755810	228508	240611	215624	243239	225634	234266	219376	248289	630326
10.6333	847019	835196	798632	783424	849750	841358	796124	817362	975952	994585	959310	969068	987080	988792	960620	973842	260501	270667	252958	268190	255762	272484	246922	277427	179282	198956	174277	208251	179147	195433	175678	205162	779667	768415	732553	743926	757539	777811	738744	752742	231040	243194	216057	244158	225164	233950	218210	248905	627048
10.7167	846969	829816	798913	786699	840978	839808	791006	810657	975143	993106	963305	964804	990336	986822	958030	978060	262331	268436	252119	264244	256335	271705	245767	274723	182579	196821	173079	207710	184278	198348	180408	206800	780738	769258	728739	753962	763401	776421	737000	759862	225965	235110	218395	244571	228000	233519	218479	246998	630708
10.8	847147	837932	788336	787425	848745	840323	798567	821919	979480	1000000	955717	969494	984881	989047	961280	974028	264659	264998	246112	267531	254592	267432	244982	274211	181315	198687	172494	204472	185977	194853	174516	207780	788456	768968	730536	751317	760767	774061	732925	757808	230462	241334	219884	247471	224655	233724	220542	248790	629234
10.8833	849816	829134	787878	782223	847617	841584	794447	810185	980408	999844	953769	967432	988854	993269	962679	974779	256771	269098	253250	260674	257273	271807	244223	274292	180620	194930	171493	201928	183813	194898	178163	206754	783028	771529	730478	741991	766607	782354	735880	759719	228695	240132	217150	246970	223422	233609	216753	244724	632154
10.9667	846636	838167	786548	781090	844558	835663	799580	811207	983759	992155	959482	964578	984691	985449	966527	966099	261860	266895	249870	263367	255318	266663	246906	274833	183572	199795	172863	201159	180451	193478	177137	205414	784055	774088	730886	746258	760173	781901	736385	760944	230442	235877	218317	246222	227244	231696	218762	248257	628947
11.05	847380	833213	782931	782674	844693	834646	796410	812344	981064	991006	950371	974203	984902	988980	962043	969363	265599	263124	246966	264487	257324	267567	246928	270904	183948	194890	172939	203392	177926	193406	178452	204714	781576	766576	730449	749923	763820	774930	736486	757751	227928	235219	220525	240426	220722	228913	214819	248458	628657
11.1333	846430	835192	788582	776334	844409	833449	796439	809954	974107	990806	954680	960065	987366	985264	949103	968298	259842	264382	249698	264997	258470	266756	245360	273650	180867	201133	173674	201566	179466	195819	177057	202348	782563	766600	733751	747917	759028	773738	744151	749098	225804	233760	218124	243450	225624	231562	217315	248445	632942
11.2167	835791	833831	788598	783231	838102	835267	785601	810236	968293	989323	956896	964996	983360	990151	957374	975735	262193	264707	248595	260933	252716	267707	246702	271801	184652	195745	169715	203277	182340	193040	179283	204406	781287	771075	727936	752440	754394	781226	736011	756237	226874	235809	215033	241488	225044	232224	215749	243733	633619
11.3	846039	833757	788314	778905	842435	828429	796470	808824	978425	992276	951820	959870	970762	988576	959943	971624	258949	264998	251373	261897	253181	264481	243810	276704	184650	197688	171885	205415	178400	194618	176445	206605	782535	771257	728344	742280	768350	778294	740648	760612	227142	237825	217811	240402	224676	228593	216094	248515	630325
11.3833	847578	838277	794928	785609	848455	834867	794319	812888	979409	995397	956544	970607	983209	984098	960445	966367	256032	265298	247670	260300	255814	263499	243695	272224	182227	192855	174520	201541	180246	193700	173532	205013	782773	773053	727287	744847	759668	776256	736797	748573	229564	235147	215824	242163	226192	231593	215845	249295	631095
11.4667	841299	833171	791002	782900	843803	828944	791679	812305	969472	979138	950085	964779	980782	983378	948704	965987	259193	265058	246807	261908	250351	264590	244004	272229	179121	192505	172263	205346	182355	193902	175369	201137	785473	771725	726731	744605	758766	773227	740074	752795	224333	236234	215094	242202	221412	228186	214529	244842	629124
11.55	849420	838989	781184	784545	839281	829190	797259	807907	980421	996209	951488	956958	982917	981051	958510	964974	256350	260861	250178	261458	251811	265417	243266	268328	179532	196030	170551	206032	178390	195330	176262	205807	781315	784146	737118	744276	757431	773638	744187	751904	225350	234072	215314	244488	225800	228058	217240	246719	631305
11.6333	847992	829281	786166	790851	830377	830968	790635	815245	964016	989255	945122	958025	980631	976207	962006	964755	256621	263874	246324	261965	256945	266380	245726	269178	183354	192815	172333	204457	181056	192663	171988	203068	777914	780712	739322	746382	758360	780666	738041	752534	226936	236711	214927	240326	222544	228555	218374	247515	630840
11.7167	843519	830826	789915	784395	844280	832566	785637	818148	972160	988868	951018	962342	981726	979908	957858	965062	255924	259496	244836	262519	255583	264570	243839	270713	179544	195205	174694	201425	178940	191738	175192	205304	778618	772409	732789	751259	763349	777672	739139	757081	229580	232569	216251	238719	223498	232192	212227	245906	631994
11.8	847400	836367	786025	786835	846716	840297	786041	809219	984009	985614	952239	964919	982101	976084	959410	969554	255854	263352	245433	260855	254611	261694	245618	270248	181274	193927	169551	199047	179792	190804	173172	203661	772673	771883	735893	752021	757870	775374	743782	760149	229521	233943	216136	237960	220324	230849	212318	244463	634064
11.8833	847565	836880	788645	781978	845287	834623	793676	809960	968077	981811	943132	964093	983963	985098	956017	962372	256713	265643	246094	258586	250491	264752	237508	268152	179972	192645	171517	202619	180148	196301	175700	198953	785060	774725	726845	753512	757240	774266	742575	758959	225652	234009	216873	241712	226243	227091	213185	246446	627610
11.9667	848212	830532	783851	781198	835844	825058	786957	815317	981326	981628	937561	957783	981111	981823	945786	966104	257328	260443	247142	258610	256365	259518	242293	267313	178276	195137	171510	200585	178638	192271	176132	200910	776231	771991	733287	751391	763680	770785	735022	756220	226497	230584	213177	238773	226851	229866	211799	242437	629032
12.05	837685	826090	782692	782920	843279	844173	791711	810144									254775	259772	251081	260384	246981	260452	241558	268867	179277	191611	170192	200715	180683	193666	175673	205432	786925	770149	721966	747268	754393	773290	736421	757457	226513	232329	215730	239731	224130	229951	212718	245819	630077
12.1333	846410	835039	778739	777985	838761	837672	789176	803558									259672	259081	243071	256458	250546	262786	242280	267593	180926	195339	167728	198795	175781	190232	174494	204096	785226	769736	733539	750155	760373	772169	740840	765388	221823	229511	214086	238872	219209	224040	219593	244790	634738
12.2167	840461	831114	781983	787014	847366	837173	789154	806507																	180569	197582	169611	201155	176454	190098	173718	200139	780227	775679	737298	760977	761616	775621	737724	755991	224091	234100	212182	240737	221954	225371	211007	238943	629126
12.3	842618	830681	790591	782520	841507	831721	788344	807929																	178828	189707	167609	201634	177370	193043	171689	202635	781951	770804	731147	751225	761116	772205	738982	757675	221253	233991	214204	240034	219035	229885	214396	239475	634344
12.3833	842561	825763	789289	776065	839768	828893	787390	801802																	181189	191317	169233	204464	176296	190354	175123	201901	774203	771082	739223	745385	763920	789998	736884	756382	225221	235363	214445	237694	220542	227885	210676	242693	635522
12.4667	842585	824923	789266	781689	839291	834651	782110	805880																	176579	197037	170586	200786	174132	190471	172085	203339	782123	770814	733195	746852	760396	771282	731672	756625	226512	232552	211915	235935	219350	226171	212183	239989	633876
12.55	845039	835458	784839	776963	848425	829743	784223	804476																	179632	190742	167793	198174	178599	191859	174102	202053	776874	771129	734901	747536	756799	785636	739273	758836	221012	231982	210026	237270	224945	229144	215619	239979	628050
12.6333	836811	830550	788730	779760	844350	829845	784244	807753																	178857	189767	169024	199236	177657	188267	171707	199641	780724	772382	734977	746461	759990	770340	728752	756947	222938	227955	214292	232708	223176	221673	213005	242476	631003
12.7167	842336	822715	791869	777547	839427	827914	786701	806461																	176594	189453	169846	199408	177003	190760	172711	200553	779521	764392	731676	752850	762311	773844	736366	752828	226731	229489	208559	236241	217108	229931	213721	237716	630886
12.8	834570	825389	777987	777531	840173	832927	791655	810274																	179188	192532	168166	199922	173374	188421	168971	198975	778721	766286	730487	749184	755843	777188	735656	759499	221010	229195	210647	236609	215098	228248	205298	237817	628696
12.8833	839515	823640	779605	779402	837527	830592	781794	809067																	174431	188535	168311	199176	177004	190863	172732	200373	782476	768505	729832	747440	761480	778271	737995	757285	223744	230871	209970	237758	220517	225337	211007	239256	630080
12.9667	836466	826015	775293	772097	843527	828521	786386	806384																	177396	187067	168382	197834	178022	188445	173207	200355	772851	767886	732064	744621	766506	772128	739175	750421	220416	228838	207175	236808	216662	222598	214332	238635	623868
13.05	842883	821715	774412	777171	838938	827777	779998	808643																	178344	188625	171002	196997	176457	188200	169438	202777	776211	761883	731708	745240	763162	777967	728785	755937	219758	227505	208303	235924	220454	224757	208496	237390	633290
13.1333	831710	823679	779061	782780	841166	822697	785211	817465																	174741	188530	167282	196481	177712	190771	170111	199325	779686	765739	731057	751596	758467	772808	741580	756422	221921	227437	212285	238220	220383	226274	212358	237934	631586
13.2167	837464	831002	769953	770463	844600	831059	791288	806995																	174980	192148	168471	197139	176246	185814	172409	196484	778066	765580	736879	745200	756263	767441	742415	761479	222311	227027	210096	235717	216861	223586	209601	235386	633571
13.3	839455	827852	777062	777363	834947	823035	783938	812460																	174474	191961	169052	194194	173717	187278	171093	198719	779405	768818	729713	750757	768248	772977	738634	761145	219536	227756	207662	237150	214870	223016	207268	237022	631266
13.3833	837676	826372	782876	771334	842445	830515	784105	812248																	174830	191910	169392	193087	177419	184750	171984	196424	779606	771329	726825	742632	761266	771657	744934	754556	217020	226602	209850	236795	217857	223782	207484	238480	629044
13.4667	835380	818668	768601	782925	836280	825915	790755	810472																	178083	189677	166972	194716	172906	188547	169446	192651	781819	770455	727595	753614	761881	772079	730950	750233	219935	228811	210719	234612	214058	222452	206625	237307	627568
13.55	832430	823541	780139	769293	835971	818579	779407	812261																	173344	186450	166814	191483	177734	188579	171706	198457	780695	760347	736142	746075	768895	773605	736809	756597	220234	226747	207017	233711	217874	218601	209619	238356	628164
13.6333	837164	825393	776607	773533	839633	825822	787639	803658																	174330	189166	167196	194945	176662	187159	173223	197868	782379	765677	731917	746500	756783	777200	736260	758109	217040	226676	208734	235714	215050	221487	207909	233447	632954
13.7167	831821	825589	787027	775276	838200	817503	782090	810109																	173454	186396	167228	193382	174301	185458	171288	197139	773447	768182	726504	744204	763111	770325	737087	752244	218698	225798	209087	233404	218165	223127	208375	233831	627324
13.8	830590	827328	778536	792359	836608	825772	787381	798254																	173704	188215	169096	194391	175980	188706	172072	195633	782520	769647	739183	746950	756278	767084	727663	752740	217964	228266	207669	232444	213623	220009	207690	233714	627573
13.8833	824656	828558	778861	777077	835178	819700	789687	806312																	172712	188289	164762	196083	171090	185150	172047	192857	775357	766344	734933	744180	757631	773258	735829	756773	215198	223521	205936	235692	215819	221372	207559	233934	628197
13.9667	837974	821322	776224	764486	834002	823699	787557	806898																	175674	186673	164077	196013	171865	184717	172082	195552	776936	765105	731327	738805	756469	767392	739886	761548	217997	224855	210724	232026	214513	225168	209546	235870	630954
14.05	831870	820187	775337	773847	834832	823113	779923	803009																									776350	765113	728261	750661	758422	763744	736389	753888	216280	222006	210913	232420	210517	222513	209214	234984	626413
14.1333	822679	818549	771538	783633	835190	816150	781104	801279																									777880	764134	732963	748897	757896	771824	742846	759426	215979	223422	205501	229275	212543	221257	208809	237078	626388
14.2167	831254	823303	777563	770516	839984	814313	781797	805004																									775926	768356	728235	747268	761662	772152	732521	753697	217781	224907	205577	230516	214049	220275	207625	233531	631256
14.3	837927	820923	775155	779712	834150	814117	773417	798079																									772243	761763	723520	743641	759104	773245	727737	755337	213559	226315	206130	230013	213363	214728	206977	235991	626761
14.3833	831260	824763	767310	775211	832275	820304	786464	804576																									767723	765354	726406	747893	760405	770620	736052	754221	214517	224038	207948	232366	211910	220540	205518	228463	628470
14.4667	827498	826636	767525	775754	829109	827171	776230	805369																									769858	763549	726107	756785	762138	772522	733420	755146	216655	222880	205263	229704	212866	219726	205610	229308	630796
14.55	823064	822248	770775	771680	828077	821836	777726	800482																									771818	757474	730443	744277	759478	768364	729673	754102	215594	220077	200440	228491	211397	217204	203154	233490	624062
14.6333	823586	818068	780904	769508	830815	823759	780289	796483																									767345	766999	734482	748681	760453	773379	730821	756345	216837	221865	207422	227595	212684	219127	208967	235082	628048
14.7167	834693	810644	772151	772397	835482	820746	776996	803823																									770652	762342	723779	742093	758507	771075	728735	746557	212314	221358	204480	225686	213101	216950	207509	233813	631027
14.8																																	774607	763093	724547	742839	761258	765685	731471	745016	215160	223939	205557	229481	209105	216102	199198	231810	624503
14.8833																																	779986	756237	730854	747134	764566	762051	732832	758708	209436	221868	205002	227793	213333	217393	207002	234986	624701
14.9667																																	771333	758642	727512	743234	754825	766765	733817	743032	215498	218599	203105	224760	210427	214735	202572	233117	626631
15.05																																	774019	764257	723285	743462	758325	762999	731697	749721	212389	220833	201734	226946	210957	214186	203764	234540	624860
15.1333																																	773179	756257	722756	744069	750412	764095	733268	749495	209758	216965	202537	228844	209939	215252	204264	228710	621365
15.2167																																	776725	756439	728390	751850	761401	754633	737483	753748	215914	217736	204259	224249	210793	214585	203491	230350	626187
15.3																																	768124	760273	724061	751190	762607	765480	730267	744249	215279	218595	204098	223152	210418	213558	202127	232007	622858
15.3833																																	770160	763474	717415	739583	753421	765522	733780	755698	210938	216801	202824	225904	211294	216497	200761	228077	624777
15.4667																																	770795	757644	728661	742811	763720	758365	727858	749707	211647	221122	203474	227399	207171	215622	201531	228714	619912
15.55																																	774885	755117	725438	734514	760762	762829	733681	749099	212857	219766	198473	223527	208640	213221	203684	229851	620320
15.6333																																	765727	756469	724145	743722	761845	765292	734474	747812	209227	218037	203556	223935	209973	213534	203161	224508	620178
15.7167																																									213331	218363	204353	223745	209892	216512	199380	225856	622808
15.8																																									213806	216695	202489	224555	208857	211785	198867	228016	624216
15.8833																																									210691	218619	203623	228702	206254	212749	199082	229538	625104
15.9667																																									208922	217278	202645	224324	209325	211291	198777	227907	620710
16.05																																									206701	215744	199746	224378	209191	208288	201187	225971	617470
16.1333																																									210219	218498	197378	221531	210168	213332	198311	225983	621076
16.2167																																									208570	218385	201643	220076	208446	210843	199703	222220	616060
16.3																																									205769	212893	198337	218752	208265	213433	199954	228641	622268
16.3833																																									209233	213724	196424	223862	207194	214128	201030	224660
16.4667																																									210119	214031	199555	224035	207844	211756	199303	222791
16.55																																									208428	213226	201388	220161	205989	209910	199821	220013
16.6333																																									207564	209797	200139	223997	205750	211709	198342	221985
16.7167																																									207712	216378	196043	221768	202341	214151	198263	223970
16.8																																									208208	217579	199272	217926	208185	207671	200156	224771
16.8833																																									206912	217576	195985	220239	202128	208276	198886	225810
16.9667																																									205698	209167	196420	222549	201959	208045	197029	220599
17.05																																									204921	212691	195972	221729	199884	209119	200314	222140
17.1333																																									204179	212320	195213	217187	205006	207636	196109	218486
17.2167																																									205845	211499	194998	218705	202586	209208	197222	218019
17.3																																									205811	209744	195918	212311	198582	208459	197914	221712
17.3833																																									206826	214140	196022	218154	203554	204897	199248	219415
17.4667																																									204015	207471	194547	219775	202202	204352	195428	221854
17.55																																									206888	212467	194183	214828	201245	205411	194881	218484
17.6333																																									198565	212683	195175	214930	200445	203382	193236	225046
17.7167																																									202716	211248	195346	219003	201003	205276	194341	218977
17.8																																									201003	208745	193597	217914	201590	204952	193532	219605
17.8833																																									203613	208385	196260	218052	198147	205415	195583	218557
17.9667																																									198390	205242	196545	213722	197763	204738	193789	216783
18.05																																									200570	208476	191780	215687	197826	201150	197761	217960
18.1333																																									196640	212660	192901	212983	199011	203940	190551	217673
18.2167																																									205146	209003	193501	216663	197120	204071	193500	215997
18.3																																									202942	209612	190985	213623	200533	202118	193272	217137
18.3833																																									201265	211148	194695	210126	195558	201380	187826	218648
18.4667																																									199496	208176	192712	215085	196034	202264	191908	213321
18.55																																									197499	207861	191138	213573	197649	201802	191895	215142
18.6333																																									198853	203962	190987	215855	199464	198074	194261	212570
18.7167																																									198856	209592	188583	211557	199496	202520	189344	218067
18.8																																									201434	209664	192544	212741	195788	201463	191378	213598
18.8833																																									196631	203304	188108	216365	197180	204399	189931	215656
18.9667																																									198064	206391	195200	213070	195772	203087	190456	213058
19.05																																									199080	206525	192856	210763	193470	202743	192864	212341
19.1333																																									199085	206915	189946	212390	196560	200830	187441	216737
19.2167																																									199258	203183	190470	211438	196514	200299	190627	210997
19.3																																									196334	206333	191421	209974	198435	197483	191850	214416
19.3833																																									197182	204034	187131	208421	192902	197400	190084	211483
19.4667																																									197415	201263	190321	209670	192470	198888	190868	210819
19.55																																									194198	204695	189386	212220	197677	201480	189990	211767
19.6333																																									198103	206167	186283	211170	195355	194684	187894	209235
19.7167																																									195685	202589	187427	204443	194626	201793	187884	209130
19.8
19.8833
19.9667
20.05
20.1333
20.2167
20.3
20.3833
20.4667
20.55
20.6333
20.7167
20.8
20.8833
20.9667
21.05
21.1333
21.2167
21.3
21.3833
21.4667
21.55
21.6333
21.7167
21.8
21.8833
21.9667
[truncated: 2 more columns]
