# Supplementary material for: Rate-limiting transport of positively charged arginine residues through the Sec-machinery is integral to the mechanism of protein secretion
Source: eLife. 2022 Apr 29;11:e77586. doi: 10.7554/eLife.77586 (PMC9110029; doi:10.7554/eLife.77586)
Supplement: Figure 6—source data 2. [file elife-77586-fig6-data2.xlsx]

## Sheet: Sheet1
Sample	psi	psi	psi	ph	ph	ph	PMF	PMF	PMF
pBAD cells	37.7631	40.1226	44.1362	85.2652	83.8816	90.2398	123.028	124.004	134.376
pSEC cells	39.1579	29.8776	29.3725	84.5394	82.8885	74.9294	123.697	112.766	104.302
pBAD IMV	1.35	45.69	39.56	43.127	58.865	54.595	64.843	64.05	64.538
pSEC IMV	46.55	45.417	7.12	68.4382	70.7662	73.3826	75.7408	74.7313	76.5579
