# Supplementary material for: Rate-limiting transport of positively charged arginine residues through the Sec-machinery is integral to the mechanism of protein secretion
Source: eLife. 2022 Apr 29;11:e77586. doi: 10.7554/eLife.77586 (PMC9110029; doi:10.7554/eLife.77586)
Supplement: Figure 6—source data 3. [file elife-77586-fig6-data3.xlsx]

## Sheet: Sheet1
	pH 8	pH 8	pH 8	pH 8	pH 8	pH 8	pH 8	pH 8	pH 8	pH 8	pH 8	pH 8	pH 7	pH 7	pH 7	pH 7	pH 7	pH 7	pH 7	pH 7	pH 6	pH 6	pH 6	pH 6	pH 6	pH 6	pH 6	pH 6	pH 6	pH 6	pH 6	pH 6
time from injection (min)	LDDD	DLDD	DDLD	DDDL	LDDD	DLDD	DDLD	DDDL	LDDD	DLDD	DDLD	DDDL	LDDD	DLDD	DDLD	DDDL	LDDD	DLDD	DDLD	DDDL	LDDD	DLDD	DDLD	DDDL	LDDD	DLDD	DDLD	DDDL	LDDD	DLDD	DDLD	DDDL
-8.1	68407	87707	86385	74132	42087	57847	70327	67037	24837	75341	111472	76922	21024	16225	39430	27916	13038	22224	28170	20941	8563	10866	15755	12009	8123	7449	12176	8348	5766	6890	9620	7458
-8.01667	73211	90686	92957	79155	46873	61055	74022	70195	31604	78173	115611	81463	22573	17890	41012	29039	14753	23800	30103	22699	9070	11036	16316	12164	8606	7977	13574	8995	6345	6734	10352	7798
-7.93333	77374	94118	98072	83787	49847	62622	76881	72497	37414	81759	117573	85344	24107	19396	41976	30286	15735	24863	31380	23541	9552	11490	16322	12335	9149	8526	13622	9383	6876	7267	10858	8363
-7.85	81789	96591	102674	87144	53253	65032	79192	75243	41756	84749	116559	88506	25139	20050	43487	31502	16694	25851	33112	25190	9789	11682	16655	12540	9577	8828	14135	9958	7294	7750	11295	8823
-7.76667	85202	98293	106164	90437	55837	67169	81874	77264	45960	87378	123297	90169	26281	21285	44768	32891	18121	26801	34427	26546	10070	12130	16860	12723	9925	9477	14483	10583	7800	8281	11141	9141
-7.68333	88077	100705	105282	93520	58750	69057	83513	78888	49749	88984	119594	93017	27474	22377	45591	34279	19036	28298	35395	27805	10534	12258	17011	13137	10314	9427	14878	10943	7845	8381	11792	9472
-7.6	91522	102214	110015	96831	60305	70460	84665	80389	53241	90571	120536	96154	28443	23133	46421	35365	19863	28991	36976	28334	10900	12668	17445	13405	10660	10022	15482	11188	8178	8695	12313	9913
-7.51667	93932	104648	112148	99433	62068	72079	86610	82146	56504	93388	126133	97337	29574	24411	47598	36487	20816	29891	38057	29695	11193	12775	17255	13696	10937	10098	15742	11741	8751	9019	12644	10647
-7.43333	96226	105178	113306	101251	64407	73624	87655	82970	58751	95100	126988	99831	30346	25317	48666	36955	21460	30352	38525	30372	11539	12760	17796	13900	11439	10760	15859	12032	8923	8976	12865	10525
-7.35	98114	108344	114899	103392	66430	75599	89905	84782	60743	96223	128601	101452	31240	25949	49129	38076	22583	31310	39938	31947	11666	13420	18198	14196	11437	10876	16388	12340	9284	9463	13272	10938
-7.26667	100394	109357	117431	104788	67133	76876	90907	86246	63121	97379	131081	102653	32357	27148	49707	39458	23192	31633	40516	32812	12277	13625	18142	13941	12159	11254	16576	12988	9602	9711	13705	11502
-7.18333	102301	110897	117015	106838	69435	77555	92462	87550	66277	98915	125618	103364	33183	27978	50964	40181	23905	32604	41775	33237	12185	13782	18843	14569	12352	11629	16774	13177	9695	9960	13845	11609
-7.1	104192	107520	116497	104651	69940	79283	92837	88501	67670	99501	130367	106319	34199	28055	52097	40026	24680	33121	42092	33859	12544	13805	18980	15042	12639	11723	17332	13346	10122	10355	13865	11560
-7.01667	105475	111814	121290	112130	71344	79763	94179	89781	68770	101044	128051	107881	34852	29316	51931	42162	25316	34086	42650	34547	12524	13972	19344	15110	12848	12166	17522	13602	10144	10429	14607	11974
-6.93333	106380	109854	122991	110334	72999	80525	94671	90541	71709	102054	133310	107472	35531	29781	52989	42246	25964	34359	43442	35495	12838	14417	19451	15218	13364	12402	17814	13901	10449	10565	14644	12325
-6.85	107305	112305	124845	111138	73777	82210	95339	91481	72883	102468	130932	110512	36366	30774	54058	43139	26753	35257	44319	36270	13007	14509	19347	15539	13126	12805	17632	14379	10678	10924	14689	12504
-6.76667	109269	113604	125465	115342	74634	82854	96534	93640	74126	103809	133404	108696	36939	31582	54190	43956	27075	35935	45319	37092	13541	14777	20004	15804	13642	12791	18428	14313	11247	11048	15134	13089
-6.68333	109886	118380	128386	114548	76039	84215	97279	93007	76298	105460	136001	109411	37752	32257	54801	43672	27989	36544	45835	37526	13518	15142	19755	15765	14015	13073	18401	14923	11298	11218	15392	13244
-6.6	109432	116963	125413	114866	76585	84790	98635	94870	77135	105829	130804	111506	38783	32049	55407	44777	28519	36771	46209	37917	14065	14935	19887	15789	14224	13413	18726	15084	11490	11682	15476	13376
-6.51667	113213	120379	126949	116654	77850	85852	98409	94761	78249	105283	132508	112682	39009	33264	55389	45676	29286	37772	46523	38816	14104	15260	20172	16354	14161	13547	18750	15321	11748	11664	16012	13637
-6.43333	114087	114205	130900	119690	78902	86955	99606	96565	79937	107866	130836	114137	39408	33831	56116	45740	29919	38235	47452	39541	14303	15565	20250	16538	14918	13416	18710	15608	11725	11882	16312	13612
-6.35	117804	118332	128942	121008	79339	86919	99927	96356	80704	106123	131712	113678	40118	34749	56944	47188	29960	38448	47797	39737	14469	15661	20494	16845	15171	13986	19158	15960	12187	12387	16133	14139
-6.26667	113628	120242	130161	122366	79216	88394	100346	96686	82426	105557	135315	114871	40946	34849	57542	47176	30655	38736	48053	40585	14605	15879	20543	16631	14711	14004	19169	15946	12378	12579	16258	14870
-6.18333	115561	119178	128620	118544	80190	89649	101502	97791	82769	107927	133556	115932	41365	35561	58430	47655	31590	39461	49165	40637	14870	16093	21011	17251	15388	14549	19707	16130	12424	12429	16411	14714
-6.1	118410	120749	131267	119381	81236	90865	101956	97943	83534	107804	133662	116227	41682	35655	58908	48130	32068	39795	49181	41466	15145	16391	21157	16836	15552	14392	19976	16633	12883	12541	17117	15192
-6.01667	121381	123371	131230	119291	82321	89639	103362	98534	83986	108212	132805	115591	42627	36402	59864	49320	32368	40060	50565	42479	15297	16130	21014	17485	15687	14726	20120	16459	13005	12859	16869	14955
-5.93333	117245	119137	131031	125201	82965	90408	103872	100150	85759	111374	134466	115645	43315	37182	60420	49550	32872	40171	49925	42414	15451	16636	21308	17530	15943	15377	19846	16980	13428	13151	17054	14981
-5.85	120777	120594	131061	127324	84022	90656	103832	100708	87203	112060	134794	119087	43442	37641	60557	49708	33057	41383	50706	42764	15576	16455	21307	17200	16017	15341	20225	17192	13730	13235	17343	15541
-5.76667	120060	122981	133441	124451	83822	92707	103982	100637	87962	113188	133659	120080	43566	37689	60104	50252	34131	41372	51377	43814	16046	16780	21595	17513	16258	15391	20404	17454	13690	13342	17522	15632
-5.68333	122858	128266	133422	126782	84417	92293	104529	101806	88144	112015	136119	118837	44137	38339	61157	50599	34320	42901	51366	44456	16142	17168	21863	17886	16423	15788	20805	17490	13965	13442	17652	15924
-5.6	122008	122626	136481	125776	85672	93101	104510	100936	88351	107922	135266	118148	44945	38700	61090	50762	34859	42229	52177	44539	15910	17179	21900	18473	16443	15553	20921	18041	13947	13914	18273	15891
-5.51667	123012	124045	132724	127419	86007	94206	105225	102339	89475	112212	135836	121669	45297	39577	62345	51826	35255	42821	52393	45406	16202	17089	22414	18071	16475	15763	20549	17573	14092	14008	18428	16418
-5.43333	122964	126158	134561	128636	85889	93782	105636	102618	90201	112752	135677	120354	46207	39733	62427	52085	35628	43425	51934	45689	16108	17557	22530	18573	16741	16221	21012	17994	14059	14023	18227	16361
-5.35	126287	128605	133950	125298	86629	95061	105047	102310	91250	111451	135809	121245	46806	40405	62993	53029	35967	43394	52983	46030	16693	17438	22240	18565	17230	16283	21018	18196	14657	14343	18667	16729
-5.26667	129700	126644	134848	128898	86581	95494	105343	103706	91089	112506	137479	120591	46846	40312	63219	53608	36052	43897	53768	46345	16752	17761	22047	18609	17187	16655	21068	18396	14680	14609	18663	16822
-5.18333	125679	125825	135946	127465	87007	95697	105151	104481	93032	113901	138615	121239	47388	41404	63694	53239	37159	44375	53964	46656	16722	18102	22651	18759	17378	16596	21416	18731	14828	14332	18922	17007
-5.1	126649	127328	131921	127198	88361	95983	106423	104628	92991	114339	137151	116907	47573	42060	63618	53988	37280	45052	54171	46803	16793	18289	22484	18762	17674	16799	21517	18893	15050	14768	18904	17328
-5.01667	125665	128797	136562	127880	89135	96647	106805	104855	93591	112726	134709	118908	48354	42138	64523	54613	36982	44735	55208	47700	17300	17803	22783	18904	17858	16989	21870	18797	14767	14824	18799	16973
-4.93333	130009	130431	139239	129286	88368	96641	105911	104819	94032	114282	138336	123821	48432	42407	64983	53888	37795	45289	55204	48236	17498	18317	22759	19251	17987	17172	21397	19204	14840	14973	19386	17496
-4.85	128157	128679	136994	128596	89340	97297	106137	105424	94130	115537	135702	120887	48655	43027	65144	55304	38415	45885	55420	48233	17492	18293	23175	19218	18336	17189	21606	19390	15369	14875	19457	17216
-4.76667	127367	127744	136360	127887	89680	97957	106602	105316	95652	113870	136113	120514	49871	43970	66107	55430	38971	45993	56107	48500	17377	18412	23542	19147	18207	17472	22127	19556	15608	15273	19544	17675
-4.68333	128190	129424	137356	127850	89936	98426	110931	105474	96254	115274	135931	125856	49677	43468	65945	56599	39946	46044	56380	48881	17695	18756	22919	19613	18153	17333	22366	19508	15926	15318	19692	17745
-4.6	128470	131738	135190	130045	90421	98507	108081	106677	96815	116718	137228	125383	50149	44365	66106	55981	40219	46555	56493	49487	17644	18961	23412	19657	18569	17331	22190	19608	15814	15484	20233	18228
-4.51667	130379	126642	134920	131788	90559	98386	107594	106849	97247	116830	138944	123804	50255	45367	66174	56499	40427	47594	56860	49440	17841	18972	23418	19829	18816	18091	22573	19751	15929	15511	19874	18108
-4.43333	130332	129019	134807	131794	91534	98967	109947	105638	98034	113462	137156	121557	51481	44997	66549	56432	41228	48284	57121	50378	17948	19422	23663	19860	18706	17886	22442	19952	16067	15755	20142	18332
-4.35	131388	130655	138066	127458	91253	99151	108193	106206	98386	116059	137195	123616	51346	45797	67140	56998	41118	48366	58367	50920	17800	19562	23720	19925	19015	18126	22665	20430	16028	15981	20459	18233
-4.26667	130790	130693	136786	131542	90687	98953	109633	104952	99042	118947	136591	124743	51620	45806	67113	56548	41374	48120	58343	51142	18090	19352	23861	19912	18964	17860	22745	20468	16325	16196	20330	18579
-4.18333	129782	128276	135246	131552	91479	99032	108004	107096	98374	118329	137970	122036	52298	46269	67552	57635	41552	48461	57864	50948	18487	19396	24423	20324	19038	18406	22814	20526	16331	16172	20960	18746
-4.1	128634	132405	138010	131793	91596	100063	106871	108889	99094	118070	138765	124221	52399	46786	67956	57774	42535	48747	58397	51502	18658	19286	23801	20569	19172	18152	22807	20810	16724	16454	20661	19191
-4.01667	132261	131014	139288	131812	91248	100614	109579	107181	99844	117233	142806	123139	52872	46919	68122	58585	42934	49443	59418	51996	18428	19233	23979	20519	18812	18924	23380	21022	16560	16290	20990	18843
-3.93333	131992	130231	138124	131667	91815	100145	108276	109059	100529	119290	137763	124059	54107	47609	67654	58281	42824	49174	59289	51484	18504	19834	24340	20771	19605	19051	23253	20955	16914	16908	21223	19119
-3.85	132558	130640	139504	132406	92929	99175	110761	107327	100870	120794	138645	123181	53068	48101	68989	58973	43518	49649	59680	52374	19224	19818	24388	20592	19460	18582	23920	21397	17072	16535	21032	19378
-3.76667	131933	132161	138335	128206	91949	99438	108785	104995	100261	117869	139899	121476	54664	48511	69236	59257	43468	50122	60085	52511	18854	19925	24393	20879	20042	18838	22959	21135	16983	16930	21577	19504
-3.68333	132829	130200	137261	131915	92502	99670	111097	110152	100932	119292	136917	121388	54135	48597	69360	59320	44295	49921	60857	52535	18917	20293	24669	20818	19808	18866	23794	21046	17334	16948	21373	19532
-3.6	132756	132562	138096	134215	93452	99229	109516	106414	101247	115575	140694	126284	54757	49081	69780	59712	44292	50349	60247	52925	19212	20200	24945	21088	20183	19224	23512	21227	17419	17389	21457	19268
-3.51667	132929	130512	137453	133416	91826	100292	108973	108967	101557	117845	138476	124970	54903	49217	69429	59503	45147	50770	60148	53067	19180	20017	24765	20720	20201	19343	23940	21687	17197	17476	21586	19958
-3.43333	133976	133823	141413	133993	93838	101062	110015	107907	101421	116968	138973	122585	55182	49378	70106	60862	45199	51093	61172	53753	19557	20164	24905	21381	20082	19716	23978	21537	17830	17677	21544	19708
-3.35	133459	131032	139116	136784	93482	100544	111146	107282	102709	119209	139185	127857	54831	50213	71056	61031	45598	51203	61909	54077	19715	20544	25199	21401	20528	19764	23694	21852	17563	17456	21570	19604
-3.26667	134939	133376	138841	134273	92316	100746	107582	108612	103752	118090	136616	123309	55415	50871	71354	60327	45579	51596	61097	54138	19670	20591	24863	21455	20423	19920	23766	21929	17875	17471	21804	20008
-3.18333	131135	135794	137229	130458	93063	101720	108545	107594	103955	119439	138150	124815	56271	50842	70959	60420	45681	51801	61034	54142	19790	21238	24947	21289	20394	19628	24009	21943	17975	17633	22196	20227
-3.1	132837	132513	137754	132598	94316	101550	109579	107253	103076	120472	140810	122708	56164	51153	71247	61183	46860	51698	62201	54694	19624	20743	24937	21542	20473	19744	24089	22422	18028	17753	22087	20149
-3.01667	134449	131557	136337	131525	92883	101674	110938	108869	102478	119285	137790	124976	55673	50899	71572	61916	47091	52677	61836	55246	20134	20390	24720	21815	20653	19626	24538	22331	18214	17853	22004	20370
-2.93333	129413	134658	135770	132924	94405	101054	110568	106143	103957	119281	139292	127181	56838	51773	71282	62147	47302	52807	61897	55078	19668	20946	24829	22003	20541	20387	24392	22078	18202	17814	22284	20709
-2.85	134476	132331	137187	132833	93943	100984	108222	107121	105579	119608	138424	123370	57359	51767	71731	62170	47409	52378	62355	55593	20030	21147	25041	22084	20814	19953	24493	22702	18439	18249	22302	20838
-2.76667	134658	136537	138741	131241	93897	100009	111400	108607	104049	120905	137688	125689	56587	52498	72313	62677	47629	53290	63178	55879	19982	21298	25185	22036	21254	19951	24641	22634	18561	18249	22538	20853
-2.68333	135506	136229	139787	131088	94096	101363	108697	109101	103901	117798	136501	125482	57482	52218	72537	62692	47953	53546	62864	56089	20091	21210	25862	22114	20947	20155	24321	22882	18546	18529	22433	20988
-2.6	136730	133440	139629	134988	93538	100628	110827	107445	104782	117543	139400	123087	57631	52045	72485	63696	48467	53147	63342	56420	20086	21316	25721	22253	21264	20288	25132	23044	18954	18490	22180	20593
-2.51667	132650	131447	136972	134082	93735	101342	109248	110856	104681	120344	136716	128050	57977	53139	72525	62798	48464	53500	63090	56502	20618	21237	25995	22471	20974	20493	25009	22906	18870	18531	22836	21458
-2.43333	134730	129540	138640	136228	94064	100607	109824	109635	104819	121385	134349	123674	58508	53575	72719	63220	49118	54018	63647	56399	20685	21572	25721	22074	21553	20672	24804	23087	19038	18955	22599	21307
-2.35	134030	138424	135655	131334	95290	100555	108219	110709	104357	121374	138468	123282	59275	54167	73110	62892	49081	54246	63944	57005	20633	21733	25622	22306	21763	20863	24551	22897	19069	18920	23203	21194
-2.26667	135985	135206	137009	134647	94888	100877	110512	110859	104791	118171	134924	124187	59803	53958	73547	63718	49720	54363	64205	57048	20727	21223	26074	22752	21671	20853	25110	22896	19278	18649	22894	21435
-2.18333	135394	133013	137683	131129	95009	101763	110999	109747	105133	119430	138083	124633	59139	53974	73682	63689	49876	54221	64494	57419	20707	21579	26170	22828	21470	20651	24988	23508	19340	19042	22829	21432
-2.1	132611	135001	137591	133834	94310	100802	110301	111325	105522	122860	135044	124907	59887	54247	74353	64335	50424	54478	64806	57645	20833	21787	26401	22568	21727	20936	25154	23820	19287	18776	23519	21733
-2.01667	136878	135785	137809	132880	94983	101224	110316	109767	104871	119932	136300	124554	59692	54677	73960	64105	50505	54663	64823	57834	20663	22144	26002	22283	21994	21060	25077	22888	19263	18853	23098	21686
-1.93333	137886	134833	136600	134032	94676	102677	109251	111213	104353	118705	138104	122727	59252	55372	73687	63754	50982	54890	65426	58376	20791	22252	26572	23340	21433	21490	25158	23503	19345	19088	23013	21698
-1.85	134223	134968	137833	129752	95356	102527	109459	111326	104470	118169	138413	125025	60159	55946	74260	64554	51308	55182	65171	59100	21078	21873	26626	22924	22011	21458	25475	23797	20023	19441	23311	22092
-1.76667	133128	132856	138701	132434	95178	102279	110663	110033	105469	123661	136851	123724	59955	55440	74047	64252	51022	55952	65594	58274	21453	21831	26569	22902	21606	21587	25604	23730	19542	19104	23666	21959
-1.68333	133970	133251	138264	131542	94822	101887	110908	109091	105202	118070	138065	125705	60146	56138	74411	64702	51176	56172	65587	58882	21166	22366	26429	23194	22211	21328	25350	23975	20029	19197	23657	21902
-1.6	136080	135473	138073	134365	94783	101922	109878	107352	105683	119156	137588	126693	60595	55742	75237	64704	51725	55710	64990	59136	21104	22216	26549	23255	22194	21488	25942	23843	20001	19543	23490	22121
-1.51667	136065	131971	137869	133597	95325	102015	110269	108263	106004	120645	137594	128262	61285	56594	74646	65784	52177	56110	65971	59608	21457	22595	26731	23342	22272	21769	25360	24049	20241	19805	23850	22118
-1.43333	134246	134961	138999	131516	95247	102507	111247	109563	104884	120720	139804	124694	61061	56447	75247	65591	52001	56301	66064	59881	21511	22538	26688	23441	22304	21659	25441	24000	19977	19727	23981	21855
-1.35	131500	135008	137758	131571	94411	102274	107956	108858	106685	119473	136416	124872	61098	57427	75422	66139	53013	56837	66460	59523	21376	22225	26704	23417	22232	21509	25731	24239	20035	19910	23794	22417
-1.26667	132039	133373	139572	131731	94995	102694	109860	108140	105303	115350	138330	125307	61346	57556	75246	65741	52204	56898	66012	59448	21665	22608	26718	23581	22486	21661	25834	24239	20153	20061	24078	22182
-1.18333	131272	133600	135840	131291	94893	101674	110033	109450	107559	124378	134019	122944	61941	57166	76111	65999	52765	56438	66421	59470	21624	22827	26760	23531	22482	21832	25667	24194	20260	19679	24521	22392
-1.1	135102	136248	136988	132193	94545	101836	109751	109447	105552	122741	136394	123697	62205	57876	75771	66061	52790	57495	67193	60579	21515	22449	26790	23084	22225	22252	26094	24392	20712	19562	23776	22420
-1.01667	134576	133150	137030	131273	94228	101959	111394	108027	106656	119374	136340	125970	62041	56551	75524	66758	53359	57120	67560	60781	21687	22959	26829	23412	22910	22066	26271	24589	20463	19888	24057	22838
-0.93333	134479	133436	135538	132367	94817	101907	109596	112223	107719	121836	132463	123461	62468	57431	76487	66839	53489	57215	67403	60534	22140	22948	27337	23740	22711	22148	25844	24721	20490	20262	23563	22468
-0.85	133855	133150	137032	134065	94591	102434	109448	112596	106350	120915	132953	124733	61894	57843	76243	66684	53730	57349	66926	60610	21693	22612	26794	24151	22806	21806	26052	24940	20799	19882	24139	22387
-0.76667	136265	131260	138445	130191	94280	102808	110029	107557	104101	120624	135999	123035	62575	58019	75706	66938	54056	57367	67585	60836	21876	22492	27184	23504	22568	22375	26042	24956	20941	20415	24436	22768
-0.68333	132472	136389	133939	131221	94751	101954	109427	107172	107131	118171	135616	122418	62422	58382	76182	67250	54494	57617	67930	61039	22018	23037	27281	23985	23095	22432	25878	24825	21028	20382	24310	22473
-0.6	134558	133866	137128	129471	94775	102035	114281	110377	107172	120431	137957	124106	62444	58736	77039	67125	53714	58507	67267	60521	22020	23064	27208	24022	23332	22840	26276	24863	20622	20318	24437	22744
-0.51667	133018	135169	134685	130185	94931	102941	111358	107059	106497	120183	135279	122717	63052	59230	77660	67439	54066	58809	67754	61386	22611	23397	27201	24140	22878	22126	26223	25162	20800	20457	24370	22827
-0.43333	134919	135059	137120	132270	95722	103496	105619	110969	108275	119778	134593	123409	63194	58690	76941	67233	54250	58830	68249	61380	22098	23450	27335	24036	22884	22921	26546	24855	20966	20404	24703	23020
-0.35	133861	136378	136030	128017	95790	102034	110207	110510	104801	119443	134295	125077	63282	59904	77273	67696	54995	57899	68688	61917	22155	23048	27581	24301	23293	22740	26570	24856	21029	20381	24888	22885
-0.26667	134261	134126	134539	129601	95033	102188	109821	109743	108388	118104	135570	125580	63486	59195	77102	67869	55614	58809	68446	62108	22225	23428	26970	24415	23158	22286	26454	25418	21155	20407	24394	23089
-0.18333	135537	129499	135657	132350	95395	102154	109310	109676	107396	115174	133763	122772	63996	59161	77064	67481	55685	58580	68332	62428	22352	23214	27488	24386	23300	22613	26476	25167	20850	20581	24573	23232
-0.1	132319	131704	138765	128428	94871	102506	110285	109866	108785	120557	135021	124041	63399	58618	78035	67388	55562	59247	68607	61979	22089	23570	27537	24081	23247	22604	27068	25219	21215	20997	24912	22977
0
0.13333	120469	122391	126392	123796	87806	94637	102384	102127	98829	109757	124251	112037	58133	54730	69949	62436	50169	54000	62380	56407	20588	21892	25185	21997	21731	21267	24485	23579	19374	19393	23072	22060
0.21667	121207	121909	128006	125591	87532	94944	101768	101211	99306	108562	126064	111457	58280	54427	69641	62864	50819	53809	62170	56914	20620	21138	25333	22381	21705	20946	24664	23077	19659	19637	23010	22006
0.3	127240	125424	128601	127288	89172	94167	101912	101881	101397	112139	125934	111500	58839	54656	70318	62732	50521	53796	62177	57051	20806	21538	25433	22310	21786	20754	24602	23077	19375	19458	23602	21968
0.38333	126735	124305	127205	127912	92415	94327	103495	101356	104913	113843	127668	116590	59381	54503	69502	62884	52088	54226	62002	57261	20754	21442	25072	22060	21887	21324	24724	23202	19747	19878	23469	21900
0.46667	130065	123695	128540	126709	96630	95153	103206	101345	108477	111866	124886	111909	61911	55159	69611	62985	52883	54072	63048	57088	20911	21374	25167	22199	21331	21490	24535	23037	19625	19520	23403	22068
0.55	137265	120347	128198	125328	100204	95470	103617	101732	111968	112205	125266	116764	65380	55118	71395	63179	55841	54723	63234	57860	21457	21526	25046	21982	21828	21064	24664	23453	20277	19449	23663	21867
0.63333	143329	123446	128192	124936	105172	97166	103406	102634	116514	111327	124466	116164	69581	54993	71124	63402	59461	55022	62875	57789	21652	21234	25305	21994	22726	21586	24731	23539	20977	19771	23699	21827
0.71667	145392	123307	130903	126678	107930	98214	103454	102700	120361	111628	125208	112500	74533	55814	71156	63500	63867	55120	63270	58228	22065	22002	25588	22130	22662	21307	24533	23609	21985	19764	23432	22098
0.8	151995	123993	129185	126008	113083	100073	105357	103450	120986	115160	125401	113746	78896	56544	70459	63075	67802	55156	63584	57859	22981	21769	25633	22184	23516	21432	24690	23464	22260	19922	23745	22405
0.88333	155242	125323	129353	127567	119688	102451	105553	103442	128378	117116	125136	113430	83106	57268	72067	63864	72383	56240	63396	57610	23981	21605	25421	22579	23746	21159	25044	23440	23349	19772	23851	22594
0.96667	159278	127482	129145	126019	119174	103960	104448	103326	131222	119265	126558	113763	88375	58029	71505	63724	75637	57219	64511	57970	24288	21977	25462	22434	24759	21463	25260	23518	24294	20341	23589	22304
1.05	164428	130258	132393	127509	121495	106347	106890	103131	140619	121739	125735	115408	91390	59155	72147	63439	79819	57691	63949	58882	25355	22068	25308	22622	25491	21763	25071	23707	25410	20540	23825	22599
1.13333	172761	133057	133934	122615	125800	107143	108560	104210	139507	123082	129498	115056	94672	60429	71975	64033	83457	59090	64642	58798	26890	22018	25624	22289	27004	21697	24984	23630	26060	20541	23805	22545
1.21667	172634	133337	134656	125852	132302	110503	107715	103994	143354	124836	132036	119690	98254	62435	72709	64162	86930	60127	65598	59167	27241	22662	25649	22514	27423	22195	25224	23627	27325	21010	24003	22389
1.3	174644	139554	135385	127333	136506	111025	109096	103861	147437	125058	132558	112487	102626	64565	73163	64367	89640	62021	64728	58930	27895	22653	25396	22462	28303	22428	25200	24023	28333	21065	23677	22468
1.38333	178924	138281	136759	128137	137926	114444	112864	104179	152895	129652	133810	115390	103771	65679	73778	64515	92784	63262	65898	58661	28623	22606	26322	22513	28811	22240	25531	23615	29004	21485	23999	22960
1.46667	180579	142785	139496	126660	136404	116305	115266	105372	151057	129535	135242	113908	105176	68074	74352	65484	94077	64658	65649	58925	29251	23336	25731	22805	30008	22714	24974	23745	29751	22057	23939	22955
1.55	183424	144274	136532	125684	144397	116800	116015	106062	155567	130184	133666	115996	107915	69464	75341	65206	97847	66532	66130	59658	30257	23604	25974	22941	30735	23090	25320	24157	30594	22458	24076	22684
1.63333	184313	142831	141183	130611	142147	118133	115580	105836	157529	132066	136104	115786	108344	71866	75230	65308	98836	68403	67568	59877	30925	24038	25768	22846	31544	23509	25520	23977	31445	23716	24256	22414
1.71667	182029	141965	142327	127544	145010	123317	119453	107336	161333	133684	139526	115779	112377	74724	76323	65181	101410	70800	67597	59554	31370	24510	26101	23088	32123	23808	25092	23939	31897	23762	24214	22792
1.8	186475	151532	142180	128675	146411	125326	120021	106081	160999	137587	141149	117616	113003	77220	76948	65411	102803	72530	68590	60835	32060	25465	26355	23219	32683	24575	25074	23799	32110	24224	24491	23153
1.88333	188340	151085	139152	129067	147605	127145	118851	109325	159574	137405	140840	116645	114799	78838	77809	65894	103884	74448	69328	61028	32021	25665	26231	22771	33104	24887	25459	23719	33210	25207	24881	23014
1.96667	190389	152499	143590	130274	148654	128070	124013	103868	163159	139670	139597	118231	115115	80915	78671	65807	103979	76545	70761	60553	33084	25987	26594	23156	33424	25606	25407	24403	33540	25515	25421	22977
2.05	190729	155993	145103	128227	148094	129278	121854	107213	164025	141467	141287	120502	115348	83400	79442	66759	106055	78640	70928	60135	33139	27112	26252	23104	34105	25840	25770	24351	34305	26111	24769	23520
2.13333	191114	157337	146873	130570	152758	132515	125190	109799	162743	140944	142920	120126	116466	85342	80702	67592	107262	80372	72348	62066	34446	26896	26210	23319	34587	26558	26131	24470	34597	26944	25215	23371
2.21667	190450	157908	147027	130383	153028	135041	123442	112633	166971	143310	146167	118511	116820	87940	81334	67375	108915	82094	72712	61869	33975	28145	26764	23610	34923	26859	25967	24764	34574	27632	25032	23710
2.3	195444	162289	149891	130444	153658	135676	125980	107597	167762	144066	147251	120791	119065	89791	83069	67961	113148	84040	73665	63030	34707	28404	27077	23586	35276	27841	26505	24880	35053	27820	25803	23429
2.38333	197373	161836	149943	132383	155390	139497	129365	110083	168319	144728	146018	125361	121746	91121	84001	67839	107807	86450	75093	62619	35101	29323	26679	23506	35337	28165	26028	24590	35287	28911	25860	23477
2.46667	196504	164149	149156	134299	158598	139917	128119	112670	169883	148832	143818	122108	119801	93809	84332	68826	110135	87579	75850	62678	35536	30044	27224	23368	35946	28552	26550	24543	36212	29258	26489	23633
2.55	193664	167222	154620	134083	154440	141649	130119	114851	167079	151750	152098	125539	119985	95398	86769	69398	111643	89581	76777	63371	35639	30248	27609	23467	36013	29152	26591	25121	36089	29744	26508	24247
2.63333	195920	166632	153090	133925	153897	143349	133479	116899	169434	151293	149055	123924	123447	97053	87552	69109	111783	91150	77407	64263	36072	30141	27818	23195	36359	29618	26665	24887	36708	30129	27100	23912
2.71667	195385	165768	157518	136064	154382	145388	131583	115324	171897	153911	148955	126214	124238	99242	88538	69736	113976	92754	78280	64945	37088	31102	28631	23384	37310	30060	27210	24595	36709	30926	27110	24441
2.8	194980	172781	156901	131539	159998	147210	133587	116323	169416	157114	151953	124200	122403	100169	89140	70869	113110	94456	79383	65430	37055	31259	28356	23495	37054	30209	27549	25162	37493	31079	27626	24237
2.88333	199337	171271	158289	138280	156301	149004	133886	118427	172511	158232	150601	125456	122562	102166	90433	70881	112279	95867	80264	64917	36576	31837	28527	24005	37125	30693	27074	25320	37878	31626	27681	24580
2.96667	195686	175341	158814	134554	156044	150531	136569	114983	168994	157566	150185	124696	124188	103330	91492	72005	114470	96886	81769	66520	37229	32521	28989	23866	37792	31100	27708	25472	37463	32067	27780	24013
3.05	199880	176646	160329	137099	159036	151126	135028	120445	170059	156662	158219	130021	124876	104339	93027	72558	114519	99425	81713	66321	37317	33131	29145	23897	38063	31671	27466	25428	38261	32678	28330	24445
3.13333	197879	176394	160724	136035	155609	152496	135459	118773	170924	160780	156620	126503	125558	105008	93720	72807	114058	99562	83339	66961	37816	33586	29514	24004	38140	31813	28714	25466	38655	33237	28820	25239
3.21667	194845	174859	160896	140733	160748	155025	139850	119655	170907	159744	153234	128368	122776	107131	95486	74097	119444	100628	84293	67924	37826	33573	29873	23848	38469	32403	28805	25498	38655	32593	29420	24919
3.3	195050	179396	163601	137640	161215	151176	138763	122215	172972	162818	160658	128548	122876	107743	96548	74183	115007	101421	85933	68162	38281	34037	30120	24632	38962	32810	28750	25342	39003	33836	29589	25324
3.38333	198080	178344	166029	138864	159970	156890	142680	120412	171359	160848	160548	127779	121963	107533	97857	74914	116095	102150	85878	68806	38215	34094	30317	24342	38611	33403	29499	25671	38996	33859	29764	25298
3.46667	199222	179272	167607	141889	158390	153746	141107	123072	170504	162670	161420	129204	124390	108214	98725	75949	117851	104254	87975	69574	38817	34858	30528	24574	38848	33564	29086	26077	39268	34319	29610	25883
3.55	198992	179848	166220	138890	156978	155141	146481	124199	170306	166499	164717	131713	126349	108281	100282	76727	114366	105137	88586	70162	38827	35079	30674	24963	39256	33799	29651	25916	39717	34986	30872	25602
3.63333	194135	179349	165000	141995	158322	158145	144270	122729	172117	164133	161952	129490	125179	112676	100847	77459	116855	104307	89506	71237	38712	35670	30979	25038	39266	34252	30027	26112	39983	35155	30855	25603
3.71667	193160	181911	168563	142388	157876	160725	144163	125482	172200	165059	160697	129925	127599	111045	102108	77983	117601	105913	91456	71058	39115	35787	31279	24889	39492	34559	30387	26506	39857	35554	30519	26131
3.8	197432	183800	174408	144230	159055	156281	147435	127931	170487	165968	163566	130419	129699	111046	104100	77982	118782	105817	91360	72478	38854	35805	31763	24994	39447	34636	30498	26059	40309	35076	31573	26291
3.88333	199384	182603	174028	141248	160424	159707	145731	126765	172750	171116	162944	130874	128715	109643	104103	79295	115458	106876	92746	72907	39097	36349	32108	24781	39458	35182	30848	26393	40174	36035	31359	26506
3.96667	196572	183223	170692	142768	160864	163303	150958	127146	170781	168904	166691	133250	127298	115561	104670	80320	115690	106953	94279	73393	39502	36332	32110	25646	40251	35374	31074	26910	40346	36257	32354	26765
4.05	199139	182778	173361	143370	161130	162916	149001	127333	172175	166373	166285	135056	125583	112624	104326	80596	116637	106168	94535	74155	39027	36751	32811	25505	39904	35587	31532	26975	40242	36364	32055	26630
4.13333	198146	187847	176840	142072	157433	159937	153390	126913	171198	172593	164726	132584	128247	113109	106473	81478	118590	109145	96310	74337	39492	36758	32972	25870	40619	35631	31517	27001	40726	37193	32361	27258
4.21667	202147	181381	174264	144240	161376	161646	154255	128213	173913	168298	167591	134693	126542	113687	106962	82968	115765	109226	96483	76289	39708	37263	33428	25679	40371	36015	31830	27324	40525	36539	32603	27234
4.3	199105	185698	173597	147303	158867	164904	149313	130131	173098	168816	169085	135646	125878	114261	109336	83160	117342	109070	97545	75572	39641	37626	33238	25980	40914	35988	32403	27108	40824	37231	33215	27574
4.38333	196929	183764	175139	149242	160795	162647	151546	129617	170009	170674	170029	137929	124335	113827	108463	83966	118595	108929	98692	76485	40276	37679	33528	26063	40995	36124	32916	27513	40822	37098	33470	28003
4.46667	194801	187256	177367	146024	161179	162003	155878	132550	171320	168173	168438	136587	124199	115898	109950	85237	118596	108772	99332	77565	40920	37976	34178	25871	41315	36284	32457	27669	41768	37750	33647	28646
4.55	196219	182859	175597	148384	156980	165848	151888	131072	169937	170279	172029	135083	123598	113630	110443	85280	117523	113440	99489	78885	40230	37845	34093	26641	41176	36794	32749	28294	41758	37720	34042	28810
4.63333	200525	186554	177992	149438	157000	164047	153019	132855	173892	172453	172092	135591	127488	115449	110662	85653	118871	109172	100385	79223	40830	38589	34476	26817	40850	37192	32817	28181	41645	38017	34867	28627
4.71667	196046	187788	178845	148245	158188	161906	156234	135181	171989	167951	175560	136775	127652	114594	114941	87082	118244	112377	100900	79977	40129	38882	35282	26750	41044	36929	33203	28350	42394	38275	34674	28751
4.8	197141	188162	177924	150733	158286	159896	153878	132631	168866	174360	170253	138212	125291	117881	114199	87684	118932	110105	102214	80723	40786	38757	34614	27127	41156	37093	33701	28363	41766	38139	35148	28920
4.88333	195952	181206	179387	148271	156352	165730	155425	136052	169635	171405	174022	137199	129135	119718	114176	88238	118324	114023	103544	81479	40798	38675	35779	27084	41076	37601	33761	29085	42517	38917	34925	28954
4.96667	196599	186031	179547	151482	157672	163619	155159	135149	171623	171006	170286	139244	126468	116126	116465	89076	119723	111980	103479	82451	40952	39112	35189	27094	41767	37447	34020	29061	42116	38686	35248	30134
5.05	196241	186518	179829	150350	158461	164904	155606	134042	166522	169533	177900	139808	128451	118830	118479	90208	119071	111714	105247	82081	41274	38845	35519	27636	41065	37830	34512	29292	42172	38921	35211	29687
5.13333	196576	186944	183511	153972	157955	162471	157428	136371	171133	170245	174330	138900	127310	116690	116618	90569	120618	112578	104451	83821	40879	39486	35455	27587	41685	38242	34495	29071	42688	39095	35744	30210
5.21667	198273	189626	179821	154739	158455	162750	157016	140009	168245	171580	177183	142190	126997	120190	113525	91274	118439	112696	105092	83908	40733	39804	36250	28064	41901	38379	34745	29325	42471	39446	35605	30804
5.3	199029	189051	176719	151984	158604	164319	156343	137810	169248	172909	173309	139219	128705	121826	115403	91833	120321	112090	106363	85161	41339	40116	36606	28158	42202	38320	35340	30047	42268	39628	35951	30409
5.38333	196049	188122	181951	156545	158781	164418	158069	135643	168393	170630	174768	138792	127575	121306	119695	92647	119435	113571	105380	85622	40739	39671	36825	28728	41903	38292	35135	29861	42648	39998	36200	30923
5.46667	195374	191585	183446	155972	157748	166227	159076	138222	172435	173559	175433	140618	128947	118789	116682	93696	119441	114876	108165	86254	41364	39974	36952	28611	41755	37899	35093	30061	42965	39419	36628	31174
5.55	193265	188861	184018	152561	156287	166112	157844	140806	170079	170537	171378	143624	127238	118851	120058	94293	118607	112465	106831	86758	41451	40130	37088	28208	42867	38591	35576	30223	42931	39895	36424	31705
5.63333	194908	186343	180056	155360	159298	163899	158059	141719	170613	173601	173344	140773	125419	119439	120960	95484	115868	114214	107365	87921	41438	39940	37286	29583	42276	39137	35440	30494	43387	40295	37404	31723
5.71667	196834	187754	183278	155499	158494	164940	158411	143195	171053	170202	175927	145908	126911	120475	117338	95253	116499	114291	106202	88448	41820	40868	37575	29501	42976	38698	35516	30335	42938	40412	37336	31757
5.8	192298	187968	180751	156146	159573	167169	159420	141408	168141	173341	174171	145578	127091	118902	117635	95859	120080	114083	106481	89072	41116	40865	37405	29163	42415	39548	35782	30699	43235	40577	37770	31945
5.88333	192357	187853	182201	158108	155790	166316	158190	139779	171128	172131	176718	145736	127351	121462	122747	97629	119280	114346	110127	89095	41992	40186	38069	29637	42889	38986	35997	31262	43332	40642	37388	32398
5.96667	193291	186797	181487	156870	157276	166494	159909	141715	165939	171365	174344	144448	129224	120578	121489	98399	116041	112857	108893	89916	41807	41029	37581	29710	42613	39511	36366	31181	43296	40608	36957	32332
6.05	188907	190698	183234	154145	157084	164612	160618	142955	170595	172044	174846	145681	123994	118332	122257	98505	120392	116482	109746	90699	41357	41182	37859	29992	43099	39659	36306	31466	43657	40962	37565	32586
6.13333	193268	186583	182485	158389	158397	163163	157207	144347	168867	170883	174481	143740	125944	116210	119596	99123	117842	115151	108339	90753	41707	41121	38008	30328	42490	39664	36810	31826	43555	40579	38108	32324
6.21667	193187	184374	183520	156357	161677	165532	159447	144913	163098	172351	179085	145860	126958	118877	121194	99452	119005	118368	107936	91313	42357	41567	38115	30400	42756	39801	36311	31432	43305	41106	37831	33010
6.3	190040	185599	182701	158218	150181	167099	159999	141869	167189	173791	178016	146990	125628	120495	124664	100723	120078	115933	110196	92606	42050	41438	38470	30418	42838	39616	36651	32126	43891	41083	38047	33388
6.38333	189551	187519	183279	154423	157219	166781	163366	143582	163294	172674	173872	144665	126934	117846	121612	100488	121941	115920	110368	93715	42093	41528	38690	30617	43115	39817	36720	32133	43479	40796	38584	33399
6.46667	191049	185428	180580	157157	152630	164666	159591	144967	168061	169732	174536	147711	123468	119316	123099	102017	119124	116225	112725	94543	42068	41746	38970	30664	42742	40018	37802	32288	44025	41510	38401	33820
6.55	190238	187612	182280	162336	156093	162890	162435	142628	162746	171761	175239	146096	127934	123118	122758	101587	121248	114925	110044	94241	42063	41676	39043	31119	42911	40062	36997	32363	44201	41167	38595	33644
6.63333	192828	190806	183372	157924	155634	163971	159887	143455	165602	170213	175196	147807	127996	122399	126018	102483	118184	115207	112513	94436	42249	41770	38978	31068	42774	40576	37369	32779	44366	41613	38206	33979
6.71667	193439	188498	181554	159318	154283	163559	158521	147348	167188	175742	178076	149455	124883	122972	122827	102780	119340	116544	111812	95028	42265	41683	39208	31508	43140	40411	37749	32874	44239	41460	39251	33901
6.8	190610	187373	182500	161390	152448	166715	160313	147130	163469	172356	175473	151708	126324	119761	121625	102842	117727	117199	113168	96647	42272	41768	39461	31798	43241	40212	37626	33319	44350	41436	39390	34426
6.88333	191351	188024	181741	160924	153828	164430	161617	148454	160555	173450	176510	148495	126741	120358	123337	102866	118154	118277	113043	96055	42510	42060	39164	31960	43646	40853	37848	33042	44597	41811	38652	34913
6.96667	187036	185127	182356	159622	151463	163485	161562	147166	162626	170659	172422	147129	124170	119839	123360	104372	117586	120121	111739	96605	42266	42403	39603	31747	43378	40058	37864	33545	44316	41759	39217	34515
7.05	188569	181333	178930	161316	154009	163000	159253	150296	165546	170156	177354	151177	127091	118409	123125	104230	119959	119328	110343	97522	42763	42325	39599	31686	43428	40544	37783	33242	44166	41987	39280	35198
7.13333	185067	186645	181026	159444	153447	163884	161472	146766	163880	171923	173420	153712	125777	119226	123849	105552	119581	116532	109366	97594	42965	42713	39615	32039	43552	40680	38475	33520	44104	42309	39294	35053
7.21667	186021	186534	178114	160249	153192	165028	156347	150145	164041	174226	175873	151033	126183	119850	124362	105680	119559	115989	112359	97955	42202	42352	40331	32035	43713	40685	38290	33602	44555	41615	40233	34895
7.3	183595	186336	184456	160197	149080	164073	159183	149587	164657	173256	175558	148227	124631	119459	124120	107011	120081	116643	111224	98457	42387	42281	40112	31862	43433	40952	38631	34047	44178	42317	39618	35756
7.38333	185262	184152	180735	166035	151979	159840	158212	148835	163533	167983	180282	150238	127811	118613	122516	106259	119578	114968	116210	99037	42774	42370	40700	32419	43331	41452	38568	34022	43942	42114	39660	35636
7.46667	188932	182755	179992	161072	154927	161014	155270	148800	162479	170153	172799	149385	125579	120678	123273	106354	117672	120064	115998	98776	42726	43153	39916	32662	43291	41132	38726	34344	44051	42222	40162	35797
7.55	187938	185693	180250	162344	152932	162512	160524	147400	162962	171032	176758	154237	128473	121086	124982	108046	118376	114995	113439	100137	42868	42778	40514	33220	43796	40822	38915	33860	44157	42749	40282	35727
7.63333	187796	183614	179659	163240	151666	158602	157646	148154	163907	171854	175172	153101	125583	123182	126187	106019	119048	116456	112530	99903	42521	42921	39828	33334	43751	41581	38850	34286	44358	42818	40111	35897
7.71667	186650	183178	180249	163351	149806	160332	158921	148421	162037	170251	174378	152091	125591	121048	124412	108378	119206	116121	114229	100157	42995	42571	40019	33098	44126	41381	38944	34784	44359	42445	40476	36301
7.8	186281	183643	181268	158283	149711	162262	157287	152748	161012	167633	175079	150492	127149	123353	126653	107065	118786	117190	113909	101023	42443	43130	40677	33139	43689	41271	38955	34873	45057	42645	40271	35889
7.88333	183300	182672	182148	166819	149872	161301	158940	149186	158793	168393	174611	154359	125008	118780	125444	104964	119027	116576	112510	101078	42465	42689	40640	33294	43845	41331	39303	35148	44621	42602	40351	36345
7.96667	184141	185325	178511	165105	149210	160907	158716	150305	160432	167861	176353	151631	126767	120860	124586	109953	120184	116334	114116	100888	42349	42943	41147	33412	43548	41253	39120	34968	44714	42713	40613	36514
8.05	185579	182383	179646	164616	149182	163440	155015	149390	162110	173251	173779	152829	122983	122585	125177	106632	117215	117534	112629	101179	42969	43163	41077	33740	43888	41239	38941	35266	44974	43295	40309	36591
8.13333	185325	182362	181516	164416	150925	160394	158715	147522	160577	166562	175975	152641	124752	122886	125169	107864	119551	116789	115352	101221	42956	42764	40742	33664	43633	41841	39154	35003	44927	42358	40889	36424
8.21667	182808	185305	177822	165543	149819	159921	158973	150822	157432	169313	173953	153758	124775	118906	127331	108753	119480	113390	114896	101972	42893	42898	40720	33868	44144	41343	39309	35169	44903	42576	40949	37423
8.3	184713	183690	179528	163410	151553	161978	155605	153918	161615	168652	171627	156203	126667	120862	126266	109720	117017	116482	112096	103208	43265	43160	40865	33801	43756	41767	39407	35614	44586	43388	40809	37147
8.38333	181892	179237	176825	163827	150645	160594	158962	153757	161031	172184	174509	152061	125425	124135	125364	110995	118921	116215	117415	102824	42629	43373	41586	33535	43694	41533	39646	35730	45161	42669	40903	36878
8.46667	184170	184501	178916	167469	146941	160505	154017	148131	158683	167209	171256	153322	119726	118299	125766	107880	115166	117603	112471	104358	42871	43504	41397	33955	43648	41623	39485	35597	45026	43209	40761	37044
8.55	178477	182639	179184	166099	146075	163210	159717	149420	158839	167134	172932	155398	124584	122349	122479	109022	118337	117051	116098	103367	42924	43412	41764	34073	43948	41487	39886	35099	44540	42945	40764	37399
8.63333	182424	183449	176144	166534	148165	157854	155346	147077	159504	170604	173921	148682	122714	123248	126000	109069	117688	119812	115059	104200	42687	44036	41296	34724	43721	41894	39511	35800	44712	43521	41091	37785
8.71667	180912	183063	176919	165300	147952	161768	160542	151002	159812	168118	173362	154649	124515	120078	125882	109918	116966	117213	117223	103431	43113	43360	41560	34473	44012	41725	39569	36037	45265	43889	41013	37773
8.8	185209	180295	182376	164879	147799	158415	157298	150019	157009	165526	172641	153148	121687	121766	123594	108023	114834	115244	117697	104233	43268	43476	41682	34559	43713	41646	40161	36050	45052	43066	41493	37640
8.88333	178698	180993	176264	166149	147539	157762	154953	150036	157868	167348	170863	150545	123811	122028	123030	108889	115945	117800	117973	105178	42902	43701	41297	34760	44011	41977	40183	35923	45026	43148	41123	37557
8.96667	181965	184885	178803	165148	149689	159678	159529	148386	158589	167794	172259	151141	122723	119217	126553	112260	115470	116700	116667	104203	42821	43747	41596	34523	43837	41892	39869	36456	45504	43553	41430	37983
9.05	183214	177546	178890	164428	147824	161224	153055	148144	155182	165952	169973	153243	123133	121430	126443	110240	115684	119826	114999	103912	42975	43900	41449	35139	44081	41541	40253	36583	45218	43786	41131	38156
9.13333	177071	182761	175145	165408	147782	158867	155180	151325	156340	164275	171213	154584	123158	119395	124770	110857	118275	119064	114695	104944	43236	43773	42026	35046	44121	41655	40154	36621	45043	43555	41419	37308
9.21667	184438	180172	176113	165277	146486	162214	155549	154505	154068	162730	168705	157016	126419	119291	127270	107705	117993	117319	115939	105132	42876	43757	41617	35300	43254	42315	40717	36205	45676	43184	41074	37871
9.3	181049	177745	177999	163738	143012	157703	156879	151625	154713	166853	170967	153085	121050	122416	125936	111534	114497	114634	114571	104629	42575	43671	41946	34841	43488	42497	39843	36764	44817	43698	41763	38235
9.38333	179019	180915	175493	161105	145281	161096	155135	152647	157236	167330	170625	154768	124269	117027	121844	112243	116990	117768	115534	105189	42725	44177	41794	35489	43893	42247	40493	36954	45593	43460	41556	38844
9.46667	182340	178998	174841	162515	148708	154685	154142	150072	152440	162282	169615	152375	123655	119480	127154	109758	117182	116599	116359	105560	43168	44230	42166	35590	43844	42318	40556	37082	45374	44236	41701	38335
9.55	179132	180270	173708	162240	146177	158913	153206	152365	152489	165781	170679	153712	120800	121734	128549	109750	119425	119117	119719	105679	42927	43652	42230	35339	44041	42630	40664	36492	45806	44368	41728	38667
9.63333	180197	178392	175384	162586	144570	160455	156422	151958	153552	165380	171135	153106	120897	121207	126437	112397	116834	116419	113794	104730	42767	43931	42506	35229	44035	42567	40090	36761	45250	44038	41712	38316
9.71667	176713	179115	176776	163188	145787	160861	154551	153025	153338	163703	172980	154226	122177	121534	127217	110968	119347	117223	116207	105986	42381	44092	42681	35859	44075	42611	40522	37102	45239	44041	41669	38344
9.8	179289	176695	176741	162513	146462	157929	154998	149983	152990	165827	168959	154283	120640	118898	126877	112478	114709	117058	117689	105631	43355	44397	42139	35491	43899	42398	41084	37029	45610	43219	41691	38828
9.88333	174723	180353	174912	163133	143303	157996	153208	150681	152622	163867	169131	152111	119155	118044	124160	111567	119851	116567	114859	105911	43040	43893	42288	35826	43982	42314	40770	37209	45726	43436	41921	38738
9.96667	180531	181272	178102	162980	145515	159384	155548	150795	152877	163647	167339	153499	121513	120216	125948	112810	118218	116548	115925	105705	43061	44167	42238	35872	43795	42407	40364	37346	44828	44023	41754	38853
10.05	175727	176416	174829	162024	146674	157255	154917	147713	151996	161294	170807	150892	121419	121367	125835	113056	116917	119387	114869	106471	43166	44364	42152	35472	43871	42347	40713	37145	45461	43927	42088	38896
10.1333	176552	177189	173925	162136	147335	155708	155140	147640	152858	163168	166566	153981	122171	118212	124925	113369	116770	116915	120887	104107	42427	44663	42484	36222	43836	42123	40321	37451	45463	44008	41960	38507
10.2167	177207	175909	172605	161370	144434	155558	151753	149772	150224	161574	169544	154447	121062	119627	126334	111889	112721	117207	115876	105370	42518	44355	42730	35457	43852	42527	40852	37472	45525	43494	41842	38602
10.3	174436	177170	172623	167553	145705	156152	151825	150759	151022	162064	167579	154154	121001	119944	126814	111130	114088	115854	117044	106792	42600	44273	42587	35694	44232	42225	40885	37760	45991	43546	42315	38483
10.3833	174541	177182	174636	161173	144456	157108	150150	151209	150473	163104	168266	154776	121092	120322	125672	110573	114569	113931	120100	107301	42625	43942	42603	36216	43598	42128	40780	37614	45334	43539	42030	39421
10.4667	172882	173916	172829	161456	142026	158193	150775	151933	152119	161508	169403	154385	120709	119070	126537	111258	116190	115895	114454	106027	42943	44335	42656	36187	43571	42418	40864	37587	45690	43958	42251	39986
10.55	177045	173066	171200	160672	144236	154041	152681	148121	153418	163139	169172	151539	120138	119411	126226	111500	115947	115549	114893	105840	42934	44478	42418	36083	43921	42236	41109	37842	45132	43968	41925	39022
10.6333	173693	174924	174222	162757	142238	154395	153299	148633	152417	160755	168833	151184	120047	118847	123932	111686	114801	114270	115718	105923	42541	44718	42929	36401	44311	42211	41036	37956	45749	43794	42016	38926
10.7167	175260	177490	172662	162328	142578	156839	149924	148283	153289	161347	168674	152814	121210	118539	124843	110100	117093	117510	116842	109455	42605	44186	43099	36079	43415	42648	41405	38054	45142	44275	42318	39511
10.8	174834	173275	172397	162160	141914	157478	148983	154039	148771	158560	167179	150817	120128	112614	125478	110786	115756	114652	115656	107451	42350	44415	43063	36787	43828	42629	41129	37932	45247	44217	42408	39457
10.8833	173233	173746	169814	160366	143295	156171	151193	149293	150118	162386	170235	151808	117491	120137	123556	113795	114409	115849	114117	106494	42584	44198	42793	36701	43893	42382	41189	37954	45306	43853	42408	39634
10.9667	176070	173040	172412	160190	137691	155896	153004	148882	151791	160077	169548	153244	117568	118091	123058	111635	116197	117621	115777	106113	43113	44572	42549	36535	43786	42622	40896	38159	45660	43875	42012	39726
11.05	177320	176084	174631	164656	139222	157761	149688	150687	151842	162585	166445	149519	120656	119908	126499	113457	115499	113868	118669	106834	42864	44483	42614	37046	43307	42387	41199	38132	45920	44855	42367	39790
11.1333	170698	177342	170452	160405	140598	156628	152062	152656	150043	157966	166232	151905	120024	117274	126365	112076	115937	117346	117303	106654	42807	44360	42674	36537	43971	42622	41478	38279	45381	43934	42214	39859
11.2167	171338	176085	176057	161053	139113	154610	150753	147993	149448	161195	167466	153538	120390	118158	128330	112425	113589	118757	119489	106729	42344	44110	42852	36456	43824	42525	41427	38438	45293	44370	42415	39702
11.3	174350	172452	171387	159868	137968	155152	150161	150518	149703	160068	165368	154347	118866	116016	124469	112374	114525	115377	115960	105474	42509	44214	43103	37077	43753	42804	41403	37755	44929	44478	42504	39958
11.3833	172039	172067	174144	159929	140935	154276	148323	147621	147669	160233	166301	150030	118296	117461	119548	110909	113622	113048	116523	106044	42644	44967	42647	36969	44043	42971	41358	37927	45314	43933	42773	40004
11.4667	169967	171264	168794	159719	140717	153229	149025	151683	144854	159241	163731	150300	119772	118176	124443	111816	113086	114867	116429	106198	42519	44286	42981	36823	43797	43046	41225	38202	45408	44077	42278	39380
11.55	170101	172659	171351	160724	140193	153463	148890	147677	145946	155237	165211	150178	121492	119906	125310	112613	114681	116321	116661	105528	42469	44149	43418	36706	44163	42280	41507	38353	45368	44136	41936	40374
11.6333	171426	172622	172106	162486	140364	153897	147840	148049	149309	156037	163346	154079	121478	119706	122528	114458	112890	117373	116879	106016	42254	44028	43100	37022	43619	42891	41436	38095	45610	44083	42229	40335
11.7167	170216	176422	171628	159917	135908	153372	146268	149354	152398	160198	163108	152917	119824	119483	123073	111926	111178	116516	118887	107274	42779	44476	43157	37297	43742	42949	41306	38270	45501	43878	42366	40186
11.8	173888	172318	165945	161975	142832	153347	152994	148137	147839	157847	165935	150672	117692	118730	122994	109892	114636	115132	119852	108557	42281	45128	42871	36749	43533	43458	41248	38361	45882	44655	43119	39659
11.8833	168328	169813	171358	160422	137285	154266	149004	145068	144489	156654	163203	152794	118296	117631	124897	111135	113231	113231	114961	108282	42792	44448	43163	37202	44551	43027	41257	38552	45308	43975	42207	40244
11.9667	170072	170497	167004	159091	141932	151527	148550	149523	146952	156092	161956	153316	117913	118380	124826	111941	112970	118420	116127	106158	42803	44097	42595	37228	43549	42839	41947	38433	45625	43920	42697	40027
12.05	173212	172177	170182	155156	136830	150887	149482	147309	142791	158312	163423	151026	117264	114920	124890	111239	110714	117197	114846	107785	42173	44575	43579	37576	43825	42698	41043	38753	45138	44373	42695	40185
12.1333	169857	170582	167703	159676	138192	150369	147386	144888	147289	156020	166415	150728	118981	116277	122278	111591	114823	114670	113963	108224	42396	44734	43150	37261	43585	42531	42082	38437	45793	44383	42549	40050
12.2167	170008	168722	170083	159750	134535	151470	149235	146756	146004	153867	163599	148012	117242	119741	122530	112439	114119	117795	115004	106831	42126	44634	43259	37082	43678	42374	41539	38932	45714	43979	42967	40166
12.3	170812	171090	167350	158109	134644	148708	146165	148265	141131	154896	163525	148083	117457	118006	126152	112604	112611	112489	114955	108090	42891	44330	43124	37215	44159	43110	41349	39014	45505	43799	42193	40253
12.3833	171386	170940	168858	158756	137436	152298	150762	144989	149060	154168	161908	148075	117880	119009	125024	113355	114754	111921	116353	107548	43199	44507	42908	37413	44018	42886	41547	38849	45454	44202	42558	40536
12.4667	166461	169308	167509	157976	136172	151680	149772	144167	144457	154870	160824	149021	118474	117120	121646	114170	115097	114706	118331	106232	42861	44562	43071	37571	43838	42551	41510	39048	45687	44029	42643	40613
12.55	167688	171924	170737	155963	133992	154121	146790	145574	145527	154935	159262	149198	119956	118033	124999	112280	112334	114965	116107	104772	42307	44945	43031	37211	44013	43298	41621	38742	45626	44698	42314	40544
12.6333	169605	169781	164013	158608	133208	152352	146349	145650	144602	153944	161351	150596	116640	114939	125599	113538	115112	111959	115511	107075	42301	44597	42813	37450	43531	42941	41226	38709	46127	43837	42560	40248
12.7167	166542	173122	165975	159673	134392	150269	146840	145607	143304	155780	160955	148131	117847	115047	121520	112547	113693	111760	116200	108044	42625	44552	43115	37702	43150	43206	41360	38788	45724	44480	41935	40229
12.8	163827	165768	165066	157968	131638	150549	146350	143435	143863	155448	158156	147425	116890	114535	121974	114193	111699	114496	114333	106374	42258	44581	44173	37613	43136	43051	41576	38657	45367	44370	42446	40241
12.8833	168671	169149	166839	159644	135229	148825	144585	144724	141570	153889	161760	150295	119049	114491	123511	110531	111702	113258	115915	107933	42126	44884	42957	37487	43312	43155	41719	38634	45689	44341	42660	40420
12.9667	167973	167849	166829	157967	132546	150255	147171	147334	140644	154273	162159	149568	117390	116697	123493	111790	111385	115042	114912	109269	42669	44863	43171	37613	43678	42954	41299	39108	45564	44201	43046	40813
13.05	165966	170326	165285	157410	134252	147733	146915	142351	144503	154220	160687	146847	116181	118135	125448	114236	110489	117489	112184	107272	42021	44724	43529	37647	43104	42620	41508	38646	45486	44810	43183	40531
13.1333	167918	168578	163587	156877	136220	149010	148632	143860	142469	156684	161037	146447	115489	115719	121586	110000	111217	114973	114713	107448	42517	44789	42728	37588	43614	42877	41553	39070	45236	44441	43486	40596
13.2167	169166	167647	164800	156310	132062	147351	145390	143627	143757	154938	159290	145655	116896	117635	122770	111313	112400	115245	115698	105755	42452	44995	42876	37778	43250	42434	42127	39692	45699	44304	43152	40551
13.3	167184	168437	166383	157336	132562	150534	145175	143689	138717	150730	160162	145690	117362	116427	122406	110748	112890	112312	113760	107968	42449	44868	42891	37858	43861	43076	41541	39221	45296	44691	42691	40490
13.3833	164744	164844	166833	155784	133734	152343	143953	140568	141529	154259	163750	145205	116311	115698	123425	112730	110287	112804	118404	108077	42195	45297	43193	38402	43417	43042	41145	39075	45534	44044	42792	40437
13.4667	164726	167485	160621	159628	134551	145257	142684	141108	139498	151094	158017	145635	117339	117976	126022	111271	110390	115343	116536	105591	42451	44734	43295	37871	43665	43348	41714	39257	45965	44188	42883	40205
13.55	165998	168695	166052	155438	131396	148055	146156	142734	139763	151836	157651	147222	114454	115234	118763	113211	111222	113319	116072	106919	42022	45332	43362	38114	43607	42717	41868	39711	45752	44238	42533	41011
13.6333	164635	170571	164146	156925	135992	147748	145185	142574	141607	148596	160274	151637	117600	115130	123992	110990	109384	115910	113702	106767	42166	45007	43318	38252	43470	42424	41093	38938	45304	44127	42805	40942
13.7167	165686	165125	163819	154707	133791	147582	141542	144926	140300	149669	159236	146475	114493	115540	121653	112758	111640	114643	115369	107794	41806	44667	43119	38097	43283	42827	41271	38952	44769	44848	43141	41107
13.8	161641	164219	164866	154450	131596	145385	145748	143388	141834	151964	157314	142579	118212	112250	124372	111543	109900	114040	114474	107229	41941	44811	43386	37508	43269	42428	41440	39252	45573	44310	42796	40950
13.8833	164985	165089	163444	155007	134764	147160	147551	142707	140054	152310	158236	148366	116985	115888	122457	111203	111706	112848	114163	105371	41930	44748	43187	37882	43323	43104	41420	39175	45103	44118	43171	40762
13.9667	162720	166303	165406	161235	131843	145179	143039	142143	139578	146693	154786	145622	115445	112696	123372	111223	107825	113567	111944	107415	41734	45034	43550	38392	43569	42163	41159	39445	44941	44866	42809	40693
14.05	162732	167326	161994	157887	133300	147861	142926	144310	140147	151925	158233	143910	113467	115084	123630	111745	111633	114509	113911	108231	41943	44747	42960	38046	43406	42575	41763	38935	45263	44360	43144	41236
14.1333	163803	165547	161804	152363	131063	147313	143343	140406	138854	148415	156354	143410	114688	117240	123899	112597	110718	118280	116876	105214	41662	44314	43322	38175	43521	42577	41583	39346	45323	44227	42740	40486
14.2167	161957	166840	165428	154739	133631	146916	143035	142289	137887	148173	154765	144303	114969	111696	122538	109380	112695	110449	115654	105505	42241	45104	43669	38341	42958	42880	41838	39131	45841	44452	42650	41306
14.3	161581	162412	159664	155113	132114	145987	144120	141755	135797	148669	159936	141019	115644	117303	122161	109267	111354	113355	114192	107583	42132	44709	43055	38012	43236	42579	41773	39489	45781	44140	42899	41428
14.3833	159893	164119	162784	155817	133505	146715	141308	141291	139199	151131	157173	147761	115300	114367	122122	111211	112192	113603	114689	107805	41939	44714	42970	38012	43296	42511	41391	39336	45158	44820	43032	41280
14.4667	164306	164584	164560	155612	132453	144620	143734	139554	138009	147359	157100	143944	114289	115558	120281	110669	111116	113893	114350	106057	42114	44620	43103	37801	43419	42425	42004	39523	45028	44339	42823	41050
14.55	161889	161419	156897	151411	131973	146356	140177	142775	136669	150849	156071	145206	115082	114037	120443	108895	112142	113262	113948	106783	41243	44657	43376	38438	43177	42194	41849	39834	44748	44723	42892	40639
14.6333	161530	161654	156627	156865	128934	148121	139358	142033	139600	149672	157757	143283	115684	113630	121099	110254	107193	112722	113471	106705	41740	44664	43866	38525	42908	42977	41801	39239	45498	44817	42557	41363
14.7167	161141	162602	160148	153037	133705	143401	142288	141800	137023	148685	157551	145058	114510	114811	121089	111326	111236	113594	114464	104799	42027	45158	43936	37998	42582	42531	41285	39250	45397	44117	42855	41367
14.8	159106	164014	157018	152229	130627	144671	140902	138940	138446	149595	154226	142270	113533	113821	121100	110294	107465	111139	114512	106099	41284	44185	42951	38294	43596	42266	41311	39575	45202	44598	42744	41455
14.8833	159320	165933	160535	154096	128429	148001	142600	140708	136726	149859	157355	144065	113966	111958	120192	109973	111963	116067	113769	107410	41712	44709	43035	38445	43353	42600	41960	39426	45242	44178	42779	41472
14.9667	159208	161980	162266	152976	127932	145719	141161	140619	137214	150074	151714	141835	115271	111132	121524	109402	109349	112212	114866	105631	41677	44637	43408	37630	43001	42743	41628	39294	45306	44716	42620	41364
15.05	159909	161950	158834	151435	130121	145913	140109	138570	137664	143528	155218	143730	111653	114271	119882	109024	109367	110013	112967	105868	41850	44621	43649	37958	42770	42473	41823	39321	45245	44095	42745	40964
15.1333	158189	163749	158458	152214	130989	146725	140758	140931					113701	114649	120050	108367	107028	112596	112366	104087	42052	44247	43154	38273	42972	42468	41618	39302	45339	44230	42897	41477
15.2167	159949	158867	162012	150776	130458	141841	137183	139718					111118	114459	118411	108425	109567	109194	111329	107274	41207	44787	43411	37946	42616	42039	41802	39435	45288	44326	42458	40972
15.3	160429	160600	155980	150948	126612	145162	138054	138024					113475	114665	123612	109572	110368	112511	116619	108120	41409	44522	43558	38542	42922	42403	41270	39754	45211	44145	42150	40927
15.3833	154782	160295	156251	152070	130884	147667	140710	137509					115412	113503	120919	110740	110550	110828	116815	106341	41647	44216	43089	38325	42939	42274	41773	39568	45624	43947	43065	41271
15.4667	158997	158649	157539	153003	130373	143630	137883	136998					109747	114614	118782	109973	111046	113446	109619	107007	41577	44041	43230	38652	42625	42731	41502	39555	44902	43774	43190	41355
15.55					128696	142466	137186	138454					111539	112645	121256	109061	109630	112854	112829	107217	41333	44343	42838	37953	42925	42441	41648	39448	45392	44847	42860	41669
15.6333					128604	141932	140772	138226					112158	114453	120548	109072	109149	113797	113269	104002	41067	44846	43191	38346	42527	42385	41499	39153	44865	44111	43262	41613
15.7167					132736	142891	140163	134533					112149	113022	117455	109374	106394	109313	113440	106383	41377	45180	43597	38161	42264	42446	41542	38993	44717	44225	42659	40999
15.8					131599	140441	141389	138451					110978	113447	122265	108613	109229	112752	114681	106727	41327	44742	43466	38332	42969	42539	41716	39694	44970	44713	42721	41112
15.8833					126476	142932	138418	139937					111019	114543	119509	112458	109887	114765	112241	106267	41558	44588	43452	37991	42755	42070	41235	39294	44937	44301	42487	41380
15.9667					127003	144775	138567	137987					110542	113279	123091	112596	109426	110980	116106	106363	41368	44486	42665	37821	42730	42197	41737	39725	45214	43387	43025	41703
16.05					128674	142815	141233	136517					110814	110058	122036	109782	110057	110291	114056	106550	41013	44575	43266	38532	42852	42448	41191	39307	44851	43841	42787	41120
16.1333					127092	141187	135129	137240					110520	112373	120938	110000	109447	111883	111845	107518	41849	44090	43434	38692	42758	42120	41858	40036	44952	44085	42718	41446
16.2167					129293	141977	137800	137563					111467	112514	119228	110475	108415	112566	113416	107197	41376	44381	43085	38189	43149	42235	41752	39412	44625	43941	42695	41024
16.3					125098	140441	138056	136528					112472	111314	117300	106651	109604	112516	112985	105064	40989	44537	42941	38468	43083	42355	41608	39937	45330	43809	42696	41274
16.3833					126413	138493	138172	135156					111425	110929	120155	109848	108147	110142	114192	104639	40827	44445	42892	38483	42714	42003	41636	39520	44574	44263	42846	41288
16.4667					123617	138171	136902	136943					110478	109906	118346	110363	109643	108834	112832	105167	41222	44572	42839	38397	43218	42276	41184	39556	44509	43776	42540	41794
16.55					126041	138839	137856	137488					113152	111363	118788	109066	105063	111813	110789	104940	41048	44584	43110	38665	42552	41951	41543	39544	44972	43848	42669	41202
16.6333					124565	138043	133900	135923					113442	112389	118893	107035	108840	111514	108943	104008	41067	44875	43406	38770	42235	41854	41262	39652	45369	44077	42483	41472
16.7167					125403	141818	135248	136371					110466	110661	120703	106796	106423	109152	114845	105024	41444	44723	42931	38460	42482	42224	41491	40416	44613	43698	42627	41103
16.8					126749	138236	136549	137833					109315	110743	122585	108434	108178	111856	111707	105004	40615	44720	43246	38940	42812	41899	41323	39486	44490	43060	43277	41722
16.8833					126752	137369	136834	136892					110182	111737	118523	108261	107463	108657	113248	106094	41377	45146	43481	38185	42664	42527	41891	39602	44399	43892	42552	41556
16.9667					125800	137878	139872	135361					113220	109456	119280	107844	107634	108837	111643	106209	40891	43789	42564	38308	42686	41916	41372	39453	44452	44035	42960	41446
17.05					127162	138762	135604	137658					108975	109637	121008	108929	107740	110754	111420	105723	40920	44024	43778	38620	42356	42483	41618	39151	44670	43970	42248	41228
17.1333					121562	138669	138608	134451					109397	109515	119171	107519	108606	111993	111684	105270	40435	44574	43483	38397	41989	41988	41237	39850	44281	43706	42621	41658
17.2167					126342	139592	135836	136456					112103	110310	121313	107020	105004	112431	110950	105605	41115	44229	43170	38310	42305	42388	40967	39524	45018	43573	42059	41272
17.3					125538	140332	134271	133504					111743	108492	116263	110359	109367	107566	111235	104388	40993	43819	43008	38603	42166	41947	41537	39554	45170	44229	42833	41692
17.3833					125618	139140	134025	134283					110765	108859	119512	107245	107781	109055	111286	105121	40476	44211	42784	38537	42582	42089	41487	39732	44375	43921	42816	41406
17.4667					124291	136251	137083	136039					106005	109756	116940	107455	108047	109703	109560	105137	40924	44409	42822	38446	42118	41880	41552	39556	44638	43535	42596	41384
17.55					123384	140239	132363	132570					109421	110411	118740	107586	104390	108823	110960	106307	40428	44453	43274	38513	41771	41784	41444	39873	44666	44336	42667	41140
17.6333					124210	137931	134391	133779					112265	111258	117506	108856	107521	111774	109104	105086	40659	44918	42746	38683	42345	41763	41203	39568	44933	44073	42731	41407
17.7167					123020	137460	132876	131655					109435	110398	118312	108432	107739	107676	112474	104631	40490	43979	42886	38105	42213	42167	41590	39646	44477	44203	42289	41838
17.8					123296	137501	134992	132784					109534	111595	118029	108455	107431	111357	110610	105029	40676	43832	42558	38709	42360	42170	41318	39872	44177	43539	42592	41416
17.8833					122595	136779	133413	132680					111334	109012	115956	108745	106374	112710	112029	105996	40981	44764	43087	38068	42242	41687	40904	39195	44415	43781	42370	41828
17.9667					124813	135247	136692	131479					106257	108839	116826	107518	106997	110597	112813	105530	40184	44549	43290	38130	41881	41526	40937	40017	44724	43907	42981	41454
18.05					122134	136588	135427	131314					106565	109739	120397	107341	105235	106090	110955	105435	40248	44336	43184	38588	42196	41673	40637	40064	44838	43789	42716	41786
18.1333					122829	134736	134086	133575					108293	109211	117859	106092	105606	110939	112979	104650	40646	43641	43150	38411	41799	41704	40896	39204	43862	44250	42134	41698
18.2167					122483	138301	135468	131194					107810	110178	117097	107080					40103	44047	42541	38367	41858	41368	41343	39690	44383	43880	42080	41863
18.3					123495	132596	136445	130846					107112	110275	115704	106598					40474	44450	42827	38298	41904	41900	41156	39618	44216	43945	42355	41047
18.3833					117912	132114	131103	132488					107810	108929	117809	106935					39981	43755	43312	38576	41322	41967	40717	39686	44536	43737	43029	41095
18.4667					120867	135227	134713	133730					109849	111107	116824	109167					40097	44201	43237	38169	41731	41694	41169	39584	44021	43687	42933	41793
18.55					121193	134547	133336	130534					110837	106510	114860	107575					39940	44616	43027	38555	41840	42346	40890	39789	43913	43735	42986	41573
18.6333					121778	133251	135864	130689					109018	109192	116367	108460					40324	44480	43154	38275	42356	41745	41415	40005	44126	43821	42489	41405
18.7167					120370	134260	132405	131398					108602	111067	116709	106571					40140	44149	42761	38433	41656	41782	41186	39445	44492	43317	42579	41453
18.8					121375	130594	132654	128050					108273	109222	115012	106651					39576	43721	42595	38375	42417	41481	41328	39850	44187	43520	42672	41533
18.8833					119634	132452	129987	132601					106532	108976	116435	106313					40363	43632	43208	38613	41363	41898	40942	39721	44416	43490	42305	41376
18.9667					121120	135216	133521	129818					108842	107110	117982	106821					40065	44308	42693	38356	41674	41349	41205	39694	44202	43577	42375	41620
19.05					122979	131709	132211	130494					105855	110443	117879	105275					40264	44358	42609	38497	41708	41805	41028	39522	44192	43532	42537	41372
19.1333					119990	136799	132271	132609					107425	109418	115848	109543					40293	43585	43329	38720	42204	41809	40708	39739	44303	43344	42273	41762
19.2167					118188	134082	130729	131679					106156	108023	113343	108732					40164	43988	42149	38616	41418	41592	41135	39153	43990	43011	42760	41327
19.3					118482	134310	130608	130713					105582	109144	115768	106285					39749	44075	42462	38369	41651	41294	41287	39648	44327	43706	42490	41354
19.3833					119638	132343	132286	131447					106914	106239	117141	108274					39847	43494	42760	38706	41958	41890	40532	39580	43985	43485	42267	41734
19.4667					117716	133069	132100	128920					107195	104696	114729	107402					40254	44103	42835	38554	41766	41308	41344	39911	43967	43947	42352	41300
19.55					121472	131339	131335	128288					105482	109099	115025	107036					39368	43626	42498	38252	41847	41522	40662	39561	44107	43825	41774	41688
19.6333					122541	133360	130731	128487					106959	108034	113895	106250					40132	43659	42968	38418	41750	41816	40886	39877	43722	43176	42682	41673
19.7167					117913	130263	130123	127548					106512	107651	115487	106738					40162	43791	42895	38655	41227	40726	40907	39526	43630	43336	42145	41327
19.8					116473	133882	132696	130880					106552	106009	113434	106889					39405	43620	42422	38199	41658	41013	40986	39621
19.8833					118505	133431	131429	127996					106052	106066	114825	106376					39932	43938	42255	38308	41502	41532	41296	39152
19.9667					119228	131722	132954	128144					106760	105137	113922	106039					39786	43791	42214	38798	40921	41483	40940	39014
20.05					119365	132132	132775	128553					105955	106350	115789	105354					39537	43636	42577	38690
20.1333					117193	131478	127413	129435					105694	105010	113702	106551					39725	43777	43062	38709
20.2167					116794	131201	132116	127660					103766	106934	113512	106374					39425	43709	42892	38072
20.3					116060	131594	125737	123512					106987	108352	114249	106450					38964	43464	42256	38154
20.3833					116110	129120	130640	128090					106412	107172	113390	105854					39541	43296	42240	38517
20.4667					115342	132562	129494	126256					108622	106711	114243	105748					40227	43417	42314	38191
20.55					118774	133627	128328	131543					105570	106673	118181	106344					39197	43242	42940	38728
20.6333					116094	130672	128303	127086					105966	106879	112265	105650					39215	43389	42045	38312
20.7167					115090	132302	130629	125691					105936	106923	114796	105759					38880	43672	42695	37839
20.8					118355	129217	130190	129883					104672	108248	115255	106217					39604	43590	42230	38414
20.8833					115371	128474	130739	125579					105697	108192	114232	104058					38795	44062	42737	38216
20.9667					118558	131774	130984	126711					106513	105650	113806	105882					39272	42859	42707	38053
21.05					114847	128367	127950	124189					107105	105805	115108	106455					38998	43329	42200	38413
21.1333					116875	129948	126418	127391					104895	104953	114033	105483					38856	43327	42267	37774
21.2167					119098	131753	126681	124739					105360	105435	115680	105250					39517	42892	42633	38928
21.3					114415	129726	130543	124445					105092	106721	111624	104551					38983	43922	42548	38424
21.3833					115591	128292	125605	125458					105012	105040	111739	105529					39699	42977	42098	38114
21.4667					115640	131519	130024	126911					104523	105485	111569	104003					38910	42938	42001	38058
21.55					115377	129595	128505	127844					105420	105579	115074	104716					39031	43231	42120	37919
21.6333					116599	128169	129564	121868					105322	105378	111707	104759					38891	43386	41954	38229
21.7167					113401	128790	130259	123560													38247	43046	42091	38456
21.8					114220	125613	126788	123533													38549	43201	42046	38152
21.8833					115542	129650	127990	124824													38386	43371	42155	38037
21.9667					116404	127961	128708	124094													38761	42893	42041	38380
22.05					113810	129114	127222	124160													38519	43029	42128	38082
22.1333					113535	125660	128200	123620													38810	43076	42094	37905
22.2167					111576	125616	126779	123208													38711	43178	42030	38329
22.3					113761	126965	125834	122086													38483	42836	41714	38347
22.3833					113313	130984	128744	121414													38568	43369	42429	37912
22.4667					113584	126097	125710	120919													38451	43350	41966	38502
22.55					112853	124042	127470	123382													38100	42588	41934	38202
22.6333					114868	128759	124431	122609													38492	42995	41409	38372
22.7167					113321	125805	125882	122370													38791	43225	41894	37988
22.8					115143	125406	126744	125211													38653	42867	42083	38296
22.8833					113430	126588	125301	123786													38433	43012	41248	38398
22.9667					113082	125332	125534	124211													38296	42873	41810	38184
23.05					112705	126190	124919	123791													38224	42705	41768	37896
23.1333					114087	126678	125616	121272													38417	42840	41831	38189
23.2167					110424	126263	125654	120424													37983	42764	41572	37645
23.3					112066	125043	125931	122340													38162	42824	41656	37596
23.3833					114885	120981	125644	122803													38445	42693	41942	37884
23.4667					109547	126706	128207	120995													38029	42659	41748	38098
23.55					110821	126462	126787	123264													37709	43012	41439	37712
23.6333					113529	122918	124329	120807													37680	42723	41678	37777
23.7167					110773	126383	123626	122960													38183	42582	41513	37984
23.8					112315	122873	123988	118375													37711	42759	41253	37556
23.8833					109294	125089	128855	119737													37893	42673	41047	37965
23.9667					111455	123293	123479	117670													38077	42468	41037	37887
24.05					110221	126342	123364	120479													37753	42781	41263	38084
24.1333					110191	124919	124212	121174													37685	42463	41433	37669
24.2167					108825	122619	126079	120567													37986	42463	41185	37649
24.3					108544	121178	123052	120517													38025	42532	41499	37411
24.3833					108173	123168	122663	118998													37693	42742	41831	37618
24.4667					109012	123421	123104	117695													37440	41585	41749	37357
24.55					110382	122115	121727	117697													37524	42070	41124	37661
24.6333					112032	124534	124139	116768													37544	42033	40921	37505
24.7167					111899	123457	121813	117167													37440	41613	41464	37582
24.8					110782	123223	124577	120520													37014	42077	41623	37664
24.8833					108188	121699	121055	117391													37461	42135	41548	37527
24.9667					109831	123910	123777	119977													37010	42419	41286	37172
25.05					109799	123769	121413	117338													37441	42015	40942	37371
25.1333					108136	120645	123152	121774													37203	41616	41730	37687
