# Supplementary material for: Rate-limiting transport of positively charged arginine residues through the Sec-machinery is integral to the mechanism of protein secretion
Source: eLife. 2022 Apr 29;11:e77586. doi: 10.7554/eLife.77586 (PMC9110029; doi:10.7554/eLife.77586)
Supplement: Figure 6—source data 4. [file elife-77586-fig6-data4.xlsx]

## Sheet: Sheet1
	pH 7	pH 7	pH 7	pH 7	pH 7	pH 7	pH 7	pH 7	pH 7	pH 7	pH 7	pH 7	pH 7	pH 7	pH 7	pH 7	pH 6	pH 6	pH 6	pH 6	pH 6	pH 6	pH 6	pH 6	pH 6	pH 6	pH 6	pH 6	pH 8	pH 8	pH 8	pH 8	pH 8	pH 8	pH 8	pH 8	pH 8	pH 8	pH 8	pH 8
time from injection (min)	LDDD	DLDD	DDLD	DDDL	LDDD	DLDD	DDLD	DDDL	LDDD	DLDD	DDLD	DDDL	LDDD	DLDD	DDLD	DDDL	LDDD	DLDD	DDLD	DDDL	LDDD	DLDD	DDLD	DDDL	LDDD	DLDD	DDLD	DDDL	LDDD	DLDD	DDLD	DDDL	LDDD	DLDD	DDLD	DDDL	LDDD	DLDD	DDLD	DDDL
-8.1	15452	23916	21471	21250	75732	85951	110524	101627	111645	109752	140112	145625	107360	84167	147372	109188	7159	8244	14578	11696	16459	14570	25658	25340	15502	17579	28927	19451	143004	118036	160755	142979	26340	20601	26249	26853	306385	305322	340455	248252
-8.01667	17591	25254	24492	22739	80607	89694	115822	105758	117921	118812	147647	153884	110220	88792	152961	115718	7933	8815	15902	12721	17615	15972	27912	27258	17250	19144	30904	21023	146740	125687	168293	152008	27681	22273	28072	28781	327812	315970	352911	269229
-7.93333	19506	26194	26987	24766	85633	93105	119587	110080	128704	122797	157870	165159	115192	93543	161177	123290	8566	9728	17198	13725	19389	17172	30158	29288	18559	19935	33004	22710	152677	130549	175627	158650	29086	23799	29863	30716	338928	337240	369460	289207
-7.85	21409	27956	29524	26507	90054	96153	122971	116190	133228	133041	164220	175186	122502	97607	168349	129007	9410	10418	18213	14867	20787	18930	32387	30742	19636	20729	33962	23660	159053	133003	183883	161174	30631	24815	31249	31903	353849	357205	384590	309540
-7.76667	22613	28944	30688	28424	93877	99541	127917	117401	140315	141799	172697	182258	127429	101337	173299	133477	10087	11152	19379	16039	22051	20131	34614	32245	20660	21798	35492	24772	161293	135241	183917	168049	31286	26520	32386	33138	370926	375157	400515	325719
-7.68333	24538	30294	33147	29698	97413	102593	130365	122579	146040	145464	177739	189202	126743	105592	175408	138491	10347	12177	20404	16702	22956	21329	36000	33598	21919	23273	36975	26322	165205	143643	191654	176953	32594	27425	33822	34302	381407	383601	415665	345752
-7.6	25589	31183	34064	30301	101279	105177	134994	124207	152923	152110	189924	191445	131762	110191	181152	144410	11411	12313	21640	18099	24172	22323	37776	35812	23159	24428	38137	28160	167019	145868	192176	182354	34164	28714	35558	36180	392291	400816	424846	357737
-7.51667	27180	32483	35338	31664	104077	106052	139456	128508	159303	159795	190368	199987	138311	110785	187236	148476	12066	13390	22705	19376	25286	23738	39441	36956	23959	25620	39363	29241	171805	151018	198281	187298	35316	29792	36982	37353	403383	418691	429627	365579
-7.43333	28004	32980	37233	32668	104179	109546	143646	130235	165198	161007	197611	206128	139039	115274	185492	154559	12469	14344	23783	20210	26061	24544	40911	38367	25176	26359	40452	30631	179209	154295	198611	186582	36686	30941	37826	38115	412214	427322	438426	387583
-7.35	29124	33892	37619	33324	109643	111301	145460	136534	171013	169689	201508	212299	145547	117426	192885	157878	13186	14844	24451	20782	27770	25933	41920	39992	25890	27324	41325	31311	180354	156174	207514	195347	37422	31721	38776	38966	421094	445609	455580	397602
-7.26667	29982	35122	39351	34735	112316	115377	148249	140979	172759	172265	208234	214698	150154	123588	197585	164527	13735	15313	25440	21437	28236	26983	43591	40954	26805	27445	42859	33073	183868	165168	207122	194079	38496	32994	39444	40381	437072	446599	455885	406678
-7.18333	30631	35568	39688	35471	116244	118107	149903	141162	178960	177393	213465	218154	149937	123948	200494	165283	14618	16370	26540	22813	29987	28301	44760	42569	27952	29125	43565	33636	187830	164983	212359	200565	39282	33871	40365	40928	445801	459550	470687	417828
-7.1	31854	36602	41020	36458	118043	115648	153365	144247	183320	179661	215803	222289	156590	128342	199927	170544	14994	16898	27014	23442	30444	29307	45905	44136	28329	29904	44761	34641	186400	165987	214326	209104	40109	35305	42629	41942	451098	480379	473370	433728
-7.01667	33033	37206	41819	37190	120222	121508	154327	147609	187741	185148	219436	230569	154965	130722	206574	173006	15786	17302	27833	23981	31320	30386	47955	45210	29617	30552	45826	36361	196004	168118	218206	210642	41891	36086	42951	43203	458838	485253	481094	433660
-6.93333	33605	37447	42877	38352	118212	119826	158943	147660	190998	193416	228660	234425	159790	132324	208903	176616	16180	17865	29246	25087	32579	31188	48953	46377	30195	31704	45943	36993	198695	174061	222742	213310	42835	37030	43621	43613	467665	489391	485878	443160
-6.85	34561	38507	42721	39268	123343	122219	157711	150313	197131	194926	230145	240658	166537	133367	207712	178605	16901	18529	29722	25848	33564	31903	49904	47541	31212	32395	47467	37589	196937	179234	224300	218125	43232	38198	44957	44617	474731	496411	504612	453998
-6.76667	34797	38465	43937	39408	123360	125869	161953	157006	201837	199022	232667	242454	164019	139434	217100	178781	17502	19498	30562	26565	34063	32972	50645	48473	32227	33145	48733	38750	195929	177860	221472	219352	43975	39263	45432	45569	481444	510382	501674	464342
-6.68333	35721	39308	45012	40429	125897	128551	164680	153376	198791	199305	238587	243072	170985	139423	219541	184258	17831	19837	31353	26967	35387	34311	51848	50053	32921	34033	48950	39537	198936	183628	229269	221750	44562	40066	45669	45609	484483	516210	510252	478226
-6.6	36093	40524	45936	40769	127681	131050	165615	157691	206804	206849	241920	251525	173678	141009	218514	184168	18572	20296	31901	27680	36041	35028	52617	50123	32964	34574	49357	40089	204725	185414	229850	227307	45773	40623	46997	46938	493745	523677	516440	479205
-6.51667	37270	40869	46205	41075	131710	131922	165883	161043	205991	208556	243623	249955	170348	144784	224051	193279	18778	20872	32833	28459	36597	35817	53433	51586	34134	35774	50398	41663	205661	188989	234485	223648	46522	41955	47579	46532	496446	541325	520409	484919
-6.43333	37849	40870	47017	41946	130550	133517	170414	158631	214054	208700	248326	255841	180426	149205	229570	190279	19736	21295	33153	29137	37250	36492	54456	52329	34506	36165	51414	41944	208163	187472	234450	231028	47273	43028	49029	47849	498392	536846	523347	496216
-6.35	38386	42022	47513	42752	134244	135957	170440	161621	215272	212239	247708	262144	181658	147871	230955	196959	20049	22220	33872	30023	38532	37588	55818	53718	35507	37093	52122	43196	213497	194387	237304	235147	47597	43973	48884	48518	511336	549183	531731	504424
-6.26667	38731	41963	47761	42911	132312	137247	173854	162305	218415	216523	250140	261885	183315	149524	234608	197697	20644	22659	34552	30273	39942	38610	56398	54414	36082	37181	52340	43668	210603	194676	235693	237620	48823	44670	49897	49026	512052	554380	536864	507180
-6.18333	39148	42734	48816	43814	137142	139977	176094	165099	223340	217705	257268	262490	184963	154559	232611	199564	21371	22975	34856	31224	40546	39522	57420	54898	36732	38549	52899	44037	215074	197171	240376	236479	49320	44889	49943	49462	517908	559708	536795	512009
-6.1	39611	43565	49055	44140	137417	139901	175486	165702	224787	220295	255779	262450	187776	154335	234595	199014	21746	23571	35807	31723	40857	40035	58100	55798	37682	39090	53668	45403	219924	195340	235083	239749	50673	46558	50448	50215	520500	567572	542032	520661
-6.01667	39813	43819	50034	44851	141422	139736	177363	169685	229610	222416	258136	268298	187718	156834	236025	202302	22213	24343	36166	31969	41760	40677	58320	56629	38638	39177	54238	45617	216616	199967	241896	239316	50877	47240	51616	51148	522652	576161	550023	525413
-5.93333	41097	44343	50300	45613	139463	142495	176056	171055	225793	227298	259490	268720	190534	160040	238323	206737	22631	24593	36761	32773	42553	41158	59871	57997	38403	40057	54731	46252	222104	202130	244410	245081	51417	47789	52423	51148	542267	581201	553180	529304
-5.85	41572	45423	50679	46166	141521	140076	179026	171879	233604	227192	264722	272845	192891	161755	240007	206853	23335	25187	37960	33190	42809	42038	60080	58386	39012	40408	55460	46965	221507	208910	244150	248787	52131	48050	52645	52203	537446	585914	550606	530195
-5.76667	41943	45263	51257	46238	142514	141978	181068	173180	233476	229993	263308	274225	194890	161893	243172	209917	23266	25583	38025	33948	43886	43175	61220	59306	39416	41763	55473	47518	223664	206503	247946	247650	52800	49590	52842	52114	541329	592101	557276	541011
-5.68333	42685	45836	51997	46593	145733	143740	183369	176454	237999	233339	267576	278459	198645	165742	249353	209829	24575	25860	39048	34773	44691	44465	61292	59456	40177	41593	56633	48033	226174	208582	253338	248279	53248	50327	54065	52574	550560	595158	559600	549705
-5.6	42472	45829	52286	47119	148548	145877	182516	175937	238553	237786	273496	281690	199245	167108	246816	214630	25024	26835	38734	35030	45287	44615	62366	60863	40873	42372	56805	48297	227420	209622	251679	251752	53715	50640	54811	53387	552779	600624	563354	551230
-5.51667	42880	46867	52348	47354	147515	144804	182355	177396	243869	233870	274580	281442	203250	167108	251579	215335	25264	27243	39578	35781	45804	45530	63350	61344	41472	42901	57465	48907	235539	213690	251538	254865	54745	51523	54947	53899	553839	604070	568431	554087
-5.43333	44047	46691	53193	47882	145190	149807	184572	181379	247486	240701	271107	286715	200242	170979	255626	219313	25384	27765	40393	35852	46710	46434	62825	61706	42036	43266	57984	50083	231940	214383	256323	252587	54682	52873	55438	54207	568001	606158	570880	555795
-5.35	44183	47306	53831	47790	152131	151375	187806	179706	244814	243312	278367	285401	205160	174905	253329	216701	25899	28366	40772	36781	47256	46671	63957	62292	42435	44438	58261	50617	234017	215739	252445	256582	54776	52793	55283	55093	559283	617558	576982	569727
-5.26667	45004	47270	54212	48581	150339	152713	190612	186927	245453	241305	277527	287260	207084	175282	252986	219557	26669	28472	41479	37200	47344	47899	64930	62667	43262	44438	58801	50952	236289	216669	257706	258764	56033	54098	56589	55088	564071	620966	574215	562214
-5.18333	45364	48162	54944	49019	152701	153110	188373	180560	252099	246734	282965	291765	208715	176825	258148	224379	26746	29373	41597	37246	49258	48211	65454	64195	43313	45311	59248	51755	235506	220967	257349	258478	56063	54048	56377	55325	569291	621482	577311	573851
-5.1	45806	48206	54850	49162	153444	156344	186857	186313	250311	246668	282636	297415	210544	177824	260618	222912	27202	29261	42495	38235	49402	48180	66581	64385	43980	45739	60196	51804	240841	215845	253716	261985	57400	55045	57435	55519	571436	631604	577189	572737
-5.01667	45844	48675	55342	49627	154123	154234	190019	186080	257468	250320	283683	292714	207894	177052	256876	228630	27692	29785	42691	38482	49831	48739	66823	65298	44067	45615	60146	52623	239873	223537	256940	264121	57227	55591	57669	56000	574136	638389	585410	571473
-4.93333	46590	49043	55106	50020	154133	153101	192770	185864	257837	255563	287204	295944	216279	179950	260868	226291	28148	30057	43350	38738	50053	50265	66857	65714	44221	46813	60566	52576	241525	223063	264022	262702	57919	56137	58746	56847	575903	633081	587167	583917
-4.85	46475	49010	56432	50713	159175	156881	190273	188195	255904	250729	294019	304991	213404	183806	261382	230182	28629	30828	43769	39501	50796	50629	67599	66435	45633	47737	60721	53505	243909	225358	257525	267858	58492	56773	58597	56825	574872	644240	590306	590728
-4.76667	47437	49534	57070	50347	155170	157085	194774	186855	257594	257472	291740	300620	217205	180752	265309	232798	29076	30971	44236	39876	50917	50984	68310	67172	46093	47759	61095	53632	241167	229126	265958	268062	59511	57002	59713	57514	586728	639150	593914	587212
-4.68333	47744	49996	56797	50795	159973	158255	195311	189963	263239	257223	291053	299927	217659	180500	266738	231260	29112	31838	45033	40755	52317	51971	68555	67024	46643	48175	61670	54080	242950	229329	258619	267577	58778	57785	59344	57747	597098	644505	600850	589315
-4.6	48394	49954	57192	51779	161994	158989	197271	192217	260415	255968	291205	300723	216754	187554	269969	233113	30030	32068	45197	40889	52603	52088	68501	68527	46317	48527	62781	54794	246695	234091	264861	266803	60900	58191	59830	57373	591306	658105	595044	589844
-4.51667	48094	51421	57317	51817	160470	159721	194461	194571	260076	260725	294695	308473	221248	189574	266793	236229	30479	32237	45373	41253	53385	53071	69580	68189	46695	49608	62729	54749	250407	235236	262110	275460	60908	58812	60556	57892	587755	651667	594809	594387
-4.43333	48487	50502	57815	52166	163469	160743	201236	193115	265039	262696	298325	307016	223796	190756	273239	235291	30463	33128	46015	41923	53057	53796	69834	68889	47520	49404	62465	56020	250051	235088	266060	271224	60732	59160	61475	58767	597262	662802	602859	597410
-4.35	48335	51652	58081	51938	163295	160672	195771	193116	266941	261345	298337	309856	225159	191564	273352	239738	30938	33217	46144	41660	53894	54033	69991	69437	47945	49750	63180	56398	251861	237577	262050	272031	61101	59878	61289	59076	597382	665134	597860	601000
-4.26667	49299	51718	58641	53020	162138	159765	200259	192134	270957	263349	303223	312004	225114	193428	271161	237185	31706	33571	46575	42686	54462	54639	70594	70028	48382	50068	63744	56390	256468	237245	267592	268089	61016	60975	62015	59665	601666	658968	604156	604169
-4.18333	49943	52006	59140	52654	164299	160997	200597	192340	268712	272078	305024	309709	226636	193753	272091	244434	31727	33999	47343	43256	55064	55285	71439	71262	48697	51696	64367	57348	257557	241782	265704	275624	62309	61426	62385	59285	601317	661755	612399	611173
-4.1	49738	52319	59363	53626	166658	162948	199786	195031	273300	266059	305171	309782	227646	191133	276906	242001	32312	34274	47160	43113	55819	56081	71827	71163	48852	51758	64949	56808	254868	233995	270525	275887	63253	61403	62415	60535	605850	661925	611704	610296
-4.01667	49824	52483	59119	53117	169516	167108	199382	194208	273067	270860	303945	314319	230071	199716	276517	246037	32293	34914	48557	43346	56414	56714	72300	71594	49225	51458	64100	57688	256885	239132	269314	275898	63145	62342	62307	60511	601465	671358	612698	614904
-3.93333	50656	52363	59651	53827	165140	167941	201134	194839	275364	271821	308031	317551	228136	200833	277996	245062	32893	34891	48367	44094	56610	56994	71791	72410	49574	52101	64402	57974	257113	242663	272806	272055	63329	63452	63228	60583	613387	670486	613440	617278
-3.85	50950	53547	60536	54244	164951	168998	200291	198384	275478	274462	307080	314051	234135	201021	282757	244037	33365	35750	48276	44790	57658	57260	72888	72250	50022	52617	64886	57815	253566	246660	269401	278576	63735	63233	64286	60736	617149	670587	612476	613612
-3.76667	50881	53317	60394	55019	166044	168354	199049	194906	275722	275575	308085	317482	232496	203315	281449	246945	33682	36352	48931	45322	57068	58106	73076	73271	49759	52802	65497	58301	257763	249451	273990	280628	64036	64013	63450	61563	612862	668037	617682	614961
-3.68333	51607	53312	60855	54942	169070	169791	205247	198434	275550	272298	312598	318340	233258	199943	284085	247092	33824	36481	49078	45606	57647	58373	74076	73151	50859	53850	65401	59149	259694	250646	272447	281240	64303	64870	64056	61802	618114	671208	618713	621107
-3.6	51467	53945	60713	54557	166591	169782	209171	199056	281188	275718	310953	320860	233784	205771	281399	249563	34308	37060	49511	45856	58388	58284	74505	73881	50729	53624	66197	58662	264424	243393	270852	278401	65609	64975	64855	62159	611991	681815	611362	620164
-3.51667	52693	54287	60549	55874	166478	168109	208778	199709	283289	276200	314679	329394	234866	204386	288512	252671	34668	37679	49619	46202	58647	59151	75270	74173	50877	53853	66173	59317	262248	247976	273306	281238	65281	65135	64629	61774	619730	683710	618554	620992
-3.43333	52575	54518	61393	55459	169992	169941	207814	200835	281627	280898	316188	322934	239109	206213	284836	258374	35175	37501	50250	46680	58825	59631	74685	74995	51273	54199	66798	59503	263927	250025	276107	280200	65711	66633	65180	62692	622512	685811	617004	626639
-3.35	53072	55016	61684	55951	173611	171417	208482	198820	282497	282587	314699	326553	239927	206623	283372	253437	35371	38013	50828	46883	59522	60595	75358	74912	51019	54137	66151	60074	265155	255149	277172	278689	65983	66190	65516	62516	621866	696616	622349	623971
-3.26667	52949	54739	62301	55919	176643	172669	207302	203119	280930	282040	316708	325079	239934	205597	287236	257245	35814	37848	50832	47827	59814	60761	75987	75660	51395	54750	66605	60489	261983	247357	279459	277711	66786	66977	65396	63292	625310	685967	618244	623868
-3.18333	53725	55274	62630	56190	174215	171331	208822	205746	285019	286470	318710	327616	238178	207724	294342	254584	35635	38509	51733	47678	60617	61295	76514	75870	52075	54993	67780	59938	268174	256517	272968	279108	66685	67396	66228	62648	618913	696212	618905	620579
-3.1	53725	55582	62596	57327	177711	173963	206612	202213	282279	284896	314149	328044	246207	210579	296509	256430	36258	38525	51957	48011	61135	61327	76476	76244	52728	55364	68438	61491	269055	254441	278754	279807	67346	67918	66211	62760	627374	695390	614016	630824
-3.01667	54087	55647	62699	56916	175353	177914	209465	203411	287487	290412	319035	333548	243543	212747	295751	261528	36737	38604	52366	48335	61973	62308	76587	76429	52949	55410	67414	60752	269931	257375	277609	277868	67053	68585	67359	63720	626021	687134	622231	633435
-2.93333	54050	56122	62819	57027	173350	176252	208865	207772	291724	290960	321131	329531	240532	217083	289478	259948	36764	39370	52255	48857	61726	62139	76686	76950	52539	55825	67651	61397	267714	259984	276727	282658	67342	69086	67414	63400	625678	696530	618862	629893
-2.85	54539	56085	63230	57726	174397	178897	208816	206543	292279	287034	321011	333498	245633	214406	291699	265082	37585	39623	53126	49286	62379	62470	77504	77357	53502	55732	67497	61126	267665	256013	277662	282687	67747	68993	68411	63852	632701	687618	624807	627617
-2.76667	54406	56479	63987	57897	174659	177916	211366	207108	293484	289017	322360	333419	246612	210042	293685	261231	37670	40318	53477	49432	62345	62828	78200	77752	53394	56481	67494	62047	267384	254960	277642	284491	68547	69770	67775	63726	630440	697766	625949	634305
-2.68333	54787	56848	63379	58045	175259	171674	212612	209770	287777	294250	326945	332452	247358	216775	292920	261657	38139	40144	53578	49595	62793	63437	77819	79212	54224	56325	68646	61926	270477	256557	284763	292190	68612	70001	68107	64861	624207	693493	622671	628436
-2.6	55798	56492	63889	57886	179782	180817	212714	208746	295362	290005	324249	336196	247554	214704	295006	265239	38675	40509	54105	49726	63340	64220	78569	78551	54555	56639	68949	61877	271916	260850	281080	289845	69233	70197	68514	65041	633529	698574	618241	632715
-2.51667	55702	57118	64364	58499	178510	178778	209715	209913	293716	295734	326761	333481	251251	216150	297003	269699	38576	40988	53735	50938	63270	63522	78686	78284	54223	57010	68370	61935	274321	260845	283761	285464	68890	70902	68712	64576	628440	696283	621069	642146
-2.43333	55821	57648	63778	58774	177053	178102	213874	209614	297513	291449	322519	335039	247209	221194	299769	267143	38666	41526	54477	50067	63677	64557	79154	79178	54762	57982	69431	62469	272313	265535	278810	288368	68256	71279	68719	64566	632054	702694	628832	632078
-2.35	55765	57752	64589	58634	178483	180532	210842	212046	292189	289891	324820	335115	250406	220548	300397	267006	39239	41322	54167	51106	64870	65114	78415	79712	54422	57841	69226	62996	275852	260844	285171	287522	69695	71987	69266	64795	628227	703828	626232	633217
-2.26667	56606	57429	64690	58402	176834	180909	212045	211446	298197	298675	332047	338095	250864	220784	301644	266442	39272	41587	54339	51411	64886	65462	79973	79968	55197	57052	69153	62577	276820	261056	282945	287757	69829	71777	69039	64295	631200	708497	627768	631642
-2.18333	55884	58002	65309	58878	179291	181072	213515	212389	295843	295894	325740	343669	256686	221702	301171	270753	39369	42638	55108	51473	64392	66179	79253	80457	54905	57804	69184	63663	279272	263645	282360	282384	70088	72213	69984	64797	637180	713492	629107	633093
-2.1	56124	58475	65690	59005	181922	182970	218090	207967	297124	299935	330436	336016	252910	222614	301527	273024	39850	42785	55491	51661	64855	66265	80075	80478	55659	57675	70321	63482	276323	266772	282500	293977	70478	73140	70203	66059	632703	705915	633747	644464
-2.01667	56621	58380	65890	59794	181340	176968	215127	214631	301294	297981	330769	341622	259378	223348	300615	271718	40136	42359	55279	51790	65635	65613	80402	80914	55543	58211	69891	63213	278305	265533	282343	287733	70413	73429	70477	65462	633493	713649	634037	634947
-1.93333	57125	58479	66001	59618	179001	180970	214955	212176	304923	298118	332963	343087	254851	219338	303360	270870	40534	42899	55987	52533	65384	66419	81240	81314	55215	58846	70672	63334	278879	267682	287543	285436	71213	72873	69362	66428	638289	711182	625933	636196
-1.85	57148	58970	66132	60348	178610	184151	217821	211311	302184	300725	324970	346228	258445	225323	302055	272955	40468	42908	56044	52562	66606	67167	80634	81604	56286	58557	69784	64125	275484	269515	284526	294458	70559	73553	70364	66586	633164	707688	632020	637628
-1.76667	57377	58718	66772	60511	184101	182174	216561	209356	299010	302219	331798	344136	259188	228685	308669	272530	41168	43380	56581	53272	66556	67266	80537	81377	56160	58083	70624	64837	279594	270944	285266	286320	70445	74339	70898	66248	641264	719857	626107	637830
-1.68333	57415	59325	66099	60046	181237	186042	217607	209063	303051	303234	329277	344624	258612	225698	304179	273263	41095	43842	56659	53526	66414	67989	81434	81553	56504	58770	70881	64142	280794	270888	289190	286623	71410	74306	70848	66440	630563	720535	623766	641523
-1.6	57381	59450	65971	59934	179758	181888	217701	213491	302780	300454	333990	345043	258680	227729	305161	278784	41470	44361	57541	53458	67294	67959	82336	81883	56564	58990	70743	63893	281349	269823	288504	291962	72037	74438	71012	66512	636426	718253	625783	633003
-1.51667	58408	59726	66416	60365	180537	182502	214137	214865	297268	304892	335503	347090	259632	231785	303746	275009	41816	44328	56900	53421	66750	68089	81285	81936	56849	59617	70856	65124	281224	272452	279561	290951	71480	74646	71624	66598	637796	722038	629892	631981
-1.43333	58330	59962	67250	60779	185554	181774	220354	215181	303779	307477	336389	350933	256615	228826	308231	274472	42175	44716	57246	53902	68014	68227	82247	82214	57428	58933	70227	65004	281334	276636	284031	293554	71976	73908	71870	66689	636380	721935	629405	636629
-1.35	58259	59607	67134	60312	181013	185994	219440	218456	306103	309621	335270	343817	260569	232106	309168	282097	42497	44649	56856	54460	68121	69120	82789	82440	57454	59881	71411	64115	283880	270024	289737	290176	72382	74535	73209	67071	645308	720043	641256	629758
-1.26667	58866	59878	67763	60720	185815	186474	218788	212652	304878	303926	336897	347073	260311	229758	311827	281014	42645	44276	58673	54963	68320	69363	82341	83307	57040	59504	71399	64809	279242	273736	288097	290223	72953	74898	72090	67858	635768	721533	634171	635769
-1.18333	58525	60076	66916	61430	181418	184592	218049	216116	304135	305903	338749	346848	264076	230696	314437	283178	42964	45005	58941	54912	68177	69258	83733	83903	57316	59904	70995	65373	283122	272422	288193	289609	72404	74544	72298	67609	642486	720229	634462	640535
-1.1	59063	60143	67694	60993	183566	184330	217924	215556	301643	308901	333822	347451	259827	232321	310199	282469	43544	45458	58010	55719	68418	69302	82776	82915	57685	59659	71733	65141	286012	273313	290124	287729	72817	75536	72914	67563	641506	724633	643081	638598
-1.01667	58628	60909	68004	61561	187334	187128	218904	216079	311719	306346	338929	346536	262495	230624	313580	281119	43424	45979	59106	56064	68364	69891	83175	83252	58346	60065	71709	64389	283991	275810	292011	289232	72612	75333	73299	67526	643990	720539	635952	638558
-0.93333	59213	61211	67921	61869	188147	188539	218938	216188	310453	309326	336472	354784	267145	234552	310369	280264	44381	46042	59020	56154	68880	69517	83810	84348	57908	59575	71923	64767	285030	276436	289386	293642	73174	76345	73065	67494	645016	720508	632154	639065
-0.85	59581	61203	68015	61771	184234	187542	222346	214988	310762	306448	342352	348691	266061	235600	318576	281330	43933	46223	59528	56086	69130	70606	83695	84208	58476	59329	72314	64752	288342	276730	289360	289061	73761	76015	74056	67488	642866	717763	640886	641624
-0.76667	60101	61478	67683	61859	185084	191158	222357	221277	309240	309418	336026	346116	264501	234766	311533	284792	44601	46483	59204	56212	68957	71103	83333	84050	58815	60299	72855	63980	283488	281390	287807	293973	73036	75711	73564	66889	644063	716018	632395	642456
-0.68333	60151	61481	68318	62030	185118	187185	225172	217643	304557	311627	341713	351095	265772	239416	316286	282384	44266	46890	60076	57253	70040	70661	83846	84519	58067	60489	72105	64234	285833	280630	287226	291471	73329	76829	74182	67839	644463	719905	630652	641941
-0.6	59925	62182	67754	62140	188917	187823	223384	213089	307301	308237	343445	351711	264296	239185	314115	286483	44587	47309	59641	56686	70369	71152	84349	85462	58648	60853	71771	64735	284263	278261	289193	295340	74314	76414	74250	68002	639473	712803	641579	646135
-0.51667	60101	61979	68889	62693	186006	188293	223844	214841	310528	311167	342691	359017	268317	238223	317229	281871	44774	47028	60437	57426	70177	71100	84009	85498	58480	60455	71827	64823	284883	278729	287574	295856	74101	77074	74724	68070	645539	718947	640377	632635
-0.43333	60128	61605	69219	62561	185351	188487	224992	220996	311705	313220	345328	352889	267083	239198	313476	286710	44969	47676	60138	57411	70995	71866	84305	84936	58647	60056	71549	64613	288202	276681	293200	299184	73755	76010	74292	68659	645103	717308	641188	634682
-0.35	60594	61827	68644	62817	187447	188772	224127	220256	314996	310482	340599	354487	274581	240964	319025	285205	45281	47447	60583	57272	70925	72145	84580	85140	58679	60643	72933	64360	286379	280459	286787	287822	74133	77212	75215	68644	645695	718984	645968	640315
-0.26667	60982	62318	69060	63273	189208	191451	224867	220329	313611	310252	342605	354009	266496	238192	316079	287581	45793	47980	61071	58117	70492	71865	84829	85791	58416	60350	72299	65576	279548	279514	290763	295724	73589	77470	74555	68459	644655	717226	647992	645861
-0.18333	60982	62159	69401	63109	189121	189929	223109	219724	311431	315354	342960	349484	273171	239629	313207	286516	45555	47658	61452	58010	71985	73003	85079	85567	58665	60641	72978	65151	285841	281602	294093	295407	73864	77225	75520	68894	642753	716930	640895	646243
-0.1	60680	61837	69019	62709	186168	192700	227508	220339	314804	311885	347429	350277	266561	240188	318793	284595	46163	48569	60681	58784	71495	72798	85018	85601	58818	61026	72294	64789	283325	279243	291239	294091	74000	76957	75167	69525	641699	717132	640960	648347
0
0.13333	55354	56690	62690	58455	172601	175324	203391	198573	289355	289838	316361	322211	232095	212411	279171	254512	41789	44002	55330	52641	64612	65223	79078	76216	54796	54859	67832	59266	286072	256660	269234	280036	65133	64751	69509	66046	584828	681294	599524	603946
0.21667	55602	56913	62973	57845	172637	173972	205797	197080	290620	288064	314181	317950	231662	215296	280606	250614	41824	43556	54970	52419	64053	65789	78828	75213	54428	54501	67413	59858	286424	260779	267010	283377	66911	68853	69890	65474	591855	697893	595157	610223
0.3	56040	56508	62923	58351	171367	174659	205510	199219	293677	287302	320406	325805	236915	214444	283775	251184	41865	44055	56005	52498	64042	66358	78930	75559	54477	54568	67252	59326	281249	258561	266027	283294	66670	72134	70069	66276	584040	706474	607013	614481
0.38333	57293	56916	63066	58148	171159	170898	202828	197862	291768	291127	318512	322020	235515	212400	276333	254539	42591	43082	56062	52614	64237	66704	78571	77410	54818	55399	67986	59716	280442	259852	271539	282691	66602	74548	69516	65794	586033	716807	621004	611219
0.46667	59467	57201	63443	57747	172708	174823	203142	199174	293140	286863	313987	328853	237935	211045	278094	255321	43236	44101	56151	52854	65083	66957	78410	77119	55000	55187	67578	59532	285019	268004	270913	284051	69691	73946	70161	65961	598136	721742	616868	617475
0.55	62211	57127	64120	58904	179615	174531	204785	197781	299326	289529	321486	321690	238606	209732	284607	257522	42685	44303	56548	53409	64941	67212	79384	77922	55172	54671	67671	60030	283973	262256	275580	276826	70903	74439	70593	66247	600754	719635	616838	616041
0.63333	67062	57260	64102	59021	183008	173050	207770	199660	305697	291935	316856	326048	247139	212032	283400	252906	42976	44605	56693	53952	65039	67541	79366	77645	54947	55400	67957	59881	295584	259524	271967	283841	72535	75018	71350	66745	615922	714207	619732	621851
0.71667	70995	57291	63157	58319	188168	175196	206166	198196	310129	291787	322072	324004	251854	212291	285232	252761	43465	45030	57652	53558	65279	67183	79183	77563	55141	55694	68198	59791	298789	259537	273967	293104	74995	75716	71802	66454	625915	718144	621115	622919
0.8	75075	57794	63977	59044	190095	172562	203029	199894	317890	290293	317699	326538	263667	213536	283552	254741	43833	44660	57657	53778	65666	67857	79108	78144	55094	56778	67587	60362	309386	264940	270034	293332	78419	75728	70924	67024	644251	725673	619589	612555
0.88333	79994	59219	64101	59302	197673	173345	207278	199492	332596	291327	323816	327623	275998	212766	283085	250912	44774	45608	57520	54654	66721	69060	79707	77946	56037	55995	68726	60519	326907	269658	275077	289640	84296	76720	72171	67522	665235	712881	620337	613992
0.96667	84583	59811	64559	59813	206332	179326	205154	200017	343437	295858	324410	322858	294051	216284	280971	254004	45353	45066	57813	55075	67106	68534	79841	78342	56499	56916	69479	60941	336261	269325	275186	289070	91699	76841	72272	66665	689350	718141	612492	608128
1.05	88988	61009	64623	59362	215242	178323	207073	200004	358719	296542	321321	331858	305286	216690	285300	254774	45492	45701	57664	55156	67910	68573	80268	78307	57408	56342	69874	61115	356811	267103	275128	289058	98832	76288	73342	66282	705012	720952	615646	614867
1.13333	92723	62490	65675	59549	224815	178662	204875	201327	373722	296618	325408	331554	320637	214047	280414	254834	46131	46181	57951	55655	68069	69351	80236	78310	56742	57370	69657	60471	368234	266930	277354	294420	105179	78136	73774	67239	730593	702338	614726	608345
1.21667	95197	63160	65573	60441	231447	177390	208479	197856	382585	296719	329017	330419	335361	220487	288894	264171	47320	46603	57635	55109	68862	69188	80371	78663	57002	57106	70071	61249	389527	266668	281385	294896	110264	77334	74051	68136	754268	706363	618897	603505
1.3	98657	65105	65874	60414	242390	182696	205462	202356	403955	302906	329909	328298	352393	217750	285440	257317	48219	46702	58318	55255	70299	69979	80927	78617	56931	56909	69229	60571	413353	271102	281114	300601	119237	77541	73834	68386	772655	707891	615971	613248
1.38333	100899	67611	66469	60446	248627	179221	211158	200239	417102	299727	327833	326279	374736	224270	288271	259048	48342	46856	58264	55973	70487	70351	80954	78875	58173	56565	70517	61415	435646	273684	278750	294493	126844	79588	74246	67638	808408	712138	614082	612100
1.46667	102770	69390	67142	60708	259630	182710	204690	195010	427663	301566	323369	325738	381720	226948	287729	259608	48973	47626	58589	56500	70734	70049	81352	78633	58120	57146	69798	61010	448333	274184	282856	299153	136881	80365	74463	69005	834512	720215	623545	613827
1.55	105822	71157	67607	60212	270390	185592	212205	204631	445720	304376	328812	329937	397199	231216	284750	260144	49784	47145	59093	56046	71433	70347	81261	78289	58517	57003	69972	61075	459576	278149	277825	307084	144542	81147	75405	68799	848867	722540	625282	614527
1.63333	105939	73960	67754	61398	275142	186251	210402	203847	454067	309295	329944	330471	405990	234617	295033	256012	50747	47440	59576	56295	71973	71547	81349	79248	59986	57317	69246	61291	472571	283218	283798	303354	151711	82730	76004	69768	874471	718286	631644	611404
1.71667	104864	75572	68801	61417	283653	189224	210308	201290	466569	314674	327012	327928	426120	238631	292109	261643	51739	47950	59797	56637	72931	71172	81333	79145	60307	57335	69736	61003	486209	285114	282174	301725	155847	85684	76417	69024	892598	738476	633017	619032
1.8	108471	78298	70035	60455	290238	189336	211330	204296	479151	319663	328285	332549	436839	245296	291274	260531	52610	48133	59768	56207	73987	71364	82467	79547	60464	57770	70876	61286	499747	290174	284709	299779	161309	86960	77046	69659	913672	743662	622853	612736
1.88333	111825	80473	70794	61574	296374	195468	209864	203002	490081	321076	330913	329654	448940	251943	296200	262381	53726	48865	59894	56642	75101	71161	82502	80034	61192	58004	70254	62000	513567	294750	287334	301256	170411	89393	77785	70133	929876	745037	629270	616452
1.96667	110433	82964	71389	61938	306508	199183	212379	205029	498900	324601	336428	327855	460521	260219	293467	263831	54080	48755	59945	56876	75677	72248	83165	80472	61183	58097	70020	61724	516587	302901	290847	303223	172911	91454	78589	71221	944081	750545	630127	619414
2.05	112356	84643	72631	62130	310490	202999	212832	204639	501106	339973	332315	334819	469759	268889	295740	265275	54980	49095	60929	56891	77203	72772	82510	80776	62541	58335	70868	61977	539004	309185	289395	302480	178759	94070	78945	70255	955591	761014	639377	621795
2.13333	114898	86267	73203	62486	312631	204402	213133	202053	519300	343379	339108	337017	471548	278593	301160	266174	55497	50386	60426	57592	77611	72679	83453	80844	62209	58520	69780	61955	542308	309558	288352	306652	184267	97608	79194	71273	955491	772174	638086	624526
2.21667	115803	89459	74569	62959	319817	210715	217753	204374	526889	348890	341325	334784	484228	278409	299777	263675	57259	51066	60976	58129	77750	73260	83293	80457	62985	59442	70404	61443	559359	321185	292735	313345	193319	101409	79915	71836	987415	775005	643746	624556
2.3	115677	90916	75096	63295	320482	216587	217459	203925	533982	360881	337252	329952	496896	287766	306782	262051	57023	51364	61589	58394	78965	73414	83757	80062	62961	59604	70592	61855	556891	329522	296240	313804	195923	104018	81802	72156	990549	771512	637481	622394
2.38333	118386	92741	76516	63515	325795	217574	218026	206065	545300	367605	338272	332921	501973	297177	306118	264320	58572	52183	61476	58243	79674	74247	84184	80796	63465	59504	70277	61524	572552	340149	293927	313255	198737	105522	82860	73047	1000000	794166	651789	625542
2.46667	118322	94571	77445	63877	339170	225697	220332	202720	549663	373867	338655	333365	514805	307563	306584	264300	58851	52296	62181	58340	79827	74878	84150	80940	64384	59899	70675	62073	570181	343300	297564	314413	202214	109723	83527	73760	1000000	803002	646833	631632
2.55	115704	96430	79150	64870	341581	228056	224898	203451	555246	383642	347215	334031	522298	315099	310829	266204	59808	52797	62133	59354	80655	75293	84264	81091	64555	59779	71618	61843	570631	358476	303895	313553	210009	118541	84651	73355	1000000	812649	648352	624538
2.63333	119007	97918	78805	64777	337497	237618	222271	207892	564552	386370	350937	333651	522330	325052	313365	271447	61273	53630	61671	58508	81290	75978	85191	81512	64682	59882	71327	62314	588671	364679	302074	316010	210118	117912	85958	73842	1000000	826947	660702	631778
2.71667	120043	100633	80989	65190	344824	239388	226121	208743	571964	392933	351729	335947	529045	332797	311638	267010	60887	53788	62721	59311	81826	76315	85505	81326	65260	60545	71178	62359	577132	382074	307988	306618	208674	124292	86909	74225	1000000	841809	663070	634482
2.8	120464	100758	82167	66032	348819	243629	229029	206914	568292	403703	355309	334213	536989	340355	323605	266826	62442	54576	62733	58680	81993	77660	84823	81823	65643	60626	71074	62854	589370	387249	312077	309634	213652	126914	89405	74015	1100000	856292	675585	636902
2.88333	120503	102768	82979	66728	349701	253141	234548	206293	575860	412340	359953	337493	540422	352748	323100	268842	62396	55310	62834	59438	83195	77903	85698	81549	66197	60910	71934	62464	586331	396815	313072	312836	219764	130956	89837	74189	1100000	865814	674447	632991
2.96667	119994	102806	84364	66964	347243	255866	229685	208881	585233	419576	368298	335962	539583	362492	333748	268663	62784	55157	63668	59366	83921	78376	86009	81036	65670	61511	72058	63100	596224	405526	316206	316380	217357	136697	91505	74991	1100000	878738	685846	629342
3.05	121807	104648	85007	67378	357176	260642	237866	207885	581133	426677	365272	338494	549915	371252	330625	274973	64123	56194	63565	59278	84463	79261	85735	82567	67212	62012	71737	62316	598845	410688	325446	313032	220600	139185	93055	75659	1100000	884227	685226	627713
3.13333	122066	105505	86507	68946	361785	268153	238458	207269	585315	438551	370913	338421	550442	380575	341078	269347	64410	56780	63959	60292	85112	79334	86426	82129	66684	62028	72741	62557	605893	420271	324338	315985	223359	144935	96387	75587	1100000	900672	699650	619416
3.21667	124215	106304	87375	69008	360843	267930	244875	211173	591512	442182	377281	339858	560086	386829	343521	272838	65009	57840	64427	60159	85896	79429	86200	81412	67275	63177	73043	63137	604529	432665	326445	320347	223641	150028	98025	75777	1100000	917452	693643	627620
3.3	121104	108026	88716	69781	360396	272074	244770	209216	594935	447028	378154	336797	559764	392348	348171	276939	65469	58125	65134	60058	86164	81209	86460	82249	68199	62572	73036	62772	603322	439735	334121	318780	229050	150277	100506	76805	1100000	923078	704101	622603
3.38333	124146	106772	90295	69820	363286	279403	246315	211277	600095	459340	382026	342350	561492	409440	354977	274194	66401	58569	65304	60628	87028	80745	87181	83961	67682	63362	72493	63214	610402	445251	334315	318630	226682	154741	102412	76355	1100000	930551	703661	630849
3.46667	123992	108858	90989	70565	362031	286275	252896	209222	598209	459298	392810	339020	572759	416788	363061	280461	66821	59195	65301	60375	86830	80700	86885	82452	68441	63963	72679	63090	607385	447976	339546	319688	227886	159050	105228	75970	1100000	951380	715483	631683
3.55	124363	108675	92734	71354	367562	286123	254526	208253	601783	468065	395197	345211	571960	421165	367248	275507	67221	59379	65245	60759	87932	82735	88337	82720	68971	63729	73434	63237	607622	463513	347029	318269	229766	164357	106488	76868	1100000	949636	724014	628949
3.63333	122239	113442	94116	71679	370255	292129	259281	209491	603190	475889	404298	343621	574083	427213	371809	276779	68207	60131	66201	60798	88047	82049	87664	83823	69411	63257	72719	63188	607850	470275	354148	314524	232898	168981	108300	77877	1100000	971946	724199	636472
3.71667	123799	113314	93893	73055	373361	292682	260589	213523	610490	490620	407401	341709	575187	430131	375745	281875	68521	60802	65958	61256	89364	83668	88984	83281	68811	64275	73650	63332	604806	466788	357743	311099	234737	172388	109359	78477	1100000	975939	745847	632927
3.8	125761	111807	94727	74047	373287	296120	262027	212091	611926	488298	410428	343166	580244	442511	388439	285575	69120	60654	66694	61197	88995	83655	88710	83112	69448	64518	73436	62997	603613	476183	363491	318559	233299	175833	114920	78563	1100000	989485	753006	638357
3.88333	122389	111967	96703	75177	370833	302817	265717	212493	619710	494245	417172	349625	583896	449118	388267	281075	69131	62598	67564	61592	89697	84732	87891	83093	69441	65377	74152	62966	609474	486685	365502	315143	233426	180497	115257	78763	1100000	1000000	751913	628169
3.96667	122260	114843	97519	74813	377355	299524	273140	214390	611145	496894	424404	344617	582236	451414	391952	283274	69704	62453	68108	61487	90330	85216	89605	83665	68572	66042	73737	63502	611810	483361	371430	319357	235347	182480	116995	79901	1100000	1000000	762372	631778
4.05	122893	113688	98323	76041	371382	307669	273552	217493	624178	502863	432138	349762	588010	458018	401963	288094	71042	63032	68187	62282	90919	85363	89655	83375	68866	66244	73902	62966	600248	493254	380433	323043	235687	182798	121732	80801	1100000	1000000	766875	631283
4.13333	125641	115694	100119	76630	385542	306498	275355	216902	622687	508331	436165	351623	586699	466871	404784	285198	71573	63200	68579	62422	91250	86077	90013	83476	69339	66463	74635	63637	611359	495062	386598	321431	237808	189711	125174	80849	1100000	1000000	778175	630217
4.21667	124161	115998	99775	78353	386549	317331	281189	215121	619176	514023	438290	351635	589939	472812	405094	290656	71991	63344	68996	62370	90859	86126	89953	83835	69829	66104	74465	63149	610741	503529	390654	319882	237774	188365	125656	80943	1100000	1000000	788379	639757
4.3	124741	115729	102495	77921	378173	314380	281971	218334	616211	518821	441428	360203	590565	474225	413913	292343	72280	64939	70288	62825	91940	86404	90062	84479	69908	67055	74836	64106	612594	501546	394238	322247	236323	195184	127766	81388	1100000	1000000	795809	636741
4.38333	127530	116714	102553	78849	378811	319729	288307	217170	619577	520586	447067	356193	591599	474663	420932	292503	73044	64684	69358	62197	92587	88069	90845	85187	69847	67167	75184	63821	613694	506759	400208	324976	239436	194249	130895	82725	1100000	1000000	804392	645203
4.46667	124616	117622	103773	79671	380919	319977	292493	223239	622676	528950	449486	355393	591930	483462	427593	298256	73421	65665	69925	63365	93948	88394	91361	84306	71095	67548	74879	63512	602881	517679	404714	324262	238484	195416	136034	82946	1100000	1000000	806605	641967
4.55	122682	115934	104355	81428	383610	318183	291314	217062	623748	528133	454492	357491	594247	489554	431421	294965	74050	66555	70753	62698	94158	87849	91763	84610	70571	67196	76249	63469	606493	516387	409563	323885	236867	197269	135835	84116	1100000	1000000	820837	637554
4.63333	122095	116955	104159	81687	382847	326490	292564	218714	626470	533629	454588	361881	593915	491791	437536	300993	74488	66495	71073	63290	93578	87721	91705	84602	71157	67975	75869	63726	605928	516458	413918	324762	242134	207176	139921	84418	1100000	1000000	827083	643927
4.71667	122996	114087	105817	82382	383837	331403	298988	222937	628453	534958	459977	365934	593990	494910	443290	298098	74917	66432	70519	62990	94021	89122	91647	85528	71809	68137	75531	63738	600886	520225	417469	330671	240490	202767	141432	85449	1100000	1100000	845488	640584
4.8	123617	117585	105542	82632	380279	336696	304960	221734	625572	541952	469435	368639	589568	501098	447398	306513	75251	67402	70840	63867	94633	88809	92271	84656	72249	68222	75655	64109	607718	524427	420769	332837	238477	203654	146488	86121	1100000	1100000	848280	640156
4.88333	124814	114127	106142	83085	388045	332213	301785	224693	625846	543005	470251	367656	596849	504940	444197	307673	75538	68212	72486	64086	94741	89595	92935	84348	71792	68220	76124	64411	602236	526850	429099	334933	239670	204966	149060	86267	1100000	1100000	851603	643523
4.96667	124038	119367	107548	83828	393005	334935	304435	225364	634173	543258	476844	362139	603324	505426	457558	311435	76157	68496	72419	64327	95086	90840	93720	86067	71799	68669	76540	63547	598761	525988	426419	332998	237744	206733	147920	88332	1100000	1100000	855378	655988
5.05	125038	119982	106798	84577	393340	336897	311712	226763	626092	536983	481809	370826	608235	508015	463846	311622	76109	68477	72215	64351	94671	90706	94595	85618	72332	68479	77026	64273	601047	536506	431875	334135	236519	208289	150519	89145	1100000	1100000	859775	645401
5.13333	124628	118491	107534	86189	381764	339963	309246	232402	628166	550140	484089	380348	604006	505471	468699	311319	76609	69354	73584	64305	94919	91940	94691	85764	72829	69257	76289	63951	598665	529706	433464	336937	238873	211647	154646	89329	1100000	1100000	865023	663295
5.21667	125916	118664	105470	86519	384782	336181	313929	231411	627662	554542	482620	375126	604035	519025	467928	316544	76862	69708	72949	65251	95633	91892	95047	85754	72926	69698	77853	64130	595194	532198	440086	336737	240220	208195	155807	89958	1100000	1100000	867875	656759
5.3	126545	119498	109653	86476	388654	338884	310658	235005	625612	547612	493062	379310	601963	521172	467152	316677	78016	70634	73570	65332	96680	93067	94573	86341	73989	69034	76711	63801	597839	530445	442904	344487	238110	214405	161494	91327	1100000	1100000	873574	655034
5.38333	125058	118196	111151	87771	385073	341536	320095	235054	628312	553378	496520	380198	608904	525509	470994	317266	77525	71463	73590	65446	97324	93069	95512	86391	73761	70046	76775	64307	592564	532647	451679	341998	234596	213754	161703	91629	1100000	1100000	873943	660078
5.46667	123249	120401	110238	89241	383930	349070	324692	236967	634006	561675	500839	381748	603716	524304	477006	327093	78971	71655	74117	65859	97502	93174	95539	85445	73886	69627	77230	64730	596328	540227	448840	347381	236790	214151	165028	92753	1100000	1100000	882915	659366
5.55	123255	121624	112163	89254	387345	346688	323614	233566	626371	555682	503679	384727	608449	530080	479019	320698	79105	71992	74511	65451	97546	93721	96317	86306	74052	69949	77684	63991	594148	540719	447531	343143	239836	217938	166882	94707	1100000	1100000	887203	665409
5.63333	123912	119701	114262	90359	389951	350756	326309	236276	632624	556210	510101	383728	604288	528711	486410	331412	78804	72525	75331	66310	97586	94047	95960	86200	74086	70283	78134	64358	595728	535137	461211	347885	237622	219902	161970	96137	1100000	1100000	887968	659717
5.71667	123738	119024	108717	90636	385519	343352	323635	239386	630383	563018	508286	385072	605175	531310	489247	329803	78664	73012	75217	66615	98008	94824	96265	86647	74515	70887	78178	64481	594898	539957	462041	349756	235792	220352	166122	96772	1100000	1100000	903142	668127
5.8	125731	120040	111458	91352	386337	348120	328011	237784	632269	566936	508965	390197	601225	527292	489374	332812	80014	73578	76063	67286	99033	95308	95795	86921	75107	71050	78397	64882	586888	537525	469549	351866	236230	219726	172001	98043	1100000	1100000	905878	674558
5.88333	124768	123262	111587	92053	389757	351370	331811	239965	631352	565853	513904	389049	603260	538459	501439	334640	79946	73287	76287	66325	98442	94649	97813	87185	74543	70607	78663	64411	596759	541161	466664	356840	238807	218015	170568	98309	1100000	1100000	901786	676771
5.96667	124443	121301	115168	93196	387783	350349	334221	246302	638691	565821	518761	394036	606043	543005	497072	341376	80685	74232	76891	66958	98178	96164	97500	87400	74749	71011	78918	63897	589838	545746	466106	355082	238547	218768	171813	99317	1100000	1100000	911486	675699
6.05	123746	120272	115057	92517	381786	351483	332392	244638	632999	572844	519811	396003	607020	542933	497669	340646	80889	74201	77234	67331	100368	95463	97964	87390	74836	71632	79638	64728	592406	540924	466515	357357	236700	221930	175377	100144	1100000	1100000	911171	680085
6.13333	122087	119285	114687	93626	386328	355401	331433	250660	627458	573716	518573	406611	610227	546567	505116	340384	81055	74140	77006	66835	99226	95824	98215	87744	74573	70879	79228	64953	595549	545089	469555	362221	240554	225867	176290	102110	1100000	1100000	912913	688848
6.21667	121300	120255	112052	93745	387467	354867	335752	248651	635353	579049	524503	399877	608127	545577	504337	347801	81350	75437	77584	67755	98472	96521	97886	87825	75064	71909	79611	64875	589093	546785	474769	362625	238101	229202	177452	102834	1100000	1100000	918589	690685
6.3	124162	123003	112820	94650	391999	354857	338325	251285	629139	564373	533182	405350	607577	551014	510872	348361	81908	75425	78507	67636	100671	96510	98755	88180	74953	71751	79742	65154	588653	541416	477251	364566	240196	224584	180820	105464	1100000	1100000	915543	688511
6.38333	122102	121010	113657	95832	388614	358912	337671	250833	636686	574311	532427	404931	611485	544724	511245	354102	81852	76020	78682	68398	99420	97119	98688	87751	74834	71941	80292	64676	587782	549984	478228	367600	236552	229754	182026	105841	1100000	1100000	918230	693761
6.46667	125555	119186	110800	96191	382419	358467	338118	256921	626630	573029	534131	406491	603682	554942	515203	349143	81612	76540	78537	68263	100094	97307	98902	88596	75631	72473	80561	64719	589250	543887	474737	365126	238512	228612	181637	105692	1100000	1100000	918241	695599
6.55	121804	122984	114253	96162	385348	351529	337494	256464	628746	570033	530282	411525	602982	552350	521220	362080	83016	75739	79092	68517	100649	97483	98676	89258	75649	72875	81156	65353	587472	541605	482052	374113	238600	226083	177782	108060	1100000	1100000	929852	706294
6.63333	122552	122659	114344	97519	384671	361173	346434	252515	633129	582410	539290	411863	609717	549793	519373	366247	83029	77269	79015	69059	101733	97936	99176	89908	76537	72296	80667	65809	586663	542095	484454	372556	235993	226938	182513	106171	1100000	1100000	923762	702560
6.71667	124307	120148	115958	96852	384351	359390	342374	258237	626008	579474	536469	415682	604949	551737	520379	371109	82440	77632	79408	68485	101376	97938	100314	88914	76031	72751	80428	65278	582754	544145	481955	378636	235564	231362	184082	109168	1100000	1100000	922153	704726
6.8	127045	120266	117328	97670	390600	362031	346197	261998	627664	584514	540866	417902	607929	560295	525325	365806	83587	77544	79737	69396	101532	98766	99716	89187	76410	72938	81207	65098	585946	541017	488358	376160	236963	230595	186795	109105	1100000	1100000	926364	712757
6.88333	123482	120313	115340	97697	390857	359408	345936	259246	626997	581201	544992	416706	609062	546318	526861	373678	84114	77995	81351	69292	100793	99316	100601	89766	76288	73760	80890	65657	578149	542846	484523	378762	232675	230168	186656	112292	1100000	1100000	930882	715572
6.96667	124784	120772	114781	98814	383600	356691	349549	261090	623182	580110	540832	423275	606164	557532	527349	375861	83971	78753	81053	69470	101284	99316	101245	89620	76139	72534	80840	65242	577142	541219	495019	381542	233552	228140	185412	113541	1100000	1100000	935185	724476
7.05	124793	120771	116951	98367	384498	358852	348255	268623	623225	575514	547688	426467	605108	558884	526552	375951	84174	78651	81030	69734	101715	99204	100902	89889	75981	73554	80384	66084	580102	543587	494114	388615	239816	228116	186578	114215	1100000	1100000	929311	719746
7.13333	125184	123479	116551	98132	381097	365167	349440	264130	624689	587006	546069	425457	600767	557569	530939	381970	84564	78509	81571	70207	102088	99584	100841	89748	76794	73011	81448	64929	580397	541965	496622	391008	233041	229972	188647	117610	1100000	1100000	936755	723343
7.21667	125248	120329	119370	99668	389079	363814	352570	264735	628035	581777	545267	432766	606419	558904	535276	380148	84855	79615	82030	70640	102411	99357	101034	88211	76380	73749	81252	66092	578175	541901	487260	388149	231842	230297	188615	117808	1100000	1100000	946519	730378
7.3	125481	119966	114636	100318	384261	362894	351063	274523	624649	587244	547745	434306	597546	559920	533506	378405	85231	79928	81265	70178	102360	100225	101342	90122	76915	73573	81236	65750	573432	540532	487598	394206	234085	231648	191859	118616	1100000	1100000	945587	729981
7.38333	124303	122595	114705	100439	390284	361570	347619	268841	620627	584931	552966	432597	607283	561915	535395	385318	84992	79278	82257	70791	102521	101023	101913	89415	76396	73895	81650	65766	580404	540202	494452	397508	236941	232379	189519	118997	1100000	1100000	941509	735009
7.46667	122723	121550	114585	100737	379338	369007	352615	278848	620121	584194	548575	429393	605761	563494	541498	384292	86025	80353	82198	71423	102669	101302	102573	89280	76631	73268	81556	65190	572038	539846	486376	395531	234085	228594	188776	119604	1100000	1100000	941194	732979
7.55	126025	121675	118481	101651	381017	358410	353112	272915	619993	576096	556793	439172	598740	554842	536480	395439	84805	79642	82687	70881	103443	102039	103210	90598	77391	73467	81280	65752	578284	543323	492693	405753	230341	228412	190098	122700	1000000	1100000	942474	733387
7.63333	122166	124377	117701	101850	384167	363152	351311	272781	626650	585109	548128	438427	600300	567632	537035	395363	86362	80706	83786	70888	103505	101979	102869	89856	76584	73358	82294	66299	578442	538974	492234	406542	232396	230279	190664	124678	1000000	1100000	940741	739371
7.71667	120955	120828	118717	102234	378763	361026	356282	274226	626635	582696	552276	444447	596463	566982	535797	394132	86534	81514	83566	72004	103298	100597	102441	90901	76640	74561	82253	65975	577241	537579	496900	407510	235881	231861	195207	123728	1100000	1100000	944711	740413
7.8	122099	122335	116112	102454	384160	366930	357688	279285	624841	585686	556986	445650	608099	566471	544154	395438	86341	81608	84166	73194	103082	101590	103380	90625	76980	74346	82446	66452	574614	541409	500679	409205	231632	228938	194584	127089	1000000	1100000	947208	743708
7.88333	122745	122141	117043	102900	386073	362069	360697	284055	621943	585262	554092	439716	597880	565689	551108	406662	86966	81544	83296	72261	103379	102798	102979	91294	76982	74441	82446	67390	569450	542976	502558	408505	233168	231591	193289	128520	1000000	1100000	943128	742375
7.96667	121395	122479	118609	102349	385778	365617	354007	283001	616903	587848	551814	447065	599378	572225	545213	407252	86494	83034	83868	72638	103184	102108	103276	91008	77387	74112	82554	66141	571908	542071	502558	412760	230130	229564	195065	124938	1000000	1100000	943447	751814
8.05	122045	122633	119404	102833	390071	364469	353204	281252	625853	587367	566137	447587	602528	555617	544380	407127	86216	82754	84308	73282	103894	102606	103021	90825	77085	75125	82330	66723	572557	540865	497289	414961	230406	231406	198098	128324	1000000	1100000	946648	755343
8.13333	123631	121905	117580	103429	387544	365708	354709	285461	618270	591220	556771	447978	594354	565851	545547	409435	87242	82384	84877	73104	104031	103285	102895	90742	76443	74583	82352	66174	570411	536566	504485	416001	226268	234197	196437	131747	1000000	1100000	943841	763567
8.21667	121665	120083	118003	103125	381355	367373	357789	284735	615625	590759	566364	453508	598766	571627	546077	414555	87857	83347	84773	73376	104283	103749	103149	91062	76785	75402	82370	67200	565650	532758	499749	417161	226588	231753	200708	132429	1000000	1100000	940177	759965
8.3	119792	119560	121997	103963	383207	368374	363197	286408	622067	585754	562327	451794	600293	567009	552208	415935	88161	83634	84621	72856	105001	104018	103606	91378	78027	74708	82787	67132	569142	538048	502769	415730	229284	229342	197203	131853	1000000	1100000	938747	762592
8.38333	125648	121540	116033	104132	381884	364092	360755	284963	613703	591048	564294	456264	601952	571119	548476	419213	88217	83524	85407	74395	104883	103890	104392	91237	77832	75064	82728	67062	560245	532812	498171	416123	226645	233531	196711	135393	1000000	1100000	950712	767127
8.46667	121837	120101	115722	105678	382787	366236	360795	286177	614701	584640	562012	460020	592598	570155	551590	419892	88001	83509	85897	73535	104510	103666	104663	91889	77131	75134	83132	66053	567301	524241	496110	420825	227325	233223	197030	136068	1000000	1100000	944401	769777
8.55	124123	122218	115950	105399	385768	365362	360273	288022	612267	585837	565619	459407	589519	569014	545874	416494	88496	84678	85380	74935	104781	105054	104001	92189	77315	75236	83883	67005	556212	533515	498345	421491	224009	231127	199223	135380	1000000	1100000	933519	765163
8.63333	122472	122336	121128	104981	377603	366194	361598	289448	615487	586996	570510	462043	589434	575075	553375	417202	88671	84496	86205	74350	104035	104098	105399	92044	76764	74502	83433	67093	557730	528893	505215	424651	222645	234084	199118	135955	1000000	1100000	944815	766866
8.71667	121039	117458	115695	105671	377795	367391	363880	289162	616704	585008	569209	460615	594214	570092	551009	414376	88885	85225	86583	74891	103672	105012	104753	92038	77522	75258	83337	67295	556364	530114	500297	421052	225978	231087	197813	138569	1000000	1100000	942344	774529
8.8	123754	125849	119100	106526	382387	365965	359744	294135	612550	590890	564835	468629	595804	574929	549968	428184	88286	84916	85831	74433	105484	104714	105134	92245	77404	75970	83426	66803	562263	523544	498232	424994	228077	235051	200832	139608	1000000	1100000	947604	771619
8.88333	122519	121583	116720	105351	377782	367856	358875	295672	609109	585118	569961	465375	589820	576261	552815	429064	90005	85161	86562	75020	105079	104619	105489	92237	78193	75385	83878	67297	557573	528231	506002	425930	226477	235965	198632	137505	1000000	1100000	945788	779990
8.96667	123933	121083	118891	106602	374639	368136	360935	291185	616393	581748	561814	469273	589483	570761	558561	428703	88790	85510	86828	74961	105769	105815	105300	92603	77504	76087	83239	67620	558028	524544	504310	420216	225340	234179	198783	139802	1000000	1100000	940431	782636
9.05	121733	120844	118476	105366	376678	366106	370801	299217	607059	585829	567404	468864	590577	570719	557269	426810	89271	85298	87374	75502	106241	105784	105007	93268	77948	76582	83651	67065	552971	522668	498147	428026	224935	233808	201851	140858	1000000	1100000	941111	784787
9.13333	121479	120280	119783	105823	380686	363596	363046	298677	608680	585427	568520	471300	589726	565754	552768	430611	89370	86241	86552	76724	105180	104907	105991	92923	78131	76327	83226	67473	554686	521240	501389	435855	221597	232148	193961	141925	1000000	1100000	945066	789828
9.21667	122094	123328	118913	106270	374323	370662	367718	298663	604365	584116	574613	471044	587921	571292	554409	435911	89916	86396	86951	75830	105277	106812	105747	93017	77792	76117	83210	67371	551539	526088	499723	436650	223933	232834	201324	144313	1000000	1100000	942862	789922
9.3	120987	122801	119956	105970	376310	363297	364111	296197	605737	583767	578541	474407	580207	570286	558823	435286	90126	86630	87647	76153	104897	106006	106801	93151	77921	77329	83868	67372	557751	516369	501128	431624	222939	230165	197429	144759	993436	1100000	938368	783102
9.38333	119313	121839	116557	106179	378743	363867	365654	300767	605712	584289	569298	469679	587331	571967	560920	432234	90309	86933	88012	77079	105217	105488	106259	94087	78202	76493	83799	67290	539933	518904	504090	432033	226754	234180	199688	145903	1000000	1100000	942736	793970
9.46667	121520	121259	119735	106295	375449	365832	365750	302191	610363	582622	569050	475202	583142	572797	560205	444562	90119	87149	87680	76744	104176	105565	104759	94022	78080	76332	83614	67590	547324	524139	499741	433780	222660	227420	201443	145586	999182	1100000	941834	795465
9.55	119731	121876	117148	105996	374558	364418	370754	305890	599153	584888	572541	479415	586366	573385	569653	440518	90610	87891	87967	76822	104244	106078	105524	93541	77775	76345	84777	67908	544387	516871	494634	432089	223786	229328	204021	146357	998491	1100000	939384	784639
9.63333	118943	118314	114974	105053	373540	364219	365953	304325	596232	581952	565178	480155	591055	569925	560258	437871	90171	87320	88368	77000	105080	106678	106440	93180	79037	77197	83820	68185	539067	512912	492963	436249	220685	230476	202954	147704	989099	1100000	937544	792114
9.71667	120178	124187	118274	105949	374308	365462	364846	301700	605730	581409	569014	481124	584328	573106	561294	445286	91018	86671	88664	77490	104834	107092	105062	93324	77457	76834	83977	67647	541603	518041	501511	438853	222050	234535	204149	146481	991642	1100000	934129	783704
9.8	120910	119812	117800	104856	372243	363143	367558	301910	601425	577443	569211	484266	580671	573943	556499	442507	90456	88026	88263	77531	105569	105373	105543	94279	78108	76831	84568	68581	541159	516228	508286	432979	218063	232664	202630	148178	984981	1000000	936906	796301
9.88333	121006	118287	114655	106889	377594	362299	368454	304793	597198	578284	574207	484485	584719	565909	560807	447228	90578	88031	88732	77825	105313	106028	106372	93472	77773	77090	83625	68074	542938	517299	503771	443834	222315	230648	199874	149726	981195	1100000	934387	803381
9.96667	120813	122026	115617	105334	368229	365005	365496	307961	595168	580475	571695	480309	580465	566347	561427	447874	91421	87162	89688	77525	106306	106814	105809	94362	78448	76724	84748	67780	537850	509324	504671	445372	223290	231405	201649	149752	984072	1100000	948983	797340
10.05	117859	120082	118115	106244	370888	361786	368728	305386	595484	582807	570269	486008	589292	564105	564535	451750	91498	88057	89522	77736	107351	106557	106080	95040	78605	76904	84035	68487	537598	510439	502518	444871	219081	231833	201321	151078	983930	1100000	930688	797713
10.1333	118840	119377	119036	106615	375600	360962	367185	306637	601290	583333	562914	486393	582662	570711	559335	448039	91423	88964	89501	78022	105766	109758	106956	94685	77982	76694	83981	68336	531103	511777	488243	445095	222380	232374	200746	148673	987546	1100000	947282	802224
10.2167	117253	120446	117011	106885	372376	363167	366690	310027	592758	576158	571369	487666	581043	568002	560923	451937	92141	88391	88602	78459	106709	108207	107403	94156	77677	76345	84469	68884	537947	517155	499797	441769	219451	229888	202745	152870	973974	1100000	932397	798213
10.3	114643	120099	119357	107300	369924	364199	365224	309295	591236	583758	573129	492771	572408	576511	562222	459314	91017	89083	89037	78378	105913	109852	105587	94720	78080	76394	84478	68393	535308	509784	498412	446108	219885	229148	201994	150895	966398	1000000	931213	799785
10.3833	117576	122629	117930	106933	370787	363854	365663	305600	590500	579016	572999	491636	577058	563693	558465	457348	91542	88729	89621	78129	104708	108076	108532	94551	77949	76796	84705	68918	531190	498824	491503	439916	217434	229780	200337	154036	965618	1000000	927115	799412
10.4667	119025	123153	115415	106016	372040	359066	368278	307870	590828	582455	570652	489454	580084	566767	562358	459926	92060	88410	90406	79863	105810	108927	104018	94510	77405	76831	84342	68412	528566	507345	502337	439083	218237	229205	206340	152565	967897	1000000	930495	798793
10.55	120996	120139	117577	107153	366043	357208	366082	311273	597239	576396	572927	486277	574051	564619	556710	456518	92163	90244	90067	78981	104067	108365	105696	95168	77614	77399	83582	68502	533811	508904	493125	442814	216146	227156	202470	155465	956697	1000000	930928	803383
10.6333	116826	120847	118532	106666	372638	365504	369018	315588	596432	579357	572373	490132	573786	571250	560532	459757	92212	90001	90034	79533	105321	106536	106865	95742	77724	76816	85461	68272	527273	509496	497748	448020	218205	229616	202248	151851	969058	1000000	930526	794910
10.7167	122518	118432	120201	106320	371026	363001	365834	310898	594577	573110	572918	486627	571298	566928	560450	455568	91898	89487	90214	79661	106483	105955	106861	94750	78163	77274	84154	68567	534263	507660	493014	446860	216623	228878	199988	154334	961773	1000000	922816	803396
10.8	119764	119218	117594	107696	367817	362785	362968	310289	593443	579406	572898	493213	574385	560329	561589	457050	92026	89982	90383	79740	105860	107031	108551	95621	78039	77496	85369	68291	522047	505063	499317	443770	216280	228508	200857	153049	950953	1000000	921935	804024
10.8833	118596	122259	118488	106614	374601	363511	368674	318358	591897	573180	567279	490492	570688	568931	562024	462962	93045	89953	90742	79876	106915	105145	108323	95097	78394	77279	84846	68652	527367	503860	494962	444733	215489	227537	204080	150965	951186	1000000	923525	799305
10.9667	119677	123353	118482	107372	367995	368081	368752	314628	586556	576642	576023	501001	571035	556120	555884	465335	92954	89065	90583	80569	105948	108568	107359	95614	77852	77533	84542	68982	527632	503937	496486	446247	215341	229578	203758	153128	951576	1000000	932005	798130
11.05	118749	122141	116646	106596	371175	359998	366648	308166	591050	577302	571404	496642	576558	561396	560504	462558	92752	89706	91032	80023	105801	108874	106414	96106	77660	77316	84980	68309	528829	502147	495447	445812	218973	231101	204388	154919	960759	1000000	922665	797243
11.1333	117367	122030	116393	107245	365419	360702	369674	315687	584474	576547	570941	492069	575483	566042	559194	463232	92763	89959	91528	79779	106670	109351	108125	94990	77991	77823	84536	68530	526305	501473	489191	447210	215714	232173	204457	156760	944559	1000000	934514	795061
11.2167	118655	119074	117554	103982	369778	362984	366588	311736	581923	573738	567980	497269	572706	564031	560015	465224	92882	90696	91766	80393	106692	106415	105542	96341	78345	77825	84910	69153	519999	493724	491765	445372	216027	224377	199503	156476	956079	1000000	928439	809431
11.3	116636	118721	118497	107684	365111	363656	373045	313494	591446	573023	573841	493994	568259	562293	560675	465738	92980	90365	91060	80249	106756	108905	107363	96498	78036	78365	84533	69438	517606	495112	486664	454242	214242	230334	202636	152716	950700	1000000	926782	798717
11.3833	114598	118099	116241	105620	363858	358205	370755	312046	582477	571509	571606	501856	570362	557958	557281	472503	92681	90762	91437	80458	107742	107427	107390	94865	78980	77620	85503	68967	518512	498862	489794	446613	215551	226618	202661	156673	947876	1000000	930246	812578
11.4667	119381	121880	118797	106542	365314	360830	362809	309235	584896	576294	567150	497256	562775	566198	552152	465939	92836	90589	92907	81813	107025	108733	110046	96642	78091	77597	85026	68804	518333	495836	491617	456292	213707	226569	207637	158587	933036	1000000	924000	802704
11.55	115779	118572	115763	108233	365072	363630	368486	315653	582282	581896	575624	499040	568205	565068	556954	468623	93466	91168	91156	81025	103795	110078	107959	95858	78103	78345	84927	68498	522154	496997	491956	448152	210670	223270	202245	157918	950674	1000000	923843	802848
11.6333	116369	114569	117908	108522	362093	363126	361180	312393	584860	574355	567141	500969	560777	561508	564064	467582	93408	90566	92197	81214	105176	109007	109235	95920	78622	77883	84303	69430	517892	491968	493577	454272	213506	227484	200451	159176	940347	1000000	922762	802262
11.7167	117206	118893	117477	107822	364747	360841	367563	312370	582833	576429	577025	500895	565950	559977	566064	469869	92976	91081	92339	81281	105907	110727	109408	96461	78295	78785	85025	68193	517650	494508	485696	445690	211219	227374	198524	159448	927425	1000000	916017	798831
11.8	118274	117608	116923	106876	365392	359189	365192	315096	581710	577608	570225	498889	569771	558799	563998	468569	93010	91727	92782	81929	103874	110697	107921	95944	77943	77871	84281	69180	515263	490774	499916	447452	212641	227027	202287	157667	940265	1000000	910894	801845
11.8833	117868	119317	116039	106792	363532	357401	364717	310981	574163	570799	572392	498325	564712	560025	562983	465241	93300	91503	92104	82631	107085	105706	110340	97455	77795	77984	84949	68588	513324	486466	487670	442166	210031	225166	200530	159648	930740	1000000	910100	801280
11.9667	116720	119241	115031	105689	365652	350780	368986	315336	573770	571115	568891	509980	561900	562677	559211	471349	93330	91590	92373	83016	106241	110404	110613	97789	78176	78664	84984	69037	509818	490421	489613	446190	214473	223314	204051	160343	932552	995877	906791	804610
12.05	116538	117544	116060	106953	357040	357047	369469	322095	574335	571406	567213	509964	561214	558034	560502	478160	93673	91949	92758	81899	105730	109900	108805	96914	78759	78682	85251	68773	512891	486430	489427	443400	208191	223339	203215	161116	932570	992067	902874	807971
12.1333	116496	119689	113981	106541	357968	361552	368720	322542	573644	565990	570331	503596	562445	561022	553464	475170	93698	92413	92297	82042	104639	110201	107761	96940	78582	78570	85477	69105	508617	494952	490463	446557	211389	223909	199373	162698	929409	997414	896029	813048
12.2167	116021	117832	114966	106492	357710	358541	369168	319168	573582	566594	564764	501042	563223	559161	563000	474510	93712	92263	93123	82280	106073	109113	108372	97587	77719	78069	85322	69013	505074	488147	488244	454817	210069	223752	202219	162957	929548	995110	900725	801752
12.3	115171	118416	113097	106555	363629	357154	370151	314737	577739	568986	566349	512971	563398	558744	555242	474541	93115	92097	92357	83135	105194	108261	106899	97546	78922	78234	86021	69904	506128	487397	488821	449725	208586	219205	203739	162616	922861	991867	905349	805267
12.3833	117097	119082	119184	106798	361687	353295	371957	315914	572193	562159	567927	505147	551075	561034	560420	474501	94463	91870	92909	83288	106459	110672	109690	96877	78153	78064	84903	69376	511074	486544	487111	453226	209636	227370	199963	158457	918445	989071	899966	811883
12.4667	115010	116827	118139	106344	359384	362743	367260	319283	569638	568443	565727	503875	555833	558927	562445	477088	93934	91567	92051	83043	106190	110191	109470	96904	78115	78123	85063	69496	505597	485981	484938	442265	210717	220360	199422	160057	918117	988719	902886	803800
12.55	118042	120484	115895	105562	355930	354193	368139	315237	570080	566477	567479	505617	555204	561385	557306	469555	93661	92085	93554	83112	106082	109532	112594	97772	77967	78086	85459	68739	502239	484007	485189	447378	208886	221626	201320	160127	925877	990171	900930	804102
12.6333	116706	120262	115301	107752	357254	353685	371487	319766	562163	560253	564213	504076	554240	556532	561755	477509	94454	92773	93596	82736	107497	111361	110047	98178	78303	78132	85433	69435	501852	477776	483745	448966	211300	223277	203272	160637	921812	992542	907900	800758
12.7167	118706	118536	116817	106002	356958	358908	370287	320125	563343	565926	562418	505980	552043	556064	554841	472755	94302	91934	93083	83700	108768	109675	111788	97995	78449	78137	85431	69389	505420	478625	489545	452792	207743	225031	199694	162786	918121	994739	899735	806538
12.8	113668	117820	116341	105330	356411	351477	365407	323827	566630	566056	563252	507249	551289	561249	561212	476189	94464	92590	93259	84251	105345	107214	109834	97666	78791	78120	85510	69632	505549	476041	480093	447329	206821	225858	200857	165846	915478	993634	889763	800028
12.8833	115621	116013	118363	105778	356636	355817	370677	323401	559617	563672	566590	506419	550236	552512	557285	485925	95045	92629	93646	84032	106605	110570	109183	97370	77974	78131	84491	70092	500474	481487	484639	450363	209284	224571	201733	163421	913133	991481	893447	808406
12.9667	114370	117898	115705	105880	358982	353077	367121	319963	567080	560926	559732	503368	550542	552234	555622	484154	94935	93480	92992	84099	106970	109286	105989	97761	77646	78095	84338	68454	500756	476450	483882	447924	206905	224654	200098	161180	914719	993511	889961	799422
13.05	116402	117331	113853	106252	358070	350497	365323	319958	557302	561029	565236	509099	550725	556267	558277	474121	94786	92704	93760	84819	106412	108780	109017	97932	78189	78572	85365	68816	496131	477262	479271	444385	203795	224506	199488	163244	907685	986640	893083	805178
13.1333	118596	113655	117700	107670	349207	355616	366943	319297	569288	558090	560982	508359	550877	550639	555681	484789	94360	93275	94206	84085	106863	110131	110125	97470	78340	77910	84937	68696	502338	473894	481390	439724	207211	224530	195854	162163	910274	984538	892162	796456
13.2167	115506	119271	116491	105729	355108	353073	368256	318286	560123	565861	559639	509550	548969	547402	558103	479724	94675	93502	94665	85140	107113	110397	108076	98168	78982	78405	84209	68946	498042	475215	472835	446177	201766	222026	200415	160638	907908	995555	888260	798119
13.3	113945	118158	116336	107945	354363	352191	367522	323617	559962	566616	558162	506169	549013	554958	553805	485086	94634	93220	93785	84592	107751	110250	110413	98894	78079	77826	84603	69778	501904	469743	482034	448351	202924	224853	202976	160603	906213	983510	888687	802433
13.3833	112944	119712	114373	107395	352401	350800	364113	324925	560860	551682	559246	498615	541186	548682	554653	482713	95213	93544	93917	85258	107670	109771	108395	98012	78223	77845	84997	69456	491515	465803	485698	444296	206442	222818	197689	163379	904261	977758	881138	793206
13.4667	115631	116702	115203	107895	350540	354049	366994	323980	561342	557367	561397	508757	546923	550336	544509	476891	94670	93949	94152	84598	107951	110804	108915	97558	78109	78183	85295	69549	487625	468480	476705	445774	206101	221331	198210	161166	896355	974015	893019	792109
13.55	115326	117862	115163	106415	353859	351050	368068	322295	559801	558278	564966	503798	549618	553672	557201	479711	95223	93684	93817	84465	106099	110872	110204	98644	77504	78384	84848	69209	491274	470301	480849	445800	204902	217615	197032	162019	902534	967262	883706	801733
13.6333	113860	115142	114294	106597	351842	351316	365489	322440	560371	553286	560422	507687	544610	546500	563037	480499	94572	93597	93813	84386	106005	109435	107890	98690	78050	78198	84972	69677	490781	470026	472874	446300	205074	219832	204133	162079	894812	966675	880857	796079
13.7167	115791	114398	115439	107476	352601	354149	360756	320247	556591	555823	558181	504343	543770	547977	564566	482036	95379	93897	94537	85749	106469	112028	107550	97445	78377	77931	84855	69060	484853	464556	481941	451088	201247	221703	199961	163683	890289	976558	885547	797669
13.8	116483	119189	112450	105402	356398	352607	361483	322487	553471	551638	560892	514081	547118	554136	557433	483805	95332	93434	94705	84734	105497	108215	106643	97847	77840	78063	85353	69760	491945	459501	482086	445929	202094	216010	199802	165776	891665	966333	868431	791157
13.8833	113837	115919	114116	107911	346602	354778	369674	318929	552081	555939	560596	506649	540753	543147	555799	482942	95534	94096	94025	86239	106138	110700	108507	98504	78061	78158	84626	69242	485490	467170	475797	451228	199239	221009	198810	162452	887383	965485	872961	790749
13.9667	115525	116346	115128	105806	349029	352235	362222	318745	547815	552589	566841	513706	545117	544212	550987	478201	95618	94347	94236	85086	106267	110156	110500	98553	78087	78333	84448	69230	489412	469708	471705	439214	201651	217011	195701	160615	888682	962934	872575	788655
14.05	113830	114791	116092	105558	347985	352304	363410	321702	554167	550501	551734	508546	542624	547257	551757	481675	95393	93871	94961	85334	105671	111367	112311	98272	77833	77734	84949	69490	483344	463383	472711	439703	202901	218264	195483	161341	880891	951246	874736	794746
14.1333	114449	118774	116802	106570	351645	352640	360446	321482	545672	551059	560391	503561	538632	546218	554937	483731	94964	95482	95370	86169	107003	110491	108384	98539	77672	78093	84164	69278	479609	464843	472898	440977	197440	221942	199540	162985	885109	954004	866155	790659
14.2167	110869	117188	114541	107606	346240	347301	358321	318097	552178	548861	554762	509542	533000	543111	550495	481302	95538	93566	94957	86285	107293	111154	109772	99649	78768	77721	83991	69159	481263	462014	470785	449432	201451	219837	198676	165064	880010	956116	880490	791737
14.3	114813	116030	112808	106640	347911	342279	366798	322475	542588	553563	560699	506260	539336	546157	552654	485603	95734	94326	94134	86610	106907	112153	111158	99220	78320	77620	84011	69124	480611	455806	472275	442917	201526	221677	201064	164760	876794	952501	865091	782934
14.3833	113643	118236	115956	108541	349048	348654	366608	319870	546462	547010	560435	509875	537732	546571	550288	487480	94469	94656	94426	86691	106268	107496	109930	99299	78657	77862	85355	69111	478870	454860	469095	446593	200932	219519	200865	163077	878915	949782	871345	790645
14.4667	116199	116077	116152	106542	343113	355913	366224	324353	549344	543729	554864	503658	540009	547338	547549	485104	94993	95371	94360	87403	105932	109903	111343	99270	77937	77838	85119	68860	477506	451870	471129	448247	202214	216485	198822	167350	877301	954619	867060	796938
14.55	114445	113688	114372	106909	346235	347228	367506	322796	549750	546471	561317	505594	538327	539092	549975	486535	94778	93854	95259	86397	107379	111511	111837	98542	77919	78116	84269	68894	480117	456789	465984	441347	199940	217390	195529	159673	873779	949440	859700	777897
14.6333	112539	115627	115236	105363	340951	345097	359078	320961	541407	546444	559656	509709	534473	544839	553220	486202	95656	94975	95085	86261	107395	109237	109102	98733	77294	77923	85254	69258	473965	450616	469644	439878	199086	217305	197431	160377	873168	946528	861594	788185
14.7167	114381	117826	114988	106761	344185	351159	360675	319079	539893	547406	549481	506126	524773	546944	552867	493702	95174	95432	95788	86662	105569	111193	110125	98374	77835	77997	84657	69528	478331	451658	471124	439499	195462	220091	195672	159058	864867	948625	865586	785116
14.8	112769	111981	113222	106464	346967	348309	364949	325566	541960	539580	552293	511744	535030	544441	546210	486004	95231	94814	95445	87151	106398	109228	113248	99150	77648	77920	84178	69562	475281	452427	460742	439538	196374	219509	198910	163270	874980	940744	868129	792383
14.8833	111936	111685	112310	106026	345551	342657	360262	320566	544765	541391	554047	511671	527171	551623	555314	481427	95628	94887	93936	86769	105232	113884	108347	98491	77409	77739	84327	69062	472605	451950	469003	442383	199184	216252	194715	163144	865728	938111	861668	790349
14.9667	110672	115942	111604	106442	338216	347380	363116	320513	538858	540802	554913	506160	529570	543930	550539	487201	95429	95387	95697	87023	104769	110832	112222	98675	77544	77480	85024	68731	465390	450682	462431	438302	197654	217626	195316	159770	866016	942011	863402	786782
15.05	114383	114899	114457	102725	340193	347259	360089	323223	541318	547006	547006	506458	526276	538196	546566	487051	95663	95512	95154	87394	106906	112019	108640	97995	77080	77413	84399	69705	475400	452769	466516	433874	196661	217164	193222	161066	864902	928015	849131	789434
15.1333	111978	115763	111754	106002	343644	347954	363710	327774	538903	542484	547466	507771	532514	541105	551035	483862	95741	95238	95148	86798	106831	109705	110556	99715	78154	77963	85250	69489	464389	445533	465993	436190	194297	215011	193627	162501	866788	933153	856489	784905
15.2167	112413	113790	114950	105590	341269	340948	364714	323156	544238	541851	545428	511046	535029	537035	551337	483724	96215	95065	95684	87546	106492	111068	109035	99891	78127	78076	84324	69448	470740	448511	467960	430903	197267	219205	194697	162632	862562	928744	857023	777003
15.3	110506	114272	115857	106045	345413	346889	355138	324540	538045	538638	555552	500159	521688	535908	543206	478659	95544	95944	94892	86876	105520	110398	108802	100371	77960	77631	84416	69362	467355	453860	463361	433165	191210	215636	191372	162838	852775	935460	850833	779213
15.3833	113488	117231	111081	106860	345869	344048	364720	323834	536087	536449	551641	505284	524032	537074	548794	486297	96385	95428	95472	87687	105420	112401	111678	98935	77670	77087	84252	70468	463682	446897	465124	439031	201518	212099	198467	162630	851504	933030	850355	787205
15.4667	110086	115405	114444	106056	337539	343898	360623	322683	538250	538256	547128	499358	526849	536910	548870	485665	96318	94825	95000	87712	104172	110917	109362	98604	78406	77265	85347	69016	470729	441194	462765	435634	195070	215138	195775	164312	849802	921883	853577	780172
15.55	113967	113143	113844	105709	343176	342098	359472	321028	531959	535595	547370	501490	524276	532364	545880	485245	95826	95158	95386	87818	105511	110718	112789	98786	77764	77411	84763	69281	464144	446679	464049	431899	194233	214316	195008	162402	850347	924586	848934	780066
15.6333	110735	110961	113563	106779	338559	346643	355240	319505	537220	540205	547845	505359	524482	531908	547101	483993	95948	95319	96182	87995	107007	112479	110441	98619	77263	77645	85332	69614	468347	443846	462629	435385	201264	215614	194428	162974	845632	915207	842831	779516
15.7167	110057	117733	115438	106965	339672	345743	355868	324392	535003	537987	547105	508885	524543	537151	545235	492098	95571	95885	95808	87798	105771	113904	108469	99378	78179	77520	84511	69170	465159	442644	462770	439533	191203	216981	195004	161616	849630	911604	845079	769990
15.8	111186	114473	110087	105120	338492	341188	358704	323793	531357	534484	545981	509457	519925	531476	546400	483024	96639	96009	95928	88974	104711	113249	109338	99187	78752	77464	85448	69154	463715	441010	455326	438231	193941	208138	194527	163693	850761	915011	836461	780745
15.8833	109518	114530	112482	105461	336700	343163	358281	325789	536164	537709	550662	503417	529899	535126	546809	490515	96386	96282	95970	88202	106000	111447	110641	98916	78006	77819	85236	69180	458776	437047	458236	431491	197491	212374	189207	161671	842767	919996	840188	772319
15.9667	107711	113764	112874	105917	331698	342667	355097	322835	531613	534808	540876	503728	522808	528806	549466	490100	95878	95201	95640	88115	108460	108919	111642	99242	78134	78300	84917	69563	460861	443350	456961	437847	195227	211983	190162	162971	845595	914316	851419	782774
16.05	112020	115928	115676	106403	339683	342135	357039	319601	531493	534755	543763	503071	521043	527452	544885	486382	95619	96465	95491	88586	106451	113813	113886	98348	77569	77306	86022	69063	459336	442053	456317	429776	194102	212695	191618	160525	839487	908970	841526	771328
16.1333	111173	115037	110940	105185	336732	340612	355688	324459	528361	538764	544312	505357	519678	530752	536425	491062	96340	95707	95289	87770	105430	115236	109753	99461	77693	77681	84945	68670	457649	433704	454750	429454	194931	214715	193497	161348	836929	906803	838655	777310
16.2167	110776	112477	111151	106412	336807	339764	353653	323715	531847	533062	545638	506580	516300	528256	542387	485912	96630	96444	96250	88865	107140	110775	109976	99139	78244	77524	84592	68940	458992	435481	447984	428569	194302	209962	194850	160671	840882	904073	831343	774973
16.3	111390	115900	112476	105793	331286	346612	354669	321263	527962	527613	541229	503003	517144	534503	537890	485673	95711	96852	96466	88735	106426	110668	110625	98931	77575	77834	85725	69031	456548	435826	450960	430506	189634	213524	191366	164335	844277	918883	833282	770320
16.3833	107935	112840	112879	105922	333477	342955	359101	322572	529553	527502	538345	502217	517723	533232	542736	488471	95561	96276	95163	88696	107113	114137	112980	98774	77609	77394	84804	68895	460468	439651	450724	432311	190324	210727	191392	164860	834131	920734	827984	757572
16.4667	110082	114248	112626	105325	333651	344114	360889	323330	522888	527374	547220	504403	511630	528180	541029	483379	96459	96898	95755	87849	105687	109661	110872	99113	76687	77528	84551	68845	453248	435123	452200	429985	195559	209111	189275	158557	835008	906564	828204	765488
16.55	108193	113812	113885	104631	334129	338236	358966	321200	525736	533012	541331	500988	515645	532352	534114	483524	95563	96671	95598	89334	108444	111089	108537	98699	77588	76785	84590	68990	452068	440884	454814	432287	192822	207931	191280	160201	829082	906478	830796	767049
16.6333	108924	112642	113938	105107	334157	338076	356132	323130	526170	526616	544731	501309	516616	527388	540483	488903	96214	96285	96122	89391	108804	112791	111260	99734	77054	76949	84533	68501	450092	429625	450882	426832	192649	209616	191923	166306	828945	904198	821315	765170
16.7167	109305	117399	113527	105128	328955	331660	354821	320787	522641	524219	540563	510074	512910	526967	537223	485862	96628	97157	96392	89058	105729	111083	110726	99470	77354	77248	85074	68963	454452	430445	449647	427643	191148	208710	187985	165450	827081	906236	830756	765277
16.8	108665	115179	113889	105288	332779	336043	359932	322063	521128	524099	543685	501276	514819	527520	538949	484736	96770	96558	96164	88826	105308	116676	109832	99346	78839	77257	83827	69560	455565	431590	451064	430411	188622	209105	188568	158811	822077	903302	822224	763869
16.8833	108899	115610	114344	104863	332486	335808	352020	316353	523134	528639	533182	502617	515746	522921	536318	485026	96191	96652	96186	88978	105726	110452	110471	99266	77656	77541	84388	68916	449797	431465	451259	426620	189837	211883	188247	159483	825058	909001	824529	775572
16.9667	105478	113846	110243	104811	333921	333216	352972	321461	517705	518036	541275	508691	512335	529153	537794	486364	95636	96492	96289	88913	105037	111570	110487	98822	77933	76764	85237	68832	446654	433601	452047	425827	190062	209586	189653	159733	820672	900290	817751	768703
17.05	110368	112269	110013	105159	329953	333285	352185	318887	517502	516779	534086	496253	514435	525012	535721	484788	95742	96410	94749	89176	105947	112942	109463	98572	76782	77291	84376	68441	449920	427624	451817	433094	189032	208105	189759	162471	810382	891856	824386	760548
17.1333	107633	113655	111244	104689	331120	337866	355287	322813	520833	524668	538533	500656	510136	524410	538251	491111	95901	95798	95854	89257	107147	112403	110532	98608	77414	77108	84336	69305	448695	423993	447058	426003	189705	209710	190561	163691	816591	894728	825307	758294
17.2167	104485	113178	112826	105638	330651	336557	355783	323215	519375	519682	532280	502271	508184	524958	530952	482971	95806	97625	95908	89327	105942	112837	109720	99615	77117	77391	84478	68881	449132	426995	448461	427717	191032	210236	189162	162270	817245	899995	813451	760675
17.3	108890	113301	110898	104680	324744	337401	355935	318897	517538	523919	528248	498958	505149	522780	536072	481969	95283	96351	96139	89074	105340	112082	109921	98993	77657	77019	84974	68678	444553	426809	449067	426948	190903	206954	188934	161415	816512	895834	813555	762135
17.3833	108717	111304	109980	104925	328388	337320	353553	322944	512876	524250	529939	498550	510177	525355	527864	484481	95244	96357	95694	89566	106098	113716	111219	99320	76936	76674	84908	68924	442435	421766	447410	423501	189227	209251	191037	161233	817103	887231	805172	758926
17.4667	110593	112339	109917	105059	328775	337535	352219	324086	515435	524792	529584	497677	502328	520643	532767	484315	96593	96968	96269	89924	105920	114582	110947	99229	77012	77148	84611	68848	446626	429153	446608	427995	188140	208509	189960	162112	802480	885654	808651	754581
17.55	108190	110996	112925	103284	328648	336696	352139	323849	518220	521779	533495	501282	504995	522641	529737	482734	96110	97639	96424	89512	106568	110169	110022	98695	77308	77393	84431	69024	444175	424822	449303	420713	190024	205405	189917	159825	807350	882312	813713	750240
17.6333	109164	112421	111113	104803	329427	334398	352739	317366	516012	520021	532520	503087	507132	515070	533903	484938	96856	96300	96738	89710	106471	111958	110480	99230	76203	77600	84657	68726	440515	420159	449675	416826	187463	205418	185647	160797	799704	882870	812735	758579
17.7167	107988	110289	111257	103731	331106	332185	347068	319324	512449	521136	528284	497152	509204	522658	534211	484683	96417	96367	96079	90477	104844	114623	110099	98857	77201	77794	83340	68229	445565	423087	444058	423618	190930	206275	188222	162359	796362	869123	808068	752557
17.8	108416	112489	112577	104267	325617	332026	348812	325324	514060	517667	537772	497050	503681	515881	523853	485018	96236	96787	95900	90242	105667	109908	115016	98308	76471	78376	84810	68649	446912	422323	444312	417336	192341	207445	187836	163054	800079	866113	814212	751505
17.8833	108699	113654	110290	104057	325085	330947	354612	323491	510357	516199	528450	498081	499307	518309	529990	483883	96167	97356	96411	89982	104711	110373	112565	99615	76403	76540	84914	68681	445152	421964	437772	413867	191489	207480	187278	163078	796722	873499	799855	753491
17.9667	106954	111100	109268	104079	326731	335071	349481	321826	507177	513907	529488	500278	506402	520296	533150	477731	97191	97544	96081	90021	105698	111307	110359	99074	76711	76865	85119	68092	440321	422193	446761	418121	190025	205519	185407	162992	795925	875547	800077	748206
18.05	105991	110797	111096	103914	329837	334541	356263	321363	512513	516843	534274	493270	503946	515012	531631	486113	96950	97815	95889	90179	106217	112129	113887	99084	76619	77376	84928	68746	442273	419681	442456	415606	191147	206817	188695	161132	793242	860426	801072	748197
18.1333	108899	112862	111992	103414	321391	333635	346900	319892	505630	509182	523807	498120	503833	519387	532691	481266	96623	96921	95869	90002	106218	112611	110470	98783	77816	77818	84375	67798	435498	417768	438163	421529	186303	203854	188018	160521	795269	859494	802180	747019
18.2167	108745	112218	108088	103936	325395	327200	347630	316446	506960	519474	529244	495972	499260	508010	525068	489329	95811	97528	96617	89865	106170	112860	110918	99165	77211	77111	85455	68621	437420	414036	440611	422423	187542	204804	183450	159456	795949	860035	801154	746032
18.3	107518	112263	109587	103976	323887	331632	351139	318349	506885	510307	521578	499009	495184	509469	528132	483264	96605	96473	95788	89766	105773	113100	111054	99988	76579	77213	84039	68275	437858	417060	439474	417360	191425	203200	187233	158119	793750	878167	798847	745451
18.3833	107309	111741	109384	103386	322596	330500	350280	318355	502665	509767	535052	501309	501502	513671	530397	485031	96308	96277	95458	90388	106233	111670	108674	100420	76962	76165	84172	67846	438217	412075	439162	412884	184592	201775	184795	160655	780366	865460	792562	749703
18.4667	108788	109790	108522	103582	322962	326151	349897	315280	502801	510544	528152	500731	498444	518047	528175	483859	96938	97396	96490	90183	107239	112704	113756	100277	76771	76916	84600	67734	441107	411147	435144	414432	187724	204144	182393	156594	788274	868342	801070	741604
18.55	106050	109627	110435	104098	317071	329800	352374	318143	505547	515050	525995	497172	493826	513574	524073	478126	96596	96915	95638	91304	106109	112799	109460	99635	76539	77522	84362	68608	430997	416780	430908	412622	188694	204019	188835	157810	785262	860106	794255	745315
18.6333	108489	109519	109956	103156	324619	327306	350020	320587	500669	503380	527597	495832	489808	514050	529942	475125	96665	97263	96319	90369	106163	110158	109027	99214	76513	76888	84354	67913	431380	412377	437182	412865	182087	203433	184531	159699	780076	862509	794406	745989
18.7167	106876	112545	108371	103312	318411	326492	350146	318312	498605	506067	523767	494428	499901	506088	527007	481589	96118	97372	96087	90420	105708	112503	111560	99043	76693	76994	84176	67580	433669	418308	433730	415785	187319	199267	184621	161705	792628	859739	795064	740116
18.8					322324	325058	344621	316326	503677	505142	527638	489637	490384	510605	521914	481197	97076	97296	96277	90674	106417	110389	110409	99928	76414	77447	83677	68606	431950	405478	432728	406604	183621	201322	185806	156971	781226	854922	793797	736642
18.8833					320201	325898	342354	317220	494369	500712	523395	500410	487285	507539	524108	483303	96548	97016	95423	91222	106868	109645	111572	99458	76600	76931	84813	67320					181391	202340	186848	160554	779297	861246	787288	735654
18.9667					321046	326985	343347	316489	504205	506627	531044	490342	490837	507287	523468	481837	97031	97131	96051	90659	106293	111156	112007	99312	76283	75980	83758	67893					184795	201335	183693	156470	776784	852311	779069	735270
19.05					317587	323405	341991	316196	496382	505716	520073	496304	494001	511424	518608	477580	95888	97752	96451	91146	104788	111484	111952	99235	76518	76684	83403	68182					182157	200257	187852	158359	772552	855962	773209	737259
19.1333					316306	331625	346827	315394	495900	500435	521753	494413	494868	512144	530039	479077	96252	97431	96339	90616	105706	110594	111418	98776	75968	76868	83478	67873					185508	203628	184284	154220	777802	842121	777188	736464
19.2167					316830	331273	344720	315207	491578	504401	521500	493492	488725	511736	518737	475617	96963	97114	96101	91033	105673	111827	110405	99079	76511	76801	83810	67906					180256	199204	182801	158969	775736	849104	774599	729596
19.3					317710	324487	343290	312593	494435	504291	518015	494904	496605	514160	523653	474533	96169	97833	96326	90799	105163	113096	111050	98999	75889	76416	83172	67582					185053	196347	186838	159056	770336	848514	772345	731521
19.3833					320115	323465	345562	316415	496360	502466	523125	487688	482114	513033	521375	476682	96332	97366	95960	90807	105702	112263	110492	98488	77144	76753	83589	67995					182858	194499	181252	156103	777770	847771	774434	732692
19.4667					319595	321915	349603	309944	490240	501457	526005	496590	480702	505179	524418	474314	96350	98224	96254	90408	105499	109831	109233	98773	75867	76189	84067	67719					181210	199020	182925	154730	778807	844498	775027	727975
19.55					314324	329297	345039	315573	495221	505242	517012	489600	488863	503600	519643	478472	96977	97868	95806	91717	105574	112319	109876	100086	75187	76707	83948	67681					181693	199630	182281	157404	765833	848008	766524	728478
19.6333					313838	323079	343405	315028	492429	499337	513277	487902	488480	504616	519280	479910	95534	97120	96535	91200	104871	112407	112163	99636	75626	76893	84109	67852					180712	199557	184100	154851	767618	845951	768520	729011
19.7167					320768	324685	347473	310070	491913	502554	511760	496543	487882	505868	519832	477089	96817	97249	95851	91798	105077	113459	111815	99354	75952	77283	83715	67231					176373	199605	176376	156985	772983	846092	764038	722606
19.8					311523	323641	344165	310791	485406	499567	519225	490981	484709	494324	519078	473199	96502	97389	96526	91528	104923	110434	110672	98767	75451	76666	84158	67297					178461	198702	183019	161768	767648	839279	774775	721122
19.8833					317440	321626	337703	311033	486030	497462	515766	493755	481653	505936	518742	474797	96474	97460	95478	91407	104837	112311	111070	99949	75625	76617	83628	66799					180202	197591	179801	150800	760364	829940	770895	720499
19.9667					317875	322738	345422	314098	488819	498113	519247	488784	487788	505264	521349	472033	96321	98517	95488	90575	104368	112527	111792	98935	74860	76680	84252	67156					179207	197456	180682	156300	754715	829327	767289	725266
20.05					314382	324332	339344	316693	486769	493904	507193	493045	478224	496707	515712	475203	96251	97800	96799	92414	104566	113664	108217	99437	74933	76531	83600	67537					180852	196674	177893	157680	755644	828035	773247	709952
20.1333					314257	323333	344922	313436	485304	495743	514445	490568	482370	495490	515326	469941	96250	97575	96207	92128	105129	115979	110043	99274	75001	76385	83331	66991					175361	194764	179975	155605	758948	825697	770815	714120
20.2167					310555	322775	341980	313906	484520	494511	510079	487486	476907	497281	513525	475829	95291	98163	96150	91423	104199	109351	108933	98917									181367	193318	179185	156262	753736	828885	777351	720761
20.3					314093	324206	345318	310993	483941	501122	522792	489178	482062	498747	511580	468045	96018	97016	96084	91523	105027	113063	107990	99682									175741	198752	184619	158195	754020	822964	769566	704216
20.3833					309944	318257	340041	316900	483928	495474	510155	493318	473266	501822	515900	470406	95996	98251	96234	91720	104730	110460	109808	99543									177655	196689	179137	161075	752585	821560	768224	705910
20.4667					312322	321634	340813	314136	482380	488050	503782	485538	480991	502940	512451	470634	94950	98642	96141	92162	104793	109201	111251	99586									176340	196554	181873	156229	739712	825467	763269	705509
20.55					311761	315995	337653	311497	482462	494399	516721	485036	475943	497613	512066	476378	95738	98085	95699	92052	105092	111412	111833	98861									178158	194400	178057	156784	748558	821176	763145	699632
20.6333					311012	316903	344729	311329	475675	490407	508322	489737	480885	498731	517976	478821	95633	98111	95454	92047	105154	111383	109376	99086									178379	194155	179709	155295	751904	830051	766319	703946
20.7167					309559	320669	338826	313432	477623	491737	508186	485617	470983	499815	513688	471534	96005	97561	95512	93070	103859	110763	109277	98796									177009	190610	178163	158559	737512	828755	761432	702734
20.8					308508	320663	337736	313368	485832	488740	503143	482984	474947	495689	511640	476423	95031	98039	95569	92770	103669	112063	110867	99147									175251	187280	178294	157114	740895	822857	759508	696829
20.8833					306917	321040	339517	310841	480557	486917	507797	492961	472038	495965	505535	472359	95624	97562	95077	91802	104111	110750	108385	99616									175527	192871	178353	156360	737835	813621	762874	694261
20.9667					309747	317746	338423	315578	475877	484207	507719	489513	476322	492612	508109	472605	95386	98189	95814	91764	103648	112609	109492	99347									176434	193518	178600	156411	738556	818760	751962	700587
21.05					309055	312284	343922	310058	477451	483477	504665	485696	472441	498430	514161	468454	95826	96911	96479	91631	104313	109940	111586	98938									177839	191758	177672	155780	740699	811329	757144	702238
21.1333					310299	317599	340135	311506	478356	488546	505133	485971	472735	487304	515437	466632	95555	99649	96587	92028	104361	109283	110460	98823									177583	196364	176867	158228	734917	820124	753120	703763
21.2167					306286	314183	341379	314570	470959	478546	505870	484800	468354	489091	503753	465585	95689	97911	96448	93145	104019	110833	106998	99351									177011	191115	180005	153322	739267	817477	745514	702251
21.3					306897	312190	334971	312472	474368	485583	504091	485729	467289	491052	508757	468632	95259	97495	96757	92561	104356	111264	109293	99303									174181	194398	177899	158259	735021	810347	748041	696269
21.3833					311731	315431	337771	311163	477917	485194	505997	483960	468442	492068	508495	463747	95052	98214	96573	91649	103507	110528	111142	99304									174557	196017	174671	149450	735957	812805	744702	698131
21.4667					306596	317282	335719	310335	468675	483416	501677	479749	466555	488632	502783	471784	94682	97573	97042	92118	104042	112811	110028	98992									178004	191251	173781	155865	734163	805991	743640	700300
21.55					307685	308217	341834	311575	472994	480411	503115	490975	474970	487669	503019	470328	95357	97082	95376	92399	102850	111052	108369	99193									171448	192697	173416	153540	733396	802320	745140	701256
21.6333					304949	318726	333807	311069	470371	482650	501154	478395	470948	490027	512502	465076	95234	98094	95635	93136	103530	112720	109156	99345									174727	190327	171813	151557	734052	814361	750095	694559
21.7167					303825	311059	336027	308723	468470	482713	499769	488777	471759	489612	510987	469829	95476	97932	96298	92162	104048	111272	109700	99074									174158	191466	174154	151968	727943	802734	741399	689538
21.8					304911	316535	336794	307924	467908	473293	506534	483433	459685	487891	500361	465844	94940	97847	95926	92652	103254	110416	111298	98990									171430	194445	174359	153605	728207	804112	741813	691294
21.8833					301107	311619	337171	312129	467110	476174	500141	482181	466203	489878	504567	466586	95331	98416	95628	92932	102616	110255	109064	99378									171961	190755	173885	151267	727627	806704	738417	686621
21.9667					305328	312445	331023	309598	470050	478071	505100	479990	465384	490717	504749	464906	95125	97060	95666	92920	103478	112137	109764	98722									172874	190810	175831	151689	726571	799280	742572	693914
22.05					307982	315558	329641	308467	466797	480338	496621	484059	459625	484357	501013	466857	95077	98241	95671	92793	103202	109178	111739	99434									171707	190141	173805	152875	718794	804513	746672	694716
22.1333					301007	317204	334558	307059	461727	476682	499741	481438	460587	484157	498937	462473	95348	98947	95865	93347													171278	191427	175714	155086	722098	803895	741791	690197
22.2167					301928	315709	332481	306185	463799	481256	497797	481164	463750	481573	504671	469094	94886	97811	95152	93593													172577	192899	176016	150411	721739	800350	744708	692717
22.3					300603	311531	338929	308884	460993	475229	500471	480087	456167	487801	504906	465220	95759	97719	95797	93512													168566	190549	174394	149431	717601	801272	730582	689032
22.3833					304041	312399	332039	304959	466660	478587	498373	482954	456245	486210	506530	465794	94584	98398	95491	93239																	709953	795806	736526	676171
22.4667					306845	310432	333446	307716	463819	474251	496118	478957	453927	480676	504251	466141	95151	98205	96044	92560																	713245	794402	732944	687694
22.55					302375	315509	330018	309519	460777	470000	495826	476871	457351	485158	498114	461276	94746	97646	94997	92982																	713410	788374	725499	682949
22.6333					305211	309542	329776	302736	459375	479118	490656	479455	454821	481895	500425	462192	95111	98161	94946	92407																	712177	789551	725493	675508
22.7167					298592	310155	332872	303378	464018	477345	496318	480092	452824	478870	502210	465365	94770	97481	96283	92469																	708428	786643	728758	673841
22.8					296965	316913	325376	308612	457635	471898	493915	470574	453642	481205	494534	460652	95162	98321	95776	93174																	700989	789341	725218	668938
22.8833					300813	314742	329724	306031	457944	473598	496919	472838	452822	480927	496658	462853	94815	97700	96076	93465																	711699	790456	730746	673911
22.9667					298920	310932	326292	305359	456007	469454	496815	474399	451823	482268	497578	460614	95007	98320	95940	93242																	705472	798195	723836	675374
23.05					300750	314897	328915	307207	459527	474216	489995	476204	454274	476776	498966	461129	94783	97755	95915	92735																	697969	785802	728427	670492
23.1333					298258	313566	327111	305083	469287	471441	491318	471849	454516	480286	499674	463530	94792	98180	94988	93302																	701674	788115	719545	679516
23.2167					295867	310916	328310	306886	461854	467367	489032	471745	452360	477103	500629	462651	94235	97578	94969	92708																	703370	787314	722418	674929
23.3					295388	313092	324040	303819	458331	467229	487505	479136	455103	479141	492891	466966	95008	97817	95630	93345																	705276	784056	718433	663871
23.3833					301012	311310	321709	305766	456204	466013	488704	469217	451052	476494	500192	465289	94529	97493	94684	93356																	706064	776601	723994	673811
23.4667					295216	307892	327927	304551	453944	466217	479863	470758	448104	472627	497616	459679	94349	97807	95785	92593																	698199	787354	715675	674669
23.55					294851	310665	329239	301798	462463	459565	494135	469353	444367	467939	493955	457387	94737	97134	95385	94034																	698017	778865	715484	669991
23.6333					297247	304584	328554	301930	452271	461251	485813	464493	447114	478492	487962	461363	94701	97178	95114	93141																	702597	780744	725253	669138
23.7167					295803	313750	325095	303193	446410	460782	486857	465449	454504	468276	493264	462477	94519	97912	95214	93438																	696967	792561	713263	663652
23.8					292067	308290	326041	303043	447976	461807	479059	465092	443939	470546	493140	454716	94741	97505	95358	93806																	692692	775159	718594	666833
23.8833					298925	306430	329353	305119	450221	462534	491709	467138	453170	478803	496002	453892	94544	97202	94950	93261																	697234	778794	717837	662931
23.9667					291038	305745	324918	301137	452200	460543	481978	467241	446636	474869	492975	461125	93673	96869	95938	93453																	694145	776511	712480	656704
24.05					294024	302674	325139	304337	453672	460163	482337	466919	443991	468933	492175	465173	93781	97091	95513	93314																	690158	774838	712466	653808
24.1333					295707	306668	329935	301056	453575	458291	478160	465825	443726	469853	489099	451494	93405	98468	95394	93153																	690443	773755	710159	653104
24.2167					293687	303058	320696	304523	448784	468016	484988	469105	443744	468420	487899	456276	94141	97073	95055	93350																	689703	772862	708366	657458
24.3					291671	305384	321150	303738	447261	457516	478185	469562	445645	470378	486126	457063	93841	97871	94540	93038																	691373	774560	710559	659409
24.3833					294179	306171	322830	303457	447589	465255	482119	461005	437703	474623	491753	455143	94093	98137	94920	93833																	691874	782999	700292	662425
24.4667					293281	308626	324639	300056	449119	460376	476110	463222	447217	470347	490887	456604	93530	97615	95183	93048																	677592	778920	708058	654591
24.55					294381	307118	324227	300054	447967	456979	480266	465659	443859	470741	489046	453352	93679	97236	95041	93702																	689154	765188	704144	661860
24.6333					290423	310104	323143	296723	448807	454247	472321	463538	438011	464420	490165	453304	94768	97581	94951	93073																	685496	765157	702065	659740
24.7167					289125	302974	320062	301765	443144	455815	476859	467735	436664	470101	487011	451472	94823	97413	95077	93843																	684978	766441	698703	653784
24.8					291124	307854	317784	297523	439763	457859	481450	465813	439549	464956	481388	452248	93758	97949	94466	93323																	685629	769041	698265	646203
24.8833					290380	300874	320358	298056	441526	456676	476343	467524	439591	462293	486327	450871	94352	97477	94521	93255																	682916	759404	705615	654030
24.9667					285338	298502	320036	300701	440291	453743	475791	466309	437833	468380	483968	457306	94576	97410	94678	93554																	679731	756568	693575	648956
25.05					283364	305416	320096	304298	438285	455419	479290	457735	438846	470441	481946	450902	93462	98224	94160	93028																	674075	761210	695628	644790
25.1333					288177	302936	323812	297457	442184	452105	473792	461912	438499	468568	486695	452318	94354	97525	94014	93483																	674471	755354	689830	643371
