# Supplementary material for: Rate-limiting transport of positively charged arginine residues through the Sec-machinery is integral to the mechanism of protein secretion
Source: eLife. 2022 Apr 29;11:e77586. doi: 10.7554/eLife.77586 (PMC9110029; doi:10.7554/eLife.77586)
Supplement: Figure 7—source data 1. [file elife-77586-fig7-data1.xlsx]

## Sheet: Sheet1
time from injection (min)	wt	FW	LA	FW	LA	FW	LA	wt	∆φ1	LXX	EQ	∆h1	TV	∆φ2	∆h3	wt	QR	∆h2	AL	TV	∆φ1	LXX	wt	IT	EQ	QK	KQ	RK	∆φ3	QE	wt	LXX	∆φ2	KR	RQ	∆h1	∆h3	wt	∆φ3	QE	QR	∆h2	AL	TV	∆φ1	wt	∆h1	∆h3	IT
-8.1	112200	107776	137216	104972	123852	97528	119966	114048	133677	124395	125270	135095	125199	138441	132474	76867	76163	89662	71562	73123	81150	73485	78143	94383	71111	77106	76809	83092	87529	71500	50304	54401	61060	53871	60632	54494	60679	48441	65948	53481	53755	60935	43300	42733	50698	63434	69375	80811	81724
-8.01667	112357	109982	139956	106923	131989	99520	125838	116864	134259	121625	125901	134565	123648	138654	136115	78155	77673	91316	73225	74896	83310	75776	78966	95272	73329	78533	75886	84214	88525	72232	51321	55437	62365	54325	61955	55745	62719	49807	67939	54647	55355	62267	45337	44190	52004	65586	71036	82522	84377
-7.93333	112507	110538	142784	107080	134237	101527	131057	116268	134787	125330	126244	135032	126188	135207	137039	78659	79412	92537	75147	76273	84463	77302	80113	96931	73533	79219	76709	85678	91194	74192	52261	56250	62262	56466	63373	57753	64159	51185	68994	55206	57106	63774	46720	45591	54215	67259	72902	84353	85098
-7.85	113449	113372	141607	109101	135714	104318	133257	118748	135234	127387	128745	136578	126693	140102	138900	80623	79575	93901	76091	77426	86141	80177	81453	97632	74356	79957	76546	87268	91280	75768	53392	56828	64398	57192	64374	58588	65217	52559	69538	55624	58156	65518	48379	47314	55146	68635	74083	86257	86443
-7.76667	116059	116268	144080	112132	135840	104812	136180	120637	138270	126889	128413	137735	128124	137496	139065	81310	81136	94102	77017	79050	87111	80278	81681	98664	75085	82075	77613	87025	92060	76841	54588	58283	65644	58187	66148	59381	66755	53249	70787	57086	59597	66219	50092	48879	56466	69643	75985	88371	89287
-7.68333	116675	113412	148008	109471	139209	105884	136707	124658	135773	130117	129690	135720	127412	137567	136660	82522	82873	95880	78751	79673	88365	82552	83107	99618	76331	82182	76993	87445	92610	77480	55560	59188	65656	58873	66771	60276	67038	54209	72075	57583	60898	67669	51122	48912	57906	70672	77609	88742	90865
-7.6	117791	116470	146287	114571	138759	105229	140099	119095	138041	128527	128078	137941	124213	145259	138162	83101	84132	96702	79220	81272	89305	83076	83232	100244	76524	82909	76954	88352	93384	78638	55504	60146	66975	58938	68066	60728	68574	55079	72052	58397	61635	68043	52327	50206	59067	71301	78049	90156	91074
-7.51667	119031	113627	151018	111369	138313	109643	138184	118972	136827	127792	125975	140271	126729	140894	137599	83284	84579	97174	79974	82754	89101	84584	83669	100089	76478	82721	78080	89934	94450	79561	56618	60421	67418	59858	68781	62000	69697	55989	73329	58244	62695	69159	52525	51115	59820	72930	80042	90753	92388
-7.43333	118766	114038	150258	112052	141425	107946	143638	121953	136559	127957	131812	137160	130711	142731	137066	84550	84945	98642	80568	82540	90608	85009	85120	101176	77289	83065	77200	89920	94984	79307	57387	61044	67362	60940	68537	62435	70167	56657	73888	59146	62930	70569	53382	51854	60445	73518	80448	92106	93605
-7.35	118775	117962	148013	111857	142236	108084	143387	124105	135043	127840	124941	136408	126028	140882	142342	84788	86032	98764	81195	83107	91540	85469	85198	100963	77422	83414	77839	89848	95207	79934	57992	61898	67704	61444	69921	62821	70017	57206	73705	59760	63441	70450	54255	52394	61226	75259	81046	93452	95242
-7.26667	120396	118190	153652	114482	146812	109433	143944	125174	135745	130588	127508	135122	126507	140705	137298	84350	86148	99311	81183	84869	91835	86900	85569	102050	78530	84614	79033	90401	95419	81453	59127	61960	68145	61450	69454	63562	71388	57214	75300	59872	64245	71257	54595	53166	62334	75956	82107	92847	94827
-7.18333	121795	113111	150243	113969	144173	109254	145053	121565	137746	128069	126081	136994	128412	139613	139727	84766	86710	99294	81928	83896	92373	88436	85291	102812	78128	84629	78445	90507	95813	80979	59068	62421	68728	60994	70900	64033	71767	58348	74691	60298	65971	71348	55946	53880	63366	76339	83098	94812	95831
-7.1	120760	117813	148170	113931	148139	108094	143708	122340	138990	129506	127361	135017	131268	141835	139003	85989	86123	99827	82253	85410	92832	88847	86847	101755	79222	84529	78657	90298	96593	81640	59728	63116	69158	62396	71174	64001	71739	58409	75750	60429	64843	71291	56036	54632	63195	77116	83165	94638	95300
-7.01667	120498	114453	151246	112378	143878	111617	142740	118398	136490	128750	128009	136695	126695	140496	138691	86001	87391	100962	82598	85634	92303	88708	86120	102870	79323	85060	78106	91126	96832	82369	60155	63275	69147	62418	70470	64694	72564	59332	75875	61382	66188	71794	56902	54736	64010	77665	84166	94828	96676
-6.93333	122914	117576	150166	113504	141171	110953	144417	122200	135851	127380	126813	136729	128570	143352	139695	86866	87875	100372	83469	85408	93004	89495	87315	102995	79346	85418	77978	91205	97160	82862	60170	63303	69879	63271	71863	64525	73007	60460	75929	61044	66703	72414	56749	55449	64105	78036	84273	95542	96571
-6.85	120983	117579	150012	115066	145629	110420	142929	123716	138005	128249	127361	135859	127487	139528	140943	86855	89133	100916	83718	85990	93763	90029	87073	102540	79692	85276	78412	91332	97088	83496	60680	63928	69710	62928	72347	64720	73451	60305	76928	61592	67660	72717	57384	55696	64642	79107	85443	96486	98564
-6.76667	120886	119107	148478	113968	144231	109258	143501	122937	137589	126623	127046	138603	129577	141912	143729	86365	88888	100447	84393	86212	94308	90374	88099	103227	80755	85295	78671	92139	97470	83598	60788	64411	69812	63294	72200	65645	74147	60923	76542	61586	67238	73490	58035	56381	65469	79641	85864	96069	98961
-6.68333	118896	116328	150521	114767	147121	109585	142003	121511	134565	129712	128608	135384	127768	140951	134800	87111	88159	101098	84090	86660	93976	90465	88348	104061	80191	86107	78192	92268	97811	83813	61346	64100	70190	63551	73455	65640	73924	61213	76960	62424	68696	73730	58251	56747	66328	80030	85765	96356	99029
-6.6	118151	117731	151306	113343	146832	111243	144858	123703	134583	128956	126299	136496	127345	141990	139676	87883	89769	101561	84436	86175	94381	91906	88963	104196	80088	85937	78576	91898	97737	83814	61349	65139	70171	64297	72753	66192	74172	62155	77340	62028	68423	73658	58917	56541	66786	80004	86975	97366	99176
-6.51667	122230	115918	152518	112639	146166	114220	143276	119198	137084	125215	127451	133785	128396	141388	141649	88093	88612	101540	84837	86775	94530	91579	89240	103599	80658	85910	78764	92677	97992	85408	61745	64774	70914	64422	73102	66516	74181	62313	77677	62019	69103	73897	59316	57890	66897	80421	87219	97254	98953
-6.43333	121582	118074	147857	112349	144471	110264	146540	123514	135352	126726	127786	135947	128049	140945	139183	88257	89378	102319	83899	87335	94307	92452	89039	103781	81573	86662	79441	92561	97809	85475	62076	65048	70766	64375	73791	66305	74897	63173	77676	63045	68744	74322	59709	57730	67148	81042	87405	98214	99597
-6.35	122930	118937	150504	115983	147023	110810	146477	124224	138969	125165	130081	137877	126607	138746	138583	88321	90021	102158	85325	86601	95769	92440	88478	104405	80420	85537	78935	92311	98548	85027	62835	65347	71429	63981	73540	67049	75059	62997	77990	62617	69772	73897	60490	57906	67277	81309	87260	97770	99201
-6.26667	120197	113622	149990	115133	146791	112713	146478	121240	136018	128445	129060	137420	126408	140372	138787	88563	89878	101872	84997	86879	94462	92132	89272	105607	81387	86757	79475	92854	97524	85113	62756	65964	71502	64380	74078	67032	75850	62367	77831	63275	69727	75030	60556	58612	67931	81532	87626	97585	99720
-6.18333	121038	116309	147551	117513	145205	110353	146186	122287	135344	126405	125455	135257	126276	140502	141447	88168	90278	102491	85179	87390	95465	92427	90238	104231	81200	86536	78870	93362	98602	85116	63480	66113	71022	64986	74066	67293	75321	63356	77854	62464	69767	75082	60693	58763	67936	82712	87391	98842	100364
-6.1	118671	117508	150715	112808	144443	110157	145729	120705	136079	125599	126794	136143	127148	137609	140469	88032	89703	101593	85861	88950	95808	93068	89880	104028	81572	86576	78819	93173	98518	85444	62916	66295	71710	64822	73855	67411	75120	63627	77681	62890	69778	75444	60357	58124	68159	82535	88180	99265	100052
-6.01667	121444	117004	150858	117184	142726	112379	145972	121056	134266	128050	128036	135959	125646	141528	137873	88719	90454	101928	85449	88051	95226	92754	89756	104663	81300	87371	78884	92811	99560	85872	63461	67166	71494	65082	73789	67794	75917	63926	79002	62881	69850	74974	60873	59199	68479	83536	89064	99299	101254
-5.93333	120149	121588	151308	111133	146617	112407	143489	122704	138274	128057	128994	133414	125415	141538	136913	89014	90531	101371	84954	88301	95093	94006	90608	106141	81512	86464	80154	93614	98211	85612	63889	66294	71871	65194	74398	68300	76331	64428	78070	63129	70088	74839	60904	59668	68502	83519	89070	98841	101635
-5.85	121157	118198	149684	112080	145042	112264	148049	119372	136311	123655	129288	133005	130606	143212	142285	89462	90629	103082	85744	87781	94762	93936	90656	104948	82309	87188	79673	93467	98590	86125	63456	67005	71739	65669	75307	68037	75792	64787	79461	62992	70870	75492	61847	59785	68522	83917	90298	99132	101341
-5.76667	123239	116576	149948	113867	145154	113541	145031	124118	134561	125533	126342	137562	124371	140936	137461	89110	90656	103245	84827	88515	95543	93740	91214	104838	82455	87089	79587	93406	99092	85753	64667	66690	71906	65409	74880	68246	76948	64912	78891	63347	70017	75341	61459	59844	69298	83973	89661	99399	100738
-5.68333	123924	115819	150450	113283	142712	114255	146807	121500	134734	126652	127444	134054	128697	140640	141723	89797	91079	102673	85920	88140	95990	94127	91608	106579	82263	87818	79772	93381	98927	86375	64759	66948	72245	64880	75022	68573	76577	64647	79449	63329	70641	76254	61809	59817	69467	83937	90338	99646	101137
-5.6	123595	115152	149772	116577	145379	112722	148292	120849	134840	125278	130574	135307	126155	139659	138319	89960	90508	103578	84647	89041	95152	94196	89923	103756	82759	87219	79770	93173	99492	87140	64719	66970	71668	65295	75187	67940	77303	65222	79385	63699	70965	75534	61992	60376	69404	84318	90192	99715	101654
-5.51667	122027	115656	150489	111948	146169	110010	149979	123418	133787	125946	127912	133850	128968	139536	137693	90050	90609	103326	85969	88860	95402	93954	91351	105637	82227	87594	79282	94226	99453	87139	64846	66560	72385	65467	75683	68326	76754	65358	79854	63777	70297	75262	62108	59871	69631	85080	89984	99534	101281
-5.43333	122936	117856	146578	115492	144939	111372	143228	120359	133274	122788	127266	134323	126198	139645	140804	89206	90459	102596	85595	88531	95429	94303	91550	106678	82593	87994	79635	93649	98250	86339	65347	67196	72852	65690	76027	68731	76452	65939	79336	64085	71344	76407	62797	60887	70094	85788	90699	100107	100923
-5.35	122117	117592	149555	112873	146386	111441	144467	121882	135095	126747	124321	133276	128520	142377	140139	90004	90719	103346	85561	88517	96114	94746	91257	106483	82617	87973	79788	93478	99482	87300	65422	68262	72700	65444	74999	68729	77159	66333	78840	64291	70164	76082	62618	61043	70181	85885	90782	100030	101192
-5.26667	121855	117397	147783	115362	145399	113244	143686	122726	132800	126373	124301	132536	128216	138652	139084	89738	90566	103410	85309	88741	96325	95126	91141	106001	82737	88143	79836	94382	98777	87427	65383	68449	72765	65802	75712	68943	77356	66047	79074	63955	70521	76185	62302	61361	70679	85829	91372	100263	101449
-5.18333	121658	117444	149366	114592	143302	110725	148148	124328	129740	126167	126266	134242	128005	139415	139525	89592	89997	103867	85155	88465	95714	95575	91548	106142	83101	88184	80381	93815	98792	86508	66121	67643	73048	66248	76320	68739	77087	66022	78879	63923	70863	76037	62573	61106	70285	86352	91447	100800	101631
-5.1	120220	116727	146638	114002	142562	111104	143810	121199	134378	125206	126459	133298	124372	135938	139018	89466	90557	102842	85604	89040	95958	95190	92069	106111	83006	88092	80418	94214	98397	86995	65694	67637	72560	66173	75664	68274	77506	65976	79405	64302	70420	75767	63318	62187	70604	86559	91359	99952	102213
-5.01667	120347	118413	147945	114722	145693	113704	142804	121921	134006	125548	126928	132210	126767	138431	138691	89889	89923	103576	86805	88463	95962	94937	90865	105555	82975	88672	80773	94351	99220	87626	66610	68222	72194	66192	75834	69318	78451	66693	80350	64089	71272	76632	63020	61926	70298	86540	91047	100169	102217
-4.93333	120468	117454	146096	109990	145147	110315	145296	121401	132726	123917	124690	131670	128687	138211	136294	89395	90661	103573	85420	89560	96340	94668	92541	105201	83854	88170	80380	93797	99132	86817	66181	68830	73119	65760	76429	69260	78187	66770	79124	64621	71386	75642	63707	60971	70871	85962	92207	100926	102029
-4.85	121455	118549	151652	113697	145214	110976	147959	120492	133485	122733	124128	131512	125213	140803	137468	90213	90020	104004	85855	88660	95302	95362	91233	106011	83306	88452	80031	94626	98671	87467	66527	68726	73193	66845	76446	69784	77992	67260	79759	64103	70980	75868	63143	61888	71945	86382	92368	99522	102445
-4.76667	122281	115451	146061	116059	141848	113148	149951	124071	132606	124118	126024	134732	125862	138599	135616	90046	90413	103738	85917	89546	96128	94495	92808	105233	84137	88652	79829	93996	99369	87319	66875	68023	73488	66107	75781	69020	77961	67013	79893	64134	71931	75380	63051	61887	71010	85920	91840	100039	103063
-4.68333	123503	116074	146983	109924	147851	112748	146187	124067	131912	124883	124850	130296	126218	138243	139799	90279	90361	103098	85791	89456	95665	95546	92777	104966	82968	88390	80707	93997	99433	86693	65894	69588	73205	66130	76875	69754	77793	67124	79338	64051	71830	76967	63487	62076	70936	87313	92000	100068	101686
-4.6	123108	113584	147602	114852	144653	111350	147171	121940	132581	119743	123527	134341	124387	138715	141108	89771	90543	103677	85956	89318	96324	94596	91649	104907	83626	87883	80302	94631	98897	86971	66994	68604	73100	67008	76775	68839	78173	67401	79521	64448	71762	76080	63643	62337	71988	87062	92037	100400	101436
-4.51667	120411	114778	143590	111702	144504	113613	144940	121515	133690	123833	125387	133123	125363	135399	138326	89630	90558	103456	86103	88916	96041	94582	92272	107159	83765	88138	80302	95085	98547	87811	67008	68656	72772	67151	76764	69636	77926	67642	79841	63972	71110	76793	63641	62293	71298	86824	92616	100547	102127
-4.43333	121574	116675	149096	111394	141353	114499	147402	119251	132658	127827	127445	130111	124016	138145	136946	89805	89306	103339	85379	88672	95214	94615	92752	106685	83661	88375	80438	94697	99781	87857	67638	68918	73376	67110	76637	69372	78689	67332	80013	64586	71254	76553	64522	61960	72069	87184	93653	100854	103013
-4.35	124384	117343	148295	111460	148378	113307	146155	118856	130417	122793	121311	131296	125376	137895	141163	90148	89388	104051	85439	88866	95343	94777	92944	108025	84570	88360	80215	94429	98262	88422	67344	69814	72855	66783	76979	69880	78300	67620	79921	64842	71318	76912	64236	62791	71601	87011	93141	100041	102056
-4.26667	121491	116280	147601	111468	143554	112314	144774	121281	131892	120794	123708	130118	125177	139549	137406	90826	88863	103994	85808	88639	95689	95428	92294	107227	83398	88680	80464	93688	99111	87632	67883	68507	73380	66795	76933	69834	78410	67426	80192	64691	71000	75796	64270	62048	71936	87239	93608	99846	101969
-4.18333	123654	114268	148207	114969	145747	110015	145814	121803	132478	123004	123198	131442	123097	138293	135811	90069	89450	103048	86400	89200	96239	94022	93123	106342	83551	89985	79718	95173	99320	87294	67536	69160	73619	66635	77541	69591	79273	68184	80177	64559	72009	76613	64553	62383	71608	87392	93674	99879	102662
-4.1	122578	114567	146725	113033	143854	113450	147488	123451	132078	120512	121375	127432	124210	136473	136357	89685	88877	103128	86451	89439	95367	95365	92571	105887	83969	87944	80569	94578	99755	87935	67921	69235	73171	67149	77070	69916	78334	68524	80659	64984	71900	76272	63800	63360	72355	87333	93134	99692	101859
-4.01667	122303	114165	145526	109712	142209	113495	144045	119197	132262	120515	124384	131658	124970	139093	136806	90673	89578	102821	85428	88901	94674	95233	93150	107360	84523	88182	80028	94928	98602	88305	67617	68922	73162	67101	77426	70527	78812	68912	80530	64551	71384	76441	64435	63197	72228	87212	93918	101001	102614
-3.93333	122977	114961	144749	111673	147212	110175	144938	121404	131287	120861	121858	127892	122234	137244	138633	89710	89226	102927	85776	89357	96143	95878	93679	107793	83698	88994	80123	94602	99106	87948	68023	69535	73368	67193	77523	70545	78813	68152	79844	64767	71825	76798	64263	63047	72272	87114	93322	100167	102375
-3.85	119614	115369	144194	113610	140064	112574	144850	122294	130371	123629	122163	130324	121444	136102	138016	89904	88976	102551	85239	88584	95001	95451	93143	105514	83279	88917	80948	95286	99150	88087	68742	69933	74091	67280	77620	70045	79182	68246	80299	64873	71887	77033	64187	63139	72437	87489	93221	100088	102692
-3.76667	122140	113008	147106	110478	142822	112003	145463	119591	129375	122154	118955	128943	123921	135655	139189	89390	88615	103226	86003	88579	94903	94440	93051	105171	84361	88438	81096	94764	99148	87888	68634	69979	74229	66442	78217	70002	79228	68297	80829	64856	71997	76736	64772	62474	73305	87600	93175	100821	101880
-3.68333	122387	114303	143779	111343	142174	111630	146038	122336	132169	121043	121068	129136	121558	136351	138560	89823	88840	103117	85827	89335	94931	95847	93035	107306	84458	89531	79921	94812	98383	88468	68575	69946	73322	66909	78002	70310	78975	67804	80495	64982	70821	76001	64897	63226	72168	87582	93327	101003	102326
-3.6	121150	114166	145391	113183	145153	111815	146223	118831	130661	119537	121562	127052	121998	135399	136022	88849	88791	102787	85909	88231	94647	95852	93362	105749	83736	88942	80765	95449	98369	87751	68856	70135	73134	66757	77354	70164	78856	68597	80358	65163	71812	76099	65029	63508	71796	87444	93583	100470	102857
-3.51667	120447	114448	143690	111966	142750	113580	145734	118829	130169	121183	119932	127841	122706	136624	135157	89653	88765	103369	85682	87864	95549	94988	94195	105483	84545	88600	80101	94965	98677	88626	68679	70760	73736	67379	77955	70178	78525	68552	80562	65415	70681	77094	64763	63651	72487	88074	93343	99894	102854
-3.43333	118849	113009	142558	112096	143756	108993	143622	118876	130689	118722	120106	127467	125554	138480	133580	89380	87727	103358	85387	88322	94904	94713	94306	106285	83651	89261	80389	95343	98565	87551	68233	70086	74140	67215	77910	70591	79037	68473	80099	65101	72073	76238	65011	63187	72489	88372	93469	99839	102537
-3.35	121247	117115	143951	108266	142357	112854	145298	118358	131973	119234	120779	125776	125881	135647	136656	89992	88059	102725	85221	88285	94592	94918	93587	105534	83952	88973	80865	95110	98172	88860	69209	69983	74056	67696	77965	70319	78835	68710	80087	65243	72138	76107	64654	63381	71773	88227	93195	99499	102546
-3.26667	120588	117046	144201	111906	143742	113810	146701	119183	131006	120489	118478	127035	120168	139004	135766	89479	87720	103516	86009	88331	95467	95100	94188	107594	84116	88719	81019	95529	98299	87976	68604	70239	72948	67214	77687	70921	79204	68509	79796	65239	71772	76510	65325	63443	72292	87597	92838	100287	102315
-3.18333	119851	112951	142743	110223	142642	109703	142771	118673	130655	117773	118958	126570	121594	134302	135598	89542	87928	102516	85632	88585	94495	95083	93245	106054	84995	89662	80205	94727	99389	88019	69830	70759	73990	67273	78112	70800	79219	68984	80512	65336	71731	76616	65199	63567	72774	87382	93468	99261	101648
-3.1	121206	112853	143352	112636	143330	112391	143568	117840	128336	118497	121405	126887	122703	135043	137294	89715	86636	103611	85232	88653	95180	95092	93873	106731	84397	88889	80726	95848	98616	88148	68362	70746	73694	67264	78967	70135	79078	68583	80337	65148	71817	75721	65173	63342	72040	87603	93551	100513	102976
-3.01667	120152	112748	145496	109645	142626	110098	144346	120513	128352	120318	122953	126508	120587	137061	138704	89243	87005	102893	85357	88748	94896	94663	93381	107794	84097	89096	80217	95859	99027	88258	69353	70768	74023	67953	78653	70156	79494	68017	80298	65179	71953	76753	65517	63879	72767	87676	93334	100177	102660
-2.93333	122096	113750	141512	112295	140935	111610	142578	118794	129306	118253	120286	125959	120964	133962	134591	89610	86561	102742	84945	88829	94354	94812	93713	106362	83575	89645	80345	95647	98757	87441	69326	70406	74194	67519	78011	71695	79757	68561	79693	65078	72242	76805	64833	63902	72658	87544	93542	99531	102772
-2.85	121093	115106	142248	110231	140279	109405	146796	118821	127955	118290	121890	126147	118125	134098	136151	89148	86384	103278	85391	88148	95150	95301	94042	109164	83659	89039	80256	95371	98491	88771	68598	70713	73581	67239	78913	71246	78915	69254	81034	64926	71998	76995	65053	63658	72641	87510	92943	100129	102118
-2.76667	123056	112877	138808	111002	140872	111457	147284	117357	128207	115024	122065	126262	117810	132705	136496	89460	86790	102321	85276	87942	94148	94854	93413	108802	83842	88399	80670	94590	98073	88092	68939	70480	74381	67725	78680	70741	79224	69216	80567	65374	72556	76484	65583	63929	72760	87848	93222	99806	101555
-2.68333	119299	111496	144379	111853	143005	109465	144698	118884	128350	117345	119407	125163	117788	133094	133566	89660	85951	102476	84979	87833	93957	94088	93652	106692	84453	88813	80142	95270	98973	87462	69722	70398	73599	68010	79226	71062	78885	69173	80775	65199	71483	76646	64868	64548	72830	88363	94047	99388	101410
-2.6	118391	110706	144067	107532	143296	109976	142542	119486	127245	119246	120606	124409	120922	136176	132493	89465	85311	101639	85592	87275	93696	94635	93711	106806	84254	89333	81246	95187	97777	88085	70020	71398	74481	67746	78620	70643	79423	69076	80609	64840	71544	76555	65319	64395	72954	87856	93748	99697	101396
-2.51667	118906	114544	144672	108125	137816	111416	142654	115247	128109	120046	117969	123939	118077	134175	135339	88910	85323	102052	84507	87654	93632	94073	94029	106404	83726	89443	80603	95717	98179	87939	69409	71016	73759	67593	78665	70753	79736	68127	81219	64671	71725	76857	65398	64426	73107	87884	93399	100065	101298
-2.43333	118473	112532	140072	111694	140966	111710	144064	116566	127451	117136	120339	123735	117394	133080	132687	89403	85098	101941	83842	87631	93515	93672	94136	108174	83879	89296	80322	94729	98328	87095	69957	70428	74144	67863	78429	70773	80316	68915	80725	65463	71592	76371	65349	64159	72588	87588	93921	99925	101751
-2.35	118281	113970	140205	111289	138946	109448	140772	116036	128333	117180	120648	125401	117535	133558	130707	88755	84619	102629	84954	87995	93517	94326	93831	106781	84221	88456	80363	94439	98331	88175	69398	71376	74444	67565	78652	71146	79723	68711	81389	65514	71551	75923	65288	64254	72561	87575	93767	100626	102127
-2.26667	116615	111625	140667	110274	137353	111543	141806	117448	129362	115868	119727	126565	119926	133741	132904	88617	85168	101558	85224	87580	93757	94799	93965	106720	83200	88916	80356	94516	98158	88142	69927	71080	73711	68303	79501	71126	79549	69213	80204	64724	72016	76198	65705	64158	72811	87736	93604	100172	101098
-2.18333	119514	112489	142734	111476	140288	109663	142505	117462	130680	116660	116787	125922	118746	136072	133267	89747	85369	102708	85187	87685	92454	94305	93331	105187	84511	88860	80151	95444	97440	88168	69685	70855	74099	68174	79511	71028	79613	69320	80579	64777	72143	76503	65947	64191	73355	87936	93926	99861	102245
-2.1	119316	113135	139351	107881	139977	108738	143207	115460	127246	118014	117775	123528	120060	134895	133720	88238	85052	101837	84600	87799	92755	94486	94216	106689	83165	89580	80368	95071	97785	87787	70032	70754	74398	68015	78039	70647	78961	68334	80474	64579	71585	75815	65115	63988	72643	87632	93780	99539	102248
-2.01667	118923	112233	142940	111219	140757	111614	142121	117694	123562	119789	117303	124695	117906	132301	132661	88502	84452	101835	84229	87252	92813	95179	93534	106878	83843	88858	80133	94576	97451	88027	69606	70887	74713	67724	79122	70560	79106	69356	80949	65236	72499	76810	64935	64170	72794	87519	93394	99511	100808
-1.93333	114346	113177	140081	107253	140350	109524	143413	117709	126097	117940	117183	124889	120537	130418	135866	89364	84324	101850	84592	87038	92737	94611	94636	107908	83858	89880	80928	95161	97195	87770	69839	70643	74263	68385	78673	71451	80001	69534	80955	65414	71608	76348	65199	64306	72888	87364	93936	99569	100779
-1.85	116873	111633	139352	108477	140605	109045	139971	116754	127464	119076	119008	124437	117058	132128	131563	88776	84462	101674	83843	87145	92935	93244	93938	108674	84223	89256	80235	94847	96794	87632	69770	70653	74049	68286	78845	70773	79112	69030	80175	64796	71195	76735	65624	63927	72053	87519	93619	100336	101578
-1.76667	118007	111523	141818	108496	143176	109474	141209	118640	124447	116261	113924	120585	118873	134922	132001	88203	84090	101623	84634	87249	92925	93996	93819	107484	83983	88222	79173	95363	97075	88235	69816	71105	73662	67319	79132	70333	80613	68486	81212	65379	71278	76647	65692	64464	72187	87419	93918	99374	101225
-1.68333	116767	109239	139635	110394	137683	109380	140828	117361	127309	118178	118891	120949	115912	131437	132039	89506	83474	100742	84236	88095	92453	94576	93798	106218	83767	89168	79953	94619	97292	87872	69583	71413	74058	67774	78909	71377	79741	68900	80736	64925	70645	76057	65561	64893	73171	87808	93631	99793	100225
-1.6	118653	110673	138493	109505	137672	106164	142650	118597	125275	116995	117422	123465	120212	129160	131823	88762	83259	100787	84011	87763	92223	93788	94515	106449	83306	88766	79972	94629	96789	87089	69785	71253	74578	67687	79270	70810	79767	69227	80553	64789	71309	76253	65365	63648	72109	86882	93615	99571	100531
-1.51667	118785	109578	138230	111613	139038	110227	142249	119495	124112	115939	115358	121537	115180	132007	132438	88147	82700	101290	84314	87092	92185	93406	94282	107445	83747	88111	79614	94306	97089	87138	70014	70723	74454	67390	79222	70836	79762	68765	80477	65257	71667	76977	65481	64006	73290	87988	93372	99792	101000
-1.43333	116272	107814	138794	111718	138813	108790	140595	117685	127782	113514	115674	120829	116386	132314	134410	88078	83400	101579	84345	86999	91931	93384	93490	105158	83480	88253	79661	95418	96646	87279	70191	70704	74601	68255	79409	70391	79759	69393	80938	65439	71084	76092	65634	64576	73156	87378	92618	99520	101009
-1.35	117597	110989	138830	107439	138073	108986	140908	118305	123603	115876	116696	121591	114917	131470	129108	88742	82692	101118	84159	86807	92036	93082	94919	105897	83047	88127	79836	94943	95672	87956	69622	70921	74165	67854	78860	69860	79814	70020	80295	65720	71458	76455	66005	64544	72426	87263	92841	100218	101009
-1.26667	114875	112320	138274	107921	135924	108310	140038	117744	125177	115898	117751	124833	119391	130330	129737	89034	81499	101133	83843	86897	92215	93333	94803	106692	83560	88966	79675	94266	95633	87545	69796	71829	74704	67479	78781	70813	79652	69427	79942	64810	71588	75991	65481	64201	73005	87353	92547	99845	100409
-1.18333	114067	108989	139052	107831	139477	107205	139381	114128	125604	115348	115951	121842	115221	130729	133787	88679	82897	101123	84270	87603	90976	93091	94155	106425	82886	88798	80440	95063	95780	86777	69781	71161	74195	67917	79105	71073	79986	68943	80280	65762	70859	75845	65770	64625	72468	86442	92885	99105	100223
-1.1	114642	110538	139319	105659	135313	109366	142040	115005	123889	115827	114615	120351	115888	132537	129221	88345	81695	101033	83577	87111	91057	92874	94907	105886	83414	89370	79859	94882	95759	87647	69889	71922	74222	67956	79009	70939	79229	69470	80077	65546	71358	76258	65344	64619	73547	86969	92514	99759	99995
-1.01667	116204	111132	137831	108831	136086	106528	140230	115445	124746	115522	115140	120297	116679	130831	131087	88281	81165	100504	83654	86809	90621	93682	93810	104775	83044	88792	79527	94464	95927	87034	70012	70740	74237	68101	78951	70619	79796	69406	80337	64883	71366	75833	65608	64168	73208	87344	93500	99397	99809
-0.93333	113294	110103	137661	106724	137773	108654	137744	115744	122403	116831	113799	117864	116394	130988	132943	88013	80957	100486	83896	86592	91715	94134	93944	106692	82700	88764	80339	94651	95394	86610	69149	71119	74901	67992	79219	70434	79585	68562	80493	64863	71459	76481	65122	64450	73231	87178	93191	99023	100105
-0.85	117686	108731	138576	110978	137101	110761	140043	114749	123052	114020	115210	121303	119485	130876	131539	87418	81036	99875	84439	86879	91574	92686	93453	104132	83080	88182	79767	94884	95654	87120	69759	71113	73598	67631	79585	71005	80283	68659	80001	65010	71027	75876	66373	64318	73221	87017	91601	98710	100756
-0.76667	116099	111261	139576	106918	136427	109231	141052	118072	123914	114205	113140	120036	116900	129135	128929	87492	80451	101073	82983	85908	90073	93446	93593	106186	82752	89319	79960	94954	95429	87336	69163	71762	73904	67892	79222	70371	80053	68980	79574	65750	70356	75987	66534	64667	73453	87614	94120	99250	99824
-0.68333	115952	112506	137410	109008	137947	106744	140422	115320	123319	113927	114770	121499	114587	129281	132644	87752	80438	100708	83303	86165	90618	93100	93477	105560	83180	88561	80326	95003	95209	86953	70130	71293	74482	67898	78424	71579	79170	68810	80107	64679	70128	76336	65447	64195	72899	86476	92885	99659	99359
-0.6	112967	107589	136306	105177	137829	109586	141660	113685	125890	112235	113030	122829	115311	130377	127978	88084	80190	99362	82344	86202	90973	92139	94077	106180	82373	88016	79183	94415	95446	86383	69183	71506	74665	67886	79271	70920	80007	69034	80461	65779	71031	76551	65648	64697	73162	87215	92598	98781	100525
-0.51667	114669	107073	137777	106214	139250	108366	139013	112946	124977	112670	113154	120306	114085	128922	129967	88061	79804	99406	83148	86477	90355	93057	93434	105321	83328	87893	80984	94392	94453	87448	69965	71637	73972	67201	79114	71656	80196	68604	79927	65809	71238	75530	65981	64831	72313	87253	93783	98705	100467
-0.43333	117785	107437	137148	107287	138012	106688	141692	115310	124362	111219	116072	120374	114365	130595	130862	88175	79142	99912	83743	85874	89962	92571	93527	105563	82881	88653	79816	94082	94596	87025	69355	71005	74115	67241	78981	70556	79510	68952	79752	65346	71518	75254	66422	64503	72617	87637	92742	98040	100392
-0.35	115468	110714	136834	106691	136145	108526	141918	112019	121865	113534	111261	116845	118950	126848	134123	88022	80156	99591	83427	85393	89478	92136	93084	105728	82987	88483	79407	94959	94057	86884	70078	71244	74297	67993	79942	70888	80243	69416	80383	65569	70667	75943	66304	65005	72447	87185	93575	99284	98848
-0.26667	113645	111515	138970	107773	135562	108913	138319	112794	122735	111667	116325	119539	116055	127846	134000	87857	79426	99256	83241	85770	89527	91649	93798	106079	82998	88993	79388	94733	94367	87570	69516	71614	74792	67262	79460	70674	79322	68554	79506	65203	70377	76354	65834	64888	73160	86722	92385	99269	99419
-0.18333	116571	107227	138553	107696	138870	107976	135734	113989	123553	114529	113916	120327	114729	128759	129048	86802	78352	99305	82897	85364	89825	92030	93505	103987	82254	87941	79447	95147	93853	86719	69479	71647	74607	67503	79022	70357	79917	69274	79811	64714	70927	76469	66403	64966	72671	87283	92065	98880	98964
-0.1	113811	109400	133262	107194	137509	108549	137582	112962	120296	114303	114768	117369	115295	129028	130431	86443	78128	99165	83687	85841	88828	92439	93520	105361	81720	88424	79579	94332	94469	86758	69748	71401	73534	67634	79512	70739	79059	69010	79879	64964	70961	75359	65737	65025	72566	86101	92275	99147	99277
0
0.13333	102633	98502	118093	94930	119335	96456	120940	93985	96133	89687	94349	97224	95354	107651	110933	79163	72268	86846	75018	76839	79841	82038	85023	94086	75586	79976	70821	85293	84192	77665	62465	62156	65367	59983	69239	61167	69102	61369	68820	54684	60128	64722	57511	55047	62169	78375	79737	85137	82762
0.21667	101147	98277	118415	94189	121010	97370	122423	94955	96386	90026	94021	98459	95405	107480	109516	77778	71569	87750	75151	76459	79949	81617	85828	93285	75351	80142	71034	84987	84795	76781	62109	61632	65164	58824	68980	61166	69621	60714	68786	55403	60239	64885	58105	54801	62449	78622	80555	85249	82581
0.3	102393	98264	119104	95015	121260	96981	124036	95407	98300	90970	94473	98841	96638	106990	108276	78278	70054	87980	75701	76898	80107	82526	85061	94207	75286	80888	71582	86059	84672	76608	62292	61695	65355	59185	70025	62198	69639	60769	68665	55389	60939	65004	58212	55415	62856	78345	81610	85667	83215
0.38333	102822	98688	122276	96010	119834	97846	121203	95617	97846	92037	94319	98867	95704	108441	111918	79239	70727	87979	75687	77475	80258	83628	85767	94427	76006	80528	71244	85998	84865	77777	62779	62957	65942	59941	70537	62556	70524	61527	69600	55720	61003	65281	58605	55436	63585	78972	80640	86393	84012
0.46667	103144	98623	119867	95269	117825	97657	123438	96069	98034	93412	94758	99356	95631	107029	110100	79400	71673	88597	75872	77819	80543	86235	85802	94638	75847	80636	71659	86800	85115	78635	62953	64907	66501	60112	70587	63012	69938	61695	69906	56831	62079	66245	58925	56370	63718	79233	81829	85879	84168
0.55	103638	99104	120665	95546	120179	98023	120624	96110	98001	96703	95623	99679	96093	106601	108667	79223	71256	89389	75896	77409	81304	88220	86513	96309	76862	81203	72754	87354	85104	78743	62946	66432	66519	60942	71567	62659	70841	62439	70894	56566	61672	66296	59015	56279	64052	79679	82379	86511	83956
0.63333	105339	99005	120193	94916	119291	96978	127669	96307	97800	98516	95557	100029	96615	109099	109604	79475	71855	89236	75794	77261	81271	92299	86434	96342	77628	81406	72889	87972	85301	79140	62954	67923	66800	60368	71329	63001	71210	62170	71322	57737	62504	67322	59300	57012	63954	80615	82255	86418	86946
0.71667	104643	99480	119410	96058	121937	98419	124894	97487	99872	100736	96557	100172	96423	112147	111267	81004	71076	89840	76673	77695	82737	94938	87090	97194	77710	81003	73452	89003	86361	79270	64188	70393	67757	60630	73218	63224	70462	63083	72265	58059	63461	66826	59364	57249	64909	80991	82476	87871	87298
0.8	106540	99572	122127	96580	123851	97969	124504	97948	100643	104585	97606	100321	97247	110974	110364	81623	71636	90280	76656	78049	83177	97338	87215	99678	78515	81675	73583	88719	87253	80280	64139	72622	68596	60649	73646	63947	71453	63401	73319	58482	63215	67629	59788	56794	65698	81532	84813	88017	88026
0.88333	104493	99145	124590	96472	126089	98568	125120	98980	101895	106090	98725	101309	96904	112591	109984	81501	72649	91019	77212	79637	84302	99400	88483	100985	80321	81942	74308	90608	88271	80465	64950	75191	68593	61633	75342	64958	72722	65410	73651	59447	63402	68010	59753	57365	66022	82439	84632	88584	89477
0.96667	106952	99732	125831	97131	126299	99004	126326	100754	102471	105897	100278	102312	97710	112704	111925	83326	71535	91501	77322	78610	85095	102018	89741	102064	81000	82697	75680	91689	89265	81971	65384	76854	70328	62261	77021	65203	72491	65941	75200	60004	64019	68985	59563	58092	67326	82647	85621	88286	90352
1.05	110534	100334	127043	97315	127171	99644	130157	101388	103228	108371	102422	103707	97895	112075	116096	84582	71671	92395	76829	79177	85377	103045	91188	104108	82275	82508	76330	93136	90877	82963	67002	78435	70863	62221	78255	65864	73714	66894	76860	61088	63570	69775	60217	58859	68919	83148	86006	90941	91245
1.13333	107528	100829	124732	98469	125542	100475	132973	102531	104925	113951	104429	103739	98733	118490	115586	85853	71501	93615	77010	80014	86932	105488	91748	106529	83364	83241	77565	94490	91156	83254	67489	80167	72072	62792	80297	66881	74726	67382	76747	60740	64035	70671	60368	59738	70492	84813	87181	91057	93313
1.21667	113426	101980	128234	98941	127689	100410	132120	103952	107357	111731	105873	104422	99036	119360	118104	87032	71254	93950	77495	81210	89152	105761	94761	105234	85204	83589	78450	95954	92941	84107	68196	81753	72400	62884	81104	67858	75918	68195	79757	62397	64086	71235	60676	59761	71156	86140	88816	91575	95156
1.3	112829	102269	131029	99359	128607	101802	136763	104464	106974	111268	109814	105618	99673	116329	117809	88993	71568	95765	78472	81626	90743	105305	95360	107227	86943	85211	80197	97382	94390	85657	69015	82356	73693	63814	82177	68653	76515	70026	80071	63274	64239	72122	60574	60244	72977	87375	89502	93718	96471
1.38333	116300	103498	130602	99998	129099	103267	133154	105474	106884	116036	109861	107540	100369	121461	118878	89487	70710	97302	78855	81826	92259	105833	96554	110593	87518	86418	81010	98977	95710	87091	70082	82851	75344	64096	84627	69438	78163	70562	81700	65069	65094	73297	61412	60757	74541	89088	91010	93744	97414
1.46667	114276	104766	130742	101182	133024	103237	132709	106392	109881	117379	110323	110444	101116	121169	119243	90703	71247	97872	79928	82486	92886	109121	97911	111588	89806	87687	82024	101649	97440	88826	72035	83908	76149	64740	85426	70695	78776	71523	83560	65773	64797	74083	62406	62499	74530	89018	91196	95284	99078
1.55	115946	106035	134540	102882	134540	104416	139606	107637	111252	118899	114836	110371	102408	120249	120287	91992	71775	99565	79845	84435	93708	108054	100499	115350	90263	88647	83121	102709	98010	90927	72595	86289	77643	65989	87154	70909	79484	73434	84967	66343	64730	75260	63449	62921	76958	91278	94103	96425	100981
1.63333	117988	105666	132495	103310	133557	105226	138780	109286	111423	120455	116229	111641	102934	126893	124833	93467	70809	99680	80026	85618	95626	106516	101417	112976	92404	90004	84272	104367	99791	91222	73802	86509	78433	66822	87921	73068	81722	74186	85867	67594	65340	76121	63224	63669	77871	92237	94065	97359	101790
1.71667	118131	105154	133802	104045	133046	105946	139342	111462	113453	118303	113233	110241	104377	126793	124881	94139	71889	100734	81392	85787	95888	108818	103102	116272	94650	89747	86111	105609	100350	91608	75388	86327	79716	67702	89819	73937	82106	75135	86612	68454	65836	77055	63960	64074	78936	93339	95573	97991	103223
1.8	119836	108361	135388	104944	137508	107319	142182	110850	114224	122567	117818	114126	105732	126500	127492	95290	72712	101910	82012	86479	97130	111550	103763	118176	95760	90986	86619	106108	101733	92508	75330	87552	81353	68085	90904	75372	83898	76226	88715	70059	66106	77819	64577	65173	80883	94580	96875	99948	104578
1.88333	120644	109575	137929	104848	138720	104756	141603	113358	115207	121426	120287	114779	105594	128206	128541	96727	72120	104172	82619	87778	98443	110278	104261	118436	96900	93321	88007	106868	103344	94941	77168	87968	81890	68622	91116	75186	84258	77453	88732	70271	66407	78233	65090	66518	81387	95530	98415	101568	104961
1.96667	124966	107175	135655	104272	139637	107606	144557	114581	119093	118990	122876	114470	106848	130994	126951	97367	72536	104904	84260	89507	99182	111708	107304	119768	97839	94010	89580	108457	103973	96447	78580	88774	83025	70174	92330	77225	85251	78066	89483	70904	67801	79821	65718	67169	81571	96387	98573	102203	104870
2.05	122092	109955	139722	106305	139803	110428	143302	112981	118395	117419	123069	118533	106447	132274	131758	98438	73026	105167	83213	89747	100019	110309	108082	120681	98275	95438	90049	107564	104154	96932	79261	89778	84274	71484	93198	78010	86184	78674	90838	71899	68153	80313	66654	68127	83139	97518	99548	104251	105613
2.13333	126203	110138	141692	109766	141165	111889	146802	113167	119437	122579	122446	120136	106986	130623	133266	99121	72877	105068	84845	90552	101424	111699	108069	120773	100299	96479	91080	110482	105014	96873	79405	89158	85395	72650	94130	78891	87880	79006	91483	72205	69354	81564	67971	68500	83545	98839	100516	104019	106878
2.21667	126367	113836	143218	111072	140912	111945	144668	116529	123994	116946	124944	117579	111846	132508	132353	99274	75082	107649	85271	91024	101593	112685	109161	119846	100589	97616	91279	110952	105972	98318	80561	89625	85705	72810	94446	79555	88412	80460	91798	72599	69532	82136	68070	69480	83965	98318	102355	105310	105460
2.3	128330	115114	141879	111989	143737	111840	146744	119699	123787	120447	123319	117572	113243	129475	134327	100588	74660	105642	86181	93198	102188	111203	107832	121008	100848	98572	91767	110705	107591	99255	81215	90663	86618	74114	95693	80366	89125	80253	91873	73140	70092	82377	68817	70877	85581	99497	102810	104691	107011
2.38333	126596	114006	142374	109226	144245	113132	148120	118859	120806	121419	124553	119464	111299	135283	135453	100655	75260	106799	87149	93330	101900	113768	111252	121810	101580	99137	93374	113292	107165	99637	81871	90553	87055	74626	96078	80759	90386	80836	91912	73523	70546	83750	69167	70627	85641	100751	103347	106197	107442
2.46667	128322	112992	142744	110720	142819	113451	151152	120152	124196	122304	126726	123929	111340	135647	135690	101897	75337	109093	88283	94173	102943	110887	114278	121964	102812	100883	93083	115718	106493	100334	82679	91248	87133	75826	97384	82658	90600	82400	92572	74773	71168	84306	69102	71796	87000	101794	104056	106838	108494
2.55	127907	114306	147423	109557	143023	118293	151249	122887	121885	122452	128702	123253	114615	137195	136472	102539	76183	109953	88718	95198	101924	111765	110197	123956	102573	102106	94310	112895	105434	101027	82649	91412	88575	75207	96826	82608	92365	83104	93681	74496	72006	84661	71194	72629	87349	101364	104556	107174	106956
2.63333	129204	119964	147079	116063	151253	116244	149818	118796	125632	123454	124964	119999	115523	135189	136588	103075	76725	109277	89339	96231	103124	109273	113722	124137	103683	102352	94326	116945	106081	100865	83201	91367	88826	76261	97181	83807	92833	83305	93940	75029	73042	85722	71968	73511	87366	102370	105238	107397	107347
2.71667	127541	116903	143963	116807	145150	117712	149808	120570	124484	122620	126170	123814	115254	137640	139718	102889	77313	110675	89542	96261	104063	112493	112286	123453	104956	103203	94083	118540	107875	101697	84641	91711	89670	76435	97886	83979	93294	83713	94190	75004	73549	85112	72753	74559	88493	102223	105175	110132	108626
2.8	132556	117749	144617	114385	145825	117386	150125	123203	125690	123563	127876	125550	115124	138177	139821	102506	77464	108721	90449	97170	103485	112046	116561	126040	103713	103967	94936	117550	106387	101809	85293	92214	89954	78009	97908	84844	94195	83742	94912	75645	74001	86357	72355	74856	88936	103248	105234	108219	108339
2.88333	129023	120202	145754	113137	148566	117974	152040	123919	127742	122712	129307	124515	117088	139124	139818	103736	77911	110827	90986	98257	103095	115836	114229	128123	103895	104312	95217	116518	105389	102463	84699	92822	90794	78714	98182	84476	95522	84012	94579	77092	74877	86245	73570	75681	88365	103621	106452	108401	109271
2.96667	131954	117212	145544	117253	147699	120522	152067	122912	127025	124072	124983	126489	114664	137636	138775	102592	77491	111225	91635	98533	103375	110624	113804	124927	104315	105186	95755	114090	108194	100939	85131	92467	91240	79305	98259	85829	95393	84272	94811	76081	74313	87819	73948	75997	88972	104507	108113	108599	109694
3.05	129954	122362	142855	115528	147790	120712	151963	121762	128374	125983	127554	124137	120011	137252	143089	102560	79372	110041	92180	99174	103662	107899	115057	125481	104380	105043	96614	115464	107012	102335	85588	92321	91244	79640	99029	86114	95606	84336	95138	76466	76594	87668	74619	75918	89368	104177	106207	108445	112220
3.13333	129417	121684	148670	118141	146642	120989	152809	123168	126849	123093	127948	125167	118200	138337	139902	103964	78722	111301	92816	99030	104006	110531	114185	125241	106132	105969	96017	117509	106828	102487	86121	92437	91769	80492	98995	86638	95716	85839	94867	76205	77232	87853	75003	77360	89334	104924	107047	110953	109203
3.21667	131987	124325	147520	119695	149901	120871	154522	126858	126234	120719	127359	128031	117821	140521	140154	104255	80307	115890	94178	100291	103998	112003	114527	123138	104094	106908	95894	116974	106729	103677	86687	92850	92625	80695	99043	86883	95814	86582	96045	77125	78238	89459	75826	77176	90580	104754	111185	108957	107803
3.3	131623	120869	147618	116366	148660	121563	151202	124196	126386	121179	128520	124008	121638	139182	141224	104911	80726	115466	93416	99974	104308	112634	113700	123855	105350	107668	96263	115450	106549	102988	86478	93660	92112	80832	98863	88037	96419	85940	95464	76581	77494	88442	75637	77497	89521	104076	108432	112593	107968
3.38333	131176	125724	147278	117946	147425	120774	150321	123547	127253	122732	128208	129723	121902	138596	144763	104045	80519	111805	94284	101208	104120	112097	118643	125519	105999	108620	96751	120978	107333	102865	87196	94089	92358	81955	99865	87427	97209	85832	95513	77503	78917	89186	77336	78821	90547	104810	107803	107399	108112
3.46667	129972	123775	144192	121081	147690	123514	151564	122017	127360	124821	131165	127776	116724	137389	144000	104926	81500	113045	93935	101089	104013	114100	115912	121327	106583	107290	96204	115546	106339	102795	87971	93110	93275	82231	99382	87519	96368	85784	95923	77210	79545	89496	76900	78604	91111	105478	109218	109515	108285
3.55	132660	125169	146960	120556	150003	121852	152234	123569	124825	120348	131732	127249	119081	140597	144116	104178	82235	114096	95576	101152	104437	109924	115048	124247	106118	105843	96415	118200	108285	103203	87604	93614	93499	82436	99831	88333	97235	85836	95782	78237	80087	90224	77349	79697	91162	106039	109151	112499	109655
3.63333	132427	123302	145677	119954	149071	123672	153524	123030	127940	123893	127963	126317	120535	141263	141232	104960	82538	114212	95535	102038	103954	113780	115531	125209	105205	109717	96729	116793	105333	102904	88440	94019	93716	83358	100297	88191	97947	86678	96098	77932	81005	90542	77341	79976	91057	105242	110041	113919	110921
3.71667	128221	124454	145878	121416	148728	122021	152785	123864	127728	125061	127707	124826	121804	140728	143344	105398	82336	114124	95087	101298	104225	113052	115835	125489	107071	109513	95949	118383	107323	104017	88463	93281	93703	83453	99750	88924	97530	86916	96836	77338	81358	90106	78783	79779	91163	105513	109777	113119	110086
3.8	131656	122319	150795	121860	148421	122825	153328	122412	126619	122624	128886	126086	122434	141100	145050	106253	82724	112337	95546	102587	103045	111292	116597	125599	105705	108420	96322	118799	105707	103664	87835	93487	93749	83707	99885	88919	98215	86952	96132	78444	81408	90795	78737	80142	90697	105349	106787	112354	110954
3.88333	132300	128446	145003	121156	151025	126754	151862	124483	127907	123305	128423	127978	122911	139553	141267	105210	83303	116816	96743	102433	102906	111176	115845	124433	106340	108233	96450	119865	106438	103070	88434	94457	94037	84242	100818	89350	97071	87719	96918	76952	82101	90822	79091	80953	91283	105873	110125	110969	109188
3.96667	130526	127754	144685	120659	145862	122903	156881	124661	129202	121252	132021	125833	123587	141944	143122	105414	82663	113056	96012	101578	103082	109914	116031	122222	106555	109054	96890	118967	106932	102981	88423	93661	94530	84778	100178	88821	98205	87664	96495	78753	82919	90344	79130	81142	91730	105778	107687	111828	109669
4.05	130727	124940	150447	118827	149041	124477	154295	124547	127551	121441	129061	126562	124185	141292	142854	104460	83644	110620	96495	103174	103437	111658	117176	123636	107978	111041	96896	119419	105667	103925	88972	94367	94071	84261	100795	88676	98586	87912	96779	78618	83662	89881	79783	81881	91963	105484	108093	113509	109597
4.13333	135058	126825	146131	121296	144502	126675	157577	123008	130677	123557	129153	128361	124550	139112	143666	104699	83919	114098	97137	102704	102463	111743	116803	125326	105520	109732	96665	120378	106775	103794	88593	93716	94345	85030	100726	89280	98690	87674	96503	78805	83493	90898	79657	82186	92352	105849	106815	113714	109444
4.21667	133805	127071	149004	119709	146434	123742	152067	122241	127710	119467	129324	127197	124758	139667	144071	105702	84329	111358	97501	102997	103223	113169	115506	122865	105795	111588	96855	119435	105252	103736	89217	94857	94485	84907	101084	89823	98624	87703	96272	78315	83512	90865	80157	82237	91503	106330	110758	110059	107935
4.3	131767	124799	150744	121472	147670	126670	152317	123797	129400	121484	130952	127360	123789	139563	140472	104944	84859	114375	97342	103283	103869	110250	118203	126687	104871	110176	96193	120881	106430	103002	89230	94016	94296	84453	101622	90663	99092	87634	96060	79145	84617	91177	80046	82025	92145	104508	109640	112723	106242
4.38333	131292	124068	146174	123654	150655	126035	152986	125720	128655	125487	129934	124320	124591	136855	141815	105151	84170	113744	97381	104027	102971	108898	115914	124524	105554	111087	96789	120134	106441	102596	88869	94186	94810	85053	101512	89655	99899	87545	96328	78560	85456	90928	80439	81945	91731	106017	108867	115723	112973
4.46667	131398	127885	147007	121389	146962	125894	152488	124752	127183	125478	127321	127591	127178	141099	144786	105326	84854	112237	97991	103401	101877	109678	115341	122290	105769	111874	97076	121547	105372	103815	88846	94014	94390	85799	100541	90045	98207	87990	95443	78639	85505	90906	80688	82646	92761	105799	110613	113992	108655
4.55	128718	125012	148163	124536	148674	126894	153997	122327	125686	121912	128321	127678	126557	139391	144815	105967	83674	114208	97595	103623	102296	110225	117829	125652	106055	109046	96132	118933	105528	103261	89436	94314	95364	86028	102028	90118	99401	88652	95658	78678	86107	91901	80658	82606	92490	108154	109284	111874	110638
4.63333	132364	127453	141336	121611	145833	128536	152759	124016	127701	121467	131867	130205	125061	140160	143056	105207	84938	112806	98341	103984	102624	112293	117393	125557	105358	111850	97005	120701	105623	103601	89435	94235	95191	86015	100685	90056	100321	87636	96554	79086	86189	91874	81280	83354	92256	106841	110613	114852	107715
4.71667	131862	125808	150844	123613	148378	127691	153913	120298	126818	123029	130593	126056	124210	141036	143429	105533	84908	114904	99021	104221	101609	111472	119022	122534	105758	111396	96610	121334	105040	103690	89739	94132	94945	86662	101305	90405	100020	88420	97544	78638	86617	91743	81384	82758	92119	106996	109141	112629	109717
4.8	133041	127612	145469	125029	144810	125681	155425	125637	128247	121630	128806	126498	124636	137533	141362	104515	85139	112481	99000	103752	101102	111819	119020	123465	105684	110536	96862	121923	105525	103501	89487	93778	95514	86425	101324	90598	100086	89115	97180	78696	87891	92052	82632	83485	92759	105894	108271	113128	107235
4.88333	132288	123290	146914	125867	150165	126137	152624	126365	127894	121875	127940	126413	126397	140088	143893	104799	84031	111347	98734	103280	101235	112193	117884	123371	105752	111322	96471	117960	105244	103049	89571	94296	95299	86987	101209	90883	99715	88652	96014	79786	87641	92808	81674	82735	92388	107816	114418	114910	107615
4.96667	134322	126151	146688	122984	148765	124584	153887	118664	129782	123241	131605	125407	126596	136962	144760	105653	84876	110868	98701	104434	100813	108548	118574	123257	104644	108954	96654	120030	104484	103248	90306	94050	94769	87138	100985	90182	100186	88546	96413	78478	87793	91917	82360	83667	92788	107779	108319	113879	110313
5.05	129627	127572	145612	121497	150297	127351	153172	124899	129346	125341	127222	127124	126252	140160	147869	106259	86011	112759	98165	104383	100099	109731	114880	122446	106226	112157	96982	119388	104185	102577	89202	94124	94883	86868	101171	90453	99653	88552	96081	79025	87429	91507	82345	83804	91046	106610	108707	110690	107199
5.13333	130450	129435	149258	120043	149829	126202	153360	126367	126046	122883	130947	126488	124504	139649	146836	105521	85075	114392	98627	105116	100634	108573	117333	122925	106294	112930	96523	119206	104668	102133	89443	93936	95505	86474	101284	89590	100156	87264	95950	79497	88167	91871	82567	83517	92305	105972	109401	113975	105134
5.21667	129208	126209	148247	123556	150628	125297	150405	124546	128741	121230	127852	127367	125589	139943	145146	104989	85051	115581	99378	104241	100508	107596	115147	120940	104742	111868	96679	119999	104599	103116	89722	94161	94915	86818	101822	90826	100475	88443	96237	78876	87678	92002	82526	84115	91310	106700	110228	113857	109891
5.3	128944	128323	145276	122770	150142	127420	151120	125578	128966	119800	129644	121631	125912	139047	142206	104537	84698	114934	99555	104287	100963	110369	117405	120633	104966	110778	96294	119906	104346	102940	89874	94407	94893	87193	102898	91717	99956	88998	96395	79646	87789	92403	82970	84611	92604	105878	109709	114464	109008
5.38333	131855	126673	144844	124024	148320	126466	151154	122209	128831	120025	128548	127111	124437	139363	143902	105010	85440	113575	99648	104303	99987	106862	116973	123540	105015	112449	96102	120700	103516	102807	90097	94221	95135	86713	102330	90559	100842	87817	96624	79501	88501	93294	82858	84072	92744	106427	109803	115806	106323
5.46667	132347	128546	146971	124639	150562	125236	150854	124061	127881	120349	126823	128720	127372	137851	142768	105713	85607	113905	99722	103548	100221	110843	118481	122251	105617	114602	96576	119606	103517	102842	89519	94497	95060	87398	102224	90910	100769	88300	95529	78924	89494	92567	82996	84368	92290	105187	111024	114242	105709
5.55	132822	128956	149530	123005	147263	126386	151807	126455	129003	119863	128781	128400	124680	139541	144695	104649	84359	114528	99166	104227	99029	106668	119388	123852	104486	114585	96089	118437	103404	103327	89822	94017	95490	87146	101578	91222	101428	88447	96173	79536	89087	92160	83692	83813	91689	104590	110540	110625	107418
5.63333	131930	125472	148473	122654	146819	129042	154864	123104	128514	121149	128781	126457	127127	140562	141852	104500	84645	112637	99334	103176	99569	107266	115142	122128	105010	107287	95986	121407	103286	102815	89682	94306	95437	87524	101887	90613	100097	88642	96497	79122	89854	91921	83522	85520	91807	105412	109584	116746	106465
5.71667	130534	125938	143639	122036	146192	129979	151753	120513	124585	121501	128810	123891	124112	140114	144154	104963	84559	113011	100034	103555	99520	110402	120828	120127	105433	112900	95628	122165	103143	102203	89929	94840	95697	87492	102607	91717	100124	88617	95104	78684	90336	93009	83565	85364	92113	106350	110507	114569	107286
5.8	133389	128221	149037	122611	145369	127245	153101	125313	128817	119001	125611	127750	126814	140661	143384	103705	84427	114380	99792	103546	98393	105541	119226	122426	105279	112953	96098	121330	103614	102049	90078	94307	95667	88058	102117	90926	100610	88693	96040	79088	89643	93971	83759	84795	93120	108305	110175	113301	107457
5.88333	129942	124808	147870	122170	147060	127088	150631	121594	127417	119013	127019	124483	127680	138880	146254	104511	84086	114371	100235	104575	98331	109205	118777	122447	103763	110738	95279	120327	102471	102988	89948	95091	95658	87773	101282	91514	99721	88295	96816	78829	90639	93301	83566	85629	91816	105093	108248	113201	109216
5.96667	129760	125927	146250	123145	147740	128176	153458	123874	125660	119408	127346	125494	125669	138343	142238	105154	84183	112363	99510	103997	98475	109843	117306	122599	104284	110713	96548	120680	102285	102734	90010	93527	96171	88616	100655	91102	100585	89108	96311	79537	90377	93012	83271	85518	92928	107901	110895	112347	107139
6.05	131451	125966	147236	123368	144795	126438	148943	123687	126334	121613	127799	126686	125583	140416	143084	103613	84241	111461	99886	104162	97497	106730	118387	120386	104396	110945	95364	118878	101654	103453	89575	93981	96395	87586	101469	91501	101024	88818	96493	78853	90020	93476	84563	85571	92214	105304	110043	111157	106969
6.13333	128477	125202	147874	120808	145210	127527	153391	123755	128029	118489	127254	124873	126942	138846	143763	105150	83860	111030	99117	104022	97098	107656	117065	121155	104799	112504	96207	120710	101824	102705	89386	93829	95492	87299	101776	91647	100303	88498	95842	78478	90415	93511	84183	85258	91119	105696	106869	112681	108295
6.21667	131704	125886	143176	123788	146672	127196	149989	119971	130310	120034	126209	128007	124733	135477	139720	104261	83181	112360	100163	103980	98416	108492	118090	120885	105049	109964	94887	121647	101158	102441	90076	93817	95634	87632	100873	91340	100485	88947	96915	78466	90461	94039	83711	85399	92297	106127	112030	113381	106360
6.3	130789	128816	145466	122926	143985	128058	151924	123166	127939	120663	125164	128550	125417	136146	139857	104961	83580	111170	99942	104387	97614	108002	115605	118900	104703	112302	95484	120400	101411	101922	89389	94145	95574	88174	101290	90981	100459	88571	96520	78607	90138	93400	84851	84993	92312	105580	109321	114128	106312
6.38333	130494	128983	146197	121535	148375	126190	153908	120701	127947	119624	126345	125529	127416	136323	141311	105604	83065	113009	100587	104187	96455	107619	117215	122055	104408	110703	95389	121695	100543	101779	89634	93228	95251	87670	101553	91241	100604	89434	95825	79221	91000	93115	84072	85716	92995	106440	106578	112439	109282
6.46667	128184	131915	146471	121723	146311	127691	152623	119339	127329	119245	125947	127794	122054	134667	140690	104173	83256	112579	100134	103440	96487	107337	116807	121741	105177	113302	95321	122676	100818	101954	90318	93882	95412	88115	101347	91209	99959	89259	95895	78551	89589	93420	83936	85266	92415	105241	109424	112946	107248
6.55	129579	127960	146511	120977	146840	124763	150713	124007	128666	118447	128993	123137	126592	138733	143029	103923	83756	111985	99712	105093	95725	107549	117048	120805	104587	112745	95458	120672	100542	102115	89681	93918	96429	87678	102041	91488	99896	89062	96145	79033	90176	93806	84367	85544	92614	107397	108372	111513	108891
6.63333	126268	127593	144843	124705	150190	129598	151800	119841	125535	122129	127053	124163	126796	137195	141395	103482	83553	112911	99858	102556	97197	108196	117023	119138	103813	113365	95024	119789	100080	101537	90302	93918	95250	87407	101773	90958	99786	88066	95744	78919	90579	93646	84735	85440	92260	106358	108269	113859	105961
6.71667	127046	126255	144932	120383	146333	126963	153205	122691	127185	116830	128956	125007	123417	137474	144798	103590	83446	108086	99480	104289	95912	108475	116274	118363	105029	110188	95004	117834	100291	101351	89938	94608	96078	88191	101030	91154	99630	88412	96185	78936	90835	93813	84831	85118	92302	106136	107695	116073	106527
6.8	128447	126058	143981	120403	146264	128633	146477	123562	122392	119731	127221	124608	123656	133058	141402	103872	83458	111409	99296	103506	95938	107837	114403	118380	103252	111415	94684	118003	99693	102577	88866	93832	95636	87540	102269	90674	100096	88841	95824	79096	91194	93865	84701	85785	92331	105620	106008	115110	107705
6.88333	128395	124643	141892	121565	147125	125829	150040	120796	127934	118040	122618	123782	124304	133920	141326	103086	82921	110062	99414	103308	95712	107569	114655	118882	103107	111615	94913	120679	98601	101439	89308	94362	95802	87850	101759	90809	100958	88760	95616	79187	91431	92941	85048	86122	92090	105077	110039	114128	107506
6.96667	130769	128220	144445	121298	144691	131035	151167	119935	122015	121734	124156	122695	126232	133998	136621	103576	83216	111053	100049	103867	95682	105697	113924	116743	103564	111219	94353	119350	99449	101235	89598	93788	95535	88014	101915	90767	99826	89088	95230	79330	91084	93493	85203	86226	91678	106241	108963	115460	106962
7.05	126553	128133	144861	122818	145135	125539	148875	121185	127893	117154	126241	122132	125206	134811	141153	103633	82765	110751	99544	104039	95022	107102	115869	118280	103326	113999	94280	118687	99526	101375	89368	93664	96187	87653	100855	90522	100043	89091	96046	79274	91654	93386	84583	86209	91849	104069	106006	114258	105187
7.13333	127552	123084	142636	121864	145260	123617	151421	118566	125960	116950	124454	122716	123286	135131	140330	103324	81642	111126	99274	103783	94705	106248	116792	117967	102809	112262	95027	118127	98064	101311	89132	93424	96110	88227	101300	90815	99678	89138	96623	78708	91552	92708	84617	85947	91973	104724	107802	114925	107248
7.21667	128148	124483	142881	118932	144380	128542	147581	121258	124989	117657	124494	122499	125059	137387	140151	102566	82636	112715	99857	102609	94213	107190	115768	117615	102259	110855	94868	117955	98273	100554	89121	94159	95852	88061	101318	90805	99850	88802	95431	79040	91201	93174	85408	86453	92041	104525	109070	111490	105349
7.3	129815	123094	144894	122465	147084	124954	150237	120082	127477	114179	125596	122810	125260	133954	141379	103364	82967	109010	100136	103700	93624	105590	119373	119362	102796	114538	94546	118581	98332	100805	89520	93148	94904	87640	101163	90618	99386	88686	95133	78608	90310	93474	85070	85881	92176	105011	110508	114309	106622
7.38333	127133	128016	144954	120231	144492	126520	147528	120378	127136	115978	122810	123429	122862	136719	141888	102554	81297	109966	99343	103595	93932	105367	115368	117799	103023	112813	93605	118212	97029	101207	88819	93518	95128	88215	101676	91418	100568	88688	96273	79435	90172	92912	85349	86269	91812	105205	108530	110093	105839
7.46667	127124	127360	144403	121288	145955	129432	149803	122794	128889	119466	124505	125016	124702	138740	141355	102326	82520	112194	99511	104039	93886	106174	115015	119912	101873	112366	94099	117869	98201	100787	89408	93772	96067	88503	101551	90627	100652	88869	95464	78655	91585	94310	85378	85380	91546	104908	108973	112090	106089
7.55	127505	126036	144648	121099	144969	125727	147044	117673	126338	117326	125389	123446	125819	134494	142747	102451	81408	111675	99960	103565	94142	105493	115246	119384	102696	112499	94499	118486	96930	101276	88342	93757	94878	88589	101766	90571	99581	88494	94995	78792	91442	93174	85576	86438	91910	105505	108162	113736	105334
7.63333	128025	127135	143571	120990	144648	126327	151001	120210	124266	115584	123610	121143	125555	136453	140116	102484	80571	110060	99552	103409	93021	106174	115367	119393	101759	110555	93773	116286	96294	101006	89046	94133	95144	87669	102124	90535	99910	89009	95919	78892	91221	93862	85639	86070	92255	105831	110045	112172	104943
7.71667	124674	121151	143231	118364	145950	126822	151064	119548	125102	115028	124459	119663	125203	132477	142094	102048	81499	113795	99630	103221	92895	105881	116916	116021	101470	109531	94750	121238	96666	100272	89360	92669	95061	88081	100995	90666	99972	88952	96178	78499	91664	93262	85373	86195	91452	104518	106998	111828	105292
7.8	125210	126035	142959	119887	143957	128554	150241	122927	125407	115022	119215	122700	127823	134784	139442	101989	81039	110994	99404	102686	92230	106077	116547	116855	101412	110570	94353	121274	95815	100687	89110	93539	94998	87936	100796	91350	99840	88238	95554	79136	91361	92953	85404	87255	92082	104802	108075	113535	104713
7.88333	125008	124584	143091	120546	148161	125751	147270	117446	123336	117252	126057	122865	124198	134889	139451	101163	80756	110580	99685	102974	92782	105409	116286	116643	101853	110944	93422	117615	96096	99662	88552	92578	95563	88351	100866	89893	99692	88248	96551	78968	91194	93523	85488	85951	90813	104867	109050	114579	106589
7.96667	126920	124676	142254	121201	144606	124942	150049	118548	128401	114702	122711	125304	123726	134093	142364	101722	80018	107953	98905	102423	92204	106531	115834	117681	100755	111318	94016	118196	96535	100395	89276	92966	95048	88324	101032	90741	99317	88715	95143	78371	91768	93837	85781	86262	91819	104194	105584	112032	105495
8.05	127572	124740	144012	123347	145573	125471	145649	118849	127167	116407	122686	122203	125086	133573	137937	101928	79914	110891	98579	102874	91191	104207	113040	118448	101668	111189	93575	120173	95844	100099	88749	92345	95006	88770	101368	90228	99342	88000	96062	79275	91820	93676	85893	85924	91647	104551	108102	113224	104635
8.13333	127840	126619	142638	124024	143976	126482	149416	118963	122734	116995	121476	121592	125760	137138	138451	101913	79919	109431	98690	103691	90081	106252	118408	119864	101068	109113	93774	119332	95381	99422	89437	92866	94193	87331	101354	91146	99316	88114	95738	78489	91079	93733	86374	85201	90437	104877	105899	112861	105539
8.21667	124541	124606	142428	122518	145015	125754	148399	118513	124349	117232	125903	124059	119854	133453	138793	101885	79176	106396	99088	102250	90685	105254	113820	118289	100413	113665	94022	115597	95701	99488	88772	92826	94768	87629	99819	90328	100031	88186	94553	77895	91468	93652	85863	85723	90902	104824	108456	113762	105733
8.3	124959	122670	145303	122525	144144	121863	151462	117553	127116	114458	124268	120795	122283	130700	137144	102426	79427	109501	99279	102331	90404	104895	113282	119449	100546	109246	92913	120752	93820	99574	89188	92144	94544	88112	100857	90574	99039	88128	93953	78703	90954	93606	86421	85396	91396	104623	107749	111831	103340
8.38333	126070	125211	142052	119778	145899	127362	146827	119024	122681	115543	123937	121790	124055	131660	137481	100906	79021	108187	99396	102171	90738	103726	114894	116410	100712	108430	93974	116477	93661	99387	88304	92354	95824	87522	101040	91028	100036	87707	95048	78711	92002	94362	86002	85799	90595	104638	109386	113473	103592
8.46667	122381	126356	145290	119240	146560	124044	146223	118594	123969	115598	121165	121647	123820	133587	137779	101760	79136	106224	98493	101900	89367	103867	113349	112975	100755	111873	93870	118644	94519	100408	89184	92917	95139	88163	101638	90120	98958	88327	94239	78380	91746	93155	85888	86066	91442	103532	106201	111695	104317
8.55	127777	122322	145407	120042	142284	125101	147087	117784	124796	115583	122349	122067	121575	133382	139817	101435	78410	107092	98829	102662	89535	103517	114701	115604	100543	109813	93233	118147	93961	98578	89276	92528	94810	87597	100893	89869	98885	88222	94330	78136	91847	93564	86014	86567	91358	103555	108553	115294	103883
8.63333	124003	124095	144169	121072	141811	123547	147315	117287	121601	117724	118353	119883	122524	133598	137463	100681	77724	108022	98704	101093	89561	103785	114036	113464	99382	110726	93794	118998	93794	99461	88342	92100	94580	87806	101036	90300	99515	87876	94631	78293	91924	93757	86083	86207	91226	103786	109370	111995	103081
8.71667	125030	123030	139868	122924	146748	124034	148797	117768	124938	114456	120610	119348	122712	131694	135148	100461	77786	109673	97704	101111	88714	103668	112725	114861	99675	109142	92796	119587	93597	99275	88674	92192	95113	88007	101272	90917	99638	88144	95574	78135	91449	93427	85887	86679	91179	103403	106123	115302	102435
8.8	125465	123551	142647	120361	144266	124847	145547	117592	124839	117996	120192	120868	121584	135646	138403	100089	77448	107158	99075	101262	88923	103524	113950	115030	98902	111316	93059	115836	93157	98574	88560	92305	94718	87477	100849	89427	99008	88194	94444	78339	91623	93994	86445	86641	91874	103630	107134	112503	101299
8.88333	123932	123083	136495	118261	146497	124460	149014	115534	122790	116318	121958	122515	124393	130066	141632	100314	76989	107064	98802	101826	87722	103621	113809	112045	99253	110674	92722	116195	92679	99339	87368	92653	94621	87720	100265	89888	99063	87463	94014	77995	91347	92972	85758	86263	92087	104393	105177	112389	101816
8.96667	124462	123914	141471	118088	143029	124558	146333	114746	121325	115072	122549	120677	119517	130696	136950	101022	76961	109613	98287	102509	88021	105059	115708	114272	98199	107614	92502	119217	92567	98989	88946	92157	94683	87621	101227	89583	98495	88130	95072	78051	92255	93083	85980	85642	91918	104238	110323	111500	101572
9.05	122699	122643	140276	120299	140365	123542	145295	114474	122951	115973	121501	119047	120699	127184	136437	100242	77008	106184	98513	101859	87681	102572	113533	112371	98734	111485	93829	115764	91915	99216	87633	91891	94528	87605	100694	89974	99224	88234	93987	77516	91057	93342	85467	86158	91718	102930	107316	114664	101378
9.13333	125143	123033	140345	119544	143642	125083	146566	117182	123380	116146	121740	120955	124003	131764	134955	100505	76768	107584	97745	101372	87859	102461	113384	111202	98929	107121	92391	115537	92388	99217	87812	92458	94024	87426	100968	89850	98430	87512	94964	76913	91039	93611	86042	85695	91518	103857	105091	113620	100251
9.21667	124765	120852	138854	118478	143252	122648	148370	114825	123695	112462	124499	120987	119937	134095	136628	100076	76664	109350	98222	101904	87391	103185	113032	114392	98298	108430	92020	116009	91671	98369	88389	92458	94035	87841	100910	89738	98566	86898	93724	77917	90915	92649	86277	86068	90931	103536	108803	113960	99424
9.3								116697	122769	114363	124799	121090	127093	129387	137555	100445	76041	105462	97555	100679	86770	102340	112957	112276	99199	109132	92543	118074	92033	98351	88057	91674	94669	87570	100636	89219	98950	87207	93814	77339	91167	93316	85774	86200	91931	103156	104926	111959	99905
9.38333								118388	120697	112036	122100	121435	120542	131394	139130	100056	75630	106351	98519	101443	86782	101714	114278	114308	97233	108292	91704	117983	91942	98098	88273	91542	93936	87240	100116	89654	98890	87584	93921	77923	91626	93544	86044	86304	90467	103198	106689	109335	99304
9.46667								114819	122544	113390	119235	119884	122525	130882	138464	99750	75851	106560	97535	101571	86003	101905	111736	115782	97987	110762	92523	120264	91026	98556	87657	92125	93854	87698	100469	89713	98275	87478	93833	77703	91104	93089	85283	85384	90918	101953	108244	111836	100254
9.55								117196	123203	113097	121038	121281	121909	133599	133382	99527	75504	106412	98337	101063	86408	101998	114515	111583	97763	110710	92554	117230	91018	98536	87790	91722	94134	87297	100393	89802	97911	88017	93303	77804	90850	93821	86452	86017	91590	103201	107808	112563	101008
9.63333								116065	122886	113792	122533	120426	121628	129172	139177	99628	75911	105851	98372	100649	85878	101331	114426	111151	97871	111536	92029	118595	90515	97817	87319	91704	94097	86880	99523	89989	98041	87632	94358	77853	91345	94001	85829	86396	90795	102495	107468	112805	99994
9.71667								115736	123687	113641	121522	117684	120688	131924	137898	99086	75879	107000	97968	100410	85800	101929	112161	112153	97621	105370	91410	119636	90697	97541	88166	92178	93634	87563	100617	89403	98046	87749	94210	78127	91202	94242	86531	85854	90609	102962	105709	112324	98409
9.8								117330	122859	113651	117998	120710	121973	132251	136511	99631	75562	106705	96704	100656	85670	100971	113759	115143	97638	106446	92414	117322	90855	97439	87904	91273	93593	86516	100170	89704	97359	88215	93505	78455	92412	92828	85304	85339	90919	102274	106664	116122	98744
9.88333								117499	120807	112252	119862	118616	123275	133050	136736	98513	74555	105231	97505	101104	84822	100696	111580	114073	96999	109902	91533	115886	89334	97387	87545	91617	93642	86295	100559	89266	97182	87169	94121	77237	90722	92780	86198	85189	90823	102384	106131	111981	97464
9.96667								114601	122781	111407	119603	118033	121332	129407	137628	98766	75165	105864	97263	100295	84707	100947	112855	114378	97152	106676	91890	116134	88725	97715	87514	90422	93962	87101	99987	88857	97550	87550	93893	77558	90443	92735	86102	85805	90846	102408	106983	109950	99395
10.05								116342	120221	109602	118254	119085	122714	130753	137876	98967	74194	106589	97083	100442	84336	100309	111858	113071	96726	108538	91682	115758	88894	98031	87844	90966	93603	87322	100422	89031	97075	87883	92917	77836	89775	93313	85674	85639	90979	101755	106865	111513	98810
10.1333								116570	122059	111919	120036	117589	121480	129847	131569	98905	74407	105219	97497	99853	84241	100249	112642	111635	97324	109593	90892	114254	88804	96979	87015	91475	93568	86694	100577	89620	97786	87096	93058	77223	90387	93362	85930	86139	89886	102661	106036	112233	97511
10.2167								114829	119953	112961	119093	120366	124805	130112	134910	99353	73609	105867	98219	99741	83476	100323	113573	112142	96784	107707	91626	114850	88600	96688	86267	91342	93343	87212	100104	89747	97240	87088	92876	77396	90554	93185	85265	85496	90704	102484	106346	109402	95753
10.3								113660	120485	114223	118951	120188	120183	127602	135708	98588	74085	105538	97868	99795	84006	99931	112331	112459	95738	107061	92039	117278	88185	97267	87164	91481	93591	86724	99989	89185	97203	87649	93621	77308	91078	92674	86306	85407	90142	102027	106541	112666	95999
10.3833								115559	124745	110409	117301	118278	118028	127859	135951	98634	74283	104275	96942	100181	83838	100004	111760	108532	95980	107240	91746	116236	89131	97581	86490	90815	92567	87116	100348	88155	97343	87459	92332	77593	90191	93539	86453	85884	90412	101995	105930	111779	96217
10.4667								116026	118195	111624	114866	117522	118094	133177	136444	97697	73104	105455	97546	99461	82938	98898	112593	111862	95316	108561	91804	115711	88164	96845	87456	91107	94110	86737	100159	89103	96851	86611	92661	77035	89918	92920	85417	86168	90522	101570	106104	110642	95696
10.55								113707	120315	111812	116109	118448	119123	128721	134292	97869	72831	105447	97794	99701	83337	99919	109456	111598	95157	105362	91372	114653	87354	96773	87502	90789	93053	87039	100191	88142	96473	87483	93011	77623	91158	93027	85524	85595	91031	101082	107868	111377	96817
10.6333								114945	121513	113493	116065	117337	116586	130235	135762	97627	72325	103980	96712	99506	83049	99144	110973	112988	94935	106608	91522	115849	87504	96693	86592	90764	92515	86520	99725	88427	96448	88322	92424	77022	90263	93349	85002	86621	90584	100962	105676	112689	97227
10.7167								113571	122073	110899	117290	114287	118638	128292	135247	97457	72806	105295	97218	99390	82632	98737	114349	113096	95408	108360	90605	113543	86492	97281	86685	90649	93384	87356	99790	88582	96374	86538	91207	77816	90736	92407	86024	85195	89313	101930	104331	109433	96272
10.8								113438	119755	112245	118048	116502	118791	134229	133537	97303	72883	104195	96530	99422	82345	97808	112059	112282	94550	107858	90966	115110	86582	96280	86231	90575	93118	86455	99412	88496	97192	87848	91379	76477	90498	92293	85630	85737	90343	101061	106449	107915	96568
10.8833								113448	120914	111852	118197	115342	119343	128938	134938	96968	71833	104225	96785	98439	81670	97673	112521	108091	93978	106438	90154	114368	86137	96441	86695	89949	93408	85890	99664	88420	97109	87027	91593	76829	90356	92639	85959	85566	89926	101341	104745	109618	97589
10.9667								113048	120383	108030	119598	117484	116912	130787	135080	97723	72234	103728	96843	99328	82193	97793	109443	107346	95317	104790	90466	112761	86241	95763	87234	90275	92914	86138	99036	88944	97164	86870	92807	77952	90417	92832	85604	86728	89625	101222	105860	110710	97553
11.05								115063	120712	109001	118150	116206	118538	129022	134725	96886	71575	104324	96617	99150	81199	97681	110154	107943	94949	107294	89536	113138	85689	95494	86414	89563	93434	86216	99908	88243	95962	86695	91970	77428	90342	93084	84808	85118	90228	101097	106170	107542	97027
11.1333								113168	120640	111235	116668	117389	116481	126707	132177	97134	71661	104265	96822	98737	81591	97811	111166	110908	93827	109142	90220	115911	84942	96068	85930	90301	92727	86470	98695	88203	95644	87294	92384	77330	89615	92436	85511	86330	90772	100587	106066	110981	98248
11.2167								114350	122079	112285	117615	116757	119815	126276	133122	96524	70999	103840	96568	98196	80953	97909	105855	108068	94234	107074	90153	113662	84981	95729	86891	90524	93209	86720	99509	87447	97121	86702	91863	76980	90214	92106	84918	85895	89985	100755	105937	109583	95405
11.3								115879	119785	110961	116471	118701	120585	131486	132874	96830	71624	103300	95722	99297	80952	97209	107067	110637	93430	107318	89670	113650	84769	95298	86344	90600	93611	86339	99300	87883	96582	87267	93127	76680	89413	92922	85830	85724	89756	100023	104578	108438	97496
11.3833								116268	118202	109121	114652	118555	118991	129228	135607	96442	70318	103332	95817	97905	80684	97592	108281	109295	93957	104924	89658	115728	83570	94916	87322	89489	93574	85985	99805	88529	96419	86600	92188	76567	89956	92283	85452	85320	90193	100658	104758	109201	96492
11.4667								114816	122269	110471	114715	117356	118838	129701	132916	96492	71202	103418	96213	97880	80351	96085	109831	109841	93499	107349	90303	114559	83939	95767	85449	90710	92440	85502	99235	88167	97054	87273	92206	76174	90483	92271	84537	86104	90800	100335	104741	109984	95642
11.55								110955	118863	110625	117262	115703	117599	127140	133638								109896	106967	92728	107516	89455	115612	84553	94988	87475	89964	92240	86157	99253	88135	96010	86540	92376	76166	89511	91681	86068	85674	89543	100242	105275	109691	95498
11.6333								114142	116713	109896	115482	116906	117058	127217	132681								110873	108690	93500	106811	90176	112001	83475	95406	86274	89951	92724	85534	99246	88107	95989	85717	92510	76419	90367	92206	86096	85824	89331	99760	105305	111143	95293
11.7167								114629	122692	110646	117346	115928	120164	129585	134016								108515	108416	92693	109014	88875	115704	83279	95382	86276	90437	92264	85352	99428	87334	95555	86338	92127	76491	90310	91496	85408	85540	90043	100290	104291	109644	96573
11.8								115043	122564	111372	115508	114502	117726	126015	131898								110562	108154	92156	107930	89748	111759	82719	95178	85742	89316	92761	86015	99539	87481	95846	85864	92361	76557	90451	92742	85773	85345	89422	99483	104314	112202	95050
11.8833								112651	118834	107641	114652	115189	116613	128011	132099								109299	107490	92090	106495	88847	114709	83892	94605	86398	89014	92413	86322	98905	88711	95662	85598	92718	77036	89483	92936	86064	85425	88997	99515	104822	113155	94969
11.9667								112651	117156	109180	115641	115407	117527	129001	129643								108475	107803	92537	107854	89867	113419	82508	94418	85578	89203	92078	85836	98781	87626	94978	86400	91530	76359	89296	92031	85252	85917	89349	100068	105130	107388	96138
12.05								114953	118464	109154	116495	116412	117931	126549	130182								109904	107323	92603	106995	89153	113083	82101	94869	85164	88646	91765	85842	100051	87766	95629	85963	92447	75791	89323	91778	85251	85862	89267	100095	104877	106531	95287
12.1333								112903	118361	107751	114361	112686	121054	126537	132059								109337	107170	92123	107166	88926	112227	82154	94514	85901	89192	92037	85555	99452	87510	95592	85298	92453	75516	89847	91814	84847	85808	88774	100026	104325	108667	93762
12.2167								113256	116026	108466	114389	115267	117553	128494	132919								112115	108008	90825	107155	89036	112688	81926	94782	86294	89716	92787	85404	97956	87296	95111	85526	93698	75764	89446	92072	84860	84989	89822	99024	104638	109463	95557
12.3								113307	121697	108893	115926	111276	118084	125746	131752								108711	108788	91862	105690	89333	113630	81608	94504	85876	88735	91682	85400	98385	87229	95349	85949	92439	75738	89802	91646	84592	84941	89687	99731	104383	107567	95537
12.3833								109355	119785	109240	116097	113406	117141	126857	130618								110962	105662	92019	107640	88556	111198	81983	94126	85578	88989	91966	85084	98047	87118	95152	85728	92695	76325	89830	92485	84930	85528	88723	98700	103669	109805	96380
12.4667								111062	118266	107986	115034	114972	115575	127263	130985								108667	108234	91216	105849	88380	111045	81360	94098	85749	88551	92529	84905	98443	87046	94895	86142	92425	75583	89978	91504	85235	84826	88493	98913	103627	110426	95306
12.55								109470	116559	108725	116269	112262	115256	126886	131530								108168	107499	91935	105987	88729	115008	80508	93796	85464	88065	92424	85175	98760	87120	94888	85352	92378	76211	89537	92235	85084	84495	88773	98783	104621	106988	93827
12.6333								112628	116096	109152	112461	113411	113834	126584	134871								107937	106996	91863	106460	89242	112261	81348	93828	85469	88197	92943	85756	98154	86709	94766	85890	92493	76002	89009	92350	85410	86051	88502	98485	103582	108406	94940
12.7167								111336	117015	108498	115020	112712	115199	124302	128295								107691	108642	90833	106248	88451	111578	80156	93383	84485	88369	92024	84752	97905	86294	94099	85564	92440	76616	88775	91381	84500	84674	87955	98249	103065	111236	94926
12.8								107900	118126	107885	112448	116633	117315	126125	131665								107208	106468	89572	105674	88169	112474	80405	93111	85267	88297	92096	85275	98863	86185	94503	85986	93551	76183	88887	91340	84412	84856	88635	98825	103006	107624	94355
12.8833								111220	116322	106134	114781	112624	115094	126477	131647								106696	107084	89882	106404	88475	111273	80250	93185	84684	88789	92088	85351	98651	86631	94752	85641	92958	76484	88214	91778	84516	84710	88322	98147	103459	106263	94016
12.9667								109682	117811	108261	115702	114214	116771	127174	131910								106535	107313	91013	105263	88222	111563	80345	93720	84854	88219	91274	85728	97593	86432	94529	85949	92838	76226	88186	91150	84683	84926	88311	98238	102657	108098	93891
13.05								107738	116711	107859	114317	109314	114729	129898	129975								109172	105976	89690	107264	88392	114037	80029	92909	84737	87924	91460	85189	98254	86870	94691	85586	91835	76057	88178	91601	85309	84648	87437	98391	102736	106673	94271
13.1333								111599	118916	108907	114162	114408	116152	124177	133068								106604	106033	88664	104462	87503	110263	79156	94160	85257	88302	91697	84569	97697	86178	93919	85249	92425	75720	88162	92314	84427	85030	88288	98298	103411	109596	93476
13.2167								112120	116240	107606	116107	113154	118698	123947	131160								105803	105646	88878	107062	87634	111022	78949	92643	84804	88132	91269	84671	98045	86548	93842	85153	92856	75505	87846	91829	84251	84848	88347	98652	102544	109352	93117
13.3								107936	114884	108382	115132	113809	116688	124507	127392								107361	108554	90287	106592	88151	108510	79081	92907	84802	88237	90694	84427	97422	86829	93416	83975	93078	76134	88057	92074	85222	84756	87720
13.3833								111000	117007	106735	116379	113661	116783	124561	129964								105487	105875	89251	105633	87047	108245	78794	92352	84509	88645	91176	84303	97883	86361	93946	85325	92308	76107	88032	91763	84939	84912	87683
13.4667								112907	117612	105362	109205	111910	117647	127335	128438								107194	107450	89147	104697	87563	109265	78545	92503	84044	87886	90763	84140	97541	85969	93450	84942	92699	76323	87444	90982	84065	85112	87475
13.55								109887	117709	105538	111823	111877	113833	123162	130552								107859	106644	89549	104748	87654	109029	78366	93223	84847	87546	91437	84830	97625	85916	93285	84696	92667	76075	87070	91679	84812	85309	87691
13.6333								108954	115348	105218	115254	112451	117000	126762	128036								108102	105671	89136	105191	87947	110810	78400	92187	84478	88333	91026	85161	97983	85653	93746	85376	92320	74936	87240	91609	84456	85401	88268
13.7167								107227	117433	105309	113980	111420	116676	121913	130124								108498	105073	88668	106083	87154	109811	77932	92653	84081	87757	91043	84321	97131	85801	93236	85167	91416	76078	87215	92006	84150	84077	88313
13.8								105879	117079	106756	111069	112059	117292	122234	128878								107719	105179	89677	105201	87316	108570	77673	93161	84732	88239	91336	84219	97499	86403	93062
13.8833								108550	115770	108908	112217	108191	113994	125200	131079								108227	104836	89249	103543	86916	110326	77363	92243	83720	87769	91082	84672	97411	85587	93548
13.9667								107198	119779	106956	112817	111565	113203	123755	129443								105645	106386	88585	104339	86947	110516	77030	91993	84075	87389	90112	84297	97709	85956	92592
14.05								109084	115116	106026	112656	111242	113013	124921	129801								107440	106093	88091	105206	87132	109184	76452	92109	83880	86853	91132	84012	97549	85934	92868
14.1333								109993	117096	107450	112942	111355	115121	122744	131740								107408	107440	88791	104099	86771	110367	76204	91894	84059	87627	90955	84104	97367	85697	93149
14.2167								111297	117051	105121	112303	110823	113245	124095	127051								105024	105934	88360	104573	86576	108158	76460	91141	83747	87200	90006	84149	96875	85014	93387
14.3								108225	116531	107257	112323	109702	115943	125012	127230								106311	104940	88239	104728	87284	107602	75783	91394	83374	88125	90668	84135	97513	85213	92400
14.3833								107533	113602	106779	112004	106779	113519	122702	126405								107459	104727	87735	105105	86938	108363	76207	91542	84496	87317	89771	83271	97202	85088	92202
14.4667								108063	116176	105494	110907	109088	113698	122301	127736								107487	105151	88127	104004	86433	107490	75209	92252	83549	86984	89861	83251	97454	85005	93313
14.55								107187	116787	106050	114629	107578	112674	123287	127375								105119	104925	87326	103691	86697	107468	74991	91332	83596	86914	90587	83438	97692	84261	92405
14.6333								106814	115017	106534	111120	109487	111762	123852	126665								106106	103862	87192	103668	86817	107193	74478	91004	83972	86638	90753	83713	97088	84088	92425
14.7167								107787	118662	105879	111097	110906	110318	121260	127635								105961	105680	87138	103458	86814	108999	75258	91689	82980	86457	90205	84238	96747	84558	91852
14.8								108292	114057	105122	113550	111503	111738	120859	129481								106329	104735	86414	103361	86419	110816	74577	90930	83530	86742	90470	84286	95697	84327	92587
14.8833								106623	115492	106462	113309	108691	115306	120724	128740								107599	105336	86602	103428	86329	109307	74091	90959	82864	87107	89954	83967	96086	84872	92201
14.9667								106029	115701	106021	107120	107799	111732	125245	128117								105383	104150	86645	102969	86570	109621	74408	91820	82250	86945	90640	82890	97639	84132	92134
15.05								109144	116266	106182	109334	108649	112883	123199	126621								106261	104634	86591	103032	86575	105639	72730	91100	83099	86258	90032	83213	96639	85091	92409
15.1333								108248	115189	104075	111359	110823	113284	123563	128191								105268	103855	86018	103603	85504	109879	73522	90535	82777	86174	89614	82568	96151	84079	92214
15.2167								106983	114947	104512	110931	108667	111760	123172	127551								104506	104159	86559	103524	85692	106617	73248	90471	82780	86207	89916	83043	96520	84074	91661
15.3								107110	116515	104730	112219	107557	110355	121791	126906								104732	103940	87090	103393	85462	106775	72728	90646	82154	86829	89814	82428	96672	83996	91736
15.3833								107727	116635	104137	109596	109475	113598	119468	124611								105003	102435	85593	102350	85129	109464	72253	90833	81994	86441	89422	83146	96439	84295	91044
15.4667								105820	113525	104216	110011	108698	111879	121406	124572								105775	104498	86304	101784	85395	106961	71597	89992	82267	87381	90126	82621	96408	84421	91132
15.55								108220	113766	103479	110403	108606	109309	122173	125609								104729	102641	85288	102401	85934	106470	71351	90140	82222	86057	89268	83096	96368	84135	91143
15.6333								106106	112668	104911	110118	106110	111485	126759	125661								105562	102965	84601	102723	85269	105636	71338	89768	83032	85734	89905	83511	95660	84577	90420
15.7167								107996	113588	102894	108742	108315	111683	121182	125647								104232	102315	85392	102153	85302	108075	72361	89712	82450	85440	89139	82616	96002	83861	90357
15.8								108030	112290	103806	108903	106620	111762	120663	126247								106011	101752	84883	102646	85143	109638	71506	89446	82178	86180	88906	82647	95703	83400	90299
15.8833								106269	116249	103697	107225	107771	109609	120849	125333								105620	102101	85381	101962	84675	107585	70696	90230	82872	85291	89415	83095	96553	83911	90862
15.9667								107148	113308	104208	109668	108328	112285	120518	128896								104760	102244	85163	101792	85314	106579	70684	89670	82854	85341	88929	82274	96035	83514	90961
16.05								106818	110820	103473	109199	106975	110914	123899	121888								104677	102041	84570	102580	85262	107753	69510	89398	82072	85071	89164	82491	96669	83439	90459
16.1333								105307	114135	103077	109249	107788	114069	121348	124465								104229	101600	84971	102636	85518	107832	69277	89225	81735	85625	88717	82078	95962	83036	90146
16.2167								106648	113120	102897	106770	107863	110321	125160	124346								104091	101271	84557	100979	85524	107694	69097	89020	82582	85562	88921	82602	95234	83179	91155
16.3								105393	111753	103420	107339	106367	113016	119613	122641								103923	100700	84409	101713	85009	111713	70386	89346	81632	85175	88391	81712	95013	83532	90034
16.3833								104981	113652	102925	110439	107546	108961	121058	124406								104681	100538	85463	102267	84244	105961	70466	89616	81909	85405	88969	82197	94651	84059	89866
16.4667								106648	112163	102674	110764	108709	111399	119071	126081								103916	100365	85165	101468	84392	105804	69874	88393	81709	85373	87841	81841	96216	83637	89589
16.55								106483	110974	102690	109973	106932	108858	118512	125269								103601	99468	85179	101337	85144	109749	68988	88862	81475	85495	88709	81936	95382	83152	89963
16.6333								105364	112647	102121	106024	106113	112059	120370	124482								103651	98823	84637	100017	84672	108253	69406	88538	81482	85241	88462	82392	95716	82685	89213
16.7167								105775	109314	102204	109647	106575	107556	124315	124244								103326	98699	84023	101264	84304	107576	69494	88593	82009	84915	88517	81953	95624	83643	88902
16.8								105817	113724	102119	110535	105782	109139	118606	122547								103558	99919	84520	100683	84279	107327	69443	88199	81395	84862	88892	81876	95010	82723	89490
16.8833								105618	111499	102578	107024	106820	111079	121547	123895								103769	99753	83669	100471	83932	106060	68569	88743	81326	85421	88382	82141	94579	82336	89333
16.9667								105467	110352	102172	106760	106046	106800	119575	124055								103360	99727	83716	99777	84362	106477	68909	88599	80941	83789	87967	82025	95126	82810	89347
17.05								104821	110589	101932	107318	106396	110661	116914	123305								103513	99876	83439	100134	84070	106509	69053	88264	80969	84360	88323	80932	95128	82301	89480
17.1333								105114	110226	101214	107097	106911	109356	119833	120740								101999	100197	83560	99932	84464	105407	69049	87371	81458	84725	87955	81956	95691	83559	89926
17.2167								105077	109809	101408	108939	107872	107702	120941	125571								103342	99358	82509	100514	84890	106092	69785	88053	80886	84522	87740	81202	95240	82488	89971
17.3								104133	110355	101276	106343	107361	109886	117987	124312								103473	99156	82898	99401	84428	105890	70061	87544	81113	84686	87818	81086	95446	82802	89005
17.3833								104831	108526	101323	105117	106641	110373	116549	122487								102620	100112	81193	100554	83979	105824	67403	87934	80339	84117	87402	81490	94722	81993	88373
17.4667								105020	110918	101117	107442	106454	106534	119245	123167								101803	98967	82428	99326	84076	107695	68352	87516	81006	83989	87635	80928	94140	82095	89124
17.55								104590	114088	101092	106958	105640	108811	119716	121059								102280	99918	82637	99571	83503	106681	67983	87314	80382	83552	87733	80891	95183	82568	88751
17.6333								104736	110879	100794	106960	105903	107268	118682	121251								102159	99953	81596	99913	83398	104549	68053	86735	80421	83346	87400	81538	94826	82575	88356
17.7167								105073	112553	100832	106426	106243	107047	119787	120291								101865	98412	81135	98993	83369	104500	67747	86692	80245	83373	87576	81199	95141	82242	88460
17.8								104522	110722	101098	108374	105960	108153	119067	123689								102648	98189	81752	99094	83140	106466	68338	87238	80180	83890	87661	80981	94476	81725	88086
17.8833								103844	112918	100430	108467	106658	107505	117316	124729								102842	98454	81394	99622	83779	105699	68268	86823	79931	83657	87074	80774	94578	81669	88198
17.9667								104731	108204	100644	106525	105824	108623	118729	119868								101573	97329	81037	99554	83818	106269	67675	86887	80221	83076	86785	79912	95596	82635	87609
18.05								103527	109599	100177	105785	104891	107620	119567	123084								101948	97596	81144	98807	83310	106921	68245	87578	79979	84066	87615	81134	94692	81653	87853
18.1333								104087	108767	99079	106518	106667	110669	118717	119490								101357	97072	80680	98822	83212	105543	67960	86928	80244	83453	87772	80437	94491	81525	87365
18.2167								103443	109603	100304	105186	105082	109698	116514	122239								100952	96312	80967	98795	83690	106703	67631	86564	79672	83340	86908	80441	94420	82153	88619
18.3								104718	108142	100345	105698	105395	109267	118623	121722								101294	96714	81121	98138	83114	103976	67413	86146	80149	82933	87312	79655	95083	81390	87287
18.3833								103573	111496	100248	106953	104640	109076	117907	122501								100441	95747	80278	99408	82193	106516	66785	86976	80003	83309	86972	80592	93869	81375	87902
18.4667								103007	110668	99736	106431	105087	107073	117010	121306								101055	95368	79757	98569	83240	105687	66818	87101	80076	83419	86997	79525	93921	81400	87444
18.55								103466	108872	99852	105622	105764	106957	118885	119922								101246	95475	80759	98270	82418	105025	66841	86667	80160	82984	86991	80128	94076	82253	86808
18.6333								103972	110253	99435	107227	105378	107475	117391	123434								100562	94715	80622	98348	82994	106625	66997	86186	79412	83426	86820	79672	93875	81584	87061
18.7167								102590	111110	99296	106704	104964	106418	118340	124010																80573	82758	86710	79409	94140	80859	87306
18.8								102582	109546	99324	105805	104668	107588	118491	121913																79859	83062	85955	79400	94192	81126	87227
18.8833								102938	110450	99284	105813	105354	105985	117559	124357																79303	82799	86263	79801	93750	81234	87313
18.9667								101913	110871	98569	105078	104428	106601	116855	120549																79545	82907	86681	80024	93622	81729	86791
19.05								103267	107584	99508	105243	104595	109479	119364	117802																78902	82756	86119	79675	94023	81215	87379
19.1333								102927	111831	98906	105223	104264	105223	114593	119297																79162	82091	86676	78239	92841	80630	87112
19.2167								102549	112504	99264	105003	103634	105125	117652	121971																79546	82439	86204	78876	93925	80892	87194
19.3								103317	109081	98706	104525	103843	105597	115260	121510																79169	82278	86558	79128	93925	80664	87050
19.3833								102210	111205	98106	105322	104084	106491	119116	120307																78568	82197	86677	79458	94241	80959	86362
19.4667								102286	110255	98189	105449	104598	107164	116901	118910																79277	82541	85776	79434	93399	80169	85559
19.55								102588	108652	98154	105272	103704	105402	117183	117294																79635	82299	86327	78876	93320	80517	86131
19.6333								102599	108318	97469	104277	103814	105810	118273	120286																78091	81796	86260	79663	94328	80771	86032
19.7167								101861	109108	97910	104214	103209	106808	114973	117827																79249	81921	85712	78930	93025	79997	85549
19.8								102249	108075	98340	105118	103512	104945	115261	118766																78462	80958	86122	78862	93544	79801	85600
19.8833								101160	111413	97787	104955	102722	105421	117670	117012
19.9667								102544	111771	97838	104292	103180	106516	117623	119448
20.05								101557	108299	96964	103294	103246	105851	117150	119091
20.1333								101541	108253	97719	104212	103506	106080	117410	117893
20.2167								101834	108885	97199	104461	102712	105896	113824	119030
20.3								100466	110920	97297	103734	102284	108150	116997	120047
20.3833								100668	107660	96772	103464	102232	106769	115956	119083
20.4667								101763	107071	96908	104698	102289	105850	114632	117063
20.55								100341	105630	96327	103330	102069	105204	117615	117346
20.6333								100685	108659	97294	104146	102603	105351	117522	118054
20.7167								101005	109583	96790	103080	102226	105213	115404	118909
20.8								100323	105111	95916	103249	101529	104705	116345	116953
20.8833								101067	107412	95676	103940	102517	105130	114661	118171
20.9667								100509	106241	95727	102749	101648	104650	116546	118906
21.05								99827	109780	96567	102820	101757	104267	112099	117889
21.1333								100573	105541	96305	102854	102047	104552	111754	117044
21.2167								100604	106313	96228	102074	101513	105067	116309	118250
21.3								100167	106764	95135	102900	100957	104365	111876	115512
21.3833								100179	107509	94993	102410	101033	104496	114487	117902
21.4667								99985	107880	94866	102387	101035	104262	117269	116761
21.55								99606	107192	95270	101624	101321	104681	113840	117010
21.6333								99089	106888	94765	101914	101265	103714	115345	115866
21.7167								98974	103965	95015	101072	100681	104918	116911	118519
21.8								99830	107797	94922	102092	101121	104745	114437	117828
21.8833								99142	105654	94784	101313	100559	103724	113933	117352
21.9667								98893	109234	94916	102240	100124	103614	112661	118698
22.05								98781	107100	94311	101473	100513	104375	115942	114347
22.1333								99129	106124	94037	100762	100156	104408	112065	117192
22.2167								99717	106905	94398	101329	99989	104138	112337	114277
22.3								99322	106550	94619	101116	100073	102756	113323	116549
22.3833								98353	106276	94531	100971	100153	103270	113107	113723
22.4667								97940	107102	94306	101064	99593	103713	114154	116064
22.55								98152	105958	93961	101100	100204	103581	114067	115471
22.6333								98057	105855	94139	100370	99624	102647	112550	113322
22.7167								97692	105752	93679	100802	99716	103229	112590	112940
22.8								98193	105702	93490	99966	99484	101776	115004	115091
22.8833								98018	106355	93845	100539	99274	102495	113722	114042
22.9667								98206	105462	93108	100454	99169	102668	111459	114993
23.05								96920	105755	93189	99599	99200	101886	111660	112625
23.1333								97720	105323	93402	99658	98384	102077	112694	110473
23.2167								96837	105644	93290	99862	99110	101704	113646	117119
23.3								97735	106327	92953	99819	98934	102000	112984	116817
23.3833								97067	105289	92805	100128	98843	102144	111633	117269
23.4667								97463	104969	92322	99153	97913	102019	112866	115357
23.55								96483	106050	93667	99792	98378	101260	112622	115372
23.6333								97330	105639	92920	99432	98208	101458	111026	115641
23.7167								97279	105083	92465	99859	98194	101218	114483	115099
23.8								96981	103862	92257	98728	98575	101319	110871	113808
23.8833								96403	105201	92274	98564	98192	101339	112490	114293
23.9667								95913	105802	92315	98204	98661	100934	115469	112941
24.05								96663	106257	92114	98223	98457	101096	111719	111361
24.1333								96344	104708	91838	97971	97705	101473	110054	113399
24.2167								96195	104322	91553	98475	98051	100180	111490	113719
24.3								95835	104822	92117	98252	97410	100273	110472	111229
24.3833								95577	104782	91026	98652	98000	100530	112187	112498
24.4667								95658	104776	91809	98392	97367	100280	111037	113147
24.55								95847	104802	91232	98418	97310	99841	112272	113142
24.6333								95044	105463	91599	97614	97489	99965	110540	115488
24.7167								95448	103842	91157	98302	96787	99345	110215	114015
24.8
24.8833
24.9667
25.05
25.1333
[truncated: 69 more columns]
