# Supplementary material for: Rate-limiting transport of positively charged arginine residues through the Sec-machinery is integral to the mechanism of protein secretion
Source: eLife. 2022 Apr 29;11:e77586. doi: 10.7554/eLife.77586 (PMC9110029; doi:10.7554/eLife.77586)
Supplement: Figure 7—source data 2. [file elife-77586-fig7-data2.xlsx]

## Sheet: Sheet1
time from injection (min)	wt	FW	LA	FW	LA	FW	LA	QK	∆h2	QE	∆φ3	QR	wt	wt	∆h3	KQ	AL	KR	IT	RQ	RK	QR	∆φ1	LXX	EQ	∆h1	TV	∆φ2	wt	IT	RQ	RK	QK	∆h2	QE	wt	∆h1	TV	∆φ2	∆h3	KQ	AL	KR	wt	wt	∆h2	QE	∆φ3	QR
-8.1	134415	138075	170616	134629	163911	127299	154980	48485	57653	46606	60748	50900	49179	117813	143253	137176	117548	129222	143394	132428	121507	155582	164532	143895	140886	153025	138328	150530	136468	155131	161235	142805	133541	140945	107620	120001	119983	118722	134125	134112	123948	108546	109382	104502	106321	126888	97340	136704	115852
-8.01667	136097	143891	176154	140929	166131	130389	159554	50205	59397	48392	63002	52639	50348	118585	140609	138993	126016	129098	146017	138501	130698	155902	163863	153342	144226	155187	141143	158175	138926	155656	163618	142902	133312	145914	113721	121767	123623	124798	135673	138912	129536	112706	112284	107233	110689	136030	100532	141031	119158
-7.93333	138627	143215	178719	141460	173618	134099	168740	51100	60658	49458	64693	54271	52022	121653	149895	141384	124455	131855	152664	141627	127281	160412	167572	153937	146091	159992	144414	159311	144261	156779	161961	148699	132983	144662	119240	120567	128764	125846	136791	139630	130618	119634	118792	111770	112159	136544	101631	147521	127666
-7.85	138965	147283	178269	142266	174762	137849	170174	51793	61065	50637	65849	55226	53479	125739	147113	144777	128314	135483	150558	143656	135074	162144	167357	151390	149483	160961	150555	161922	147111	157697	162766	147948	134179	148901	115219	126151	130609	126423	141430	143309	134477	118797	118013	117356	116304	137227	103698	146570	129907
-7.76667	140919	151842	183703	147681	181399	136384	171977	52308	61685	51145	67174	55850	53940	120847	148687	145988	130265	136416	155270	147514	133330	162021	170671	159093	146099	160918	150561	169490	145545	156971	163530	147738	134537	148618	119608	128624	134322	128407	146150	145526	135110	124963	124004	119337	115588	135565	104693	152686	129763
-7.68333	144105	147770	182811	144533	182596	139263	177681	53577	63179	51680	67697	56965	55381	125111	150621	146946	129632	132676	156022	149888	138214	161395	170027	159696	150025	163313	149231	165036	147322	157172	164213	148975	137867	151434	120092	129105	133104	129073	150207	147405	137481	125231	126852	122017	116183	141823	106928	150778	132768
-7.6	145099	146771	188379	148162	181830	140822	178178	53526	62982	51926	67721	57573	55476	124819	148562	150080	132603	139242	155103	152143	135784	166602	170444	160689	151338	162914	156271	168866	153709	158940	168955	146593	136676	151076	116805	128324	133823	131523	149360	149636	144019	126239	127326	121775	120707	140587	106853	151431	133363
-7.51667	144244	151222	186565	146956	185270	139811	179226	54811	63678	52476	68995	58546	56221	127588	149522	147884	131681	139405	156209	152756	137389	164897	169554	158753	147937	169397	157065	171598	152287	158695	167165	151845	133840	152401	118269	128105	137489	130702	148654	154842	143310	127281	128566	123009	120265	141472	106803	150154	134826
-7.43333	148147	153090	190031	151129	187608	142310	181430	55051	64262	52982	69491	58811	56517	123315	151194	151034	134563	140080	161668	151143	141194	170151	168577	159730	156113	164546	152846	172128	153268	160207	167822	149224	135016	150262	119530	129789	136730	130528	149992	153962	143447	132133	130929	127635	123146	141235	107085	152894	139594
-7.35	145840	152252	187066	150165	183983	143268	182082	55053	64416	53068	70380	59331	56678	129284	149279	149756	130370	139763	159459	154725	143639	165467	174140	162521	155403	166721	152234	172361	153311	162033	166598	151175	134758	153921	120545	130153	142587	134488	154109	156253	142662	131874	131170	127153	124908	143386	108384	156403	136600
-7.26667	145154	150995	191496	151845	189669	143518	182419	56049	64814	53223	69745	59798	57467	129323	151718	148097	133368	139010	157974	151501	142994	169145	172670	161479	156798	167836	154767	176174	150613	158026	167217	151952	137789	150786	118448	131623	141123	136364	155139	155961	145735	127083	130755	131408	122990	139815	108852	157978	140232
-7.18333	149014	152798	191387	150357	189588	145641	186417	55863	65564	53599	70744	59923	57404	129314	151291	150389	135572	139628	162824	155534	144459	166014	171224	164634	152592	166396	151427	173811	154829	162032	165046	150139	138254	153954	119683	129469	141475	136486	153494	156769	144588	136125	133041	128487	125805	143857	108474	158408	141688
-7.1	152089	150940	189673	148607	186446	143742	188533	55631	65467	53806	71077	60469	57481	124790	150367	150323	133139	138389	161890	156522	143108	167994	170782	160089	157587	167522	152762	174238	151964	155238	166283	149798	138169	152645	120410	131385	143481	139694	154603	155062	145757	132489	135004	132369	124883	144602	108128	158260	140099
-7.01667	148063	154083	190841	151845	189046	146576	182954	56829	66420	53733	71259	60502	58382	128131	152111	150790	134274	138580	161428	158334	140808	170346	166427	159309	155413	162203	155247	171652	154233	161431	166658	150722	137582	148864	123308	129211	141696	136989	155134	156707	152432	135825	134573	130433	128002	145122	108194	160502	138613
-6.93333	148928	156578	196282	153824	190976	143661	185760	56672	66399	54373	71120	60974	58013	130202	152438	152373	133533	139338	161472	157683	144937	168331	170311	162408	151533	162868	155117	173137	151172	157272	167369	152376	136213	151634	120154	129123	145165	139156	158381	159941	145659	134210	133660	131241	126307	143415	106292	160926	145886
-6.85	148866	154724	189471	147869	192582	146999	188529	57403	65629	55245	71249	61156	58488	127315	150483	153589	135280	142354	163739	159271	142355	170820	170638	162021	154425	165755	156731	174742	154919	159388	164065	151062	136288	151186	122979	128834	143695	139421	158543	157529	149969	134102	135429	134272	125347	145330	108101	157912	143028
-6.76667	149435	155877	193101	148360	187546	146070	186036	56994	66865	55134	71712	61647	58929	131104	152015	152626	134176	142120	163835	157100	141051	166986	169276	160012	154702	168751	153923	175507	156524	159980	165408	151717	135604	151614	121510	130891	144487	140222	160295	159365	152691	135487	134439	137400	123623	146022	107794	160149	146121
-6.68333	144640	153764	193731	149869	189658	144444	186455	57517	66819	55041	71259	61489	59476	130903	153866	151630	133071	141543	160961	159682	147044	167069	171795	159786	154227	164118	155207	173914	152885	161384	162667	148427	136335	152131	122554	131327	148071	141703	158183	159812	151574	138355	134698	137665	127467	144700	108441	156449	147037
-6.6	153988	152896	189545	149061	185955	145844	186541	57916	66562	55086	71604	61591	59342	129664	156078	152328	134372	142764	161051	158134	145982	168285	171653	163562	156044	167960	155000	173751	154267	158432	161444	147400	133956	150736	120735	128696	145956	140906	159450	158385	148871	138535	135429	137547	125489	148444	107213	161229	146186
-6.51667	148499	154380	187984	151708	192062	148063	192796	57050	67293	55360	71870	61513	58761	128486	149597	153458	138022	141542	158258	155982	142602	165319	170968	164802	156683	169200	155739	173773	153876	157243	165533	148117	136509	151585	120287	130843	145770	138733	162068	160405	152888	137847	137834	137401	129221	147671	107139	163076	147915
-6.43333	147354	157325	190875	151729	190944	146546	189056	58439	67086	55522	72851	61781	59306	127675	156286	151441	136241	141407	161465	160719	142837	167768	167018	159314	151676	165270	153894	172326	153856	158330	167285	151209	137446	152596	120166	132895	146645	143726	161316	160531	157415	141937	139906	137679	126988	145291	109764	160210	144901
-6.35	152448	157393	191933	150479	188523	143718	188415	57963	66984	55829	72541	62159	59405	132714	151174	152526	132019	139440	163733	158243	144413	164607	167030	160064	156305	163501	155669	170122	153748	160776	163311	148001	136697	152515	122314	129672	145709	139472	158039	160563	151450	138099	139173	138249	126224	144055	111736	158323	144254
-6.26667	151900	157042	192522	153413	190816	145086	190242	58125	67195	55836	71774	62501	59957	126473	150519	152308	132634	140814	161364	158859	142239	164733	167130	161737	150522	167866	153744	174627	151712	158414	164817	149283	132840	151914	118796	129656	147378	143828	161273	161119	154661	135760	139044	137715	128028	146591	112148	156634	147681
-6.18333	151336	157197	193050	151731	189488	145298	191863	58313	67587	56106	72634	62309	59441	130125	155314	151083	133816	139473	160868	159678	143170	166584	167893	157864	150793	165848	150182	169453	154494	156642	161563	147926	134956	149599	120099	129157	147382	142647	162809	159989	155688	138606	139560	137848	130888	147894	110365	162691	147729
-6.1	149790	153225	192331	149894	189033	145459	188624	58684	67248	55895	72780	62720	59648	128303	150757	150865	133650	141341	162147	157130	143458	162442	166695	156341	154335	163790	155496	171666	155213	158065	162312	151212	132097	151197	119393	130330	147798	140639	159983	161394	158115	139056	138306	139869	129570	147020	109556	162954	146721
-6.01667	153864	154564	193818	150747	186187	149044	185955	58210	67021	55617	73095	62365	59285	129970	149678	150147	134279	136240	160107	160694	145904	166348	167630	159545	150943	160107	152961	172331	152336	158580	164060	148016	134328	151632	121909	131720	145301	142251	161279	164370	155200	141473	140643	138065	130691	145244	107668	157776	145098
-5.93333	150401	157303	192037	151146	189174	147242	188189	58145	67599	56292	72051	63118	59907	128191	148008	150924	130564	142990	161277	153647	145367	164211	164798	159752	151658	161990	154407	167599	151674	158037	164915	146690	133183	151009	123400	130536	148982	142628	160966	164235	155990	140722	138637	138548	129179	144029	105562	160527	147471
-5.85	152619	154795	185757	152843	192395	147597	188227	59036	67949	55954	72885	63059	60213	126131	150094	153984	133930	139662	163247	158083	142731	167026	165911	158991	151552	164636	151328	172845	153990	157207	166971	148081	135623	152749	118792	133394	148753	140100	164035	164522	156407	141697	140689	140943	130450	146444	107428	161921	147559
-5.76667	149158	158064	189893	151064	188893	146419	186747	58363	67295	56079	73616	63122	60287	130281	153568	153448	134330	140863	161212	159203	145419	162151	163569	157037	151166	160891	152869	168810	153411	159446	163891	146754	134126	151797	120394	133344	150585	140908	158787	162472	154971	138630	139925	142294	128414	141624	108364	159506	143519
-5.68333	151567	154393	186345	150990	187352	149156	189549	58372	67279	56031	73474	63165	60374	130270	156577	152608	132452	139335	160152	159634	143808	165008	166973	159108	149866	161866	152499	167612	151334	159195	163542	150345	135207	148541	123441	129944	149186	141978	161260	163805	157165	142495	143195	140941	128336	145334	107621	161200	148306
-5.6	149803	159369	191267	152524	190673	145742	186816	59367	67764	56532	73102	63290	60198	129330	151788	151688	133461	137490	161637	157827	146491	167011	162246	154081	150860	162467	153468	168829	154195	158261	165300	144501	131962	149755	121315	128320	149159	141950	162311	160417	160444	140255	143605	142746	132196	145721	108445	160686	145873
-5.51667	149715	151457	189414	152054	186964	146231	189518	59326	68732	56351	73682	63050	60485	130581	153707	148036	133903	139951	163224	161077	143330	165999	163760	153550	150194	164171	148631	167037	153949	156899	162052	149158	132985	149207	119340	129717	148530	144480	162447	161325	157270	140795	146909	142725	131293	144614	106904	155037	147315
-5.43333	150976	155923	190258	148706	189626	145661	187981	59939	68478	56280	73169	63813	60713	129361	152015	148877	130989	136611	161804	160807	143987	163879	160439	155795	149876	162825	150747	172244	151947	160217	166027	146980	134537	149377	121844	125875	148370	144511	160232	164715	158003	141414	144165	144368	131970	145055	106913	156784	147534
-5.35	148550	155279	190134	150109	185058	142828	188126	59679	68420	56732	73673	63539	61363	129290	150550	153262	132412	137817	162873	156243	144184	163999	163396	154451	150988	162793	149437	169091	152443	158475	162915	144842	131929	144602	124802	126506	148620	143720	162206	160636	158121	144141	140968	143691	130884	145988	107185	158900	144576
-5.26667	151731	158356	191806	149950	189097	144389	188704	58963	68990	55965	73166	63456	59933	127184	152720	149597	133300	137094	162410	157157	143716	164348	162532	153098	147695	161016	152517	170577	151785	156637	160596	144041	132556	150626	117844	128272	150861	143704	164105	164551	156548	142644	142154	144722	128384	144989	105760	158324	146684
-5.18333	151575	156040	188701	148802	186105	147588	185078	59620	68611	56996	73700	63102	60129	130119	152959	148930	130710	136756	161501	156118	138148	162884	162696	155581	150509	158856	149336	169076	152964	159718	163421	142014	129436	152169	118632	127031	149802	142707	165268	161914	159773	141229	142195	145162	128482	144609	108336	157225	144651
-5.1	149621	153280	189651	152748	188865	146057	187941	59410	68186	56733	73607	63306	61120	128271	152655	152182	132142	133021	156293	159668	142638	162510	158779	155243	149066	159194	147315	170765	149718	154831	160105	144217	130095	149719	123949	131041	150849	144443	165991	164859	155966	141661	142834	144573	131593	146874	105516	157133	147614
-5.01667	150651	153065	187158	150265	186381	148069	187764	59872	68272	56705	73741	63603	61104	129294	151864	149502	130841	141296	160047	158030	139668	162457	158912	152182	148218	159462	149693	168926	150107	156838	162874	143820	132535	148772	117988	130307	148934	140274	166370	163365	158227	144488	141669	145356	127235	144024	106219	157558	144609
-4.93333	150477	154905	185478	147815	183310	144219	186826	59824	68404	57065	73735	63754	61633	129746	149539	150151	130598	136643	157993	156891	141198	164671	160096	154999	150882	162191	149117	167599	148882	159434	157506	143583	130805	150166	123455	126506	151280	143411	162848	164726	159133	140799	141162	140123	132733	146077	105363	154043	145848
-4.85	152913	156252	188638	145801	186193	146198	190042	59473	69345	57010	73163	64105	60253	127346	152265	150561	132791	134716	155576	162584	143203	159604	156619	154085	148639	159707	148926	163623	151752	156518	161287	144041	130759	145909	119102	131030	149691	142114	165230	163226	154907	141001	138678	145085	131902	143683	107011	160468	144902
-4.76667	152593	155104	189069	146661	185482	145805	190875	60307	68988	57140	73824	64144	60707	128978	151323	151460	131724	133357	158768	158432	140765	159916	157867	150965	146515	160847	151129	163711	150330	155969	164821	141031	130562	152919	121419	129156	151827	144719	165719	163040	159307	144971	141907	148246	131016	144350	106221	157004	146343
-4.68333	153121	155935	186799	153298	183309	143635	188376	59417	68575	56599	74127	63868	61112	128401	150326	151068	132872	137039	160787	158071	142158	159953	158991	152853	147490	159697	151031	164254	149638	157879	163183	142856	131271	146555	121782	129020	149917	144457	165810	160752	162349	140033	143696	142498	131449	144355	106141	156766	147105
-4.6	149362	157180	185087	147094	186301	145415	187201	60059	68869	56963	74346	63961	60860	131033	149538	152002	132864	134886	158485	157293	142896	162559	163520	148259	147484	158191	148753	163582	149084	158450	161179	142805	130396	146850	119417	126963	152414	136653	162333	164822	161184	143274	143294	144935	130018	145998	107423	156150	145443
-4.51667	149201	153186	185485	146917	183878	147230	186105	59504	68601	57065	73584	64325	60695	129300	150019	151602	131361	135389	156633	157905	144290	162299	157082	151918	149378	160364	149073	164976	148667	156336	161151	145018	129782	150476	123720	127532	151561	145665	162601	166288	155707	143985	144055	145178	128324	145028	105953	157262	144596
-4.43333	150204	154264	186835	146480	186805	149615	186524	60264	68801	57431	74696	64955	60481	127688	152066	149152	130465	135203	158994	155879	144554	163516	159034	152297	143373	156892	151339	168026	148031	157250	159378	142338	133465	145457	119415	130153	151853	142714	167314	164739	158087	142749	143206	142535	133767	144991	105483	156803	144777
-4.35	150088	153109	186258	151147	185460	141054	184075	60258	68887	57262	74537	64228	61338	132044	148289	148986	133794	134683	159305	158403	139937	163309	158851	151422	145515	158186	148367	164189	149744	156260	160441	142326	130579	147038	119009	127655	151401	139507	163985	166357	159052	143696	140550	145148	132058	144474	106902	154806	145153
-4.26667	150929	157332	187623	149460	182731	144242	186569	60682	69091	57104	74016	63955	61742	130717	150585	150985	133289	131856	158785	157629	141440	163375	156525	149573	147082	158352	150439	166581	149432	154926	159075	140979	129433	147392	119983	129844	151030	144130	162614	165794	157497	144471	144954	145042	132428	146982	105958	157343	146592
-4.18333	151729	151620	182710	150424	186098	143571	186379	59956	68912	57095	74197	64018	61216	129711	146621	150463	134690	133193	156322	155939	141772	161341	158331	147547	146267	161058	146374	165805	149234	152193	160284	141650	129306	150153	122460	130086	150115	141316	164336	161846	157527	143288	143590	147697	129269	145604	104638	157626	146651
-4.1	149293	156086	186312	148451	185762	142307	185358	60931	68770	56891	74942	64649	61323	128445	146915	146361	131997	136568	155465	159162	142253	160981	155701	149026	144479	153964	147777	166526	146486	155472	156961	139709	131242	150168	120771	129061	153483	145152	165608	164616	160366	146845	142570	143196	127701	146171	106146	159201	143457
-4.01667	153048	151436	184099	149217	186473	146666	184647	59762	68829	57439	74431	64651	61272	131152	145722	150005	130479	135285	155348	155542	138027	161186	157589	151534	144068	158581	144866	166003	150753	157117	159112	141098	128297	148347	115778	125943	150745	142787	163835	162472	162789	144317	143190	148916	127707	142579	107258	151743	146464
-3.93333	152216	153109	182553	145547	182951	146102	186824	60529	69344	57089	74574	64321	61465	129506	150118	149196	128668	131229	158796	156652	141072	161708	155851	150314	142675	153084	145461	161130	148237	160032	157873	143225	127294	148405	119560	126765	146451	143059	164320	161202	156889	146691	144783	146409	128462	144564	105540	156951	145038
-3.85	148876	155643	185994	148898	181287	144796	187433	60805	69226	57215	74969	64451	61597	129815	149231	147759	129110	133397	160686	153566	137733	157548	153156	152587	144295	155853	143473	163175	144180	152803	157341	140920	126156	146198	119318	130163	152879	140641	161789	164385	158711	139598	141115	141467	130409	142058	105284	155427	144939
-3.76667	152802	156776	185024	148587	183569	145862	184948	60597	69058	57372	75048	64816	61399	126897	150734	150300	132518	134144	156847	154783	139329	157737	156395	147635	143595	156489	144261	162329	146952	154833	158626	140652	128930	146716	120874	126019	153911	139463	161450	162818	160309	141814	140917	146308	128285	142514	105242	152209	143224
-3.68333	150741	156181	180403	143539	183667	142910	185310	60899	69142	57379	74335	64598	61718	129118	147071	148015	130403	130083	154383	154100	140032	159425	156591	144369	144782	155506	145239	165720	148038	153724	159314	137328	130434	147332	121479	128905	147617	146090	164649	163577	161114	146037	142498	144195	128804	142787	104813	158866	143852
-3.6	146203	153399	182948	147204	182820	141216	185371	60198	69716	57776	74947	64936	61720	126392	147424	147884	128323	132358	154529	154267	140038	159327	150094	145761	140968	150654	143944	162180	147236	153561	159352	141718	127020	149830	118769	126557	153097	144356	165834	163773	157750	144939	142178	146126	131304	139357	104841	155023	144955
-3.51667	152230	153247	182988	144691	182429	143520	186685	60465	68996	57493	74891	64751	61252	127879	150543	148844	128371	131458	152677	154066	140204	160197	151715	148508	142754	153200	146338	163476	147825	155786	156695	137803	126666	146659	121003	128164	150236	150214	164695	160978	158351	144167	141828	141132	129899	141347	104525	154521	144724
-3.43333	147073	151912	180765	143420	184082	139176	186725	60938	69785	57450	74357	65336	61603	126375	146285	148971	132081	131919	155282	152183	140083	160510	151353	146927	144816	153200	143384	159933	147107	154280	154923	140979	127528	145920	120971	127676	154161	141541	163807	161673	153901	145566	142104	147083	131565	142559	104911	155047	145729
-3.35	150410	151736	183256	145194	179970	147710	179601	60291	69366	57542	74512	64990	61823	128155	149683	147537	127386	131738	153707	156901	141161	154753	153051	149843	140524	153648	146605	160651	146716	154998	158807	139999	124976	146428	118509	128406	150480	145629	162799	162935	160510	142136	140759	146704	129338	144845	104649	155217	144012
-3.26667	149457	151598	177385	143753	182671	142924	185964	61411	69308	57562	74899	64867	62192	128444	148467	147841	130261	132186	157200	155336	138635	157502	152293	148606	142929	152375	143651	162077	144172	153492	158338	140078	127172	144064	117080	129260	151509	142586	164433	164153	158996	146050	140097	146654	127827	141449	104021	155589	140291
-3.18333	149731	151890	182694	147370	183307	143742	185065	61036	69251	57671	74622	65172	61373	128158	148640	148696	129687	128341	152682	154161	140880	157144	152212	146009	142867	153404	143706	159010	143991	150228	160484	138225	126760	146963	119324	128246	150023	141830	160928	161906	155723	145358	143320	145092	128151	139528	103934	153138	143825
-3.1	149406	151752	181872	144373	182304	143577	185682	60970	69323	57395	75235	64659	61375	125081	145063	150021	128735	133523	154810	151074	139742	155361	150052	145955	139997	151228	142956	157807	148534	156179	156050	140152	124639	143010	118803	123853	151020	140809	164477	161371	158120	145688	143990	141462	127426	139242	103879	155623	141857
-3.01667	144009	149771	181320	148327	178310	142706	186999	61425	69953	57288	74741	65361	62020	129029	146385	150824	128678	129946	153381	153782	138776	154800	150480	148550	143480	148801	144778	159824	142904	153244	158682	137550	123254	148617	116234	124909	151454	140461	164372	161426	154896	141134	137386	144977	126580	144248	103830	152251	139495
-2.93333	148420	152178	183141	143724	180184	141140	185727	60694	69643	57606	74568	65236	62175	125918	146293	149484	127757	132161	154977	152373	137254	157055	152792	145332	140538	150396	142614	154147	142843	154855	156156	140699	126404	143851	118615	124538	153223	141620	165809	164705	158350	141884	138930	145984	129860	143995	102930	153385	142304
-2.85	148194	152798	178576	143948	183328	140555	185452	60578	69287	57503	75045	64749	61775	129172	146747	146664	130736	127249	157227	152688	139331	156884	153301	148040	138797	151145	140556	160459	144746	152096	153907	138310	126049	146382	118968	123855	149710	140823	159639	159995	160250	144970	139889	141485	130165	141223	101940	155446	141158
-2.76667	149639	152003	182410	143211	177539	143000	183015	60624	69310	57539	75088	65305	62236	125020	150160	143232	127609	128711	154155	153030	140762	155395	152055	145342	141119	149544	140200	158821	142264	149930	155602	137747	125435	146621	116676	126468	148099	138496	162839	159445	160448	142913	139793	146729	133410	141194	102677	155839	140244
-2.68333	144497	151393	179203	141499	180358	141851	182764	61172	69769	58033	75133	64641	62208	128445	146408	145579	126718	127310	150901	154976	138211	156010	150847	144749	138012	150448	142346	160500	143681	152172	152716	140251	127746	143452	118280	123319	146800	143015	162567	163307	157696	140030	137013	144081	124749	139224	102427	154585	142047
-2.6	148625	153416	178498	145893	180641	144715	186209	60934	70187	57906	75333	65155	62288	127899	149635	144670	127260	130342	150583	153508	136762	156608	147806	142302	140719	149879	139779	159175	144404	151143	154849	137881	123546	144738	118972	124300	149024	143504	163165	160130	159821	142168	140401	146345	129924	141024	102918	154497	142658
-2.51667	143429	149867	181645	143497	179298	140041	186151	61090	69823	57470	75154	65412	62371	126452	145904	147900	129440	132237	152451	153098	136256	155664	147469	146392	141377	146006	142500	159297	146191	151897	154637	135923	124610	147451	118024	124308	147208	141667	162654	162404	161233	141905	139680	146524	128402	140483	102795	154234	139078
-2.43333	149059	152989	182253	142779	179554	142522	184537	61202	69492	57779	75779	65878	61616	125173	145766	145283	125389	129009	150646	155521	137029	154518	150832	139817	140066	149797	141811	154525	142030	149972	157563	136713	126126	142691	116123	125209	147771	141194	160234	162823	158385	144126	142850	143513	127766	140876	103202	155276	140806
-2.35	146935	149519	179325	143714	179647	142477	184508	61023	68840	57803	75206	65017	61844	124300	151276	144806	126360	127511	150678	155324	136543	153696	146865	141001	141979	147023	139567	161080	142611	152022	157732	138740	122881	143826	118354	121575	149013	140482	158135	159779	157552	141371	141664	147305	128599	138775	102891	151159	136990
-2.26667	144884	150663	177197	143180	176242	140621	180529	61021	69412	57204	75048	65208	62382	130411	145961	144690	129192	129837	152863	154693	135755	154596	153139	140752	140519	148466	140726	159603	143321	149348	152953	139021	124245	144217	115815	126191	149968	142504	160427	162782	158128	141890	140100	144354	127300	136835	102311	153583	139199
-2.18333	148311	151472	181865	142839	177413	141410	181972	61781	69917	57673	75217	65566	62003	125241	148691	145563	129249	123458	151459	150239	137337	153394	145916	141185	143221	149780	139740	159754	144607	148706	154734	138268	122656	142094	116062	129335	146545	141887	162618	163302	158688	143124	139018	145660	127204	140155	101870	152808	137832
-2.1	144765	150957	177243	142454	177624	142373	185301	61002	70588	57907	74468	65273	61703	128729	143736	149843	126140	128255	148288	149386	138565	154443	148696	141154	138836	145774	140318	154562	141251	151386	156235	135800	124309	140628	115406	123988	148165	143722	163818	161873	157717	142847	139373	146685	129650	140832	101447	152108	139733
-2.01667	147377	150209	177374	143868	176634	141256	185222	61186	70217	57577	74955	65031	61870	124058	146050	147664	127875	128232	151683	150497	135290	153206	147110	140324	141845	147282	139002	158870	141710	150186	150908	136606	123148	140218	119086	120045	146924	137672	162292	157245	157843	142966	138539	145080	128731	140549	101840	151838	138152
-1.93333	148987	153604	180235	139288	175308	139079	180735	61399	69634	58177	74734	65524	62287	124030	142493	144179	130127	127033	151861	152652	136697	153513	145282	142081	136928	146717	140671	156113	144030	151110	152174	133619	122712	144772	116344	125825	147822	144504	163603	162652	155149	140964	140397	145997	127468	140977	101079	150793	142740
-1.85	144014	148140	177906	140884	178294	141000	179013	60646	70095	57134	75008	65483	61867	127001	144854	145987	125187	127051	151916	151779	136477	154260	144739	142456	137504	148006	138358	156977	142309	148873	154318	137206	123382	146440	112984	126940	147563	141596	160576	162404	156077	142141	137762	144086	132076	141300	101300	149357	139475
-1.76667	141868	148410	180172	142796	177877	141496	181848	61229	69739	57455	75014	65393	61960	126417	144450	145119	126210	125076	148477	149785	136337	154513	146468	140952	137293	147853	141060	153764	140442	152326	154487	135866	123900	143270	116086	124441	145022	142377	164774	163310	158374	142449	138194	145199	126082	136912	101183	148323	136488
-1.68333	144991	149748	174128	141664	180790	139472	182609	60946	69932	57629	75031	65393	62042	126740	146937	146169	126536	124466	147918	153961	135070	151528	144567	141297	136057	146899	139628	156851	141073	149517	153399	136736	123954	139653	114540	124038	147253	142822	161277	160374	157400	141245	141601	145273	130621	137389	100596	149621	139471
-1.6	142134	145807	178089	144347	176450	140305	181089	60679	70295	58478	75202	65772	62196	122819	142661	143478	124381	127336	151627	150906	133343	152558	145319	139874	135777	141775	139341	155791	139979	149408	151666	132577	121324	145236	113795	126726	146510	139339	162667	160551	156758	142074	137572	144183	128093	138494	101374	150392	140077
-1.51667	144016	148867	178803	144631	178754	142559	179077	60843	70104	57839	74966	66002	61533	125786	144121	144080	123947	124177	148154	148831	135990	151681	144350	140936	137150	145633	137925	154321	140609	151109	153696	134114	122674	141677	117235	123366	144851	142849	160169	160742	156654	141346	139147	145106	127443	139280	100686	147837	138621
-1.43333	143494	147430	177197	138953	174874	141796	178116	61099	69549	57621	75034	65863	62901	126336	143781	140660	123899	125801	149191	150888	134996	151590	143898	139677	133968	143465	137503	154767	140099	147333	154910	137285	123248	144223	113555	124321	145051	142731	157595	161063	159003	140398	139883	143892	126318	136623	100170	150067	138701
-1.35	144846	148203	173803	139919	178096	141365	179666	61209	70314	57762	75428	65189	62405	124718	145705	145010	121958	127677	150596	150234	136516	147976	145361	141563	138326	142580	137628	153812	139094	144911	152849	131559	121826	142283	115177	123011	146686	144578	160620	158962	156164	141043	137816	145912	126806	139112	100510	151720	138819
-1.26667	143125	149728	172860	137784	174976	139695	181339	61662	69906	58079	74737	65641	61964	127939	144680	144059	123872	122554	146495	149847	138968	150042	145304	139424	137161	145706	140030	154016	142006	149770	149674	134259	122699	142582	112728	125901	145005	141284	163244	158547	157923	140119	139870	142614	126829	136341	99899	145132	138576
-1.18333	145471	148352	176705	144261	173535	139341	182705	60899	70292	57814	75121	65652	62322	125831	144181	144318	126165	124473	147566	149846	136881	150358	145331	138533	135958	144953	134875	155701	140001	145283	146351	134610	126145	144338	113569	123948	150895	142943	164003	155833	157876	141401	140106	143230	125692	140905	99350	146242	136225
-1.1	143001	149097	175575	139879	173160	140549	179705	61232	70002	57881	75281	65617	61967	125727	140614	146269	122349	124275	146236	147493	133984	148028	142415	139129	132098	143037	137277	152119	138982	145687	149061	133840	121288	141998	114474	123267	149651	140437	157999	158301	154154	139186	140716	141097	124569	138576	99475	152872	136956
-1.01667	143580	149644	175582	137744	175694	139189	179510	61399	69956	57772	74375	65990	62279	121791	141687	142433	123451	124984	146088	150725	137122	150892	143069	139116	137962	143443	135954	151240	138615	146794	148386	132329	121150	143658	117429	123621	143085	141876	161404	159804	159736	144302	138935	147681	125661	138536	100097	151566	135223
-0.93333	140547	147383	176326	140939	172718	140649	177433	61276	69933	57995	75419	66042	62365	124383	140451	143504	123450	122917	144797	149207	133849	148776	143012	141303	133310	143824	135733	155097	140897	145952	147707	131709	121120	142192	117244	122950	147180	139523	161665	158270	157806	143126	134642	142738	126772	139117	99774	148217	139181
-0.85	138539	146941	175211	141653	177461	137333	179509	61058	70062	58238	75396	66380	62546	123116	140299	143523	124644	121309	146282	150186	134929	149950	145502	137900	134953	143442	135942	154919	140887	149167	152714	132597	120140	143264	112702	125606	145549	138111	163198	160587	154292	142442	137015	141692	128584	137065	99793	148302	139030
-0.76667	142172	147578	174212	138861	175003	140828	178078	60871	69545	57717	75026	66052	62331	124215	143837	142484	121655	124039	146641	147654	133509	149464	142062	135631	132203	139376	133714	152277	142136	145039	149222	131043	121548	143063	113432	120975	149090	139816	160363	158340	153815	141960	134995	141887	123821	135569	99561	149199	140016
-0.68333	139402	148406	172892	139536	173767	136529	175761	61287	69891	57342	75850	65603	62198	122126	141790	142822	123788	122066	148258	147277	134907	147894	145082	133465	135040	143056	135357	152116	140521	144381	152922	133546	124079	141058	113938	122758	145702	140559	160221	159857	153369	139437	137804	143928	124118	137539	99208	145549	137370
-0.6	141416	145399	172820	139742	171598	139564	177729	61343	69479	57778	76278	65685	62130	124294	144168	139921	122244	124892	145106	150154	135737	147965	144301	134641	131941	139726	136446	152222	138610	144962	149409	132624	119809	141694	114307	125765	145268	141804	159950	158671	155438	141922	136960	145175	123995	142044	97947	148801	137804
-0.51667	142906	148030	171174	137928	170683	137851	176712	60945	70655	57958	74976	65947	62408	123550	142472	143429	123893	122576	146281	146315	137940	147642	140502	135215	134491	137687	137557	151798	138541	147620	154573	133772	121470	136852	114760	121624	145302	136872	159253	156166	151412	140198	135988	142634	121908	136267	98207	143660	137816
-0.43333	140653	144370	174706	142301	174277	138011	180304	60684	69930	57671	74876	65736	61917	120825	140451	142719	123489	123813	145573	147465	135066	148690	142315	135811	131698	139713	132660	149153	138093	147211	151004	135794	120402	140718	113004	123862	144895	137965	158259	156819	154226	140938	135408	143749	122190	134046	98541	149743	136969
-0.35	142305	148614	171241	141950	173628	139501	176460	60720	70037	58010	75667	65836	62341	120689	140850	142306	123071	123704	145380	147083	130690	146855	142359	136701	133739	137859	131715	150608	135683	144846	146574	128838	117910	139079	112304	123979	140952	139683	156897	159893	152873	141737	136100	144183	125644	135390	98053	145440	136239
-0.26667	143009	145836	174214	137828	176628	138390	183221	60882	69751	58079	75095	65881	62580	123255	147039	142709	122972	119843	144325	144658	133980	147305	141132	133102	135951	139539	134419	151113	138589	147414	146791	134625	119900	138712	112894	126102	143617	141718	159119	157519	153738	139594	137814	140329	125364	134337	98172	145341	137499
-0.18333	140837	144988	174030	137387	175033	138170	177873	60896	68986	57878	75152	65701	62270	121909	138790	139349	122460	118391	144899	145113	135138	146889	140868	133815	131344	138128	134119	151452	135817	150509	151010	132591	119666	138029	112041	122056	145104	136210	156840	156395	154945	139097	134112	142667	124661	133563	98548	146126	137959
-0.1	141958	145894	172504	136481	172645	138414	179331	61117	69724	58202	75149	66166	61691	123993	141932	139842	120686	121569	146661	144364	135102	143192	141239	134196	131244	137678	131642	151127	138122	148294	148420	133196	117097	142013	113675	120342	146675	138696	156390	158635	154933	142212	135887	141670	122272	133533	97891	148298	135618
0
0.13333	122764	126320	144940	122401	146577	123155	152065	53665	61732	49613	66943	56995	54220	108302	122703	123723	108130	107546	128317	127474	118571	126208	117468	118645	112839	120414	114954	130668	117651	128695	131095	115068	107074	122796	100043	108126	125268	120239	136746	140185	134351	125750	119372	123714	105952	118787	81516	120638	113796
0.21667	124245	129739	148233	125931	149480	123069	154069	53654	62019	49927	66688	57287	54645	107900	122381	121322	108946	107171	128555	130443	117532	125307	119688	113713	112095	121365	112594	130071	114756	125819	131096	113155	107129	121773	100194	111554	123871	121332	137479	139516	131042	124972	119249	126452	106579	115637	80531	121380	113209
0.3	121200	129204	145880	121944	151865	119769	155945	53959	62493	50284	66910	57670	54594	108569	123739	124393	108453	105550	126347	128518	118355	123311	118428	113508	111705	119206	116156	129114	116253	126542	130871	114192	105139	125869	99914	106289	124609	121261	136722	139836	134540	122180	121066	122270	105975	119788	80915	123387	111042
0.38333	125678	124740	145144	121673	146062	121267	153446	53558	62142	49951	67354	57864	54958	106233	119677	124037	106787	106297	128523	129508	116143	124869	118844	113921	112873	120560	115471	130953	117741	128273	131123	115926	107000	124008	99947	106390	122784	122152	139231	138964	136130	124532	118740	125806	107404	115782	80784	123896	116592
0.46667	126354	124923	146304	123233	150004	122232	152440	53874	62664	50410	66345	57667	55088	107460	124301	122150	111276	103915	129038	129362	117879	122414	118081	114599	110770	120525	114302	131939	115705	129051	132137	115761	106506	121899	100146	113048	123126	120743	137426	135275	135319	121853	120536	123685	106281	119505	81918	123164	116638
0.55	123408	128158	145743	122397	149414	122287	152901	53822	61791	50618	67403	57904	55983	105457	121311	125732	108511	106141	127813	128308	117442	123656	120792	117721	114195	120109	114042	129469	115540	129379	127991	112479	104615	123252	99657	105505	123897	123501	141925	139916	138506	123388	121996	125035	106973	114964	80965	126970	115608
0.63333	125274	124116	143448	123250	148078	121400	156017	53942	62631	50801	67590	57680	55310	107133	123227	125240	109037	106600	127376	132296	118529	126617	119754	119446	111695	119263	113563	129446	118044	129389	129963	113097	106468	124122	100023	108307	128372	120994	139039	136186	137651	122815	118327	126756	109056	115854	81267	126424	114742
0.71667	123721	128353	147917	122118	146891	123448	155113	53334	62101	50857	67622	57846	55113	107834	121709	125164	107739	105041	129642	132289	117752	124294	119124	124761	111994	120123	111684	129414	115568	129516	132268	115727	106519	123058	99144	108027	126100	119912	136809	136625	138850	125047	119540	124873	106292	117632	81581	121480	112599
0.8	122330	129189	145538	124488	149604	120486	154009	53796	63153	51074	68308	58323	55736	107129	123731	129360	107081	107174	129029	134558	118245	123959	119737	127065	112008	115514	113228	129207	117471	127630	132110	115000	104822	124618	100595	110377	123187	120681	137762	138090	135487	123495	120322	126219	108243	117132	81944	123263	116201
0.88333	125631	127681	144367	124369	147779	123044	155080	54263	63836	51781	69088	57941	56068	107002	121601	125540	105873	106376	131749	136216	118423	123186	119490	132997	111755	115404	114134	130448	117838	131269	134758	118225	106879	126494	101449	111012	126823	118489	136835	135774	137058	121159	118981	126904	106877	115734	81909	126071	115273
0.96667	124074	127094	145444	121811	149446	121547	155493	54343	63878	52495	69609	58180	57221	110953	123860	128569	106504	107776	129223	138471	118569	124679	118456	135672	113329	122307	112494	130509	119402	135744	141276	116320	106624	126180	101849	112657	125966	122919	138934	139182	140993	127693	121379	128847	106751	119365	83029	123620	115724
1.05	129159	128885	142932	123509	148718	122299	160764	54740	64417	53927	71387	58662	57632	109778	126029	131420	106389	106450	133508	140744	120631	124380	123351	141896	114625	119155	115167	132124	120492	136009	143753	115989	104833	123688	103686	109422	127291	119436	139310	140114	142019	123625	121397	132018	108189	117501	83609	130405	118156
1.13333	126883	128871	148924	122568	150313	120286	159080	54451	65647	55303	73361	58670	58026	109165	122684	134311	107473	107030	138604	146259	123575	124793	125342	142768	116180	121825	114702	135175	119098	138168	148206	119676	105669	123709	106136	112571	128317	122577	144068	142149	143072	123918	120462	129601	112727	116737	85085	129155	116113
1.21667	128988	126866	147277	122982	150236	122920	157305	55371	67115	56570	75439	58676	59758	111922	126573	135364	108393	105958	137704	151593	127753	126392	121008	147058	119338	122875	115503	136627	122569	140810	153297	124705	104545	128245	107627	112722	128796	119955	142823	137951	148456	126423	120950	132374	109432	119397	85769	133142	113231
1.3	129533	127672	149147	123346	152822	123225	160119	55749	68927	58247	77681	58741	60875	113600	127240	138928	107273	109173	145189	150467	128070	124480	128562	147015	122444	126964	112888	140857	125846	145466	155019	122921	107996	130038	109232	111591	131554	123245	147869	137262	153867	126241	122446	130245	112760	117021	87054	136669	113327
1.38333	133792	127832	150985	124327	152834	122602	162818	56719	69877	60221	80060	59027	62696	115930	126375	143516	109996	105834	149640	157240	128816	124592	131296	152037	125465	124963	114405	143372	128994	149774	158167	127120	106633	130736	109854	118402	128827	120642	151513	139560	152983	125993	122877	134430	115443	121632	89194	138191	116046
1.46667	131885	129157	154779	123339	153592	122603	164463	58177	72325	61286	82995	58822	63759	112749	129904	143487	110519	109124	155977	157669	133547	120411	134460	152392	128698	128282	113005	144900	127643	154019	164100	128521	108311	132337	110505	119687	136470	117883	152259	140811	158990	125566	121846	139565	113095	120587	90663	139171	115398
1.55	137605	128973	154794	127414	155068	124430	163461	58267	73875	62983	85204	59470	65934	118735	127908	148777	107307	110248	154812	162585	138631	125570	135561	154807	131871	129294	114744	148776	129261	156938	162401	135026	108777	134775	114529	118671	133581	120584	156373	147764	162445	124812	125200	136984	119410	126646	91991	142605	115712
1.63333	141177	130372	156590	124860	155723	122651	167346	60274	75721	64827	86837	59231	67517	120223	128761	150204	109836	111366	156450	162877	134720	123233	136167	158525	135724	135270	117479	151346	133846	157062	167824	135439	107355	136980	118266	123115	139776	124233	159933	144009	165027	124450	125140	143459	119566	129337	94533	147020	115202
1.71667	144200	134725	158016	126679	161274	127673	164885	61769	78097	66102	89159	60126	69978	122063	134314	149139	109379	112442	156969	166512	139585	121624	139536	153057	139378	138530	116277	152556	136543	160173	172860	138999	109560	138810	119076	127874	142148	124411	157863	150147	164164	125705	129209	143676	121473	131971	96834	150560	115815
1.8	146303	132780	160725	130324	158472	129614	172387	62003	79068	66868	91159	60234	71344	125311	138090	152875	108915	114998	158156	169869	144253	123514	145978	157788	141658	137790	116037	155621	135634	164122	170573	141980	109624	143066	120094	125997	144413	127144	159670	155161	168735	124209	129566	145983	124196	132394	97460	154492	116427
1.88333	148115	137609	163875	127633	165008	128197	173693	64074	80747	68235	93623	59751	73295	127513	140874	154848	111717	116144	163622	169716	148095	123738	143189	157322	140328	138937	120251	164232	141851	166747	173490	142616	113404	147699	121169	129393	143415	126603	167408	150775	171880	126328	129093	144674	127708	138113	99419	153493	112903
1.96667	149340	138572	167369	130918	166940	129952	175718	64944	83477	69578	94901	60204	75234	131562	142383	158877	111452	117475	164183	171763	150153	124185	143946	160175	144146	140923	121733	162144	143040	165679	174526	146820	115081	146647	124872	134916	148844	126692	170693	157798	171930	127118	133310	151850	125996	138582	100060	156303	116858
2.05	149617	138186	165789	137843	168377	131744	175967	67166	84986	70512	96406	60244	76169	131158	145505	156999	108786	118683	168346	170257	146971	126253	151075	161524	145157	144988	126291	163768	144434	170168	176555	145588	115468	148701	126717	132616	153546	128025	167596	160054	174859	129442	134393	155450	129389	138404	101429	154455	119198
2.13333	151775	137974	170936	135545	168550	135009	181318	67995	86755	71905	98199	61347	77737	135603	149871	162368	111215	121350	166467	174560	154273	125452	148477	161359	147430	146463	123482	167199	145464	170319	181610	148473	118813	151561	125963	139472	156142	130424	172373	159299	178451	129031	137139	158411	131086	141581	101969	159682	114176
2.21667	156445	142721	168234	135488	167875	137358	178789	69411	88027	72284	99772	61225	79172	136306	148527	164067	109731	124931	167764	178035	156058	124972	149102	164466	151129	147639	126657	166983	149109	172240	176144	153271	117670	155844	125311	137683	153798	130374	174815	163224	180056	130159	137855	156052	134822	143424	103225	161242	117684
2.3	158223	141800	171442	140602	171978	137449	187225	71021	88867	73043	99919	61977	80294	139506	149413	162880	114714	126412	168164	178391	153837	124839	155531	164098	152766	149616	130657	170299	147184	175084	177671	154150	122639	157710	126157	138433	158692	129794	171902	166960	178920	130406	138423	156521	137506	149328	104304	165704	119123
2.38333	159430	148306	167589	139950	174141	137749	186801	71758	91134	73386	101256	62674	81024	141357	153627	163435	117247	125759	171891	175302	158284	127454	151598	163645	151098	150630	128318	170148	151192	172185	177240	154753	123546	156220	130102	143587	156631	133028	175323	168965	181749	133627	140352	165282	137308	150219	104523	163082	114648
2.46667	152492	146382	169110	140195	175632	140426	187664	73100	91362	74269	101053	63399	81837	139266	155602	164161	115163	127801	171543	179265	153294	131119	154096	161469	154591	154552	132195	168651	150561	172646	182229	152629	125938	162598	133302	143457	160085	138254	175558	169796	181597	130767	144756	162789	137284	147146	104295	166317	118621
2.55	160773	147241	169736	142984	177187	142120	191708	74259	93139	74762	102199	64023	83906	141064	160018	167441	114657	129417	172250	181574	157157	130366	158945	162626	156224	154100	131409	171391	156625	173262	180216	156080	127519	162682	128840	142414	164453	137231	180559	172605	183673	135338	144603	165443	141071	149143	105420	168175	120845
2.63333	159516	151499	176813	141302	178301	141886	188341	74356	93673	75451	102891	64384	84767	144767	160337	166315	116214	132464	173219	177904	156270	129336	155729	164500	154438	157045	136277	169794	155027	174656	181619	157643	127763	161719	131303	147304	160432	138531	183049	177572	183428	133843	143831	165840	137521	152915	106718	165246	119977
2.71667	161581	149266	172948	144459	175435	143979	189224	75751	94751	75772	103485	65004	84861	142112	155988	168471	116459	134006	171495	178868	159252	129024	159326	160895	155044	158376	137476	173847	154576	173919	184512	158353	133229	164200	130955	143854	162536	143654	183875	177738	185865	136579	148023	166286	139877	153590	106024	167298	120721
2.8	163855	156331	174637	147268	180635	147159	192974	77598	95486	76350	104210	65584	85629	146807	161764	171398	119492	130335	175459	181439	155288	131093	160023	163474	160656	157349	136298	173738	157655	174755	181026	159889	129987	164993	130410	148831	165108	140534	183814	175967	188433	138369	149560	168001	142280	153198	106088	169011	121154
2.88333	162347	154992	174960	147927	180155	148010	190640	78608	96262	76432	104029	66188	87205	146919	164695	167952	120896	135052	174052	178653	162345	130780	160188	164922	159657	162977	141173	172052	158463	174468	185679	160823	133722	166417	131423	148612	164517	142641	180015	177079	182307	139641	152821	167660	143175	157178	106746	170853	123296
2.96667	166241	154501	176046	147682	182089	151554	190589	78647	97285	77154	104962	67365	87164	146400	164836	171197	121940	134197	174977	179263	160682	132108	158658	161137	161147	160412	139587	173199	158457	176808	184265	157813	135107	170085	132212	148175	165140	145554	185675	177206	187649	141998	152720	166196	142107	154807	106070	169965	123499
3.05	165073	157548	180971	150802	180625	153301	191896	79754	97417	77282	106482	67649	87525	145192	166210	167954	123911	137127	172846	177160	159717	136381	158394	163262	158367	161705	143018	177568	158982	175509	184338	163250	135989	167830	131853	150557	169768	146224	184222	178410	181145	144976	155585	170905	143811	153134	105717	169450	125230
3.13333	164168	156754	177501	149838	182445	156597	193345	80225	97317	77516	106859	68670	88073	142384	166852	170952	125797	139204	176053	176383	162019	135844	163026	163658	160143	157282	142495	173800	159069	180092	185940	159171	134943	169278	133077	155349	168091	148526	185420	183075	187644	143336	156946	170425	142267	155554	105656	168760	123982
3.21667	169821	156120	180658	151300	183729	154297	194966	80847	98078	77906	105306	69573	88696	146049	164091	172156	126302	136199	171256	180054	161367	134536	160756	163004	160324	161349	144751	175980	160815	180334	181114	159254	138862	168966	130558	149661	164458	149631	186399	179862	184135	145302	157777	171488	144661	160476	106351	169379	129337
3.3	167335	161021	178908	154367	182337	158507	193858	81062	99536	78136	105172	69786	89557	146824	165571	173724	124695	140031	172399	179260	163623	134638	161606	164843	156533	159466	148780	175992	161698	178122	183088	163222	138347	171874	133193	154573	167244	152197	188457	182825	185329	143213	154874	167023	144873	156220	106201	174083	129050
3.38333	165627	162935	185603	153259	182614	154498	199413	82172	99649	77949	106851	71059	90129	151277	164268	171660	129135	141137	174716	182661	163354	134998	161664	163329	155940	164501	146949	176542	158812	180946	186462	161941	139001	168161	130962	150872	167814	155401	185975	181946	180049	144442	154700	171243	147739	161098	107871	170447	129628
3.46667	166798	163718	183222	154931	183516	157215	198488	83172	99365	77979	106533	71539	90390	149937	167444	169031	127717	138963	176223	180701	166684	137690	161823	164652	157414	159775	148287	175816	159495	181496	182553	163963	141774	167889	130639	151250	171587	154101	184613	185332	186637	145578	159021	175389	146312	159211	107934	168062	131867
3.55	170200	163249	179330	160214	185463	155836	199019	83321	99766	78911	106993	72826	90902	146148	168253	171099	129799	138703	175895	181699	160844	138715	163759	164021	158831	160395	152260	175457	164863	175884	182407	161631	141458	169627	133728	151310	169638	155107	185907	185844	185379	148411	158532	173540	146417	155549	110121	170054	130846
3.63333	165936	164421	179467	160090	183893	156491	198560	83740	99902	79713	105375	73253	90969	148215	166660	172116	130574	140984	173961	181747	163319	144807	160879	164060	159953	162201	149559	175409	162355	174334	180637	160579	139008	170455	133869	153553	167817	155460	184398	187144	188017	154511	159904	170944	147045	161045	108553	171625	128375
3.71667	169762	165682	182373	162444	188340	161001	196702	84777	100923	79093	107177	74738	91766	149510	167348	172368	129300	140972	176830	181526	164180	139558	163742	164178	158585	162506	150568	179135	166169	176563	186250	162317	142943	169490	138637	155778	168707	154870	190174	186062	186459	150893	161482	177209	145295	159967	106061	168337	133603
3.8	167010	167765	179465	156967	182559	160426	195979	84592	100793	78580	107724	74908	91346	147632	165194	170789	131180	142285	175599	181681	163534	141857	160738	161578	160935	162422	152022	177619	162519	179468	182111	163313	140861	171486	134270	152432	167757	153615	187572	187305	184088	151910	162160	175380	147971	157013	107240	170733	130955
3.88333	165957	167416	181826	159485	183503	160707	196660	84832	101884	78816	107537	75763	92354	150291	166965	174528	133776	143065	177198	183379	162353	143776	160416	162898	158370	162903	151788	174302	164170	177134	185283	158431	144845	173214	132216	152811	170952	158187	188884	188461	183616	152357	160763	173671	145640	156336	108199	170457	135061
3.96667	169127	168111	181962	165572	184203	158307	195139	85222	100833	79147	106777	76167	91861	150121	165762	169338	135064	142805	175004	183146	164072	143572	163584	162537	157808	162757	151229	175121	163148	180637	185061	163296	143533	172262	132465	152409	170422	155588	185515	186888	188527	153979	165600	173806	146079	162641	108407	171444	137562
4.05	167866	167372	185667	162304	188954	161724	199362	85259	101591	79330	106165	77184	92118	149190	167475	172811	133121	145304	177633	181811	164002	141695	159723	163174	156810	165376	150988	176507	160052	178058	183074	165926	143374	173517	131545	155179	165406	158466	184412	188616	185802	154714	162239	174454	145127	160629	109940	172026	135281
4.13333	168617	170404	178767	164768	185150	162728	199819	85623	102114	79062	105901	78441	92027	151431	166856	171654	135956	145501	175898	181235	164837	145189	162673	164937	160672	162772	150561	178140	165280	178405	183478	164471	145255	173879	134679	158174	169640	156364	187501	186531	185403	153555	158468	171724	147037	159695	107744	168380	136298
4.21667	170620	165483	177318	159496	183989	162963	196211	86868	101493	79314	107335	78674	92894	147502	170200	171075	131897	143480	174739	177327	165859	146187	165474	166776	160030	161341	154116	176015	160168	176652	183178	164588	146966	175949	134359	153134	171130	159943	183846	189084	184504	156048	165106	173959	146750	162835	108066	170242	136994
4.3	166639	171663	182451	164005	187519	163815	195831	86679	102449	80051	107553	78207	92514	147277	166917	169607	136736	148151	177646	181789	163300	150966	161697	164085	157476	161954	153395	173708	166830	178046	183909	162964	144926	171971	133884	157009	169518	160393	186464	188148	186204	156504	164607	174953	149594	161919	109295	171418	138600
4.38333	171337	166488	181865	165460	185745	161320	198847	85757	101887	79311	107744	80012	92846	151428	167848	168179	137537	146254	171067	180466	161938	147181	162863	164991	162493	163257	151244	172597	166168	177258	184581	160902	144482	175126	136002	153475	169099	164863	184598	188496	185575	153583	161721	175380	146532	160660	108514	170618	139833
4.46667	169394	171652	182646	161755	183823	163600	196294	87053	101945	79759	108963	80920	93235	150163	170520	170624	138526	145197	174095	179704	161837	145231	162210	166022	158783	162283	152767	176828	165927	177749	186444	162435	143557	173177	134416	155689	165098	158401	187669	189829	187177	156442	164337	173602	146913	160173	105568	172588	139930
4.55	169320	171930	180289	164913	191412	163093	196382	86607	102721	78998	109971	81078	92492	150578	173030	173966	138604	144409	177095	181280	164913	148229	163960	162544	160942	161849	155608	178742	159884	176092	184667	164298	146591	174688	134589	154261	168919	164054	184705	186948	182905	158651	163695	176982	146251	159638	104723	168039	139266
4.63333	168971	169263	181815	168189	186012	168061	195752	87217	102699	79168	108591	81536	93139	152216	168034	170196	136912	143589	177020	177600	162513	152407	161236	161899	160784	160647	153046	175224	164247	177207	186757	163405	147327	174523	133889	154430	169346	160561	184816	192326	187989	156344	166075	173931	147012	155107	106892	172179	140120
4.71667	167826	171316	180243	161463	185541	164737	197182	86829	103511	79557	107744	83040	93633	150685	167066	170144	138635	148974	178444	180902	161323	151584	162208	164985	158901	163038	155946	176746	163715	176425	181680	166141	146741	172954	134604	157349	168570	162900	185712	188347	182335	158527	162906	177131	149975	160084	107360	168599	139420
4.8	168823	172550	182012	165524	185919	164554	199966	87799	103673	79906	106657	83313	93549	147035	171105	170181	137474	145119	176920	179731	165400	149769	162591	163906	159529	165101	158528	176965	163781	177348	182600	160646	145762	172951	132135	154552	167428	162872	184223	191620	187810	154347	164278	174078	148931	159798	106180	171668	139132
4.88333	166365	174505	182051	166642	188929	161511	198190	87700	102042	79306	107695	83397	93822	150576	167452	169189	141927	146215	175185	177836	160569	154611	162377	162815	157739	163915	152633	173118	165950	177740	184337	165117	144580	175190	131709	155139	166144	162411	188387	187894	185260	157513	163306	172401	150545	161885	109787	167911	142706
4.96667	167190	176000	181741	165243	184398	165640	198481	87670	102867	79535	106547	82862	94105	150095	168364	171186	137803	148218	173149	180635	168667	148990	162073	161738	162342	165307	158234	175426	165073	173819	183285	161408	146501	170371	134254	154553	166047	165496	181144	188071	184186	157929	165019	173146	148251	161479	108722	168083	142873
5.05	168610	176430	184005	166280	187214	166100	197396	87252	103743	79483	107419	84000	93694	151529	170140	172700	142462	144153	175876	179454	162798	153351	162039	162430	158237	161362	155676	172488	161929	180133	182609	160178	147965	169662	130522	158176	163458	163680	185774	187974	186198	160761	162853	172179	146247	160616	106478	170197	143309
5.13333	168329	175324	181046	167558	187053	166141	199578	87968	102795	79444	107233	84278	94057	146761	168546	166354	144803	147096	173207	178350	162497	154629	164611	159500	159275	166046	156172	173153	163678	178029	179703	161083	146515	176053	131540	155804	167139	164648	182983	187360	188670	162573	161586	170846	147265	160254	108523	170713	144817
5.21667	167055	172988	180244	163200	186864	166427	196641	88273	102779	79594	108462	85668	94097	149396	167618	172892	143535	147183	175034	180975	164449	154698	159254	161917	158985	159907	160068	172242	167196	175527	181374	163499	148701	170011	130615	152955	168434	163281	183023	187689	187239	161306	164254	173814	146927	159204	103146	168363	144831
5.3	166879	175130	179190	164890	191747	164358	197836	87821	103299	79463	106096	86499	94007	146891	173211	167389	139596	149174	175810	178737	158949	152397	162240	157625	156112	163532	154540	175092	164521	175923	178128	164684	148425	174400	135817	158456	167670	160721	182762	182904	186264	161223	164478	172695	147682	160864	108650	167805	145978
5.38333	170191	171072	180516	168017	187906	166225	197441	87886	104206	79652	108301	86221	94347	151436	168334	168593	137418	146117	174795	178130	161377	154765	161964	159968	159587	162704	159651	175529	159460	174282	177237	161404	147489	174253	133401	154562	165341	162455	183990	187666	182610	159874	165009	176459	149356	157279	107920	166669	145608
5.46667	165818	170030	180230	161731	180874	164167	196460	87942	103417	79209	107324	86394	93223	149829	164009	169518	143199	148338	171599	177182	160565	152544	163671	162757	157232	161338	154063	177878	165558	176498	181360	166717	148220	175306	130835	156029	169117	161457	186089	190166	183072	159119	159639	172182	145850	157596	106460	169395	143747
5.55	164756	174470	180750	169575	187523	166112	198729	87785	104144	80260	107719	86502	94238	152300	168409	171507	143266	146385	174168	179399	163298	157165	164197	160180	156666	161483	155028	175964	161226	173596	181740	162740	146745	173966	135892	156773	167512	162177	185005	186353	183859	156296	164729	170562	147590	160690	105506	169515	145381
5.63333	169167	170563	180382	168907	189522	163975	196931	89219	103510	79386	104575	87733	94393	150302	167559	170980	143632	144087	170674	175405	159049	154914	160928	158745	156704	160574	157564	173599	161796	175077	179748	162564	143166	173295	132850	156316	168293	163629	187154	187749	185170	161254	162608	173938	146112	161337	106821	167869	146900
5.71667	170834	171533	179561	167357	184676	167951	196129	88346	103273	78780	106017	88506	94053	149300	167283	168213	143264	145183	173107	175539	161137	155029	160843	160475	158512	162577	156157	174828	162097	174610	179882	163368	149803	173705	131873	153987	162273	163043	186697	186779	181406	161783	162549	168724	145883	158739	107810	168878	147277
5.8	166847	171547	183937	167133	187952	166131	196502	89024	103312	79576	109095	88144	94421	149973	167268	169812	140619	144540	173867	174873	159282	154115	159811	160229	159013	158713	154450	176342	162469	173709	184557	160620	146473	173502	133027	152946	168053	162495	182277	187653	183007	162165	162449	175141	143766	157746	104277	168019	144115
5.88333	168911	174630	178551	168331	186258	169663	197262	87975	102754	79413	106143	88723	94582	148879	168543	168473	143094	142197	171684	176246	163093	155818	157937	160561	157413	163195	154917	171205	164046	175734	180710	162383	145577	173773	131968	154566	164386	162200	183553	186834	186075	162508	160457	173843	147481	157900	107471	170040	146606
5.96667	166954	171325	179672	166131	184794	168840	198205	89405	103206	79310	109018	88200	94632	146361	169584	168019	144961	145037	170694	175655	159631	158114	158954	156974	158514	158936	153820	172232	161014	173492	180919	162449	147113	170860	131404	154448	164878	164883	182238	188254	184170	162747	163018	169606	145815	162081	104172	167220	148671
6.05	166249	171613	182316	166930	185695	165728	196777	88966	102615	78997	104974	88619	93391	149049	163246	169771	141199	146308	171690	174244	163461	154993	160899	157886	159564	163150	155161	174676	163058	171348	179163	160867	147820	169801	132494	153799	161277	163881	182700	186586	184472	161816	164180	174098	148813	156415	109097	167037	151329
6.13333	166843	169114	177920	167871	183847	166589	193291	88026	103512	79391	106115	88942	94401	147598	168989	168933	142591	145951	171718	179141	157438	155679	158417	159988	156409	157949	158348	171064	164485	171817	175657	162965	148080	173134	131196	155710	166775	164834	183356	186278	180502	160775	162173	177155	143336	158618	105915	170879	152621
6.21667	165486	174952	182238	166028	185184	167204	194422	88466	103806	79398	108287	88942	93989	147748	165487	166953	140297	144004	169314	176911	158714	156506	162410	158779	153010	162272	156798	167715	158973	170673	178400	161161	145328	172911	131564	154806	165905	158614	185454	184701	178510	162124	156764	170616	145911	158745	104846	169424	148834
6.3	166130	170825	182523	168326	185792	169871	195067	88660	103861	79835	107558	89245	93976	144836	167468	168502	140846	143364	167998	175997	161890	154555	157627	159283	157062	159442	155935	168098	160954	173967	178229	160035	144773	172454	131323	155143	163750	161862	183719	181188	179639	163921	161299	171647	143301	155656	105652	167316	148087
6.38333	165172	175067	184469	168297	180444	164661	199340	88383	103180	79477	105367	90147	94129	149640	167519	168280	141879	146471	168836	177254	160399	154165	158895	160764	154842	159361	155358	169159	159253	175997	178263	160586	148123	172426	130898	152167	161687	163899	181226	181216	178736	162925	160660	170366	147388	157870	106557	169212	147614
6.46667	162936	169518	176459	167188	181250	165598	194525	88651	102942	78514	106438	90361	93475	147082	167417	168964	142962	144053	167699	176312	161692	156729	156988	159221	154632	160890	154638	171536	158775	174461	180172	158037	145493	173932	128945	150110	165068	163246	180296	182698	182558	158356	161583	170952	144948	158484	105062	166218	147180
6.55	164525	171020	181470	166443	181014	166618	193480	88637	102705	78784	106190	90476	93845	147683	165117	166720	142368	143790	169358	173842	157598	153910	157800	157771	159084	162204	155887	167720	161527	171165	182750	164783	144025	173545	126678	153386	164161	161018	182713	184772	184898	162994	163713	171358	143252	157277	105409	165372	148806
6.63333	164830	170359	175250	168366	187000	163119	196977	88726	102655	78888	106892	90054	94206	147214	165968	165839	145590	145198	168396	176069	153812	157027	159036	157409	155404	158144	154437	172632	160167	172746	182113	162922	144828	170276	128809	152846	164831	162982	184279	186180	178927	161905	160759	168998	146482	157131	104332	168386	146699
6.71667	163048	172364	177217	166167	184393	167951	196349	87516	102506	79366	105646	90437	93731	143047	170718	169646	141969	140525	168121	176263	157330	154698	161398	155697	151753	160021	155893	171162	161779	172965	177910	158849	146492	169112	127490	150245	160595	161534	180002	183609	182255	163925	158959	168293	146088	154810	104948	164021	150265
6.8	162475	171985	178483	169079	184766	169601	192942	88525	103167	78767	106168	90338	93389	148061	167807	165999	141791	146201	171813	175502	158442	155505	160110	155299	153305	156752	154301	166443	161958	170582	176785	157044	146480	173496	132263	152458	165183	165456	179399	187114	181210	162404	157919	170165	144277	157796	104305	169398	148334
6.88333	166314	169257	179266	166246	184716	163918	196248	88642	102480	78633	105901	91034	94400	146136	168412	164978	144222	144711	169102	173856	155154	158348	161419	155632	152699	158059	156486	169472	160052	174462	180277	161796	143831	171796	129112	150275	162109	163922	182033	183928	180283	167224	162393	167338	140544	157138	105030	167243	148908
6.96667	161912	171975	177369	167285	181173	165393	194395	88694	103006	78905	104943	91312	93767	145577	168087	168683	145317	144604	168456	173131	154784	156104	157480	155869	153163	160322	154152	171857	157439	171774	180600	158093	145882	171491	128955	150534	162883	164945	182901	183727	181760	166873	160621	171805	145390	158065	104711	163672	149994
7.05	163619	170674	179739	167791	181854	166089	194587	88329	103513	78770	108541	91265	94143	146237	164226	162917	141892	146484	168124	172207	158161	155132	156022	153612	153558	156803	154464	168586	160952	168077	174705	161093	147315	171109	128400	152698	162210	160346	178807	182608	176712	162557	159350	169699	140484	159239	103488	164284	148749
7.13333	162885	174133	181325	168040	182061	165516	196229	88472	101531	78555	107986	91669	93343	145290	165005	166710	142680	142156	168930	170418	157973	159260	156449	155722	155421	158773	156694	171827	160025	169068	177333	159556	144206	171107	125472	150627	165284	162104	180427	183546	180580	161892	160167	166158	143311	156416	104337	163622	149758
7.21667	160219	176477	175969	165623	184331	166560	191307	88379	102049	78412	110072	91255	93797	145778	164859	166185	143497	142697	169911	170755	155588	156824	160487	153923	154165	156640	156348	167380	157177	173008	173506	160795	141690	170876	130735	145919	164452	160295	178041	183400	180582	161040	162849	170080	143988	157600	104566	163948	147277
7.3	165485	172029	179374	166581	182016	162728	192258	88627	102293	78711	105124	92369	93683	142555	163484	168270	143219	143094	164675	172436	158314	155637	159145	155228	151610	157996	153608	170575	157092	169229	179017	159863	143957	171127	127835	151836	159947	164252	179519	180228	179954	162205	156641	167196	141560	155703	104045	162973	149730
7.38333	166044	172414	176666	164485	182423	165807	195410	88784	102437	77960	106960	91462	93844	142385	166803	165477	144197	142008	166940	170394	154856	156938	157228	155878	154254	152997	153547	169404	159603	171749	177152	158369	146003	171587	128571	153984	160867	159119	176720	183291	181395	160220	158274	169748	142341	158146	104050	166148	146824
7.46667	162659	171498	176449	164484	181507	165234	195337	88073	102459	77870	105886	91474	92767	142389	163537	166592	143895	141684	169710	171070	157949	154213	159369	154153	153103	153779	157127	168000	156653	166980	178528	160638	146870	169261	128576	150329	159481	161977	180622	182208	179016	160146	157964	168178	142328	153922	103388	163888	149664
7.55	161681	171620	179566	159259	182489	166594	196813	88057	102233	78354	104164	91768	93056	145754	162523	165123	141677	142137	168174	173567	157021	153386	156253	154740	152583	160366	154937	170224	159118	168567	176319	156832	144440	172782	124194	149401	158057	162217	177769	182303	177682	161053	159305	168061	140007	152845	103809	166638	146209
7.63333	165122	170644	174884	166217	181463	164176	193861	88424	102302	78263	107108	92563	93300	145524	164424	164989	145556	139899	165912	174446	161501	158366	158092	154939	151609	157505	154444	167465	160254	167568	174864	156425	147410	170894	126731	151928	162168	161673	177327	182703	174699	164171	160059	167146	139722	154946	102625	162919	150046
7.71667	162839	172288	173047	165214	185397	165235	192885	87864	102128	77363	105124	92093	93182	144358	161675	165151	142696	140711	164509	172644	157663	156990	158512	157633	153206	159000	156001	168549	158761	170694	175407	158136	143271	167918	126134	151866	157987	163468	179335	181621	176138	162594	160173	165426	140551	156607	102427	164610	147939
7.8	163607	172927	172859	166229	182179	164021	189351	88259	102282	77886	106062	92082	93471	145705	163260	164286	141834	142553	169117	173436	153648	155887	160465	154387	153938	153872	154131	168259	158867	170759	176250	154631	144122	165495	126665	149279	156730	162958	178605	180696	176104	162090	159189	164734	141183	157614	101858	160184	146209
7.88333	160180	171105	176001	165901	184133	166556	193273	88569	102219	78339	105082	92256	92824	145874	164268	164040	143763	139724	169503	172017	155770	154666	158162	154687	152180	155075	156390	165333	158679	170975	171086	154295	146372	167452	127991	148226	160252	162079	175034	179459	181987	161725	157226	165907	138205	154411	102548	163372	149021
7.96667	162736	170641	173449	162916	180928	163061	192548	87692	102048	77840	106077	92043	92736	143995	161329	164782	142755	140214	166595	171555	155695	154683	153667	152635	152238	155556	154487	170321	156854	169120	173813	155579	141227	168595	125809	147881	157876	161506	180062	178599	175765	162466	157461	164884	141875	153498	102505	162320	150055
8.05	163737	168354	176130	163064	184006	164557	189158	87943	102025	77894	105705	92014	92637	143622	165594	161706	141897	140046	166295	170799	159406	153244	156027	154710	149967	154843	153564	164639	155913	167322	175816	156089	144680	168759	127353	151588	159221	163565	175441	178955	176494	163152	160222	166162	139375	157277	101713	159646	145123
8.13333	157050	174113	175873	161803	183543	163303	191551	87467	102043	77980	106948	91832	93030	144410	162751	162326	144518	142606	164080	172859	153244	156248	153582	154845	148270	155350	155041	165761	157474	168217	171612	156774	145008	168019	128089	149863	158804	158512	175420	180183	178300	161241	154763	164428	140873	156713	102298	161219	147169
8.21667	163861	168817	173424	165618	181788	165510	192978	88206	102225	77671	105813	92150	92993	144038	162143	161990	143366	139473	167388	171870	155621	153916	155309	154607	153476	154418	155309	164552	155046	166138	176238	155737	142438	165807	124108	149569	155154	159946	179043	178833	174904	161684	155829	162211	141896	151537	101403	162669	147664
8.3	162539	170747	178718	161884	181034	164913	191326	87583	101811	77933	105622	92629	92749	140292	162633	161473	145090	138036	169407	171143	157416	154192	153981	155515	148807	155998	154174	167312	156160	165599	174384	156089	144668	165462	125927	148112	159899	154387	173545	176525	173226	165197	158130	165419	139471	152184	101315	165909	148495
8.38333	160081	172805	172679	162982	179426	164056	190183	87048	101029	77545	105550	92654	92806	143945	166699	160093	142765	140528	166477	171279	155558	155267	158183	152763	151022	155799	156242	167620	160778	166409	172525	155794	142707	166878	126442	147383	155129	161701	175497	179552	175243	159468	157562	164253	136976	152599	101358	159574	147273
8.46667	158518	169403	177835	163859	181981	164897	189592	86692	100925	77751	105175	92092	92537	143339	163566	161900	144293	141707	163308	171707	152407	155763	154257	157380	148962	157393	153669	168269	156898	169296	178830	157157	140197	169935	127804	149730	154879	158298	175438	174584	174241	160253	154547	162702	141908	150976	100886	160164	148590
8.55	161013	172628	174039	166560	180702	161426	192794	87663	101535	77213	105513	92050	92667	141691	164205	163066	141975	139974	163848	170278	153115	156516	153938	152182	151230	155261	152163	167902	155112	167983	174447	155147	142758	165638	124622	151466	156332	157974	171211	177738	172857	160737	156886	163719	140738	151555	100285	162299	147902
8.63333	158964	170440	175059	164611	179477	164568	193475	87102	101196	77574	106346	92702	92477	141475	160476	161798	142224	140813	159181	169404	152063	153922	152541	152191	144867	151849	154367	165672	154875	163543	173960	154892	142848	165088	125402	149739	154991	159370	178612	179926	174173	158358	155714	163922	137915	152917	101178	162521	146522
8.71667	158932	170574	174360	163397	180625	163510	192105	87077	100649	77687	106049	92925	92229	143885	159838	165360	143734	138709	164628	169145	154273	155499	153320	151583	149221	156857	148979	167317	155192	166215	175987	156399	145994	163294	127677	150154	156435	157873	174551	181286	175232	158841	156881	166469	139171	152338	101363	162057	146618
8.8	160162	169656	173627	160152	181211	163019	190292	87701	100679	77394	104956	92332	91979	143388	161228	163473	142631	140605	163546	171271	151977	158757	153636	147819	148966	155941	150782	164265	154311	166404	172434	152002	143040	165779	126514	147269	152264	157595	170582	177826	171709	161399	155416	164555	136472	152398	99568	159656	148103
8.88333	159397	166927	177774	161829	179474	163302	188450	86798	100822	77207	106380	92485	91659	144001	161339	159766	141216	141093	162853	169095	155301	152808	152066	149414	148761	149614	152004	165925	154540								153023	159650	175481	174725	174872	161937	154145	164182	140100	150528	100554	159834	147492
8.96667	162359	169192	173651	162297	179116	163805	192322	86494	100653	77006	105250	91653	91845	137931	162591	163622	142019	142156	163042	172541	152007	154472	153697	147595	148546	152516	151346	161559	157272								155337	158158	173899	174369	174852	161924	155105	163235	138594	154021	99960	156818	144556
9.05	158096	169359	170980	165684	181272	162848	188143	87986	101105	77450	105518	92173	91989	141781	162371	160465	142899	142448	163006	167637	154130	156295	153083	151023	148306	149910	150405	164121	158643								153659	156278	172221	174927	171807	158778	152161	160155	139397	148157	99352	163003	145068
9.13333	161594	165527	173468	162402	182652	165762	190360	86780	101335	76742	105362	92548	91851	140577	158659	162761	142028	139002	164615	166343	153963	150545	152091	148511	147720	156122	154361	163954	156370								154621	160026	170318	176805	171319	160518	153968	161881	136504	153750	99362	159278	144766
9.21667	157221	167502	174608	164680	182979	162057	190068	86449	100980	77066	105433	92211	92129	141414	163842	162003	142221	140337	163622	169133	151280	151446	147461	150405	151590	153275	152629	164536	152898								151940	156130	173210	174399	171227	160627	153763	161381	137408	150331	99192	160404	147005
9.3	159179	170705	170256	160909	178359	165232	190098	86205	100526	76340	103730	93035	91369	143156	157805	160452	142434	139880	164225	166540	151996	153145	153835	151326	146756	153061	150759	164862	151947								150380	156747	169124	176257	172399	158478	155145	158494	135922	154153	98397	160832	144589
9.38333	157541	169063	170117	160660	178756	161721	187370	86702	99630	76481	103943	92462	91510	141505	160657	161405	137733	141183	163403	168293	153442	152900	150453	147294	149237	150039	152444	161915	153350								153629	153740	171819	178384	170936	157391	150203	158674	136365	147778	99179	158785	149579
9.46667	159046	167659	168224	164033	175551	164063	184289	86311	100388	76317	103883	91722	91306	140689	158380	161341	141627	138802	162605	166290	151361	155335	153427	147354	144629	150842	152917	164441	155607								156680	155267	169514	175300	171156	158401	149725	159867	138883	154272	98170	157305	145964
9.55	155542	165264	171034	161499	177341	160922	189045	85902	99863	75699	105339	92319	91555	139487	162533	162458	142780	137318	161384	169489	152393	154090	151524	149047	146909	153493	148844	167379	151855								152193	155401	170127	174733	173482	159604	150594	165491	135430	148286	99264	158775	144099
9.63333	156042	169071	175081	157654	178707	161419	186854	85556	99823	75419	103628	92523	90926	141302	159854	160623	139516	137628	162860	166751	152087	152156	151529	145259	147648	149207	149529	164575	152757								149522	156097	171076	173640	170875	159811	151492	164115	135525	150314	98749	154616	144946
9.71667	153600	168155	172270	158907	179294	161963	186511	86252	100560	77142	104433	92096	91026	138313	160840	162169	142019	137787	159693	168052	150408	156968	149298	150020	144125	151895	152461	160136	150333								149077	153948	167877	173836	168231	160339	151158	158656	133744	149989	98628	153136	146926
9.8	153377	167293	169764	162633	177487	164200	186438	86206	100269	77398	104055	92670	91104	137210	160289	159304	139357	136935	158891	165454	150038	154065	149303	146578	148766	151703	149300	163357	150301								153075	152944	168203	171372	168174	158339	151493	164265	136180	151144	98323	156360	143839
9.88333	154962	172348	173793	160322	177663	162536	186324	85881	99393	76222	104353	91531	91684	139123	160841	158758	141780	135652	161676	167343	150515	155453	152116	148329	143676	152590	146359	164553	154914								152161	154420	167863	173406	171076	156890	148009	163213	135603	147830	97657	158474	148158
9.96667	159774	165301	171565	159982	176202	161613	187208	85752	99893	76002	103632	92539	90831	140293	161791	157744	140905	136036	160238	167909	150731	152933	152101	148225	145172	151678	148918	159546	152370								152499	152673	168726	174462	172761	160708	150768	161172	134664	147380	98024	153532	144777
10.05	154689	165181	169314	163490	173845	159483	186261	85981	99952	75686	102867	91486	90881	138352	155660	159009	141252	135067	162091	163983	149169	148379	147794	146413	147089	149605	148904	162343	151114								148111	152770	170013	171794	169488	156888	148735	158392	134709	149218	97630	154425	144743
10.1333	154758	171622	167191	158978	175932	159252	187381	85340	100104	76067	103616	92854	90823	135242	158224	157228	144342	138105	162697	165013	148058	152066	151847	147778	147388	147939	148252	165110	151687								154136	152837	165776	176355	170814	155160	149339	159156	134570	147293	97561	154662	143527
10.2167	154776	164002	169243	161443	179385	157916	184619	85892	98703	75589	103559	92008	90613	137570	156613	158415	143100	135521	160542	164310	149344	152853	153015	148408	144448	152516	147933	158477	149755								149420	155436	169654	173080	172878	160845	154535	156293	130766	146051	97157	158851	144631
10.3	158289	166835	171561	160862	172898	162359	187603	84921	98760	76035	103576	91744	91179	135896	159695	156748	136334	136282	160040	166721	149438	155949	149097	147371	144027	152757	149717	160848	152037								149805	152232	168855	172468	165755	156478	149070	158780	133528	149480	96885	153707	145707
10.3833	154474	166774	170714	158222	177016	159203	182914	85494	99590	75471	103316	91007	90859	136693	154646	159222	140251	135869	159495	164260	150493	151112	150213	145193	143648	149588	150403	159325	150082								146097	148480	167228	173476	168095	157101	151094	153893	132324	146870	96657	154462	147316
10.4667	153882	162883	165728	159767	177124	161622	187812	85395	99234	75313	103926	91936	91410	137542	154986	159962	140883	135448	155762	168471	151085	151542	149464	146776	146462	145390	146704	160770	151711								144638	150144	167474	169762	169322	160331	150193	156759	137756	147313	96828	152263	144232
10.55	156031	163915	169572	159537	179966	156475	183343	85143	99234	75414	103624	92095	89499	136752	152294	155729	138722	134894	159635	161546	150856	151723	150708	147798	146059	146142	146530	158875	150156								145091	150684	169491	169592	163524	157376	145897	153936	129280	150845	96557	155212	143347
10.6333	151733	163544	165038	161155	172457	158893	186315	84798	99368	75566	103480	91894	90505	132493	158350	157160	139569	135777	157550	164248	150441	150138	148404	147464	146197	143919	148337	161568	150222								148695	150570	167303	171999	167930	157599	149211	155196	133303	148307	96449	152136	142891
10.7167	153451	167944	164840	161030	177004	156496	186932	84928	98865	75454	102840	92371	90212	135017	157591	158852	143345	137639	160245	164058	150619	147177	149314	147027	138338	146880	147052	157757	151063								146593	152020	168159	169358	165404	154323	147147	155470	134836	148580	96451	154105	142069
10.8	152955	163743	168985	162251	174839	158289	184370	85085	99097	75348	102380	91306	89780	133970	154649	155191	141482	133576	154396	161466	149175	150030	151292	145144	143847	150698	147895	162129	151911								148636	152152	171069	169755	169281	158956	147423	153576	133492	146625	96216	155285	143017
10.8833	155430	164802	168403	159574	172673	157742	184935	85460	98232	75413	102875	91209	90393	136997	155310	155786	138020	134374	159415	164996	149784	151989	143976	144922	144684	150385	149743	159719	147631								146759	150478	167608	169021	163574	156564	146098	155453	133589	144298	95937	153258	143831
10.9667	151733	159094	164963	157992	176892	161275	186195	84937	98467	74986	102708	92021	90202	136900	154179	154734	141433	134889	158471	165604	146780	151319	148963	143799	144786	146731	148011	160647	150298								148450	152589	166075	170283	167189	155556	148089	157048	133908	149352	95005	150048	140974
11.05	155440	162330	166781	157930	174108	158445	185784	84447	98891	74804	103123	91753	89450	133690	153625	157200	137758	137895	156727	161085	146265	149876	147796	146974	144280	146740	147236	160915	147739								146605	149449	164508	170935	166182	153582	145464	158405	132408	144716	95262	154273	145875
11.1333	152449	164270	167868	158064	171574	160893	185520	84989	98361	75145	102588	91615	90120	135853	153712	157765	139006	132496	156082	159898	150662	150167	146198	144937	143552	145568	145005	158226	150536								148658	149504	165127	170038	163940	152965	145875	151745	132500	146258	95532	153031	143108
11.2167	150770	163220	167777	160805	172714	158043	182190	85224	98604	75037	102274	90994	89882	134582	154914	157261	139375	132321	154961	162161	146854	153891	147869	145625	144250	144525	144598	159947	147980								147828	148394	166366	167916	163101	157072	144466	155927	132223	145833	95299	153774	142703
11.3	150683	164754	166825	159908	173379	159670	181377	84739	98377	75160	101921	91531	89625	132317	156633	155140	140060	131622	156214	161536	145540	151015	148343	144100	144367	144854	148468	160516	147238								146586	149936	165424	169660	163599	151562	147044	154531	128575	146587	94506	152947	141152
11.3833	151619	162855	162952	159688	173099	157217	183002	83767	98751	74616	102373	91320	89337	135438	152571	153574	137467	133509	157887	159992	145299	150648	145803	143741	142812	146403	146578	157471	151123								144563	152884	162003	167453	164153	156126	143743	153397	130522	144426	94221	154142	144082
11.4667	150662	162127	166265	159298	175638	158800	181690	83914	98133	74954	102243	91691	89230	135358	153839	153692	136141	133555	158398	159385	145628	150187	146832	143223	142474	141419	145452	160415	148970								148423	149210	163928	168357	160525	156191	145845	154072	132028	146332	94776	154954	142623
11.55	149078	158060	164815	156258	171721	156405	181994	83364	98005	74345	101199	91444	90387	132550	153814	153587	138872	133275	156352	162348	144790	151080	147154	143035	142356	145670	148503	156446	146375								145054	150303	160918	165884	162958	154921	144466	149967	131927	140267	94231	152289	142879
11.6333	150698	162721	164166	153514	169313	156414	178749	84634	97532	74954	101512	91190	88951	132632	153680	156103	138182	130523	156901	161446	146353	151494	146122	144754	143273	142805	145145	158729	148006								142263	147270	165832	167391	163245	154974	146346	151868	132887	144655	94698	152372	141280
11.7167	150005	165277	164767	152576	173126	157797	176685	84528	97744	74702	102181	91111	88448	131866	152067	150526	137505	129774	154460	163018	143418	147986	145681	142456	140827	143296	146921	158138	145683								145516	148309	162031	164982	164251	155659	138267	152656	129420	146079	94140	149692	142078
11.8	151814	164033	165445	155664	172179	158574	182121	84000	97694	73536	101388	90782	89302	132880	153205	154231	137006	133434	151848	159539	143069	151768	146427	142030	141964	144412	144407	156447	145593								141460	147334	163211	169325	161199	151766	142999	153249	127445	142564	94460	149707	143003
11.8833	148572	161864	164820	155123	173995	157171	180619	83414	97834	73263	100646	91843	89293	135445	152024	153170	136111	130551	152157	157383	147404	147734	144649	142833	140011	145003	144420	158495	146007								143122	148920	164273	166639	166455	152476	143688	152944	127001	142968	93427	150299	135484
11.9667	151066	159332	166125	157001	171398	156561	180859	83581	98006	74238	101407	90833	89476	135603	155210	150718	138903	130951	153316	159101	143275	150805	142450	140869	140722	144546	147177	156419	143928								141544	149077	160248	166869	164537	153374	143786	151797	130355	145001	94164	153340	141053
12.05	150970	163637	164651	155438	172591	158042	180188	83987	97091	73816	100143	91104	88717	134188	151502	153269	135427	130507	155385	158470	143978	147996	143535	143024	143166	148401	143876	157742	146785								140830	148176	161442	168065	161106	148999	143894	152861	126974	140822	94188	150098	140146
12.1333	149783	158635	166010	155131	173366	154313	179463	82928	96395	73823	101028	91057	88519	130043	151503	154686	138952	133798	153327	160551	145068	148308	145140	140033	141858	143114	141707	155919	146390								142427	147955	163044	165480	161826	156248	141830	152383	128048	143616	93122	150576	138126
12.2167	149189	163814	163321	155782	173733	154712	179253	82849	97126	73814	100996	90856	88564	132422	155021	151795	139055	132378	155325	159821	144092	148166	146591	142138	142326	147462	142447	153990	145420								140316	147699	163278	163952	160009	151856	139713	152297	129809	142730	93556	150180	139586
12.3	146110	162320	161110	158063	170182	150188	178663	82943	97668	73854	101134	91290	88010	130262	152280	152739	132870	129544	151618	161090	147258	146748	143968	141432	140329	141548	144336	158725	144470								143051	147342	160114	166357	161543	151801	140868	150118	127777	143131	92637	151136	139547
12.3833	148069	160516	163005	155034	170635	155987	181534	82881	96338	74246	100623	90663	87682	131565	153378	152896	135379	127944	151261	157594	139751	146135	143221	137920	138310	144546	141592	155136	147339								142537	141604	160916	165004	160893	149216	143266	147688	125252	140994	93279	151593	137505
12.4667	147065	161500	167130	154325	168035	156973	181852	82443	96848	73831	100921	90218	87104	132711	152068	153909	137381	128097	154123	158337	143083	147765	146311	139239	141906	142439	142922	154954	143580								140126	144822	160632	163608	160226	150263	142386	152498	128167	140587	92494	147473	140334
12.55	144151	157682	163714	151680	172013	157618	178629	82846	96510	73550	101305	90768	88000	131170	150812	153197	134920	130162	157859	155124	145334	146925	145297	141562	137104	143269	144507	159605	142939								139314	147657	159885	162952	159645	145995	140258	149432	125707	142021	92804	146493	138655
12.6333	149522	160793	160231	150770	167699	155216	180477	83006	96289	73165	100390	90406	87533	132051	149363	151672	135118	131755	150304	156434	145004	148134	141648	139338	140321	140786	139080	152173	143914								140476	141746	159970	167214	160021	150696	142615	152240	127057	142102	91838	148254	139070
12.7167	148325	159644	162916	156238	170230	155359	175840	82279	96764	72904	100223	90186	87777	130723	152420	148752	136299	126089	153805	157802	143747	146224	143883	140722	136509	144806	143693	157180	146006								141410	144972	162962	166150	159766	155308	140192	149002	128453	142606	92455	147529	138329
12.8	145509	159010	159571	151640	167993	155318	181636	82592	96480	73393	100276	88990	88306	128751	151677	152002	135485	127494	151847	157185	139622	146794	143540	142491	139320	142426	142759	152997	141356								141573	144393	161840	164300	160925	151899	138936	146961	123616	140347	92611	146445	138554
12.8833	144061	160050	163519	153130	167845	150304	181617	82079	96118	73443	99963	89275	87103	132901	147309	150956	134338	128185	150024	157848	140934	145847	147239	141176	135250	141039	142143	154875	142687								140544	144976	159522	164749	155632	148398	140109	148050	127390	138904	91472	151341	135830
12.9667	150342	157025	160924	154303	171837	154273	174313	82167	96539	73470	99325	89898	87215	129829	150993	150769	134900	128623	150634	159530	141720	142937	144435	137913	138561	144752	141467	152752	146925								141979	146630	162087	162242	159660	149313	141681	146530	128112	139315	90994	145453	136829
13.05	145510	156431	163475	156729	169353	154644	177772	82558	95986	71873	99000	89389	88180	129151	151254	150063	136468	127673	148396	159411	143516	143927	144063	136584	137198	139801	144782	153352	140936								139672	144180	161312	162721	158013	149684	139859	147298	126979	140060	91463	148797	136822
13.1333	144603	160326	158656	154095	168366	152167	176211	82668	95461	72738	99860	89893	87574	126811	147605	152107	133697	129928	150603	155471	141679	146022	141009	135886	136325	140490	144396	151059	144381								141678	144419	159824	162646	154744	150489	139558	147394	124948	136138	91459	149724	137085
13.2167	147852	161698	157948	154017	169411	152332	174281	82040	95751	72225	100057	89718	87007	132818	151592	150361	135319	126798	150638	156391	142484	144256	142824	142636	138444	143132	140933	152550	143504								138329	143308	158525	162825	159988	148710	139048	149474	127201	140380	91767	147515	135585
13.3	143821	163612	159868	150756	167782	155857	176253	81728	95867	72661	99213	89592	87823	129515	148676	147678	137428	126118	148005	154954	140522	145399	141880	142296	136206	141294	144000	154860	140789								135037	142566	158965	161978	158208	150195	137303	147327	123911	141008	90866	148347	135443
13.3833	141774	156478	161099	152564	167898	151869	178179	82146	95827	72853	99400	89821	87003	127014	147471	150474	133194	125953	151953	156629	140951	146870	141614	138468	138455	142694	142402	148590	142026								138405	144059	157447	159924	157749	149535	139844	146291	126161	140342	90348	146665	137546
13.4667	143398	157885	156698	152724	170944	152466	175166	81927	95337	72650	99421	89666	87050	127747	148636	150751	136626	131140	149297	152308	142438	144819	141838	139220	138444	142105	141988	152522	141289								140774	143049	157657	160918	155092	148387	136752	146908	124262	138545	91255	144985	136568
13.55	144235	155020	157828	154927	167657	152370	178499	82134	95247	72836	98250	88569	86523	125874	146986	148026	131036	131145	150151	155238	144058	144211	146181	138231	135273	139475	143025	150839	140958								139036	142462	157119	158785	157617	151354	137314	144633	123682	140343	90680	141323	138752
13.6333	144646	157341	157211	152564	170514	150780	175601	81627	95616	72600	98246	89788	86408	127128	146906	148162	133917	129792	149595	155513	139049	143350	142505	138373	136710	139333	139028	153951	142490								139024	145199	158526	158551	161072	149818	140940	145284	123325	137176	90513	145630	136082
13.7167	143925	157253	157919	149511	168556	149654	175353	80938	95321	72561	98418	88523	86471	125490	144569	146263	132233	123118	149470	153018	141009	143661	139787	139243	136460	142240	136890	151212	144895								139262	141997	158809	163580	155928	149282	138361	146668	126165	138479	90486	143819	136158
13.8	144488	156106	158181	150951	166870	150351	173308	81724	95558	71909	98419	89187	86908	128679	147697	152458	132202	127376	147218	152222	140789	142536	138947	136115	137439	140308	138702	150299	144161								139344	144566	157783	159354	155101	149204	139037	147109	122586	137503	90430	146648	136857
13.8833								81173	94675	71979	98735	89467	87185	126328	146651	146196	129384	124969	150425	153735	141108	143264	141405	137917	134881	139267	138096	151723	142380								135923	139617	154895	163041	156075	151417	137256	142629	122655	135377	89436	143976	135670
13.9667								81383	95104	72097	98417	88971	86347	127875	144476	149760	131731	123517	149816	154498	141665	144948	140921	139464	131391	139925	140729	151375	139646								139330	142347	156415	160799	159073	149387	137106	142494	120819	138811	89687	144424	134996
14.05								81490	95297	72381	98600	88730	85611	128668	147158	147717	130854	125704	145645	151623	143306	145064	139703	136368	136039	138372	142630	151704	138569								137975	145217	154006	162075	154177	144609	135907	145804	123686	137315	90294	144667	134083
14.1333								80561	94659	72321	98357	88757	86540	127627	145019	148966	133953	124621	145196	153422	139245	143124	136206	137646	135185	139416	141403	155512	142517								136696	139616	155512	159129	154020	146023	136364	148820	122147	136563	89384	143202	133287
14.2167								80557	94454	71401	97353	87894	85718	129254	148079	146976	133417	122483	146536	153423	136873	141218	140941	136537	137872	136363	138217	149016	142439								138420	141967	154589	159381	151909	144914	135336	144321	121872	137791	89096	144057	136019
14.3								80675	94409	71594	96921	88184	85380	125689	147876	150653	135345	124660	144817	153738	138713	141763	140240	136945	135390	136209	134583	152817	139402								136082	140446	157541	159304	151787	144354	137394	142833	125071	140824	89867	141372	130166
14.3833								80946	94056	71646	98758	87814	86169	124114	144034	147768	131228	125000	144382	153350	137774	143910	143221	137390	134591	139955	136743	150256	140579								135347	142597	159993	156057	159162	146713	133820	145573	121413	138843	89170	143615	134161
14.4667								80885	94588	72145	97875	88489	85856	125133	145530	148168	133443	123767	148953	154818	137699	145160	140171	138145	135842	133830	137335	151769	141363								134592	142799	153835	159423	158118	144747	134343	145593	121209	135592	88676	144301	132685
14.55								81016	94687	71266	96842	87465	85166	123686	145363	146516	134547	124310	144849	151784	137099	140960	140645	133325	134596	139144	135898	150638	141258								135002	138371	155392	154997	152384	145845	136004	142042	120233	138780	88823	141551	135663
14.6333								80619	94477	71884	96771	87761	85339	124271	140778	148177	130180	125801	144071	152244	138626	143604	140421	134325	134147	137311	134482	150192	138523								134238	139759	150666	157732	154127	144473	136781	144217	122413	136145	88451	142477	134399
14.7167								79968	94378	71437	97424	88009	85613	128159	146879	147072	131642	125769	146069	153821	138564	140996	139263	134779	136777	138067	134346	150207	135464								131619	139000	154110	158963	155156	145778	131481	143388	123435	134639	88532	141713	136060
14.8								80238	93671	71342	96230	88135	85171	127043	141901	146781	132021	125193	143848	152384	136788	142095	140049	135103	135577	135225	136842	151191	139061								132015	140183	153432	158701	152090	143603	131599	143846	124014	137252	88970	141506	131793
14.8833								79953	94116	71215	97259	88192	84681	126467	144951	148145	130552	126117	144096	149053	135263	140368	138622	135207	135301	136417	137249	148143	138348								135495	138512	155777	158191	150109	146418	134252	139089	120057	134358	86864	145346	131044
14.9667								80144	93680	71026	97236	87619	84735	125306	142867	146700	131628	124183	145817	151987	135581	142190	138274	134053	133836	136166	134740	148040	139113								131617	138250	155272	157859	154670	144269	131752	140272	118069	135370	87024	141613	134800
15.05								80014	93884	71648	97087	88242	85917	126335	142408	147461	133661	122836	143640	151757	134696	142754	137852	136530	134352	135154	138131	146842	138122								134639	135698	153532	155018	149674	142579	135840	144020	120569	135922	87763	140303	133389
15.1333								80113	94633	71162	96334	87974	85533	125344	141007	145361	129086	122332	143164	153046	139671	141401	137448	132579	131611	133411	135846	148913	137035								128870	138837	152128	158662	151071	143407	133463	142836	121310	134998	87529	141374	132649
15.2167								79747	93278	70941	96161	87603	85283	121622	143360	146393	132059	122980	143856	151758	136391	140582	138583	133886	131245	134960	136912	149100	136695								134417	137104	150286	155707	147279	142789	132568	140704	120252	133779	87610	140761	131813
15.3								79966	93701	71381	97402	88029	84645	123485	143479	145573	129380	120249	144783	154443	136317	143508	138078	135111	132461	137530	134950	146519	138006								132619	135783	152344	156542	151895	144759	133211	137707	118933	134933	87655	140447	131844
15.3833								79877	93564	71097	96347	87692	85315	123377	141393	144946	129977	121047	142939	149235	137988	138352	139959	131089	133296	134817	137136	148570	136850								133205	136634	150415	154522	152408	145176	132895	142158	121480	130905	87151	141204	133423
15.4667								79417	93144	70834	96520	87845	84706	122373	141507	143877	130725	122256	143186	150964	136769	142596	136568	132560	133067	131765	137547	145090	138650								131424	137525	151859	155871	150437	142917	131111	143230	119396	133189	86554	140654	129525
15.55								78942	92898	70182	96025	88143	83979	123889	142933	143684	129979	123347	143190	151262	134630	144413	135419	132696	136529	137917	137074	146976	135558								130967	133981	156659	154809	150272	142560	131778	139324	119583	133617	86789	140622	129538
15.6333								78909	93049	70634	96332	88402	84394	123127	143894	141446	129472	120519	142203	150572	139169	139488	137617	131098	133049	134509	135778	147477	136291								131871	137491	152109	153635	152639	139910	131437	137916	118602	131511	86068	139846	131916
15.7167								78933	93036	70684	96355	87377	84206	122554	139097	140777	130121	122954	143392	151070	132950	142750	136413	134033	135436	135095	136599	144684	136029								130743	135412	149014	153972	148359	145713	129643	139592	119336	133918	86599	140813	131820
15.8								79741	92697	70186	95767	86840	84597	125547	145525	140808	128998	122135	139349	147926	137449	140831	136883	133782	128901	133217	134809	143157	139061								131816	134902	149021	152807	144762	142359	131316	140873	118369	134106	86472	137399	133035
15.8833								79513	92330	70225	95003	86392	83898	125047	140238	141810	127240	122075	143427	148076	137552	139708	134496	132394	131000	130790	135551	145545	136391								128832	136141	148579	153067	152912	142836	130218	137988	120606	134229	86948	139999	127720
15.9667								78841	92198	70868	95361	87501	84355	124239	142898	141492	131915	120489	139494	152186	135217	137590	135492	131551	133825	133752	135669	145544	136083								128676	133935	149981	151995	148972	142838	132417	136814	120140	131031	85629	141334	132636
16.05								79061	93344	70020	95733	87116	84437	120588	142611	142707	129600	121237	142460	147793	135479	140817	135198	131148	127759	131715	134464	146837	132717								129746	131618	148984	153562	150230	140544	129710	138509	116313	129437	86421	138233	130277
16.1333								79430	92654	70266	96100	86869	84072	124589	142951	144286	128252	118738	140668	147605	136355	143522	135082	130133	131615	134514	136553	150440	133803								128520	133541	152299	155121	150364	141882	128573	136051	118781	133615	86177	142248	128119
16.2167								78474	92519	70761	94796	86930	83962	122195	142708	142428	127781	121872	141960	149763	132890	136723	134808	129792	128768	134398	134719	147149	137899								127406	135748	152621	153996	151138	141499	130638	141152	118024	132057	86345	135669	130972
16.3								78270	91852	69844	95145	87151	83591	122596	140858	140995	128360	120463	141796	147734	134581	140488	136558	128714	127989	132890	134847	146904	137935								130417	134162	154597	151676	148348	139117	128332	135066	118530	133175	86429	138698	131442
16.3833								78831	92174	69839	94986	87061	83778	124562	140526	141177	127124	120332	137797	148544	132981																129817	133587	148720	153421	149769	142825	128733	133044	118633	130822	85475	137944	127448
16.4667								78590	92522	70030	95531	86036	83138	118586	138847	143466	127925	118402	141028	147790	137024																128156	133445	150862	151157	147765	140106	127605	138228	116918	132324	85966	136780	127358
16.55								78226	92540	70243	95114	86969	83341	119240	138786	139684	129296	119637	141570	146948	133147																128587	133838	149449	152057	147506	139266	126988	136060	117477	132688	85545	139910	127812
16.6333								77849	92288	69187	94434	86075	83107	122481	137677	142106	130402	120240	140200	147836	129607																127555	132003	148450	149878	146134	137111	130759	138709	118253	131330	84840	137730	131166
16.7167								78284	91855	69780	94705	85586	83364	121995	137102	140784	128436	120587	138342	147600	133159																129752	132511	145865	147462	147355	142043	128872	139251	117633	133508	84857	136781	127445
16.8								78200	91628	69636	94150	86839	83123	117564	138691	140167	125522	118432	139235	145017	132050																126804	136000	146509	150714	148158	142854	130172	135996	115423	129886	84715	135991	127542
16.8833								77928	91871	68621	94468	86224	83228	121237	139626	140106	127364	122796	139960	149095	131945																127506	132663	145957	149250	149126	138639	128843	137064	116657	129046	84629	138823	127172
16.9667								77245	91096	70000	94667	86119	82795	121004	139969	141045	127898	119167	138881	145405	130804																130138	131730	146484	149421	145856	137166	128444	137331	115737	133059	84202	136812	127531
17.05								77226	91625	69665	94521	86304	83120	119568	137683	135841	125499	117827	136770	147395	130749																128531	130752	147709	149614	147918	139102	129693	134549	115658	134797	85007	134917	130448
17.1333								78118	92408	69391	94275	86126	82992	120122	135042	142828	127314	120238	138093	143619	131541																128754	130419	147468	152227	146017	138816	124620	134719	113112	127089	84210	138734	129691
17.2167								77754	91842	69616	94436	85398	82939	119609	139922	143470	126234	117488	140676	148491	129035																126175	131498	145464	148382	145897	138697	126318	134100	118541	128082	84404	136411	128932
17.3								77551	91059	68955	94652	86265	82759	121136	140611	138994	126439	121664	137778	143812	132176																129139	131521	145456	147774	145076	139037	125405	137792	114060	130602	84081	135657	127314
17.3833								77315	91748	69244	93809	85184	82570	119792	136902	139775	127544	118356	138965	145874	131379																123162	132344	146936	147119	142114	139354	124444	134143	117385	130598	84151	137370	124079
17.4667								77621	90732	68980	93105	86125	82329	120388	139201	140424	125451	116371	139280	148169	130704																129003	134227	147296	149900	146202	141068	124243	131595	116152	128388	84706	132576	127565
17.55								77902	90954	68922	93141	85442	82410	117953	135303	138700	127705	118180	136465	143717	128766																126435	131824	147832	147137	146398	141270	128454	135618	115238	127055	83288	132615	129326
17.6333								77305	90744	69452	92968	85112	82636	118238	133958	138229	123381	115399	136469	143852	128131																125484	129209	146400	148195	145954	136672	125667	132854	114934	130362	83626	136477	126086
17.7167								77546	91349	69182	93907	85555	82470	116579	134994	138397	123520	116391	133972	144232	131590																125326	130527	146995	150295	149511	138757	126927	132685	114115	130558	83881	135769	124795
17.8								77065	91185	68933	93845	85336	82315	119922	136007	138290	124463	116638	137874	145774	131304																124103	129485	147581	147209	147407	142455	127966	132465	114889	131791	83698	132455	126376
17.8833								76461	90790	68851	92997	85220	82171	119034	135656	136417	124137	119887	135368	142687	131426																124100	131832	146012	149227	147032	135936	126542	134145	112999	130469	83835	136304	126977
17.9667								76160	90871	69095	93330	85838	82111	113989	136083	135766	125949	113709	137445	144147	126362																126040	131536	145957	148872	144360	138400	124232	131820	114168	128776	83401	134337	127231
18.05								77035	90573	68355	92241	85049	81894	119708	136470	134253	126623	114778	140298	140853	131130																123626	129405	143934	144622	141809	138773	124543	132103	116141	127611	82769	133319	125563
18.1333								76494	90615	69050	93186	84594	81116	117510	133646	138466	124954	115375	137238	141039	129129																127874	132566	142991	145275	144305	139352	123323	132771	112213	126523	83059	132297	125878
18.2167								76020	90576	68558	92311	84392	81798	119151	134285	140460	122322	115167	136944	140925	129340																124144	125744	146961	145842	142221	136377	120268	134318	113996	126723	82274	133280	125180
18.3								76484	90417	68202	92531	84198	81079	117516	133852	138399	122194	115249	136827	144212	128389																124599	128752	144696	149578	143829	134321	126130	131293	115188	131030	82937	134863	123818
18.3833								76290	90239	68619	91782	85250	81773	114880	134885	133342	124990	115760	135522	143244	128823																124404	130100	142965	147018	143401	135056	123312	131980	115213	126844	82903	131042	122691
18.4667								76178	89870	68437	92340	85546	80915	117291	135113	138796	125800	115287	137214	142143	127511																124771	134034	143431	145625	141688	136661	124529	133339	114011	127621	82211	136330	121715
18.55								75926	90452	68305	92375	85143	81734	116986	130605	137472	120221	114950	135988	140923	130321																121266	129937	144839	143796	146557	134861	124239	129220	110626	125692	81531	133841	125090
18.6333								77035	90444	68308	92092	84472	81471	115923	136341	134415	122545	112993	133589	140679	128512																123218	127408	144151	143427	143038	133780	125767	129013	113792	125271	82541	135297	127365
18.7167								75928	89903	67421	92051	84329	81175	115400	137380	137118	123087	113547	133913	139082	125981																123381	126925	143475	146146	142128	139558	124055	129564	112762	126460	82592	134755	123107
18.8								75915	89945	68109	91558	84555	81231	119064	134622	137582	122910	113737	133748	141493	126756																120293	126229	144092	142499	142757	136748	119862	131712	110878	127490	82308	132713	123944
18.8833								75723	89827	68559	92315	84642	80390	114810	134917	137579	122128	114802	132321	140451	126341																123252	126302	144313	143260	139809	134998	119185	130131	113024	126867	81645	130631	124306
18.9667								75545	89593	67673	91205	84247	81278	114474	130794	134643	121812	113079	132258	140796	124991																120272	128000	141558	147227	141637	133934	122060	133850	111239	128103	81160	131159	122704
19.05								74939	88977	67547	91701	83994	81164	117460	134494	136879	120033	113263	131535	140897	124389																120641	127830	142119	146365	141724	132117	118610	131538	112646	125182	81782	130290	120274
19.1333								75261	89704	68597	91978	83828	80400	114973	132177	134605	119471	116043	132289	140972	122781																118923	130068	144780	144191	141811	135140	121841	131031	113715	129205	81566	130029	122142
19.2167								75491	89429	67810	91711	84173	80557	114419	133290	133397	121844	113662	133042	137139	125382																122111	128533	141787	145651	142533	133022	120398	130246	113899	125058	81012	129990	125385
19.3								75329	89257	67704	91601	83958	80827	117441	133054	136177	123670	111473	134152	138902	126022																119965	127588	142334	142933	142281	136096	120277	129831
19.3833								75051	89781	67732	91431	84396	80290	117187	130702	133941	120678	113184	130748	140756	127983																119924	126003	143520	143498	142538	131439	119232	127903
19.4667								75301	89970	67163	91409	84184	80778	115202	132997	134254	123423	110607	130304	140964	126420																123649	123830	140821	143832	141019	133122	121410	130817
19.55								75886	89458	67432	90721	83769	80759	111855	129728	133130	122117	110607	132095	144088	128242																120683	126767	141656	144013	139522	132560	121850	129213
19.6333								74855	88855	66792	91192	83610	80093	112784	134925	135124	120461	112890	131488	137453	123287																120272	126136	140734	139638	139335	131644	121921	131990
19.7167								74855	89037	67640	90329	83002	80098	112493	132769	132949	119788	112130	132832	141399	123631																118134	125150	140859	146506	136772	132426	124567	132350
19.8								74090	88013	67199	90670	84486	79402	113934	132150	132236	117384	113485	130283	139640	127134																120498	126412	141633	142130	138470	131001	118494	127154
19.8833								75163	88909	67596	90581	82707	79899	113779	129499	130769	120761	110697	130800	137456	123093																120728	125783	143366	144132	140384	132702	119760	130162
19.9667								75151	89123	67677	90606	83266	79811	115765	129221	131233	117444	111079	129412	138825	123911																119541	126024	141361	144217	140463	133746	119990	129990
20.05								74442	88932	66642	91239	83147	79783	114065	132061	132806	119906	108215	130966	138674	125014																122544	121653	137288	142148	138999	131872	120403	127256
20.1333								74546	88620	66815	89772	83253	79900	112136	128048	129075	120862	109432	129351	138967	124434																122027	124581	140525	144140	137483	135515	119840	131786
20.2167								74841	88679	67309	90858	83536	80133	114625	127721	132809	120466	111598	129067	137390	123088																119798	125501	141497	141313	137649	131807	118618	128138
20.3								74516	88777	66855	90571	82043	79835	111971	131112	134184	116743	111094	128870	137356	124465																119547	126143	140965	141641	138850	132383	121596	128106
20.3833								74298	87422	66461	90548	83312	80069	112872	127907	131003	117317	110037	128761	137952	123942																116789	122588	139578	138960	138620	130685	116383	127613
20.4667								74548	88919	66797	90111	82491	80182	112778	127991	132348	120865	109010	128370	136813	122863																119468	124086	142190	140582	139701	134791	115421	124907
20.55								73468	88225	66454	90165	82917	78855	111392	127625	131325	114918	110607	130620	138336	123676																118041	123398	138098	141298	138685	130011	117851	127180
20.6333								74606	88116	66860	88895	82429	79727	113817	129642	129797	117211	111426	130472	134349	123488																118259	124573	138760	140748	136443	132803	116418	126432
20.7167								74024	88248	66204	89796	82332	79727	113463	128150	134265	121694	108475	127475	139538	125545																119115	123576	139250	138519	140234	130417	117200	123359
20.8								74291	87910	66663	88941	82595	79087	112669	128117	132762	118689	111354	129825	139151	123811																118474	126087	136872	137778	137616	132791	115801	126080
20.8833								73459	87673	66419	88680	83298	79157	110713	129562	130317	117402	110653	128388	133373	124130																118282	124730	140901	142259	140592	131335	115386	125409
20.9667								73934	88281	66207	89339	82873	78916	113525	130698	130436	117167	106940	128553	135870	122988																116685	122879	143588	141834	138447	130068	116265	124139
21.05								73508	87675	65694	89149	82965	78636	109018	129212	132501	118571	108823	127033	133024	123821																116624	122021	137341	141946	137418	129063	114747	126573
21.1333								73449	88287	66659	88432	82201	79154	110796	129145	131785	117158	111456	127310	136480	121323																114883	122466	139068	139385	139686	131214	117968	126049
21.2167								73315	87919	66461	89084	82296	79337	109595	126195	133937	116738	106978	128364	136334	122614																115415	123393	135512	137141	136047	127877	114442	125179
21.3								73706	87518	66833	89149	82215	78438	111570	127640	128582	116602	109265	127700	134656	122563																115509	121161	135597	137075	134945	129585	117469	125173
21.3833								72278	87934	66403	88163	82102	78618	110067	126160	131941	117493	106698	129219	136025	122105																116966	121703	137956	137183	136863	131338	116550	126447
21.4667								73707	86913	66666	88163	81750	78132	112264	128840	131822	116643	106352	126668	134106	123653																115873	122559	137779	141186	138800	126357	115750	125534
21.55								73326	87066	66491	88511	82848	78024	111187	125933	130154	115965	107031	126522	134554	120221																116632	120812	137479	140630	137249	131309	115846	126029
21.6333								73328	87785	65620	88556	81935	78315	110866	127426	129470	113142	108071	125986	133069	123348																118123	121028	135451	140985	134193	129030	117925	123261
21.7167								73034	87238	65909	88564	81672	78230	108442	125903	129249	117815	108689	126006	135546	118955																118432	121765	138930	139358	137347	128959	114516	121480
21.8								72844	87060	65809	88155	81750	77833	110292	127517	128727	116360	107918	126422	133428	118344																114092	121236	134806	140239	136383	130883	114037	125119
21.8833								73310	86708	65471	89214	82221	78507	109023	124692	127689	113685	106221	123361	133539	123523																112513	120608	136732	138546	135782	129627	113608	124268
21.9667								73401	87009	65671	87802	81467	77863	109285	124970	127875	113191	107119	123621	131810	119015																115453	122806	136271	137875	132461	127889	115584	127878
22.05								72373	87238	65611	87991	82048	77694	110349	125435	128716	118205	106003	124079	134616	117291																112212	119501	137010	137520	133569	129354	114332	122306
22.1333								72546	86603	65544	88263	81683	77724	109540	126141	128093	117440	106023	126471	137140	120756																111262	120381	136870	138465	135331	130047	113219	124584
22.2167								72484	86512	66050	87592	81276	78231	109484	126308	127556	117991	107888	127905	130703	120541																116615	120249	135753	138315	136409	130543	116151	121799
22.3								72566	86942	65501	87593	81112	77830	107051	125338	128657	115820	108285	126621	135271	121987																116485	122942	139519	136079	132996	126196	114171	122419
22.3833								71982	86879	66121	87501	81789	77084	107792	126032	127213	113482	107535	127390	131435	120134																115147	121070	139902	137308	134689	130951	116026	125778
22.4667								72166	86880	65720	87236	81688	77623	106735	122603	126076	114376	106873	125521	134087	121115																116064	118674	136152	138379	133699	127099	113023	122288
22.55								72015	86481	65239	86862	81479	77525	108499	125967	128995	114933	105030	122600	131582	119025																114228	118636	132637	135217	132246	125125	113445	122562
22.6333								72562	86293	65779	86683	80409	77402	108314	125144	125996	114446	104355	122946	133822	118739																113359	119484	135788	135884	135487	128322	111147	119384
22.7167								72314	86714	65217	86949	80662	77340	107470	123747	129169	113396	106008	124516	130907	117804																113947	120584	134191	134903	131829	128245	110461	122471
22.8								71349	85775	65320	87666	80280	77023	107141	127048	125343	113256	107323	123291	132233	117465																112666	118117	133987	134226	135391	125205	113219	123928
22.8833								72816	86110	65084	87314	80767	77165	107546	123417	126424	112172	106910	121122	128575	119472																112143	121472	136137	141454	130205	126004	112148	122304
22.9667								72178	85750	65124	87050	80177	76887																								113055	117148	134081	134781	133635	126751	115796	123947
23.05								71588	86133	65066	86158	80527	76938																								114535	117285	132262	135185	134502	125103	113519	121731
23.1333								70999	85595	65282	86648	80240	77243																								113770	117181	134577	136722	131564	126551	113334	121153
23.2167								71428	85553	65168	86260	80541	77661																								114086	117819	135102	135530	134241	126380	110486	121516
23.3								71622	85528	64660	86299	80890	76630																								113651	119648	130080	134591	131748	125851	111414	121154
23.3833								71825	85749	64644	85701	80129	77010																								114522	116406	133853	137977	133994	128755	112636	118937
23.4667								71867	84988	65074	86114	79794	76695																								113693	119200	132352	133652	131762	120766	109664	120632
23.55								71376	85240	65420	86005	79451	76453																								107720	118593	135242	134587	136778	127506	112373	121027
23.6333								71410	85594	64672	85753	79878	76797																								112411	119878	132322	134724	132917	124899	111444	119377
23.7167								70830	85382	64177	85371	79885	76431																								113476	115124	131296	135377	131351	125126	110709	122389
23.8								70807	85178	64334	85390	80082	76546																								110059	115278	132080	132852	131898	124123	112483	121814
23.8833								71726	84415	64105	85900	79845	76766																								109590	116243	130771	132933	128057	123606	110652	120988
23.9667								71388	85345	64516	86040	79531	76160																								113768	117662	133317	133856	136455	124374	109397	120597
24.05								70256	85326	64433	85886	80245	76154																								112077	116725	132211	132453	129965	126957	111034	119599
24.1333								70171	84855	64631	84879	79536	76918																								108944	116153	129255	133191	132933	124133	109258	119722
24.2167								69886	85360	64324	85007	79235	75722																								109947	115690	131206	134253	132311	122376	113318	119545
24.3								69628	84997	64541	85153	79314	75789																								112994	118879	131418	130165	131079	122178	108361	118526
24.3833								70489	85268	64086	85038	79640	75538																								110325	113776	131411	135227	130684	123721	108985	118251
24.4667								70553	85328	64305	84756	78918	75670																								110280	116311	130265	130551	127846	122459	108852	119902
24.55								70710	84900	64591	85589	79421	75659																								108301	114826	127750	131842	129550	120981	113984	120998
24.6333								69721	85254	63747	84635	78905	75951																								108098	117001	130508	132054	131069	120807	108080	119703
24.7167								70722	84000	64358	85565	78845	76384																								108071	114600	132200	129312	130571	121740	108334	120584
24.8								69962	84069	64146	84856	79261	76262																								111245	117013	131385	130824	126978	122987	108256	121289
24.8833								69996	84504	63712	84280	79045	75203																								109586	114488	130990	129375	131751	122419	105550	116264
24.9667								70291	84542	64065	85196	78446	75689																								108216	114422	131644	131709	127476	123172	108691	117795
25.05								70526	84199	63768	84364	78579	74763																								109679	115778	132694	130144	131747	122595	109107	116276
25.1333								70052	84337	64010	84052	79171	75692																								107513	114473	128311	128805	127696	123707	110465	120506
[truncated: 71 more columns]
