# Supplementary figures and images for: Rate-limiting transport of positively charged arginine residues through the Sec-machinery is integral to the mechanism of protein secretion
Source: eLife journal article supplement (doi:10.7554/elife.77586), 2022-04-29

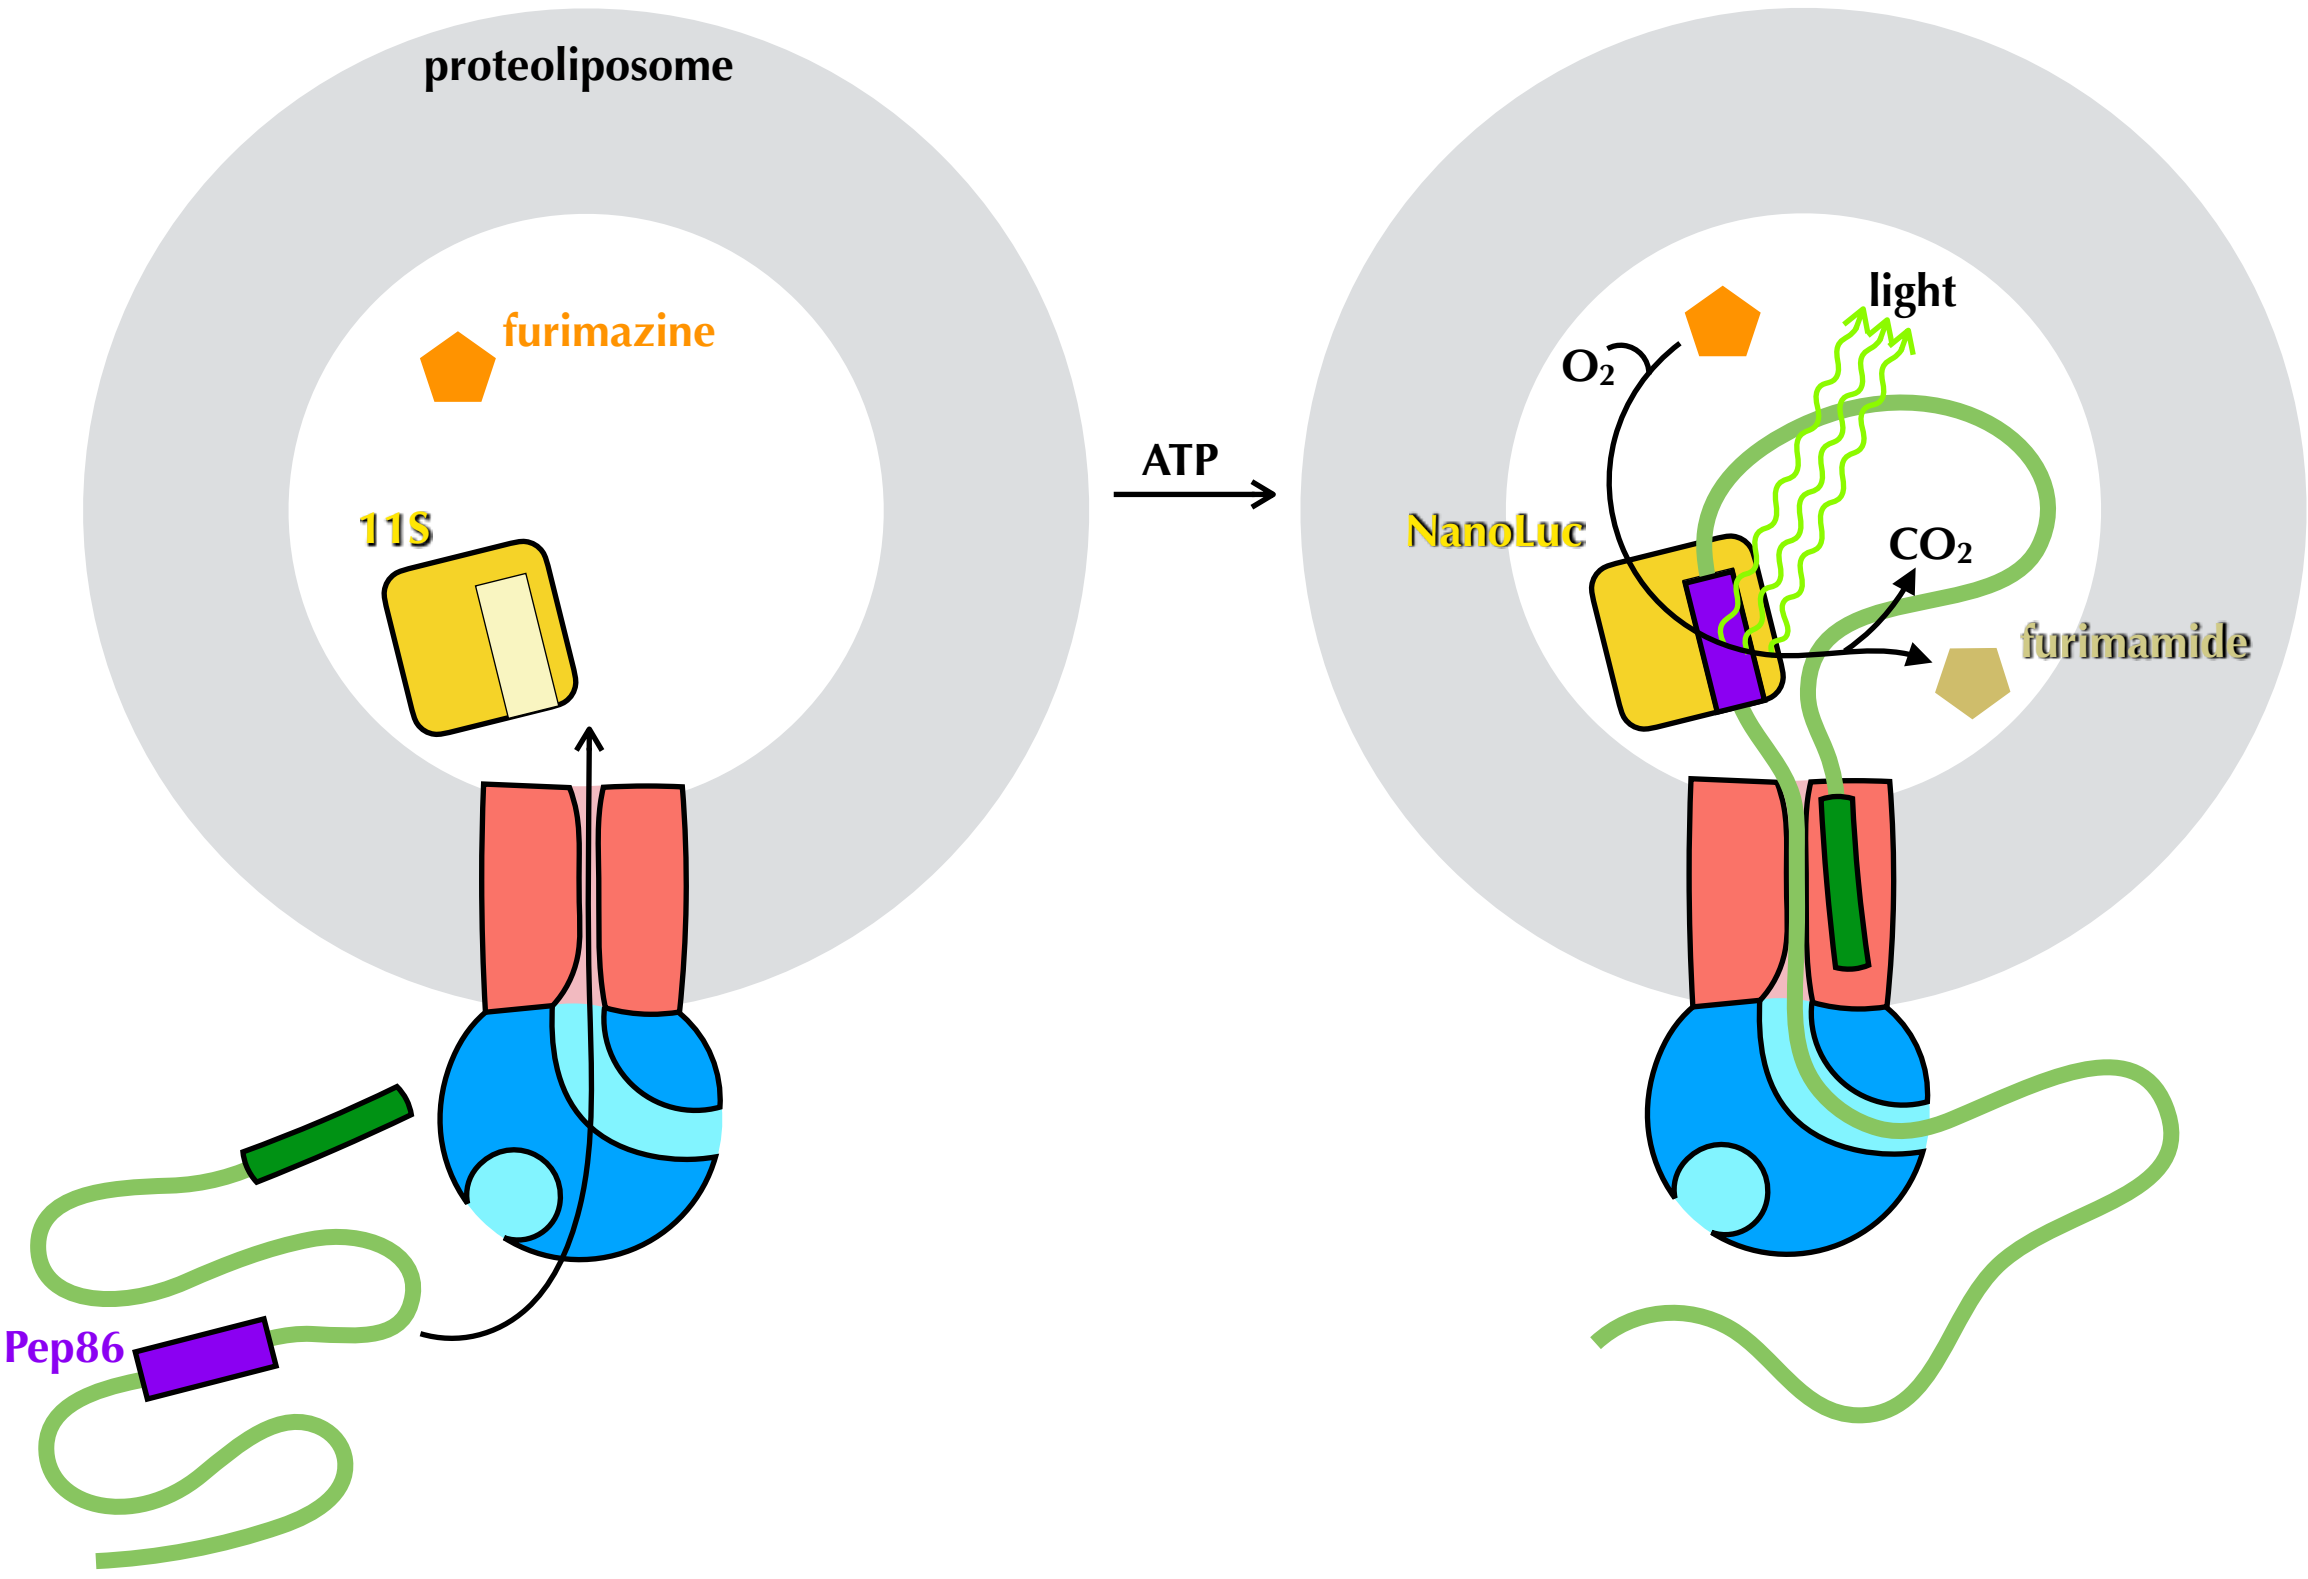

Supplement: supp [file elife_poa_e77586_Figure_1_figure_supplement_1.pdf › elife_poa_e77586_Figure_1_figure_supplement_1.pdf]

**a**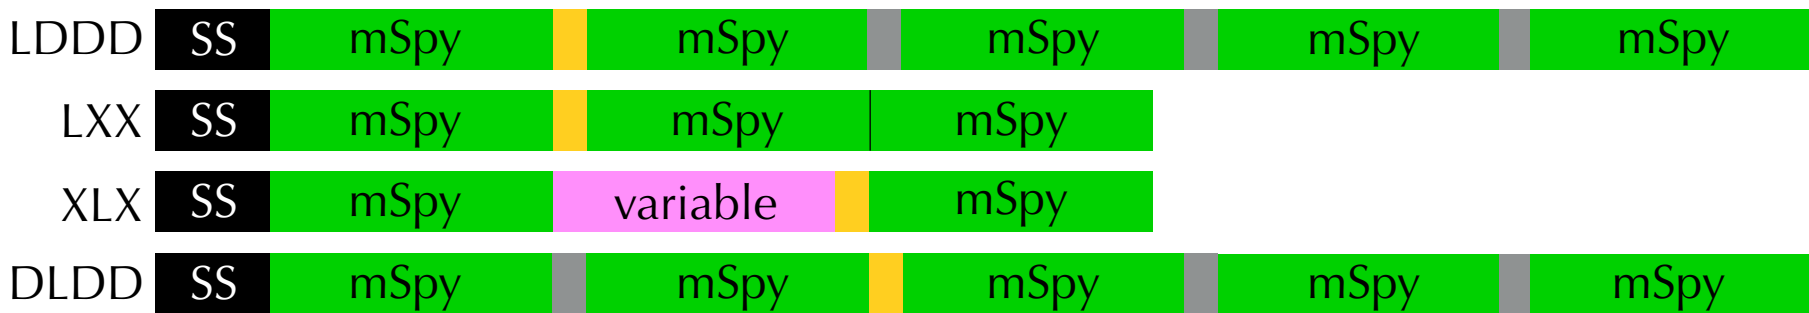**b**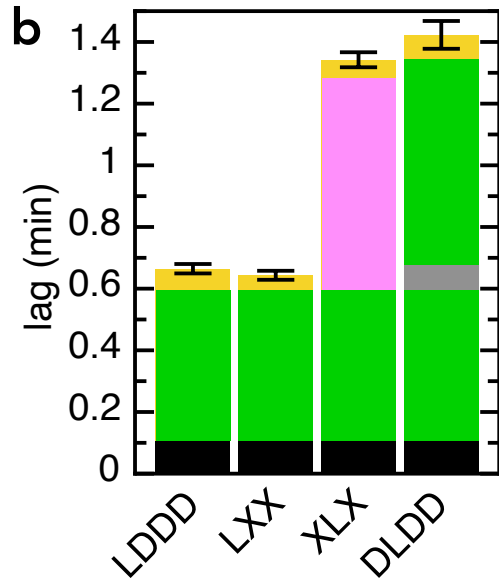

Supplement: supp [file elife_poa_e77586_Figure_2_figure_supplement_1.pdf › elife_poa_e77586_Figure_2_figure_supplement_1.pdf]

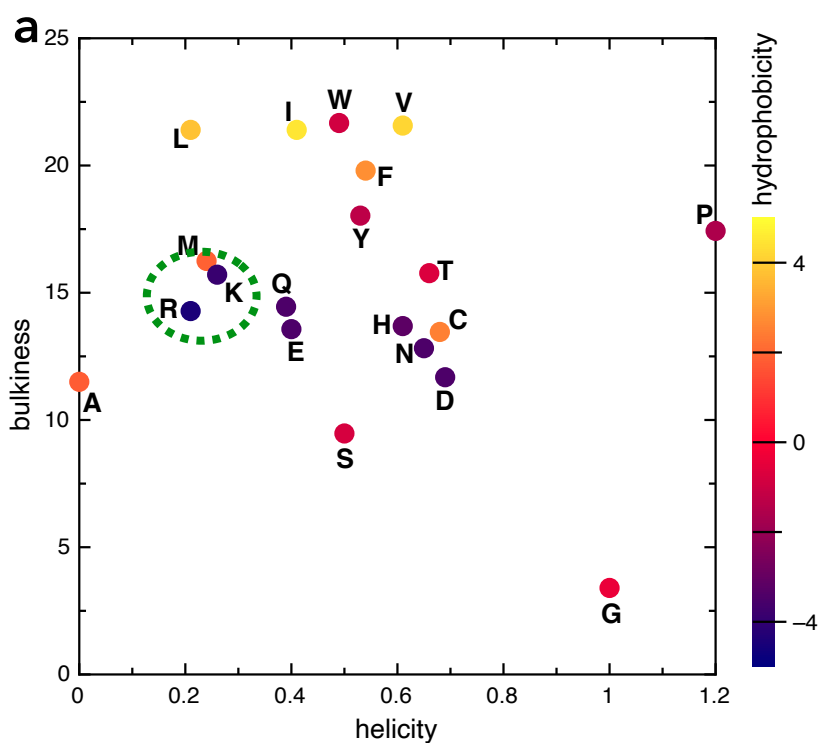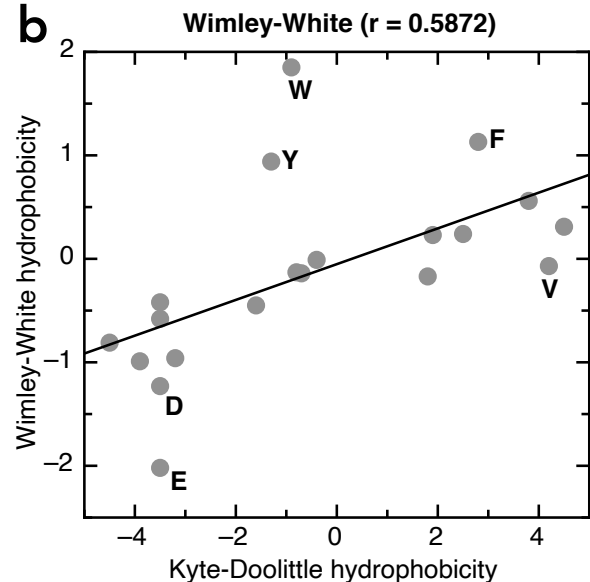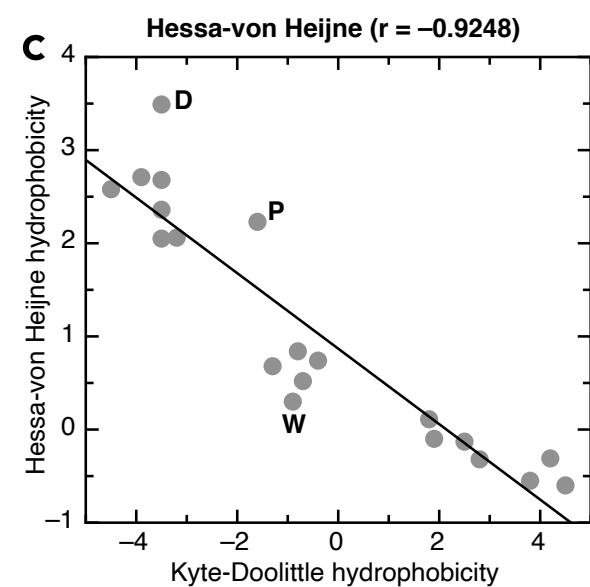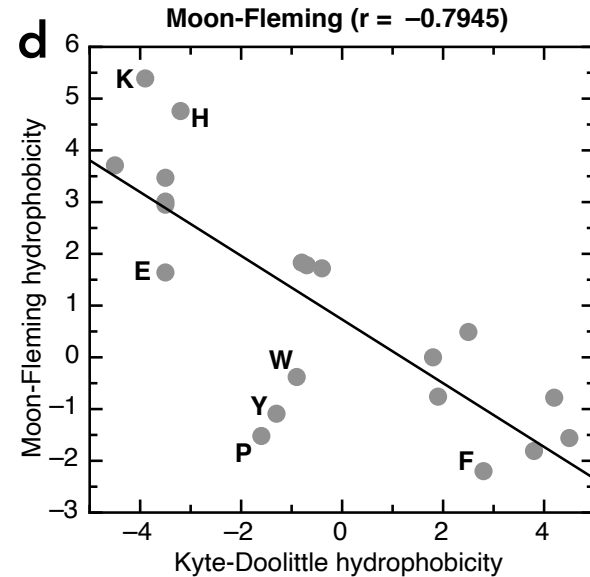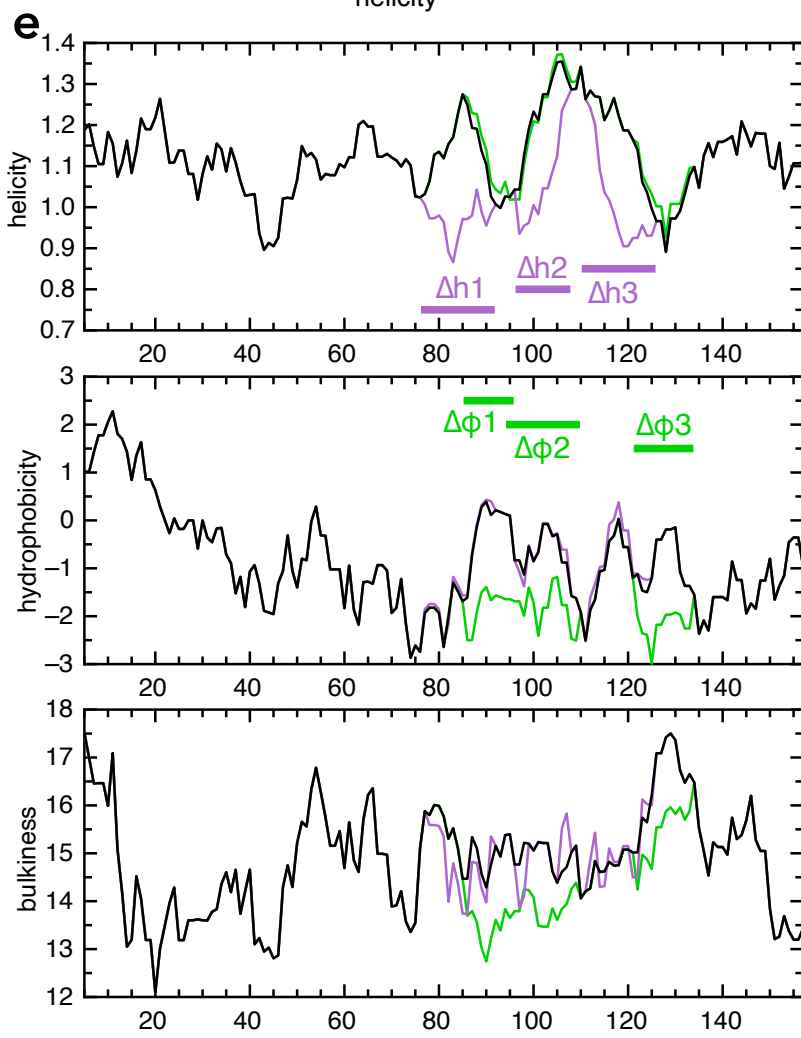

Supplement: supp [file elife_poa_e77586_Figure_2_figure_supplement_2.pdf › elife_poa_e77586_Figure_2_figure_supplement_2.pdf]

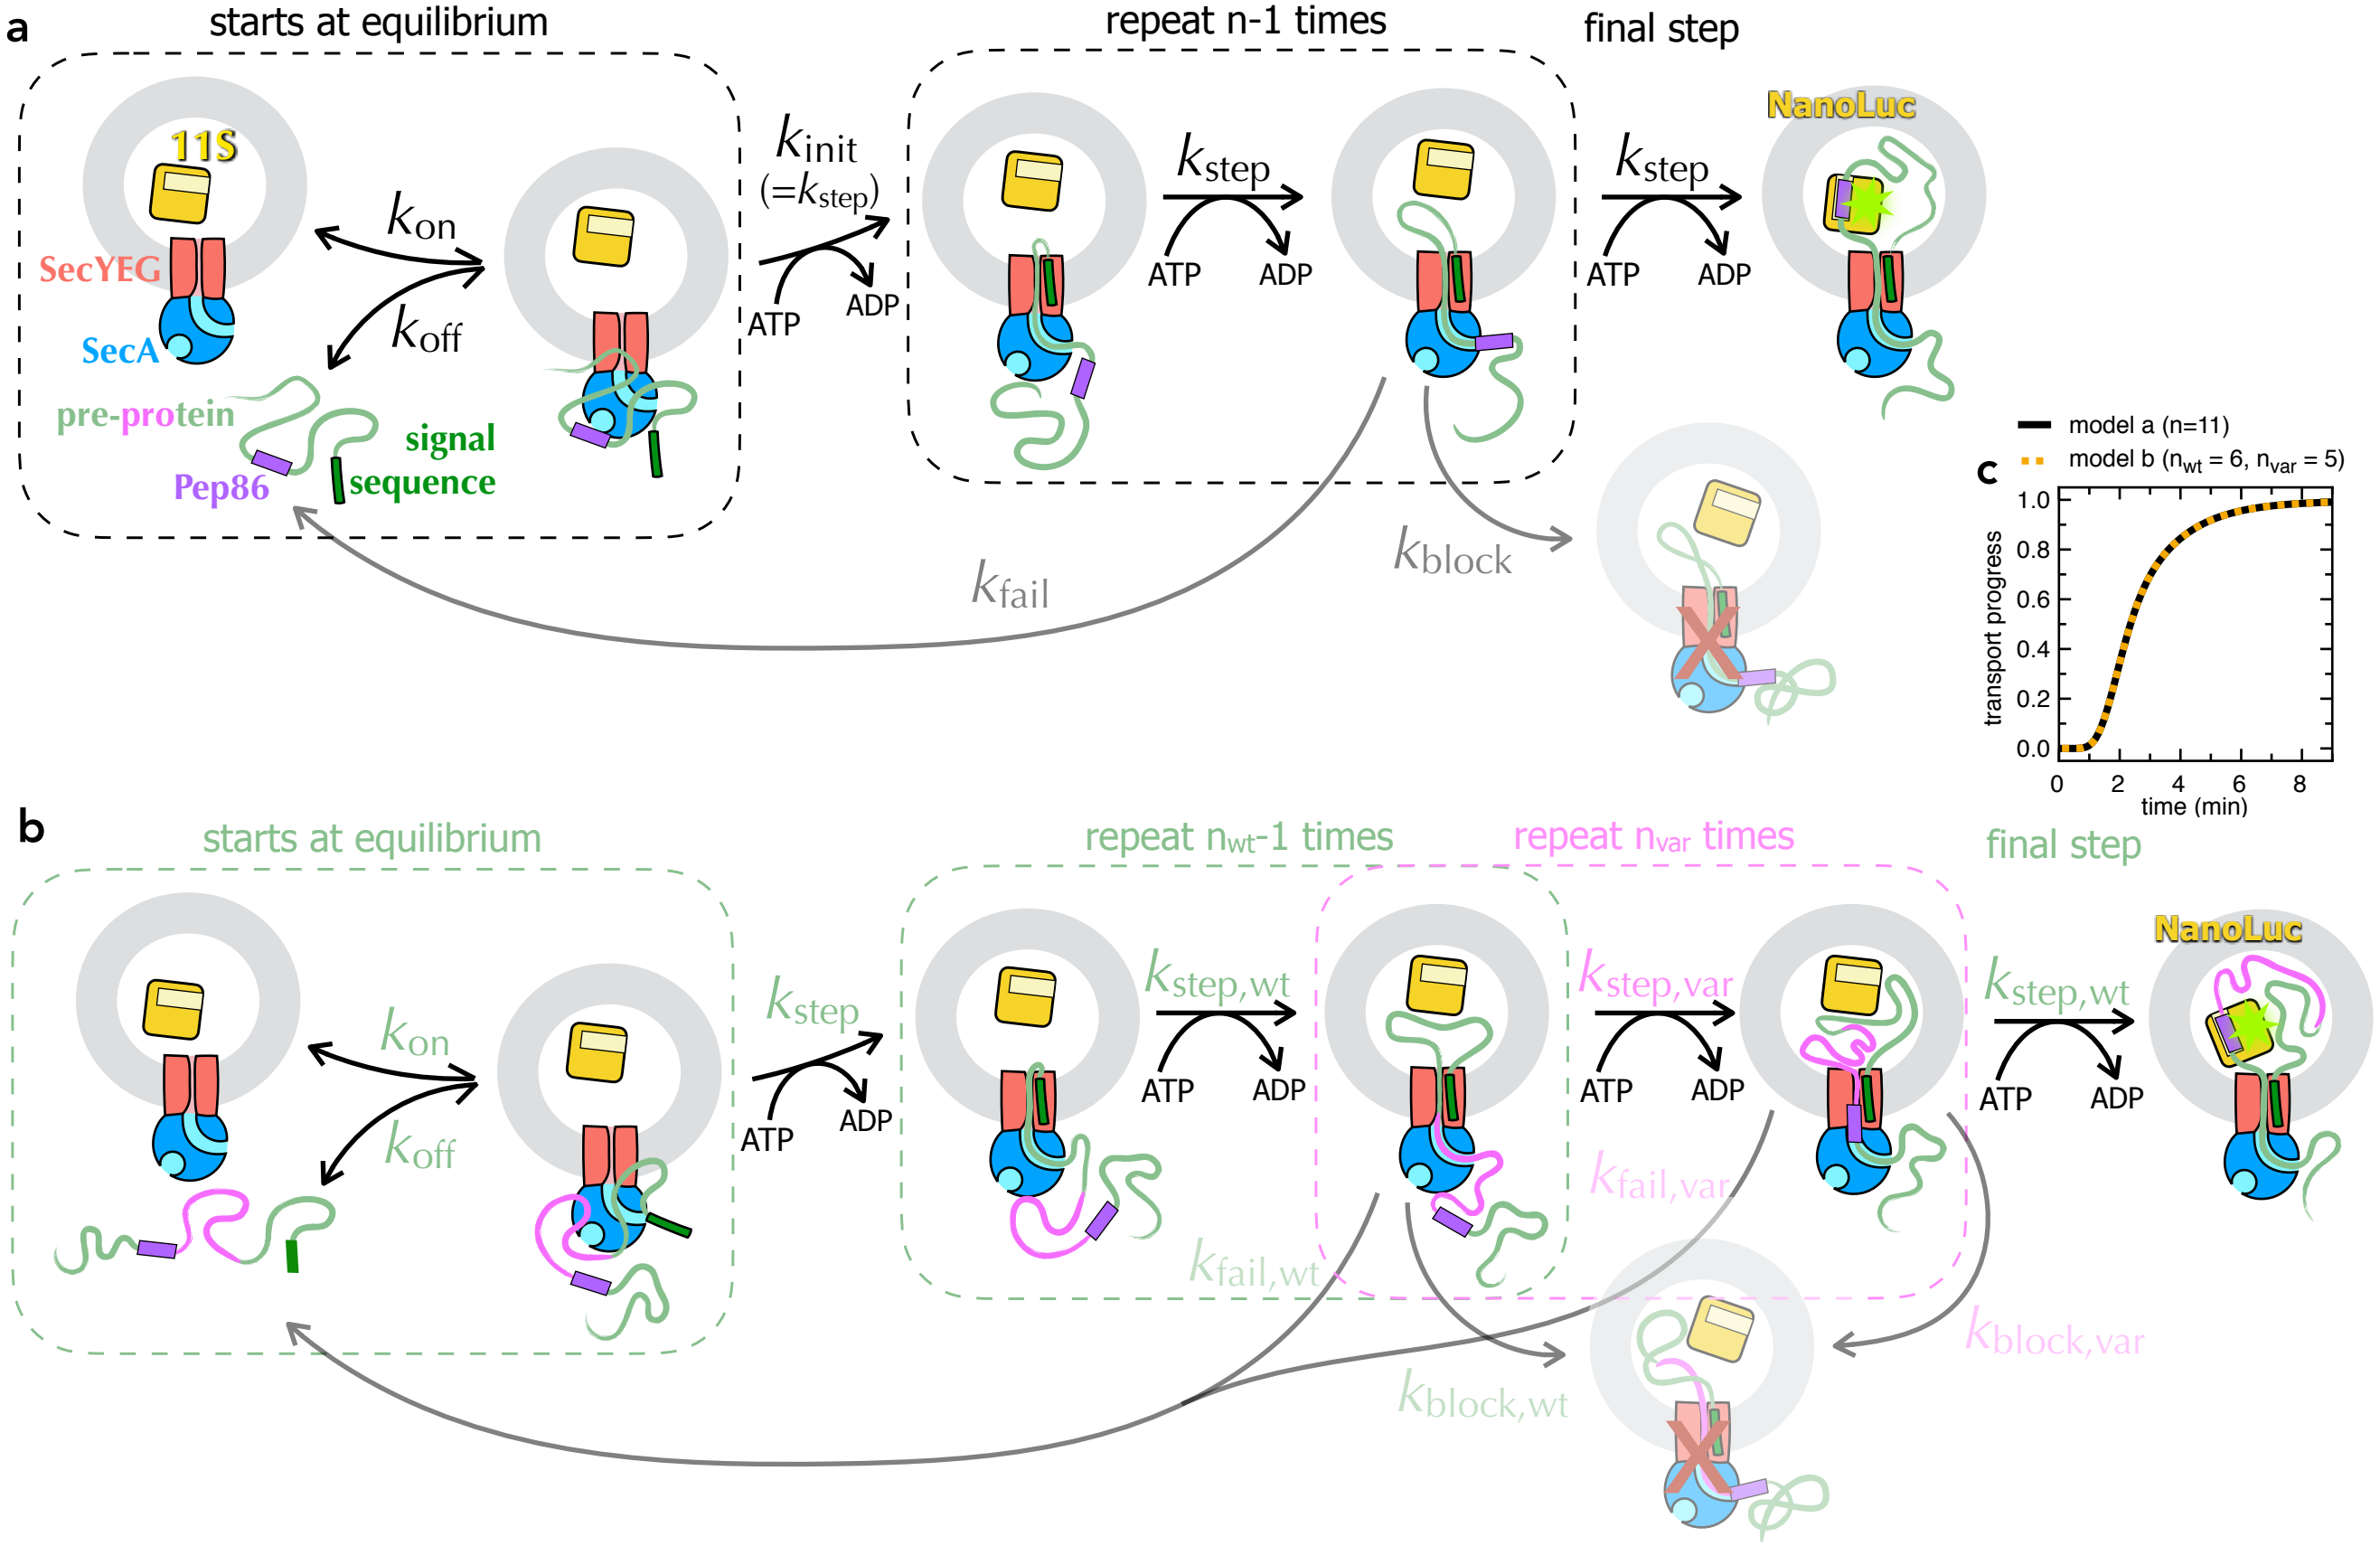

Supplement: supp [file elife_poa_e77586_Figure_3_figure_supplement_1.pdf › elife_poa_e77586_Figure_3_figure_supplement_1.pdf]

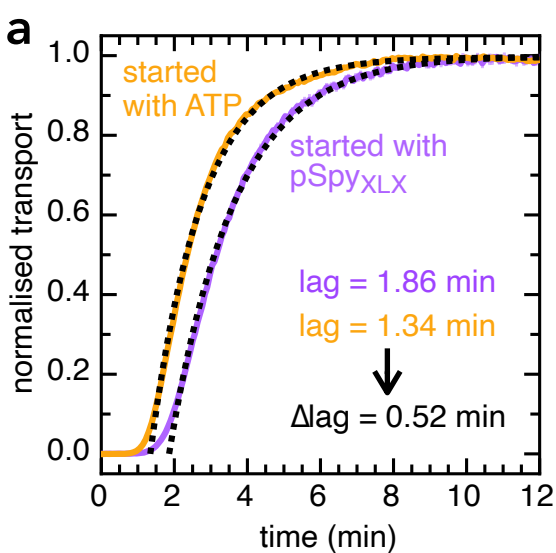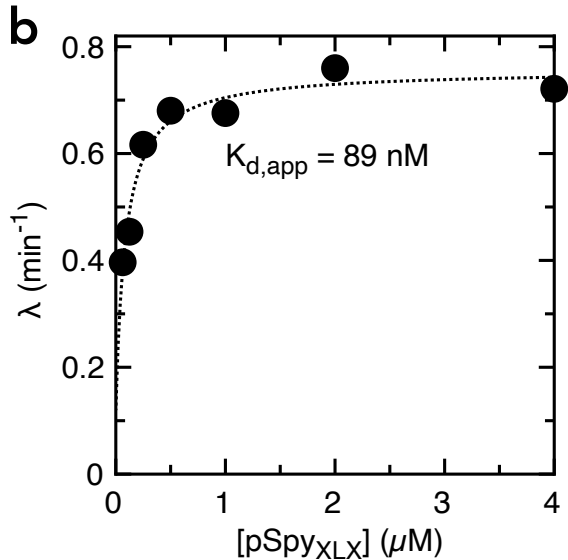

Supplement: supp [file elife_poa_e77586_Figure_3_figure_supplement_2.pdf › elife_poa_e77586_Figure_3_figure_supplement_2.pdf]

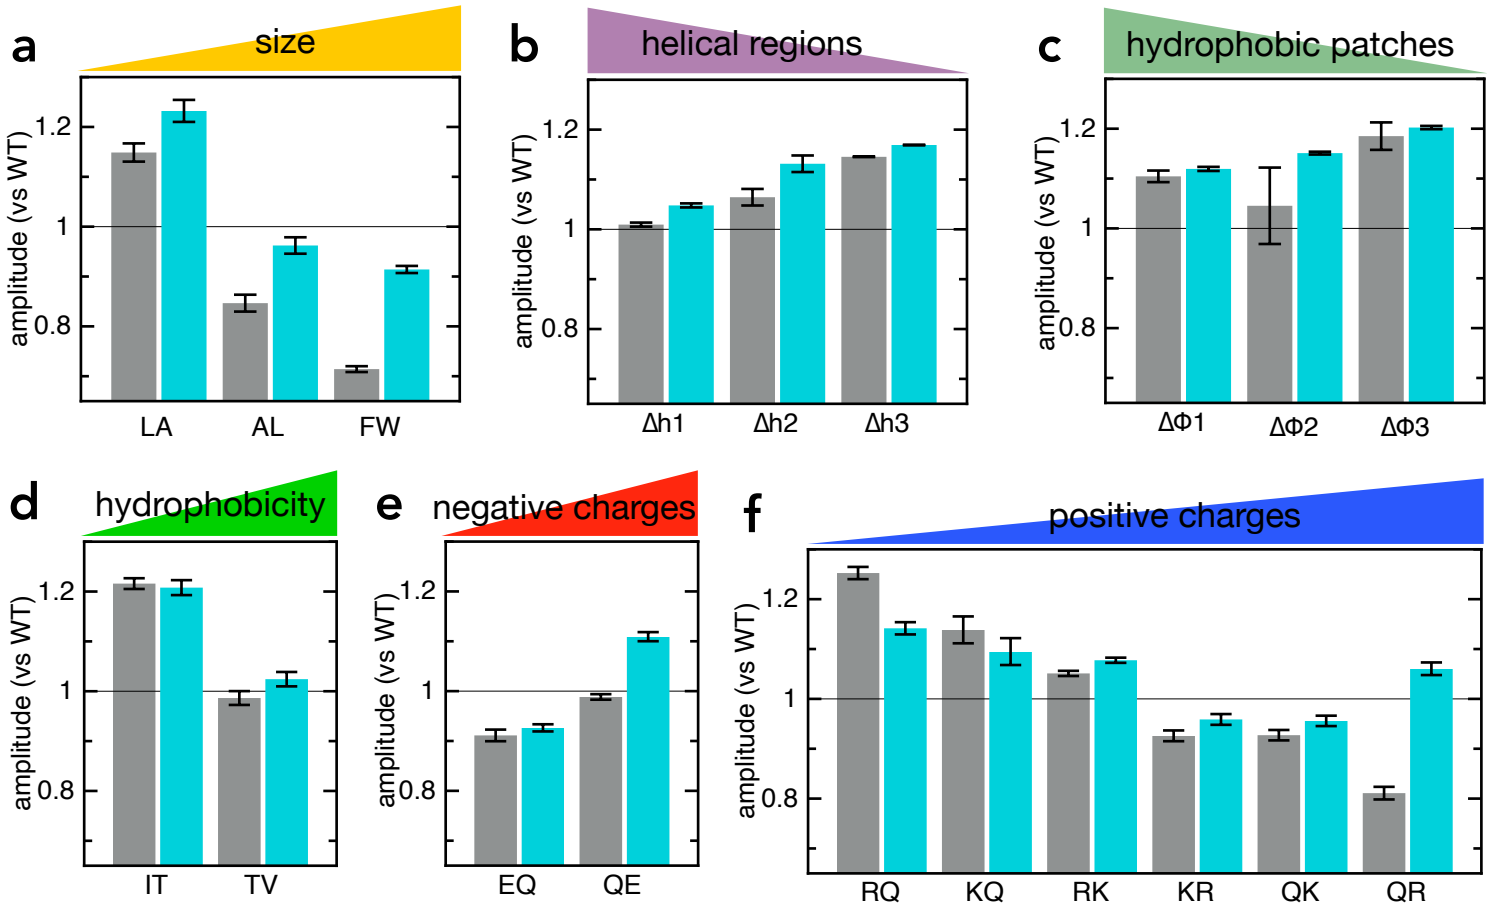

Supplement: supp [file elife_poa_e77586_Figure_3_figure_supplement_3.pdf › elife_poa_e77586_Figure_3_figure_supplement_3.pdf]

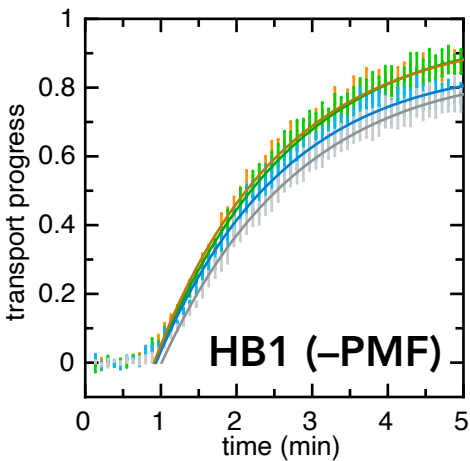

Supplement: supp [file elife_poa_e77586_Figure_6_figure_supplement_1.pdf › elife_poa_e77586_Figure_6_figure_supplement_1.pdf]

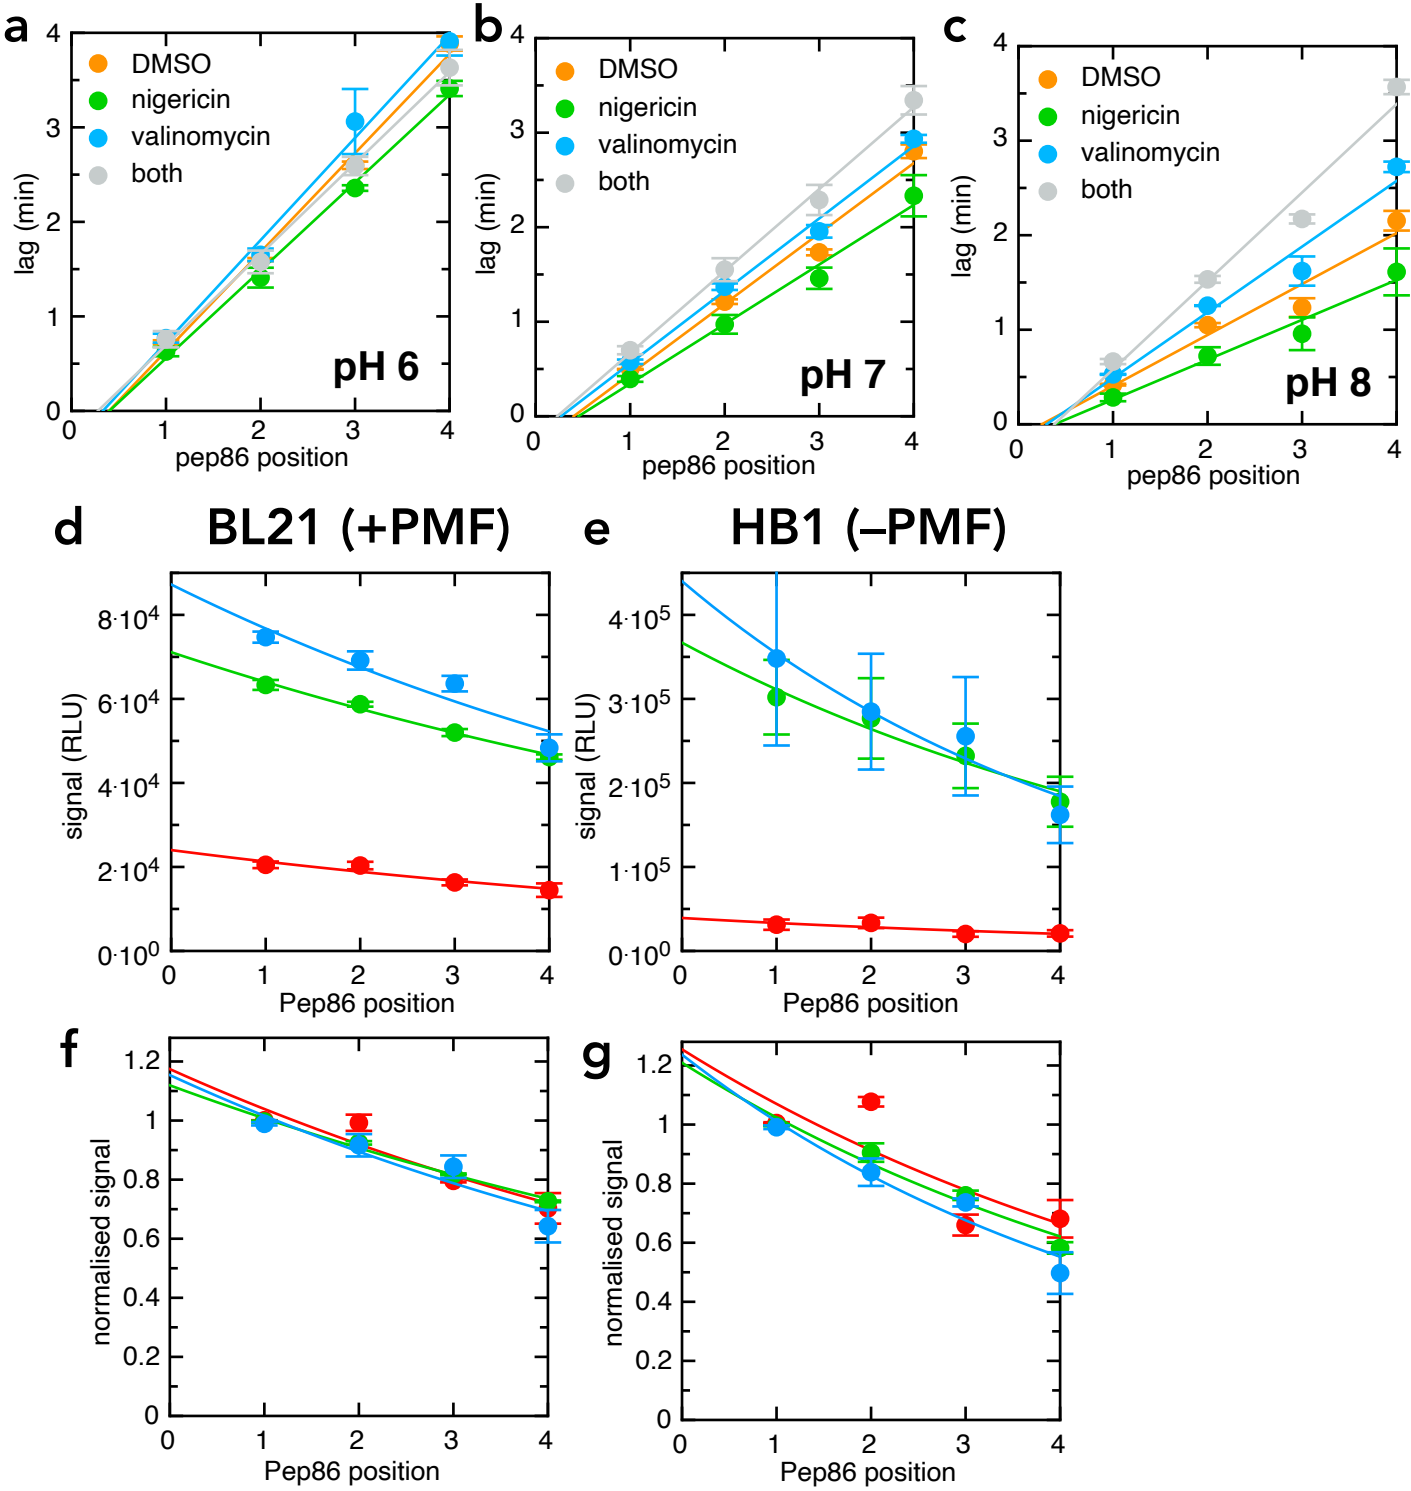

Supplement: supp [file elife_poa_e77586_Figure_6_figure_supplement_2.pdf › elife_poa_e77586_Figure_6_figure_supplement_2.pdf]

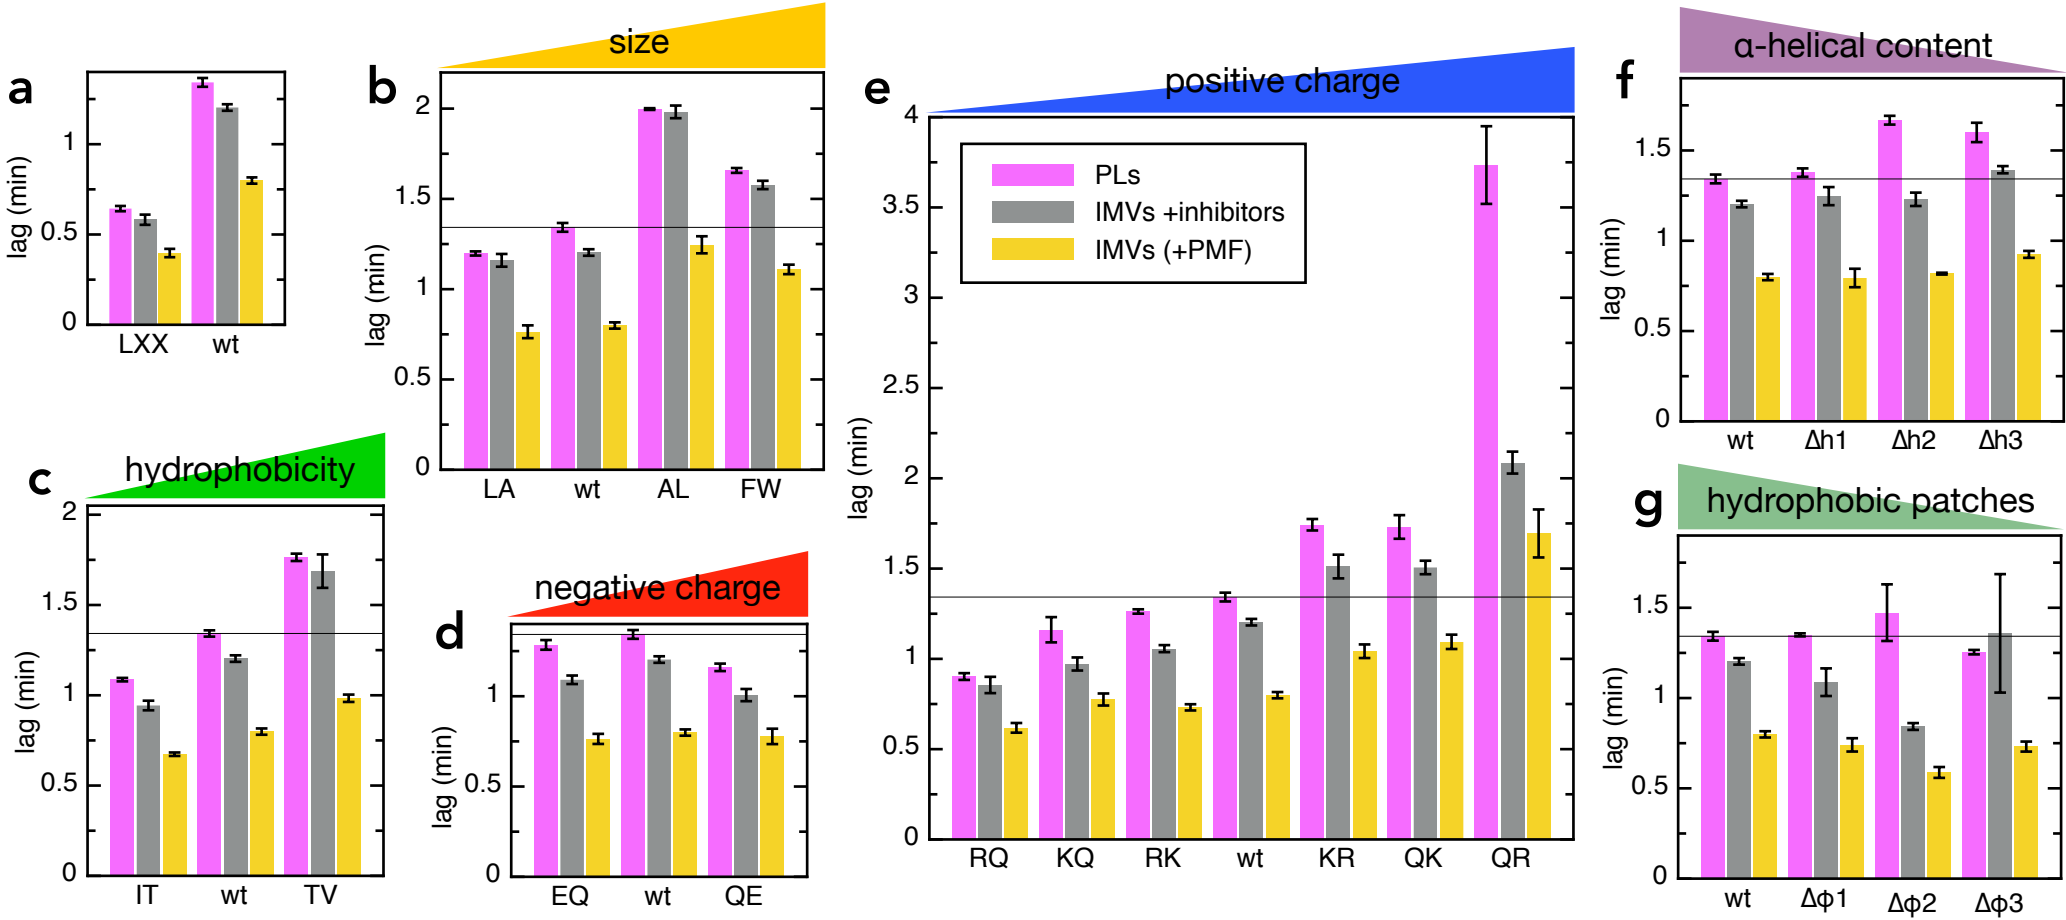

Supplement: supp [file elife_poa_e77586_Figure_7_figure_supplement_1.pdf › elife_poa_e77586_Figure_7_figure_supplement_1.pdf]
